# Supplementary material for: Genome-wide identification of pepper (Capsicum annuum L.) AAT gene family and expression analysis under salt stress
Source: Research Square preprint supplement (doi:10.21203/rs.3.rs-6327205/v1), 2025-06-12
Supplement: Supplementary file 1 [file 1aa83551214b36c69d229d0a.xlsx]

## Sheet: Sheet1
Table S2: Sequence information for phylogenetic tree.
Gene name	locus name
AtASP4-1	AT1G62800.1
AtASP4-2	AT1G62800.2
AtASP4-3	AT1G62800.3
AtASP1-1	AT2G30970.1
AtASP1-2	AT2G30970.2
AtASP5-1	AT4G31990.1
AtASP5-2	AT4G31990.2
AtASP5-3	AT4G31990.3
AtASP5-4	AT4G31990.4
AtASP3-1	AT5G11520.1
AtASP2-1	AT5G19550.1
CamAAT01	CA00g09810
CamAAT02	CA00g16570
CamAAT03	CA01g02040
CamAAT04	CA01g02050
CamAAT05	CA01g03950
CamAAT06	CA02g24710
CamAAT07	CA03g17110
CamAAT08	CA03g34590
CamAAT09	CA04g06460
CamAAT10	CA04g16840
CamAAT11	CA06g27380
CamAAT12	CA07g14280
CamAAT13	CA07g14630
CamAAT14	CA08g03040
CamAAT15	CA08g06160
CamAAT16	CA08g07680
CamAAT17	CA09g16680
CamAAT18	CA10g01500
CamAAT19	CA10g05940
CamAAT20	CA10g10790
CamAAT21	CA12g15660
CamAAT22	CA12g18900
CazAAT01	Capana01g000175
CazAAT02	Capana01g000176
CazAAT03	Capana01g000451
CazAAT04	Capana02g002931
CazAAT05	Capana03g002485
CazAAT06	Capana04g000721
CazAAT07	Capana04g001943
CazAAT08	Capana06g000029
CazAAT09	Capana07g001709
CazAAT10	Capana07g001710
CazAAT11	Capana07g001814
CazAAT12	Capana08g000430
CazAAT13	Capana08g000820
CazAAT14	Capana08g000980
CazAAT15	Capana09g000213
CazAAT16	Capana10g000085
CazAAT17	Capana10g001251
CazAAT18	Capana10g001736
CazAAT19	Capana10g001745
CazAAT20	Capana12g000452
CazAAT21	Capana12g000857
CazAAT22	Capana12g001792
CacAAT01	CC.CCv1.2.scaffold1196.21
CacAAT02	CC.CCv1.2.scaffold1372.3
CacAAT03	CC.CCv1.2.scaffold138.39
CacAAT04	CC.CCv1.2.scaffold225.134
CacAAT05	CC.CCv1.2.scaffold3.39
CacAAT06	CC.CCv1.2.scaffold303.74
CacAAT07	CC.CCv1.2.scaffold328.9
CacAAT08	CC.CCv1.2.scaffold38.4
CacAAT09	CC.CCv1.2.scaffold449.81
CacAAT10	CC.CCv1.2.scaffold449.82
CacAAT11	CC.CCv1.2.scaffold454.4
CacAAT12	CC.CCv1.2.scaffold475.37
CacAAT13	CC.CCv1.2.scaffold617.11
CacAAT14	CC.CCv1.2.scaffold617.12
CacAAT15	CC.CCv1.2.scaffold617.13
CacAAT16	CC.CCv1.2.scaffold656.17
CacAAT17	CC.CCv1.2.scaffold683.12
CacAAT18	CC.CCv1.2.scaffold734.49
CacAAT19	CC.CCv1.2.scaffold774.34
CacAAT20	CC.CCv1.2.scaffold780.7
CacAAT21	CC.CCv1.2.scaffold83.33
CacAAT22	CC.CCv1.2.scaffold857.44
CacAAT23	CC.CCv1.2.scaffold924.7
CacAAT24	CC.CCv1.2.scaffold98.8
GhAAT01	GH_A05G0587
GhGOT01	GH_A06G0690
GhAAT02	GH_A06G1098
GhAAT03	GH_A07G0276
GhGOT06	GH_A07G0277
GhGOT02	GH_A09G0041
GhGOT03	GH_A10G1610
GhGOT04	GH_D05G0584
GhGOT05	GH_D06G0665
GhAAT04	GH_D06G1121
GhGOT07	GH_D07G0288
GhGOT08	GH_D07G0289
GhGOT09	GH_D09G0044
GhGOT10	GH_D10G1279
NtAAT01	Nitab4.5_0000052g0220.1
NtAAT03	Nitab4.5_0000097g0090.1
NtAAT08	Nitab4.5_0000249g0160.1
NtAAT07	Nitab4.5_0000486g0030.1
NtAAT09	Nitab4.5_0002204g0060.1
NtAAT04	Nitab4.5_0005681g0020.1
NtAAT02	Nitab4.5_0007126g0030.1
NtAAT10	Nitab4.5_0007794g0030.1
NtAAT05	Nitab4.5_0009538g0010.1
NtAAT06	Nitab4.5_0009811g0010.1
OsAAT01	Os01t0760600-01
OsAAT02	Os01t0760600-02
OsAAT03	Os01t0760600-03
OsP37833	Os01t0760600-04
OsAAT06	Os02t0236000-01
OsAAT05	Os02t0797500-01
OsAAT04	Os02t0797500-02
OsQ0DBN4	Os06t0548000-01
SmAAT01	SMEL4.1_00g005290.1.01
SmAAT02	SMEL4.1_07g010070.1.01
SmAAT04	SMEL4.1_07g019330.1.01
SmAAT03	SMEL4.1_08g008850.1.01
SmAAT05	SMEL4.1_10g017700.1.01
SlAST2-4-1	Solyc07g032740.4.1
SlAST-1	Solyc07g055210.3.1
SlAAT01	Solyc08g041870.3.1
SlYSL4-1	Solyc08g068330.4.1
SlAAT02	Solyc10g075170.3.1
ZmGOT1-1	Zm00001eb152450_P001
ZmGOT1-2	Zm00001eb152450_P002
ZmGOT1-3	Zm00001eb152450_P003
ZmGOT1-4	Zm00001eb152450_P004
ZmGOT1-5	Zm00001eb152450_P005
ZmGOT3-1	Zm00001eb238900_P001
ZmGOT3-2	Zm00001eb238900_P002
ZmGOT3-3	Zm00001eb238900_P003
ZmGOT3-4	Zm00001eb238900_P004
ZmGOT3-5	Zm00001eb238900_P005
ZmGOT2-1	Zm00001eb257910_P001
ZmGOT2-2	Zm00001eb257910_P002
