# Supplementary material for: Genome-wide identification of pepper (Capsicum annuum L.) AAT gene family and expression analysis under salt stress
Source: Research Square preprint supplement (doi:10.21203/rs.3.rs-6327205/v1), 2025-06-12
Supplement: Supplementary file 2 [file 4ea37b22fc377d7e96034877.xlsx]

## Sheet: Sheet1
Table S3: Analysis of Cis-acting element in the CazAAT.
Gene Rename	Name of cis acting component	Function of cis acting element	Start position	End position
CazAAT01	MBS	MYB binding site involved in drought-inducibility	309	355
CazAAT01	MBS	MYB binding site involved in drought-inducibility	387	433
CazAAT01	MBS	MYB binding site involved in drought-inducibility	513	559
CazAAT01	O2-site	cis-acting regulatory element involved in zein metabolism regulation	779	827
CazAAT01	CGTCA-motif	cis-acting regulatory element involved in the MeJA-responsiveness	957	1002
CazAAT01	TGACG-motif	cis-acting regulatory element involved in the MeJA-responsiveness	957	1002
CazAAT01	LTR	cis-acting element involved in low-temperature responsiveness	1008	1054
CazAAT01	P-box	gibberellin-responsive element	1041	1088
CazAAT01	ARE	cis-acting regulatory element essential for the anaerobic induction	1087	1133
CazAAT01	ARE	cis-acting regulatory element essential for the anaerobic induction	1229	1275
CazAAT01	GATA-motif	part of a light responsive element	1285	1335
CazAAT01	I-box	part of a light responsive element	1286	1335
CazAAT01	AE-box	part of a module for light response	1344	1392
CazAAT02	TCT-motif	part of a light responsive element	124	170
CazAAT02	MBS	MYB binding site involved in drought-inducibility	309	355
CazAAT02	MBS	MYB binding site involved in drought-inducibility	387	433
CazAAT02	MBS	MYB binding site involved in drought-inducibility	513	559
CazAAT02	O2-site	cis-acting regulatory element involved in zein metabolism regulation	779	827
CazAAT02	LTR	cis-acting element involved in low-temperature responsiveness	1008	1054
CazAAT02	P-box	gibberellin-responsive element	1041	1088
CazAAT02	ARE	cis-acting regulatory element essential for the anaerobic induction	1229	1275
CazAAT02	GATA-motif	part of a light responsive element	1285	1334
CazAAT02	AE-box	part of a module for light response	1344	1392
CazAAT03	G-box	cis-acting regulatory element involved in light responsiveness	9	55
CazAAT03	G-Box	cis-acting regulatory element involved in light responsiveness	9	55
CazAAT03	ABRE	cis-acting element involved in the abscisic acid responsiveness	9	55
CazAAT03	ABRE	cis-acting element involved in the abscisic acid responsiveness	10	55
CazAAT03	MBS	MYB binding site involved in drought-inducibility	33	79
CazAAT03	G-box	cis-acting regulatory element involved in light responsiveness	64	110
CazAAT03	MRE	MYB binding site involved in light responsiveness	131	178
CazAAT03	ATCT-motif	part of a conserved DNA module involved in light responsiveness	243	292
CazAAT03	TGACG-motif	cis-acting regulatory element involved in the MeJA-responsiveness	555	600
CazAAT03	CGTCA-motif	cis-acting regulatory element involved in the MeJA-responsiveness	555	600
CazAAT03	TGACG-motif	cis-acting regulatory element involved in the MeJA-responsiveness	604	649
CazAAT03	CGTCA-motif	cis-acting regulatory element involved in the MeJA-responsiveness	604	649
CazAAT03	GATA-motif	part of a light responsive element	794	841
CazAAT03	TGACG-motif	cis-acting regulatory element involved in the MeJA-responsiveness	802	847
CazAAT03	CGTCA-motif	cis-acting regulatory element involved in the MeJA-responsiveness	802	847
CazAAT03	GT1-motif	light responsive element	894	940
CazAAT03	G-Box	cis-acting regulatory element involved in light responsiveness	909	955
CazAAT03	ABRE	cis-acting element involved in the abscisic acid responsiveness	910	955
CazAAT03	TCCC-motif	part of a light responsive element	977	1024
CazAAT03	GGA-motif	part of a light responsive element	979	1031
CazAAT03	MBS	MYB binding site involved in drought-inducibility	1008	1054
CazAAT03	ARE	cis-acting regulatory element essential for the anaerobic induction	1168	1214
CazAAT03	LTR	cis-acting element involved in low-temperature responsiveness	1171	1217
CazAAT03	GC-motif	enhancer-like element involved in anoxic specific inducibility	1402	1448
CazAAT03	GT1-motif	light responsive element	1434	1481
CazAAT03	TATC-box	cis-acting element involved in gibberellin-responsiveness	1475	1522
CazAAT04	G-box	cis-acting regulatory element involved in light responsiveness	20	69
CazAAT04	ABRE	cis-acting element involved in the abscisic acid responsiveness	20	69
CazAAT04	G-box	cis-acting regulatory element involved in light responsiveness	22	68
CazAAT04	G-Box	cis-acting regulatory element involved in light responsiveness	22	68
CazAAT04	ABRE	cis-acting element involved in the abscisic acid responsiveness	22	68
CazAAT04	ABRE	cis-acting element involved in the abscisic acid responsiveness	23	68
CazAAT04	TCT-motif	part of a light responsive element	343	389
CazAAT04	ACE	cis-acting element involved in light responsiveness	373	422
CazAAT04	ARE	cis-acting regulatory element essential for the anaerobic induction	505	551
CazAAT04	LTR	cis-acting element involved in low-temperature responsiveness	625	671
CazAAT04	P-box	gibberellin-responsive element	663	710
CazAAT04	O2-site	cis-acting regulatory element involved in zein metabolism regulation	673	722
CazAAT04	CGTCA-motif	cis-acting regulatory element involved in the MeJA-responsiveness	685	730
CazAAT04	TGACG-motif	cis-acting regulatory element involved in the MeJA-responsiveness	685	730
CazAAT04	ABRE	cis-acting element involved in the abscisic acid responsiveness	828	875
CazAAT04	O2-site	cis-acting regulatory element involved in zein metabolism regulation	860	909
CazAAT04	LTR	cis-acting element involved in low-temperature responsiveness	898	944
CazAAT04	RY-element	cis-acting regulatory element involved in seed-specific regulation	936	984
CazAAT04	LTR	cis-acting element involved in low-temperature responsiveness	978	1024
CazAAT04	TCA-element	cis-acting element involved in salicylic acid responsiveness	985	1034
CazAAT04	TGA-element	auxin-responsive element	1002	1048
CazAAT04	CGTCA-motif	cis-acting regulatory element involved in the MeJA-responsiveness	1117	1162
CazAAT04	TGACG-motif	cis-acting regulatory element involved in the MeJA-responsiveness	1117	1162
CazAAT04	ACE	cis-acting element involved in light responsiveness	1261	1310
CazAAT04	Box 4	part of a conserved DNA module involved in light responsiveness	1304	1350
CazAAT04	CGTCA-motif	cis-acting regulatory element involved in the MeJA-responsiveness	1400	1445
CazAAT04	TGACG-motif	cis-acting regulatory element involved in the MeJA-responsiveness	1400	1445
CazAAT05	MRE	MYB binding site involved in light responsiveness	21	68
CazAAT05	LTR	cis-acting element involved in low-temperature responsiveness	36	82
CazAAT05	TGA-element	auxin-responsive element	41	87
CazAAT05	MRE	MYB binding site involved in light responsiveness	134	181
CazAAT05	TGA-element	auxin-responsive element	186	232
CazAAT05	CGTCA-motif	cis-acting regulatory element involved in the MeJA-responsiveness	228	273
CazAAT05	TGACG-motif	cis-acting regulatory element involved in the MeJA-responsiveness	228	273
CazAAT05	CGTCA-motif	cis-acting regulatory element involved in the MeJA-responsiveness	418	463
CazAAT05	TGACG-motif	cis-acting regulatory element involved in the MeJA-responsiveness	418	463
CazAAT05	TGA-element	auxin-responsive element	457	503
CazAAT05	TCT-motif	part of a light responsive element	547	593
CazAAT05	GATA-motif	part of a light responsive element	755	802
CazAAT05	P-box	gibberellin-responsive element	878	925
CazAAT05	TCCC-motif	part of a light responsive element	971	1018
CazAAT05	GT1-motif	light responsive element	1381	1428
CazAAT05	ACE	cis-acting element involved in light responsiveness	1526	1575
CazAAT06	LTR	cis-acting element involved in low-temperature responsiveness	154	200
CazAAT06	GC-motif	enhancer-like element involved in anoxic specific inducibility	468	514
CazAAT06	HD-Zip 3	protein binding site	584	633.5
CazAAT06	Box 4	part of a conserved DNA module involved in light responsiveness	748	794
CazAAT06	GATA-motif	part of a light responsive element	755	802
CazAAT06	Box 4	part of a conserved DNA module involved in light responsiveness	907	953
CazAAT06	GATA-motif	part of a light responsive element	953	1000
CazAAT06	WUN-motif	wound-responsive element	956	1005
CazAAT06	ABRE	cis-acting element involved in the abscisic acid responsiveness	1114	1159
CazAAT06	G-Box	cis-acting regulatory element involved in light responsiveness	1114	1160
CazAAT06	ARE	cis-acting regulatory element essential for the anaerobic induction	1162	1208
CazAAT06	GATA-motif	part of a light responsive element	1354	1403
CazAAT06	I-box	part of a light responsive element	1355	1404
CazAAT07	I-box	part of a light responsive element	140	190
CazAAT07	TGACG-motif	cis-acting regulatory element involved in the MeJA-responsiveness	340	385
CazAAT07	CGTCA-motif	cis-acting regulatory element involved in the MeJA-responsiveness	340	385
CazAAT07	TGACG-motif	cis-acting regulatory element involved in the MeJA-responsiveness	472	517
CazAAT07	CGTCA-motif	cis-acting regulatory element involved in the MeJA-responsiveness	472	517
CazAAT07	GA-motif	part of a light responsive element	608	656
CazAAT07	TCT-motif	part of a light responsive element	983	1029
CazAAT07	ARE	cis-acting regulatory element essential for the anaerobic induction	1138	1184
CazAAT07	P-box	gibberellin-responsive element	1193	1240
CazAAT08	G-Box	cis-acting regulatory element involved in light responsiveness	239	285
CazAAT08	ABRE	cis-acting element involved in the abscisic acid responsiveness	239	284
CazAAT08	MBS	MYB binding site involved in drought-inducibility	504	550
CazAAT08	TATC-box	cis-acting element involved in gibberellin-responsiveness	563	610
CazAAT08	TGACG-motif	cis-acting regulatory element involved in the MeJA-responsiveness	610	655
CazAAT08	CGTCA-motif	cis-acting regulatory element involved in the MeJA-responsiveness	610	655
CazAAT08	GC-motif	enhancer-like element involved in anoxic specific inducibility	831	877
CazAAT08	ATC-motif	part of a conserved DNA module involved in light responsiveness	877	925
CazAAT08	ARE	cis-acting regulatory element essential for the anaerobic induction	907	953
CazAAT08	TGACG-motif	cis-acting regulatory element involved in the MeJA-responsiveness	922	967
CazAAT08	CGTCA-motif	cis-acting regulatory element involved in the MeJA-responsiveness	922	967
CazAAT08	GC-motif	enhancer-like element involved in anoxic specific inducibility	962	1008
CazAAT08	TGACG-motif	cis-acting regulatory element involved in the MeJA-responsiveness	1068	1113
CazAAT08	CGTCA-motif	cis-acting regulatory element involved in the MeJA-responsiveness	1068	1113
CazAAT08	GT1-motif	light responsive element	1178	1224
CazAAT09	G-box	cis-acting regulatory element involved in light responsiveness	93	139
CazAAT09	ABRE	cis-acting element involved in the abscisic acid responsiveness	94	139
CazAAT09	TCCC-motif	part of a light responsive element	487	534
CazAAT09	TCA-element	cis-acting element involved in salicylic acid responsiveness	734	783
CazAAT09	TCA-element	cis-acting element involved in salicylic acid responsiveness	828	877
CazAAT09	TCCC-motif	part of a light responsive element	998	1045
CazAAT09	TCT-motif	part of a light responsive element	1172	1218
CazAAT09	P-box	gibberellin-responsive element	1233	1280
CazAAT10	TCT-motif	part of a light responsive element	74	120
CazAAT10	LTR	cis-acting element involved in low-temperature responsiveness	173	219
CazAAT10	MBS	MYB binding site involved in drought-inducibility	246	292
CazAAT10	TGACG-motif	cis-acting regulatory element involved in the MeJA-responsiveness	467	512
CazAAT10	CGTCA-motif	cis-acting regulatory element involved in the MeJA-responsiveness	467	512
CazAAT10	Box 4	part of a conserved DNA module involved in light responsiveness	560	606
CazAAT10	I-box	part of a light responsive element	607	656
CazAAT10	ARE	cis-acting regulatory element essential for the anaerobic induction	689	735
CazAAT10	O2-site	cis-acting regulatory element involved in zein metabolism regulation	1085	1134
CazAAT10	AE-box	part of a module for light response	1251	1299
CazAAT11	G-box	cis-acting regulatory element involved in light responsiveness	73	119
CazAAT11	LAMP-element	part of a light responsive element	154	202
CazAAT11	ARE	cis-acting regulatory element essential for the anaerobic induction	200	246
CazAAT11	TC-rich repeats	cis-acting element involved in defense and stress responsiveness	221	270
CazAAT11	P-box	gibberellin-responsive element	582	629
CazAAT11	TCCC-motif	part of a light responsive element	656	703
CazAAT11	TCA-element	cis-acting element involved in salicylic acid responsiveness	812	861
CazAAT11	MBS	MYB binding site involved in drought-inducibility	896	942
CazAAT11	AE-box	part of a module for light response	954	1002
CazAAT12	GT1-motif	light responsive element	264	310
CazAAT12	MBS	MYB binding site involved in drought-inducibility	639	685
CazAAT12	MBS	MYB binding site involved in drought-inducibility	729	775
CazAAT12	G-Box	cis-acting regulatory element involved in light responsiveness	879	925
CazAAT12	G-box	cis-acting regulatory element involved in light responsiveness	879	925
CazAAT12	ABRE	cis-acting element involved in the abscisic acid responsiveness	879	925
CazAAT12	ABRE	cis-acting element involved in the abscisic acid responsiveness	880	925
CazAAT12	Box 4	part of a conserved DNA module involved in light responsiveness	953	999
CazAAT12	TCA-element	cis-acting element involved in salicylic acid responsiveness	1106	1155
CazAAT12	GATA-motif	part of a light responsive element	1129	1178
CazAAT12	CGTCA-motif	cis-acting regulatory element involved in the MeJA-responsiveness	1171	1216
CazAAT12	TGACG-motif	cis-acting regulatory element involved in the MeJA-responsiveness	1171	1216
CazAAT12	GATA-motif	part of a light responsive element	1175	1224
CazAAT12	3-AF1 binding site	light responsive element	1180	1230
CazAAT12	TCA-element	cis-acting element involved in salicylic acid responsiveness	1293	1342
CazAAT13	TGACG-motif	cis-acting regulatory element involved in the MeJA-responsiveness	30	75
CazAAT13	CGTCA-motif	cis-acting regulatory element involved in the MeJA-responsiveness	30	75
CazAAT13	TGA-element	auxin-responsive element	82	128
CazAAT13	GC-motif	enhancer-like element involved in anoxic specific inducibility	90	136
CazAAT13	TGACG-motif	cis-acting regulatory element involved in the MeJA-responsiveness	97	142
CazAAT13	CGTCA-motif	cis-acting regulatory element involved in the MeJA-responsiveness	97	142
CazAAT13	MBS	MYB binding site involved in drought-inducibility	441	487
CazAAT13	I-box	part of a light responsive element	501	551
CazAAT13	I-box	part of a light responsive element	502	551
CazAAT13	ARE	cis-acting regulatory element essential for the anaerobic induction	547	593
CazAAT13	TGACG-motif	cis-acting regulatory element involved in the MeJA-responsiveness	663	708
CazAAT13	CGTCA-motif	cis-acting regulatory element involved in the MeJA-responsiveness	663	708
CazAAT13	P-box	gibberellin-responsive element	762	809
CazAAT13	G-Box	cis-acting regulatory element involved in light responsiveness	915	961
CazAAT13	ABRE	cis-acting element involved in the abscisic acid responsiveness	916	961
CazAAT13	MBS	MYB binding site involved in drought-inducibility	977	1023
CazAAT13	AE-box	part of a module for light response	1058	1106
CazAAT13	G-box	cis-acting regulatory element involved in light responsiveness	1143	1189
CazAAT13	ABRE	cis-acting element involved in the abscisic acid responsiveness	1144	1189
CazAAT13	I-box	part of a light responsive element	1176	1225
CazAAT14	TCA-element	cis-acting element involved in salicylic acid responsiveness	294	343
CazAAT14	GT1-motif	light responsive element	538	587
CazAAT14	CGTCA-motif	cis-acting regulatory element involved in the MeJA-responsiveness	751	796
CazAAT14	TGACG-motif	cis-acting regulatory element involved in the MeJA-responsiveness	751	796
CazAAT14	TGA-element	auxin-responsive element	890	936
CazAAT14	TGA-element	auxin-responsive element	968	1014
CazAAT14	CGTCA-motif	cis-acting regulatory element involved in the MeJA-responsiveness	985	1030
CazAAT14	TGACG-motif	cis-acting regulatory element involved in the MeJA-responsiveness	985	1030
CazAAT14	LTR	cis-acting element involved in low-temperature responsiveness	1143	1189
CazAAT14	TGA-element	auxin-responsive element	1150	1196
CazAAT14	Gap-box	part of a light responsive element	1202	1251.5
CazAAT14	CGTCA-motif	cis-acting regulatory element involved in the MeJA-responsiveness	1425	1470
CazAAT14	TGACG-motif	cis-acting regulatory element involved in the MeJA-responsiveness	1425	1470
CazAAT15	TCA-element	cis-acting element involved in salicylic acid responsiveness	74	123
CazAAT15	TGA-element	auxin-responsive element	494	540
CazAAT15	MBS	MYB binding site involved in drought-inducibility	510	556
CazAAT15	TGACG-motif	cis-acting regulatory element involved in the MeJA-responsiveness	586	631
CazAAT15	CGTCA-motif	cis-acting regulatory element involved in the MeJA-responsiveness	586	631
CazAAT15	ARE	cis-acting regulatory element essential for the anaerobic induction	740	786
CazAAT15	ARE	cis-acting regulatory element essential for the anaerobic induction	842	888
CazAAT16	CGTCA-motif	cis-acting regulatory element involved in the MeJA-responsiveness	19	64
CazAAT16	TGACG-motif	cis-acting regulatory element involved in the MeJA-responsiveness	19	64
CazAAT16	TCA-element	cis-acting element involved in salicylic acid responsiveness	137	186
CazAAT16	ACE	cis-acting element involved in light responsiveness	423	472
CazAAT16	ARE	cis-acting regulatory element essential for the anaerobic induction	445	491
CazAAT16	GARE-motif	gibberellin-responsive element	635	682
CazAAT16	CGTCA-motif	cis-acting regulatory element involved in the MeJA-responsiveness	682	727
CazAAT16	TGACG-motif	cis-acting regulatory element involved in the MeJA-responsiveness	682	727
CazAAT16	ARE	cis-acting regulatory element essential for the anaerobic induction	716	762
CazAAT16	LTR	cis-acting element involved in low-temperature responsiveness	739	785
CazAAT16	ARE	cis-acting regulatory element essential for the anaerobic induction	1049	1095
CazAAT16	CGTCA-motif	cis-acting regulatory element involved in the MeJA-responsiveness	1111	1156
CazAAT16	TGACG-motif	cis-acting regulatory element involved in the MeJA-responsiveness	1111	1156
CazAAT16	TGA-element	auxin-responsive element	1255	1301
CazAAT17	3-AF1 binding site	light responsive element	131	181
CazAAT17	LAMP-element	part of a light responsive element	187	235
CazAAT17	ARE	cis-acting regulatory element essential for the anaerobic induction	197	243
CazAAT17	P-box	gibberellin-responsive element	531	578
CazAAT17	TGA-element	auxin-responsive element	582	628
CazAAT17	TC-rich repeats	cis-acting element involved in defense and stress responsiveness	590	639
CazAAT17	TCT-motif	part of a light responsive element	594	640
CazAAT17	GARE-motif	gibberellin-responsive element	781	828
CazAAT17	MBS	MYB binding site involved in drought-inducibility	893	939
CazAAT17	ARE	cis-acting regulatory element essential for the anaerobic induction	1126	1172
CazAAT18	MBS	MYB binding site involved in drought-inducibility	231	277
CazAAT18	GT1-motif	light responsive element	343	389
CazAAT18	G-Box	cis-acting regulatory element involved in light responsiveness	360	406
CazAAT18	ABRE	cis-acting element involved in the abscisic acid responsiveness	361	406
CazAAT18	ATCT-motif	part of a conserved DNA module involved in light responsiveness	401	450
CazAAT18	ATC-motif	part of a conserved DNA module involved in light responsiveness	540	588
CazAAT18	TCCC-motif	part of a light responsive element	653	700
CazAAT18	CGTCA-motif	cis-acting regulatory element involved in the MeJA-responsiveness	754	799
CazAAT18	TGACG-motif	cis-acting regulatory element involved in the MeJA-responsiveness	754	799
CazAAT18	Box 4	part of a conserved DNA module involved in light responsiveness	794	840
CazAAT18	O2-site	cis-acting regulatory element involved in zein metabolism regulation	884	933
CazAAT18	CGTCA-motif	cis-acting regulatory element involved in the MeJA-responsiveness	892	937
CazAAT18	TGACG-motif	cis-acting regulatory element involved in the MeJA-responsiveness	892	937
CazAAT18	AE-box	part of a module for light response	989	1037
CazAAT18	Sp1	light responsive element	1101	1147
CazAAT18	ARE	cis-acting regulatory element essential for the anaerobic induction	1229	1275
CazAAT19	ABRE	cis-acting element involved in the abscisic acid responsiveness	10	59
CazAAT19	GARE-motif	gibberellin-responsive element	188	235
CazAAT19	MBS	MYB binding site involved in drought-inducibility	312	358
CazAAT19	GT1-motif	light responsive element	355	401
CazAAT19	G-Box	cis-acting regulatory element involved in light responsiveness	372	418
CazAAT19	ABRE	cis-acting element involved in the abscisic acid responsiveness	373	418
CazAAT19	TGACG-motif	cis-acting regulatory element involved in the MeJA-responsiveness	610	655
CazAAT19	CGTCA-motif	cis-acting regulatory element involved in the MeJA-responsiveness	610	655
CazAAT19	ABRE	cis-acting element involved in the abscisic acid responsiveness	668	717
CazAAT19	G-Box	cis-acting regulatory element involved in light responsiveness	670	716
CazAAT19	ABRE	cis-acting element involved in the abscisic acid responsiveness	670	715
CazAAT19	TGACG-motif	cis-acting regulatory element involved in the MeJA-responsiveness	790	835
CazAAT19	CGTCA-motif	cis-acting regulatory element involved in the MeJA-responsiveness	790	835
CazAAT19	Box 4	part of a conserved DNA module involved in light responsiveness	815	861
CazAAT19	O2-site	cis-acting regulatory element involved in zein metabolism regulation	905	954
CazAAT19	TGA-element	auxin-responsive element	911	957
CazAAT19	GATA-motif	part of a light responsive element	1039	1088
CazAAT19	TGA-element	auxin-responsive element	1193	1239
CazAAT19	ARE	cis-acting regulatory element essential for the anaerobic induction	1250	1296
CazAAT19	G-box	cis-acting regulatory element involved in light responsiveness	1355	1401
CazAAT19	GATA-motif	part of a light responsive element	1468	1515
CazAAT20	P-box	gibberellin-responsive element	73	120
CazAAT20	GARE-motif	gibberellin-responsive element	183	230
CazAAT20	TCA-element	cis-acting element involved in salicylic acid responsiveness	733	783
CazAAT20	GT1-motif	light responsive element	741	788
CazAAT20	ARE	cis-acting regulatory element essential for the anaerobic induction	767	813
CazAAT20	O2-site	cis-acting regulatory element involved in zein metabolism regulation	1064	1114
CazAAT20	MBS	MYB binding site involved in drought-inducibility	1164	1210
CazAAT21	CGTCA-motif	cis-acting regulatory element involved in the MeJA-responsiveness	132	177
CazAAT21	TGACG-motif	cis-acting regulatory element involved in the MeJA-responsiveness	132	177
CazAAT21	TCA-element	cis-acting element involved in salicylic acid responsiveness	158	207
CazAAT21	AE-box	part of a module for light response	400	448
CazAAT21	ARE	cis-acting regulatory element essential for the anaerobic induction	425	471
CazAAT21	GATA-motif	part of a light responsive element	632	679
CazAAT21	GT1-motif	light responsive element	801	848
CazAAT21	CGTCA-motif	cis-acting regulatory element involved in the MeJA-responsiveness	1165	1210
CazAAT21	TGACG-motif	cis-acting regulatory element involved in the MeJA-responsiveness	1165	1210
CazAAT21	MBS	MYB binding site involved in drought-inducibility	1224	1270
CazAAT22	ABRE	cis-acting element involved in the abscisic acid responsiveness	168	214
CazAAT22	G-Box	cis-acting regulatory element involved in light responsiveness	168	214
CazAAT22	G-box	cis-acting regulatory element involved in light responsiveness	168	214
CazAAT22	ABRE	cis-acting element involved in the abscisic acid responsiveness	169	214
CazAAT22	MBS	MYB binding site involved in drought-inducibility	183	229
CazAAT22	TGACG-motif	cis-acting regulatory element involved in the MeJA-responsiveness	258	303
CazAAT22	CGTCA-motif	cis-acting regulatory element involved in the MeJA-responsiveness	258	303
CazAAT22	MBS	MYB binding site involved in drought-inducibility	288	334
CazAAT22	G-box	cis-acting regulatory element involved in light responsiveness	714	760
CazAAT22	L-box	part of a light responsive element	894	944
CazAAT22	TATC-box	cis-acting element involved in gibberellin-responsiveness	899	946
CazAAT22	GATA-motif	part of a light responsive element	902	949
CazAAT22	ARE	cis-acting regulatory element essential for the anaerobic induction	922	968
CazAAT22	AE-box	part of a module for light response	987	1035
CazAAT22	MBS	MYB binding site involved in drought-inducibility	1095	1141
CazAAT22	TCA-element	cis-acting element involved in salicylic acid responsiveness	1158	1207
CazAAT22	GA-motif	part of a light responsive element	1198	1246
CazAAT22	ARE	cis-acting regulatory element essential for the anaerobic induction	1413	1459
