# Supplementary material for: Genome-wide identification of pepper (Capsicum annuum L.) AAT gene family and expression analysis under salt stress
Source: Research Square preprint supplement (doi:10.21203/rs.3.rs-6327205/v1), 2025-06-12
Supplement: Supplementary file 3 [file 875de6babd0d6937d44636bf.xlsx]

## Sheet: Sheet1
Abiotic stress	Gene	identifier	category	term ID	term description
Cold stress	T459_00606	4072.A0A2G3AES2	GO Process	GO:0006082	Organic acid metabolic process
	T459_00606	4072.A0A2G3AES2	GO Process	GO:0006520	Cellular amino acid metabolic process
	T459_00606	4072.A0A2G3AES2	GO Process	GO:0006553	Lysine metabolic process
	T459_00606	4072.A0A2G3AES2	GO Process	GO:0006807	Nitrogen compound metabolic process
	T459_00606	4072.A0A2G3AES2	GO Process	GO:0008152	Metabolic process
	T459_00606	4072.A0A2G3AES2	GO Process	GO:0008652	Cellular amino acid biosynthetic process
	T459_00606	4072.A0A2G3AES2	GO Process	GO:0009058	Biosynthetic process
	T459_00606	4072.A0A2G3AES2	GO Process	GO:0009066	Aspartate family amino acid metabolic process
	T459_00606	4072.A0A2G3AES2	GO Process	GO:0009067	Aspartate family amino acid biosynthetic process
	T459_00606	4072.A0A2G3AES2	GO Process	GO:0009085	Lysine biosynthetic process
	T459_00606	4072.A0A2G3AES2	GO Process	GO:0009089	Lysine biosynthetic process via diaminopimelate
	T459_00606	4072.A0A2G3AES2	GO Process	GO:0009987	Cellular process
	T459_00606	4072.A0A2G3AES2	GO Process	GO:0016053	Organic acid biosynthetic process
	T459_00606	4072.A0A2G3AES2	GO Process	GO:0019752	Carboxylic acid metabolic process
	T459_00606	4072.A0A2G3AES2	GO Process	GO:0043436	Oxoacid metabolic process
	T459_00606	4072.A0A2G3AES2	GO Process	GO:0043648	Dicarboxylic acid metabolic process
	T459_00606	4072.A0A2G3AES2	GO Process	GO:0044237	Cellular metabolic process
	T459_00606	4072.A0A2G3AES2	GO Process	GO:0044238	Primary metabolic process
	T459_00606	4072.A0A2G3AES2	GO Process	GO:0044249	Cellular biosynthetic process
	T459_00606	4072.A0A2G3AES2	GO Process	GO:0044281	Small molecule metabolic process
	T459_00606	4072.A0A2G3AES2	GO Process	GO:0044283	Small molecule biosynthetic process
	T459_00606	4072.A0A2G3AES2	GO Process	GO:0046394	Carboxylic acid biosynthetic process
	T459_00606	4072.A0A2G3AES2	GO Process	GO:0046451	Diaminopimelate metabolic process
	T459_00606	4072.A0A2G3AES2	GO Process	GO:0071704	Organic substance metabolic process
	T459_00606	4072.A0A2G3AES2	GO Process	GO:1901564	Organonitrogen compound metabolic process
	T459_00606	4072.A0A2G3AES2	GO Process	GO:1901566	Organonitrogen compound biosynthetic process
	T459_00606	4072.A0A2G3AES2	GO Process	GO:1901576	Organic substance biosynthetic process
	T459_00606	4072.A0A2G3AES2	GO Process	GO:1901605	Alpha-amino acid metabolic process
	T459_00606	4072.A0A2G3AES2	GO Process	GO:1901607	Alpha-amino acid biosynthetic process
	T459_00606	4072.A0A2G3AES2	GO Function	GO:0003824	Catalytic activity
	T459_00606	4072.A0A2G3AES2	GO Function	GO:0008836	Diaminopimelate decarboxylase activity
	T459_00606	4072.A0A2G3AES2	GO Function	GO:0016829	Lyase activity
	T459_00606	4072.A0A2G3AES2	GO Function	GO:0016830	Carbon-carbon lyase activity
	T459_00606	4072.A0A2G3AES2	GO Function	GO:0016831	Carboxy-lyase activity
	T459_00606	4072.A0A2G3AES2	GO Component	GO:0005622	Intracellular anatomical structure
	T459_00606	4072.A0A2G3AES2	GO Component	GO:0005737	Cytoplasm
	T459_00606	4072.A0A2G3AES2	GO Component	GO:0009507	Chloroplast
	T459_00606	4072.A0A2G3AES2	GO Component	GO:0009536	Plastid
	T459_00606	4072.A0A2G3AES2	GO Component	GO:0043226	Organelle
	T459_00606	4072.A0A2G3AES2	GO Component	GO:0043227	Membrane-bounded organelle
	T459_00606	4072.A0A2G3AES2	GO Component	GO:0043229	Intracellular organelle
	T459_00606	4072.A0A2G3AES2	GO Component	GO:0043231	Intracellular membrane-bounded organelle
	T459_00606	4072.A0A2G3AES2	GO Component	GO:0110165	Cellular anatomical entity
	T459_00606	4072.A0A2G3AES2	STRING clusters	CL:14632	Mixed, incl. Glutamine family amino acid metabolic process, and Polyamine biosynthetic process
	T459_00606	4072.A0A2G3AES2	STRING clusters	CL:14829	Mixed, incl. Polyamine biosynthetic process, and Arginine biosynthetic process
	T459_00606	4072.A0A2G3AES2	STRING clusters	CL:14830	Arginine metabolic process, and Diaminopimelate metabolic process
	T459_00606	4072.A0A2G3AES2	STRING clusters	CL:14831	Arginine biosynthetic process, and LL-diaminopimelate aminotransferase/aminotransferase ALD1
	T459_00606	4072.A0A2G3AES2	STRING clusters	CL:14877	Lysine biosynthesis, and Dihydrodipicolinate reductase
	T459_00606	4072.A0A2G3AES2	KEGG	cann00300	Lysine biosynthesis
	T459_00606	4072.A0A2G3AES2	KEGG	cann01100	Metabolic pathways
	T459_00606	4072.A0A2G3AES2	KEGG	cann01110	Biosynthesis of secondary metabolites
	T459_00606	4072.A0A2G3AES2	KEGG	cann01230	Biosynthesis of amino acids
	T459_00606	4072.A0A2G3AES2	Reactome	MAP-1430728	Metabolism
	T459_00606	4072.A0A2G3AES2	Reactome	MAP-351202	Metabolism of polyamines
	T459_00606	4072.A0A2G3AES2	Reactome	MAP-71291	Metabolism of amino acids and derivatives
	T459_00606	4072.A0A2G3AES2	COMPARTMENTS	GOCC:0005622	Intracellular
	T459_00606	4072.A0A2G3AES2	COMPARTMENTS	GOCC:0005737	Cytoplasm
	T459_00606	4072.A0A2G3AES2	COMPARTMENTS	GOCC:0009507	Chloroplast
	T459_00606	4072.A0A2G3AES2	COMPARTMENTS	GOCC:0009536	Plastid
	T459_00606	4072.A0A2G3AES2	COMPARTMENTS	GOCC:0043226	Organelle
	T459_00606	4072.A0A2G3AES2	COMPARTMENTS	GOCC:0043227	Membrane-bounded organelle
	T459_00606	4072.A0A2G3AES2	COMPARTMENTS	GOCC:0043229	Intracellular organelle
	T459_00606	4072.A0A2G3AES2	COMPARTMENTS	GOCC:0043231	Intracellular membrane-bounded organelle
	T459_00606	4072.A0A2G3AES2	COMPARTMENTS	GOCC:0110165	Cellular anatomical entity
	T459_00606	4072.A0A2G3AES2	Pfam	PF01168	Alanine racemase, N-terminal domain
	T459_00606	4072.A0A2G3AES2	InterPro	IPR000183	Ornithine/DAP/Arg decarboxylase
	T459_00606	4072.A0A2G3AES2	InterPro	IPR002986	Diaminopimelate decarboxylase, LysA
	T459_00606	4072.A0A2G3AES2	InterPro	IPR009006	Alanine racemase/group IV decarboxylase, C-terminal
	T459_00606	4072.A0A2G3AES2	InterPro	IPR022643	Orn/DAP/Arg decarboxylase 2, C-terminal
	T459_00606	4072.A0A2G3AES2	InterPro	IPR022644	Orn/DAP/Arg decarboxylase 2, N-terminal
	T459_00606	4072.A0A2G3AES2	InterPro	IPR022653	Orn/DAP/Arg decarboxylase 2, pyridoxal-phosphate binding site
	T459_00606	4072.A0A2G3AES2	InterPro	IPR022657	Orn/DAP/Arg decarboxylase 2, conserved site
	T459_00606	4072.A0A2G3AES2	InterPro	IPR029066	PLP-binding barrel
	T459_01958	4072.A0A2G3AIJ7	GO Process	GO:0005975	Carbohydrate metabolic process
	T459_01958	4072.A0A2G3AIJ7	GO Process	GO:0006040	Amino sugar metabolic process
	T459_01958	4072.A0A2G3AIJ7	GO Process	GO:0006629	Lipid metabolic process
	T459_01958	4072.A0A2G3AIJ7	GO Process	GO:0006643	Membrane lipid metabolic process
	T459_01958	4072.A0A2G3AIJ7	GO Process	GO:0006644	Phospholipid metabolic process
	T459_01958	4072.A0A2G3AIJ7	GO Process	GO:0006664	Glycolipid metabolic process
	T459_01958	4072.A0A2G3AIJ7	GO Process	GO:0006793	Phosphorus metabolic process
	T459_01958	4072.A0A2G3AIJ7	GO Process	GO:0006796	Phosphate-containing compound metabolic process
	T459_01958	4072.A0A2G3AIJ7	GO Process	GO:0008152	Metabolic process
	T459_01958	4072.A0A2G3AIJ7	GO Process	GO:0008610	Lipid biosynthetic process
	T459_01958	4072.A0A2G3AIJ7	GO Process	GO:0008654	Phospholipid biosynthetic process
	T459_01958	4072.A0A2G3AIJ7	GO Process	GO:0009058	Biosynthetic process
	T459_01958	4072.A0A2G3AIJ7	GO Process	GO:0009245	Lipid A biosynthetic process
	T459_01958	4072.A0A2G3AIJ7	GO Process	GO:0009247	Glycolipid biosynthetic process
	T459_01958	4072.A0A2G3AIJ7	GO Process	GO:0009311	Oligosaccharide metabolic process
	T459_01958	4072.A0A2G3AIJ7	GO Process	GO:0009312	Oligosaccharide biosynthetic process
	T459_01958	4072.A0A2G3AIJ7	GO Process	GO:0009987	Cellular process
	T459_01958	4072.A0A2G3AIJ7	GO Process	GO:0016051	Carbohydrate biosynthetic process
	T459_01958	4072.A0A2G3AIJ7	GO Process	GO:0019637	Organophosphate metabolic process
	T459_01958	4072.A0A2G3AIJ7	GO Process	GO:0044237	Cellular metabolic process
	T459_01958	4072.A0A2G3AIJ7	GO Process	GO:0044238	Primary metabolic process
	T459_01958	4072.A0A2G3AIJ7	GO Process	GO:0044249	Cellular biosynthetic process
	T459_01958	4072.A0A2G3AIJ7	GO Process	GO:0044255	Cellular lipid metabolic process
	T459_01958	4072.A0A2G3AIJ7	GO Process	GO:0046467	Membrane lipid biosynthetic process
	T459_01958	4072.A0A2G3AIJ7	GO Process	GO:0046493	Lipid A metabolic process
	T459_01958	4072.A0A2G3AIJ7	GO Process	GO:0071704	Organic substance metabolic process
	T459_01958	4072.A0A2G3AIJ7	GO Process	GO:0090407	Organophosphate biosynthetic process
	T459_01958	4072.A0A2G3AIJ7	GO Process	GO:1901135	Carbohydrate derivative metabolic process
	T459_01958	4072.A0A2G3AIJ7	GO Process	GO:1901137	Carbohydrate derivative biosynthetic process
	T459_01958	4072.A0A2G3AIJ7	GO Process	GO:1901269	Lipooligosaccharide metabolic process
	T459_01958	4072.A0A2G3AIJ7	GO Process	GO:1901271	Lipooligosaccharide biosynthetic process
	T459_01958	4072.A0A2G3AIJ7	GO Process	GO:1901576	Organic substance biosynthetic process
	T459_01958	4072.A0A2G3AIJ7	GO Process	GO:1903509	Liposaccharide metabolic process
	T459_01958	4072.A0A2G3AIJ7	GO Function	GO:0003824	Catalytic activity
	T459_01958	4072.A0A2G3AIJ7	GO Function	GO:0005488	Binding
	T459_01958	4072.A0A2G3AIJ7	GO Function	GO:0008759	UDP-3-O-[3-hydroxymyristoyl] N-acetylglucosamine deacetylase activity
	T459_01958	4072.A0A2G3AIJ7	GO Function	GO:0016787	Hydrolase activity
	T459_01958	4072.A0A2G3AIJ7	GO Function	GO:0016810	Hydrolase activity, acting on carbon-nitrogen (but not peptide) bonds
	T459_01958	4072.A0A2G3AIJ7	GO Function	GO:0016811	Hydrolase activity, acting on carbon-nitrogen (but not peptide) bonds, in linear amides
	T459_01958	4072.A0A2G3AIJ7	GO Function	GO:0019213	Deacetylase activity
	T459_01958	4072.A0A2G3AIJ7	GO Function	GO:0043167	Ion binding
	T459_01958	4072.A0A2G3AIJ7	GO Function	GO:0043169	Cation binding
	T459_01958	4072.A0A2G3AIJ7	GO Function	GO:0046872	Metal ion binding
	T459_01958	4072.A0A2G3AIJ7	GO Function	GO:0103117	UDP-3-O-acyl-N-acetylglucosamine deacetylase activity
	T459_01958	4072.A0A2G3AIJ7	GO Component	GO:0005622	Intracellular anatomical structure
	T459_01958	4072.A0A2G3AIJ7	GO Component	GO:0005737	Cytoplasm
	T459_01958	4072.A0A2G3AIJ7	GO Component	GO:0005739	Mitochondrion
	T459_01958	4072.A0A2G3AIJ7	GO Component	GO:0043226	Organelle
	T459_01958	4072.A0A2G3AIJ7	GO Component	GO:0043227	Membrane-bounded organelle
	T459_01958	4072.A0A2G3AIJ7	GO Component	GO:0043229	Intracellular organelle
	T459_01958	4072.A0A2G3AIJ7	GO Component	GO:0043231	Intracellular membrane-bounded organelle
	T459_01958	4072.A0A2G3AIJ7	GO Component	GO:0110165	Cellular anatomical entity
	T459_01958	4072.A0A2G3AIJ7	STRING clusters	CL:15895	Mixed, incl. Protein lipoylation, and Lipid A metabolic process
	T459_01958	4072.A0A2G3AIJ7	STRING clusters	CL:15896	Mixed, incl. Lipid A metabolic process, and Lipid glycosylation
	T459_01958	4072.A0A2G3AIJ7	STRING clusters	CL:15898	Lipid A metabolic process, and Acylneuraminate cytidylyltransferase
	T459_01958	4072.A0A2G3AIJ7	KEGG	cann01100	Metabolic pathways
	T459_01958	4072.A0A2G3AIJ7	COMPARTMENTS	GOCC:0005622	Intracellular
	T459_01958	4072.A0A2G3AIJ7	COMPARTMENTS	GOCC:0005737	Cytoplasm
	T459_01958	4072.A0A2G3AIJ7	COMPARTMENTS	GOCC:0005739	Mitochondrion
	T459_01958	4072.A0A2G3AIJ7	COMPARTMENTS	GOCC:0043226	Organelle
	T459_01958	4072.A0A2G3AIJ7	COMPARTMENTS	GOCC:0043227	Membrane-bounded organelle
	T459_01958	4072.A0A2G3AIJ7	COMPARTMENTS	GOCC:0043229	Intracellular organelle
	T459_01958	4072.A0A2G3AIJ7	COMPARTMENTS	GOCC:0043231	Intracellular membrane-bounded organelle
	T459_01958	4072.A0A2G3AIJ7	COMPARTMENTS	GOCC:0110165	Cellular anatomical entity
	T459_01958	4072.A0A2G3AIJ7	Pfam	PF03331	UDP-3-O-acyl N-acetylglycosamine deacetylase
	T459_01958	4072.A0A2G3AIJ7	InterPro	IPR004463	UDP-3-O-acyl N-acetylglucosamine deacetylase
	T459_01958	4072.A0A2G3AIJ7	InterPro	IPR011334	UDP-3-O-acyl N-acetylglucosamine deacetylase, C-terminal
	T459_01958	4072.A0A2G3AIJ7	InterPro	IPR015870	UDP-3-O-acyl N-acetylglucosamine deacetylase, N-terminal
	T459_01958	4072.A0A2G3AIJ7	InterPro	IPR020568	Ribosomal protein S5 domain 2-type fold
	T459_02231	4072.A0A1U8H694	GO Process	GO:0000291	Nuclear-transcribed mRNA catabolic process, exonucleolytic
	T459_02231	4072.A0A1U8H694	GO Process	GO:0000956	Nuclear-transcribed mRNA catabolic process
	T459_02231	4072.A0A1U8H694	GO Process	GO:0006139	Nucleobase-containing compound metabolic process
	T459_02231	4072.A0A1U8H694	GO Process	GO:0006364	rRNA processing
	T459_02231	4072.A0A1U8H694	GO Process	GO:0006396	RNA processing
	T459_02231	4072.A0A1U8H694	GO Process	GO:0006401	RNA catabolic process
	T459_02231	4072.A0A1U8H694	GO Process	GO:0006402	mRNA catabolic process
	T459_02231	4072.A0A1U8H694	GO Process	GO:0006725	Cellular aromatic compound metabolic process
	T459_02231	4072.A0A1U8H694	GO Process	GO:0006807	Nitrogen compound metabolic process
	T459_02231	4072.A0A1U8H694	GO Process	GO:0007275	Multicellular organism development
	T459_02231	4072.A0A1U8H694	GO Process	GO:0008152	Metabolic process
	T459_02231	4072.A0A1U8H694	GO Process	GO:0009056	Catabolic process
	T459_02231	4072.A0A1U8H694	GO Process	GO:0009057	Macromolecule catabolic process
	T459_02231	4072.A0A1U8H694	GO Process	GO:0009791	Post-embryonic development
	T459_02231	4072.A0A1U8H694	GO Process	GO:0009845	Seed germination
	T459_02231	4072.A0A1U8H694	GO Process	GO:0009892	Negative regulation of metabolic process
	T459_02231	4072.A0A1U8H694	GO Process	GO:0009987	Cellular process
	T459_02231	4072.A0A1U8H694	GO Process	GO:0010467	Gene expression
	T459_02231	4072.A0A1U8H694	GO Process	GO:0010468	Regulation of gene expression
	T459_02231	4072.A0A1U8H694	GO Process	GO:0010605	Negative regulation of macromolecule metabolic process
	T459_02231	4072.A0A1U8H694	GO Process	GO:0010629	Negative regulation of gene expression
	T459_02231	4072.A0A1U8H694	GO Process	GO:0016070	RNA metabolic process
	T459_02231	4072.A0A1U8H694	GO Process	GO:0016071	mRNA metabolic process
	T459_02231	4072.A0A1U8H694	GO Process	GO:0016072	rRNA metabolic process
	T459_02231	4072.A0A1U8H694	GO Process	GO:0016073	snRNA metabolic process
	T459_02231	4072.A0A1U8H694	GO Process	GO:0016074	sno(s)RNA metabolic process
	T459_02231	4072.A0A1U8H694	GO Process	GO:0016075	rRNA catabolic process
	T459_02231	4072.A0A1U8H694	GO Process	GO:0016180	snRNA processing
	T459_02231	4072.A0A1U8H694	GO Process	GO:0019222	Regulation of metabolic process
	T459_02231	4072.A0A1U8H694	GO Process	GO:0019439	Aromatic compound catabolic process
	T459_02231	4072.A0A1U8H694	GO Process	GO:0022613	Ribonucleoprotein complex biogenesis
	T459_02231	4072.A0A1U8H694	GO Process	GO:0031123	RNA 3-end processing
	T459_02231	4072.A0A1U8H694	GO Process	GO:0031126	sno(s)RNA 3-end processing
	T459_02231	4072.A0A1U8H694	GO Process	GO:0032501	Multicellular organismal process
	T459_02231	4072.A0A1U8H694	GO Process	GO:0032502	Developmental process
	T459_02231	4072.A0A1U8H694	GO Process	GO:0034427	Nuclear-transcribed mRNA catabolic process, exonucleolytic, 3-5
	T459_02231	4072.A0A1U8H694	GO Process	GO:0034470	ncRNA processing
	T459_02231	4072.A0A1U8H694	GO Process	GO:0034472	snRNA 3-end processing
	T459_02231	4072.A0A1U8H694	GO Process	GO:0034475	U4 snRNA 3-end processing
	T459_02231	4072.A0A1U8H694	GO Process	GO:0034641	Cellular nitrogen compound metabolic process
	T459_02231	4072.A0A1U8H694	GO Process	GO:0034655	Nucleobase-containing compound catabolic process
	T459_02231	4072.A0A1U8H694	GO Process	GO:0034660	ncRNA metabolic process
	T459_02231	4072.A0A1U8H694	GO Process	GO:0034661	ncRNA catabolic process
	T459_02231	4072.A0A1U8H694	GO Process	GO:0042254	Ribosome biogenesis
	T459_02231	4072.A0A1U8H694	GO Process	GO:0043144	sno(s)RNA processing
	T459_02231	4072.A0A1U8H694	GO Process	GO:0043170	Macromolecule metabolic process
	T459_02231	4072.A0A1U8H694	GO Process	GO:0043628	Small regulatory ncRNA 3-end processing
	T459_02231	4072.A0A1U8H694	GO Process	GO:0044085	Cellular component biogenesis
	T459_02231	4072.A0A1U8H694	GO Process	GO:0044237	Cellular metabolic process
	T459_02231	4072.A0A1U8H694	GO Process	GO:0044238	Primary metabolic process
	T459_02231	4072.A0A1U8H694	GO Process	GO:0044248	Cellular catabolic process
	T459_02231	4072.A0A1U8H694	GO Process	GO:0044260	Cellular macromolecule metabolic process
	T459_02231	4072.A0A1U8H694	GO Process	GO:0044265	Cellular macromolecule catabolic process
	T459_02231	4072.A0A1U8H694	GO Process	GO:0044270	Cellular nitrogen compound catabolic process
	T459_02231	4072.A0A1U8H694	GO Process	GO:0046483	Heterocycle metabolic process
	T459_02231	4072.A0A1U8H694	GO Process	GO:0046700	Heterocycle catabolic process
	T459_02231	4072.A0A1U8H694	GO Process	GO:0048519	Negative regulation of biological process
	T459_02231	4072.A0A1U8H694	GO Process	GO:0048856	Anatomical structure development
	T459_02231	4072.A0A1U8H694	GO Process	GO:0050789	Regulation of biological process
	T459_02231	4072.A0A1U8H694	GO Process	GO:0060255	Regulation of macromolecule metabolic process
	T459_02231	4072.A0A1U8H694	GO Process	GO:0065007	Biological regulation
	T459_02231	4072.A0A1U8H694	GO Process	GO:0071025	RNA surveillance
	T459_02231	4072.A0A1U8H694	GO Process	GO:0071027	Nuclear RNA surveillance
	T459_02231	4072.A0A1U8H694	GO Process	GO:0071028	Nuclear mRNA surveillance
	T459_02231	4072.A0A1U8H694	GO Process	GO:0071051	Polyadenylation-dependent snoRNA 3-end processing
	T459_02231	4072.A0A1U8H694	GO Process	GO:0071704	Organic substance metabolic process
	T459_02231	4072.A0A1U8H694	GO Process	GO:0071840	Cellular component organization or biogenesis
	T459_02231	4072.A0A1U8H694	GO Process	GO:0090304	Nucleic acid metabolic process
	T459_02231	4072.A0A1U8H694	GO Process	GO:0090305	Nucleic acid phosphodiester bond hydrolysis
	T459_02231	4072.A0A1U8H694	GO Process	GO:0090351	Seedling development
	T459_02231	4072.A0A1U8H694	GO Process	GO:1901360	Organic cyclic compound metabolic process
	T459_02231	4072.A0A1U8H694	GO Process	GO:1901361	Organic cyclic compound catabolic process
	T459_02231	4072.A0A1U8H694	GO Process	GO:1901575	Organic substance catabolic process
	T459_02231	4072.A0A1U8H694	GO Function	GO:0003676	Nucleic acid binding
	T459_02231	4072.A0A1U8H694	GO Function	GO:0003723	RNA binding
	T459_02231	4072.A0A1U8H694	GO Function	GO:0003824	Catalytic activity
	T459_02231	4072.A0A1U8H694	GO Function	GO:0004518	Nuclease activity
	T459_02231	4072.A0A1U8H694	GO Function	GO:0004527	Exonuclease activity
	T459_02231	4072.A0A1U8H694	GO Function	GO:0005488	Binding
	T459_02231	4072.A0A1U8H694	GO Function	GO:0008408	3-5 exonuclease activity
	T459_02231	4072.A0A1U8H694	GO Function	GO:0016787	Hydrolase activity
	T459_02231	4072.A0A1U8H694	GO Function	GO:0016788	Hydrolase activity, acting on ester bonds
	T459_02231	4072.A0A1U8H694	GO Function	GO:0097159	Organic cyclic compound binding
	T459_02231	4072.A0A1U8H694	GO Function	GO:1901363	Heterocyclic compound binding
	T459_02231	4072.A0A1U8H694	GO Component	GO:0000176	Nuclear exosome (RNase complex)
	T459_02231	4072.A0A1U8H694	GO Component	GO:0000177	Cytoplasmic exosome (RNase complex)
	T459_02231	4072.A0A1U8H694	GO Component	GO:0000178	Exosome (RNase complex)
	T459_02231	4072.A0A1U8H694	GO Component	GO:0005622	Intracellular anatomical structure
	T459_02231	4072.A0A1U8H694	GO Component	GO:0005634	Nucleus
	T459_02231	4072.A0A1U8H694	GO Component	GO:0005730	Nucleolus
	T459_02231	4072.A0A1U8H694	GO Component	GO:0005737	Cytoplasm
	T459_02231	4072.A0A1U8H694	GO Component	GO:0031974	Membrane-enclosed lumen
	T459_02231	4072.A0A1U8H694	GO Component	GO:0031981	Nuclear lumen
	T459_02231	4072.A0A1U8H694	GO Component	GO:0032991	Protein-containing complex
	T459_02231	4072.A0A1U8H694	GO Component	GO:0043226	Organelle
	T459_02231	4072.A0A1U8H694	GO Component	GO:0043227	Membrane-bounded organelle
	T459_02231	4072.A0A1U8H694	GO Component	GO:0043228	Non-membrane-bounded organelle
	T459_02231	4072.A0A1U8H694	GO Component	GO:0043229	Intracellular organelle
	T459_02231	4072.A0A1U8H694	GO Component	GO:0043231	Intracellular membrane-bounded organelle
	T459_02231	4072.A0A1U8H694	GO Component	GO:0043232	Intracellular non-membrane-bounded organelle
	T459_02231	4072.A0A1U8H694	GO Component	GO:0043233	Organelle lumen
	T459_02231	4072.A0A1U8H694	GO Component	GO:0070013	Intracellular organelle lumen
	T459_02231	4072.A0A1U8H694	GO Component	GO:0110165	Cellular anatomical entity
	T459_02231	4072.A0A1U8H694	GO Component	GO:0140513	Nuclear protein-containing complex
	T459_02231	4072.A0A1U8H694	GO Component	GO:1902494	Catalytic complex
	T459_02231	4072.A0A1U8H694	GO Component	GO:1905354	Exoribonuclease complex
	T459_02231	4072.A0A1U8H694	STRING clusters	CL:2701	Small-subunit processome, and mRNA decay by 3 to 5 exoribonuclease
	T459_02231	4072.A0A1U8H694	STRING clusters	CL:2933	mRNA decay by 3 to 5 exoribonuclease, and snRNA catabolic process
	T459_02231	4072.A0A1U8H694	STRING clusters	CL:2936	Exosome (RNase complex)
	T459_02231	4072.A0A1U8H694	KEGG	cann03018	RNA degradation
	T459_02231	4072.A0A1U8H694	Reactome	MAP-429914	Deadenylation-dependent mRNA decay
	T459_02231	4072.A0A1U8H694	Reactome	MAP-429958	mRNA decay by 3 to 5 exoribonuclease
	T459_02231	4072.A0A1U8H694	Reactome	MAP-450385	Butyrate Response Factor 1 (BRF1) binds and destabilizes mRNA
	T459_02231	4072.A0A1U8H694	Reactome	MAP-450513	Tristetraprolin (TTP, ZFP36) binds and destabilizes mRNA
	T459_02231	4072.A0A1U8H694	Reactome	MAP-450531	Regulation of mRNA stability by proteins that bind AU-rich elements
	T459_02231	4072.A0A1U8H694	Reactome	MAP-6791226	Major pathway of rRNA processing in the nucleolus and cytosol
	T459_02231	4072.A0A1U8H694	Reactome	MAP-72312	rRNA processing
	T459_02231	4072.A0A1U8H694	Reactome	MAP-8868773	rRNA processing in the nucleus and cytosol
	T459_02231	4072.A0A1U8H694	Reactome	MAP-8953854	Metabolism of RNA
	T459_02231	4072.A0A1U8H694	COMPARTMENTS	GOCC:0000176	Nuclear exosome (RNase complex)
	T459_02231	4072.A0A1U8H694	COMPARTMENTS	GOCC:0000177	Cytoplasmic exosome (RNase complex)
	T459_02231	4072.A0A1U8H694	COMPARTMENTS	GOCC:0000178	Exosome (RNase complex)
	T459_02231	4072.A0A1U8H694	COMPARTMENTS	GOCC:0005622	Intracellular
	T459_02231	4072.A0A1U8H694	COMPARTMENTS	GOCC:0005634	Nucleus
	T459_02231	4072.A0A1U8H694	COMPARTMENTS	GOCC:0005737	Cytoplasm
	T459_02231	4072.A0A1U8H694	COMPARTMENTS	GOCC:0031974	Membrane-enclosed lumen
	T459_02231	4072.A0A1U8H694	COMPARTMENTS	GOCC:0031981	Nuclear lumen
	T459_02231	4072.A0A1U8H694	COMPARTMENTS	GOCC:0032991	Protein-containing complex
	T459_02231	4072.A0A1U8H694	COMPARTMENTS	GOCC:0043226	Organelle
	T459_02231	4072.A0A1U8H694	COMPARTMENTS	GOCC:0043227	Membrane-bounded organelle
	T459_02231	4072.A0A1U8H694	COMPARTMENTS	GOCC:0043229	Intracellular organelle
	T459_02231	4072.A0A1U8H694	COMPARTMENTS	GOCC:0043231	Intracellular membrane-bounded organelle
	T459_02231	4072.A0A1U8H694	COMPARTMENTS	GOCC:0043233	Organelle lumen
	T459_02231	4072.A0A1U8H694	COMPARTMENTS	GOCC:0070013	Intracellular organelle lumen
	T459_02231	4072.A0A1U8H694	COMPARTMENTS	GOCC:0110165	Cellular anatomical entity
	T459_02231	4072.A0A1U8H694	COMPARTMENTS	GOCC:1902494	Catalytic complex
	T459_02231	4072.A0A1U8H694	COMPARTMENTS	GOCC:1905354	Exoribonuclease complex
	T459_02231	4072.A0A1U8H694	Pfam	PF01138	3 exoribonuclease family, domain 1
	T459_02231	4072.A0A1U8H694	Pfam	PF03725	3 exoribonuclease family, domain 2
	T459_02231	4072.A0A1U8H694	InterPro	IPR001247	Exoribonuclease, phosphorolytic domain 1
	T459_02231	4072.A0A1U8H694	InterPro	IPR015847	Exoribonuclease, phosphorolytic domain 2
	T459_02231	4072.A0A1U8H694	InterPro	IPR020568	Ribosomal protein S5 domain 2-type fold
	T459_02231	4072.A0A1U8H694	InterPro	IPR027408	PNPase/RNase PH domain superfamily
	T459_02231	4072.A0A1U8H694	InterPro	IPR036345	Exoribonuclease, PH domain 2 superfamily
	T459_03229	4072.A0A1U8F0K6	GO Process	GO:0008152	Metabolic process
	T459_03229	4072.A0A1U8F0K6	GO Process	GO:0009987	Cellular process
	T459_03229	4072.A0A1U8F0K6	GO Process	GO:0044237	Cellular metabolic process
	T459_03229	4072.A0A1U8F0K6	GO Process	GO:0044238	Primary metabolic process
	T459_03229	4072.A0A1U8F0K6	GO Process	GO:0071704	Organic substance metabolic process
	T459_03229	4072.A0A1U8F0K6	GO Function	GO:0003676	Nucleic acid binding
	T459_03229	4072.A0A1U8F0K6	GO Function	GO:0003723	RNA binding
	T459_03229	4072.A0A1U8F0K6	GO Function	GO:0003729	mRNA binding
	T459_03229	4072.A0A1U8F0K6	GO Function	GO:0005488	Binding
	T459_03229	4072.A0A1U8F0K6	GO Function	GO:0097159	Organic cyclic compound binding
	T459_03229	4072.A0A1U8F0K6	GO Function	GO:1901363	Heterocyclic compound binding
	T459_03229	4072.A0A1U8F0K6	GO Component	GO:0005622	Intracellular anatomical structure
	T459_03229	4072.A0A1U8F0K6	GO Component	GO:0005737	Cytoplasm
	T459_03229	4072.A0A1U8F0K6	GO Component	GO:0005739	Mitochondrion
	T459_03229	4072.A0A1U8F0K6	GO Component	GO:0009507	Chloroplast
	T459_03229	4072.A0A1U8F0K6	GO Component	GO:0009536	Plastid
	T459_03229	4072.A0A1U8F0K6	GO Component	GO:0043226	Organelle
	T459_03229	4072.A0A1U8F0K6	GO Component	GO:0043227	Membrane-bounded organelle
	T459_03229	4072.A0A1U8F0K6	GO Component	GO:0043229	Intracellular organelle
	T459_03229	4072.A0A1U8F0K6	GO Component	GO:0043231	Intracellular membrane-bounded organelle
	T459_03229	4072.A0A1U8F0K6	GO Component	GO:0110165	Cellular anatomical entity
	T459_03229	4072.A0A1U8F0K6	STRING clusters	CL:58874	Pentatricopeptide repeat domain, and Gamma-tubulin complex
	T459_03229	4072.A0A1U8F0K6	STRING clusters	CL:59168	Mixed, incl. Pentacotripeptide-repeat region of PRORP, and Small MutS-related domain
	T459_03229	4072.A0A1U8F0K6	STRING clusters	CL:59236	Mostly uncharacterized, incl. Pentatricopeptide repeat-containing protein PPR5-like, and Pentatricopeptide repeat-containing protein At1g15510-like
	T459_03229	4072.A0A1U8F0K6	STRING clusters	CL:59238	Mixed, incl. Pentatricopeptide repeat-containing protein At1g15510-like, and Cytidine to uridine editing
	T459_03229	4072.A0A1U8F0K6	COMPARTMENTS	GOCC:0005622	Intracellular
	T459_03229	4072.A0A1U8F0K6	COMPARTMENTS	GOCC:0005737	Cytoplasm
	T459_03229	4072.A0A1U8F0K6	COMPARTMENTS	GOCC:0009507	Chloroplast
	T459_03229	4072.A0A1U8F0K6	COMPARTMENTS	GOCC:0009536	Plastid
	T459_03229	4072.A0A1U8F0K6	COMPARTMENTS	GOCC:0043226	Organelle
	T459_03229	4072.A0A1U8F0K6	COMPARTMENTS	GOCC:0043227	Membrane-bounded organelle
	T459_03229	4072.A0A1U8F0K6	COMPARTMENTS	GOCC:0043229	Intracellular organelle
	T459_03229	4072.A0A1U8F0K6	COMPARTMENTS	GOCC:0043231	Intracellular membrane-bounded organelle
	T459_03229	4072.A0A1U8F0K6	COMPARTMENTS	GOCC:0110165	Cellular anatomical entity
	T459_03229	4072.A0A1U8F0K6	Pfam	PF01535	PPR repeat
	T459_03229	4072.A0A1U8F0K6	Pfam	PF13812	Pentatricopeptide repeat domain
	T459_03229	4072.A0A1U8F0K6	InterPro	IPR002885	Pentatricopeptide repeat
	T459_03229	4072.A0A1U8F0K6	InterPro	IPR011990	Tetratricopeptide-like helical domain superfamily
	T459_03756	4072.A0A1U8EQI3	GO Process	GO:0006518	Peptide metabolic process
	T459_03756	4072.A0A1U8EQI3	GO Process	GO:0006575	Cellular modified amino acid metabolic process
	T459_03756	4072.A0A1U8EQI3	GO Process	GO:0006749	Glutathione metabolic process
	T459_03756	4072.A0A1U8EQI3	GO Process	GO:0006751	Glutathione catabolic process
	T459_03756	4072.A0A1U8EQI3	GO Process	GO:0006790	Sulfur compound metabolic process
	T459_03756	4072.A0A1U8EQI3	GO Process	GO:0006807	Nitrogen compound metabolic process
	T459_03756	4072.A0A1U8EQI3	GO Process	GO:0008152	Metabolic process
	T459_03756	4072.A0A1U8EQI3	GO Process	GO:0009056	Catabolic process
	T459_03756	4072.A0A1U8EQI3	GO Process	GO:0009987	Cellular process
	T459_03756	4072.A0A1U8EQI3	GO Process	GO:0010035	Response to inorganic substance
	T459_03756	4072.A0A1U8EQI3	GO Process	GO:0010038	Response to metal ion
	T459_03756	4072.A0A1U8EQI3	GO Process	GO:0010288	Response to lead ion
	T459_03756	4072.A0A1U8EQI3	GO Process	GO:0034641	Cellular nitrogen compound metabolic process
	T459_03756	4072.A0A1U8EQI3	GO Process	GO:0042219	Cellular modified amino acid catabolic process
	T459_03756	4072.A0A1U8EQI3	GO Process	GO:0042221	Response to chemical
	T459_03756	4072.A0A1U8EQI3	GO Process	GO:0043171	Peptide catabolic process
	T459_03756	4072.A0A1U8EQI3	GO Process	GO:0043603	Cellular amide metabolic process
	T459_03756	4072.A0A1U8EQI3	GO Process	GO:0044237	Cellular metabolic process
	T459_03756	4072.A0A1U8EQI3	GO Process	GO:0044248	Cellular catabolic process
	T459_03756	4072.A0A1U8EQI3	GO Process	GO:0044273	Sulfur compound catabolic process
	T459_03756	4072.A0A1U8EQI3	GO Process	GO:0046686	Response to cadmium ion
	T459_03756	4072.A0A1U8EQI3	GO Process	GO:0050896	Response to stimulus
	T459_03756	4072.A0A1U8EQI3	GO Process	GO:0071704	Organic substance metabolic process
	T459_03756	4072.A0A1U8EQI3	GO Process	GO:1901564	Organonitrogen compound metabolic process
	T459_03756	4072.A0A1U8EQI3	GO Process	GO:1901565	Organonitrogen compound catabolic process
	T459_03756	4072.A0A1U8EQI3	GO Process	GO:1901575	Organic substance catabolic process
	T459_03756	4072.A0A1U8EQI3	GO Function	GO:0003824	Catalytic activity
	T459_03756	4072.A0A1U8EQI3	GO Function	GO:0003839	Gamma-glutamylcyclotransferase activity
	T459_03756	4072.A0A1U8EQI3	GO Function	GO:0016829	Lyase activity
	T459_03756	4072.A0A1U8EQI3	GO Function	GO:0016840	Carbon-nitrogen lyase activity
	T459_03756	4072.A0A1U8EQI3	GO Function	GO:0016842	Amidine-lyase activity
	T459_03756	4072.A0A1U8EQI3	GO Component	GO:0005622	Intracellular anatomical structure
	T459_03756	4072.A0A1U8EQI3	GO Component	GO:0005737	Cytoplasm
	T459_03756	4072.A0A1U8EQI3	GO Component	GO:0110165	Cellular anatomical entity
	T459_03756	4072.A0A1U8EQI3	STRING clusters	CL:19007	Glutathione metabolism, and L-ascorbic acid biosynthetic process
	T459_03756	4072.A0A1U8EQI3	STRING clusters	CL:19008	Glutathione metabolism, and L-ascorbic acid biosynthetic process
	T459_03756	4072.A0A1U8EQI3	STRING clusters	CL:19009	Glutathione metabolism, and L-ascorbic acid biosynthetic process
	T459_03756	4072.A0A1U8EQI3	STRING clusters	CL:19011	Glutathione metabolism, and L-ascorbic acid biosynthetic process
	T459_03756	4072.A0A1U8EQI3	STRING clusters	CL:19012	Glutathione metabolism
	T459_03756	4072.A0A1U8EQI3	STRING clusters	CL:19013	Glutathione metabolism
	T459_03756	4072.A0A1U8EQI3	STRING clusters	CL:19018	Glutathione metabolism
	T459_03756	4072.A0A1U8EQI3	STRING clusters	CL:19023	Glutathione metabolism
	T459_03756	4072.A0A1U8EQI3	STRING clusters	CL:19028	Glutathione metabolism
	T459_03756	4072.A0A1U8EQI3	STRING clusters	CL:19033	Glutathione metabolism
	T459_03756	4072.A0A1U8EQI3	STRING clusters	CL:19038	Glutathione metabolism
	T459_03756	4072.A0A1U8EQI3	STRING clusters	CL:19043	Glutathione metabolism
	T459_03756	4072.A0A1U8EQI3	STRING clusters	CL:19048	Glutathione metabolism
	T459_03756	4072.A0A1U8EQI3	KEGG	cann00480	Glutathione metabolism
	T459_03756	4072.A0A1U8EQI3	KEGG	cann01100	Metabolic pathways
	T459_03756	4072.A0A1U8EQI3	Reactome	MAP-1430728	Metabolism
	T459_03756	4072.A0A1U8EQI3	Reactome	MAP-156580	Phase II - Conjugation of compounds
	T459_03756	4072.A0A1U8EQI3	Reactome	MAP-156590	Glutathione conjugation
	T459_03756	4072.A0A1U8EQI3	Reactome	MAP-174403	Glutathione synthesis and recycling
	T459_03756	4072.A0A1U8EQI3	Reactome	MAP-211859	Biological oxidations
	T459_03756	4072.A0A1U8EQI3	COMPARTMENTS	GOCC:0005622	Intracellular
	T459_03756	4072.A0A1U8EQI3	COMPARTMENTS	GOCC:0005737	Cytoplasm
	T459_03756	4072.A0A1U8EQI3	COMPARTMENTS	GOCC:0110165	Cellular anatomical entity
	T459_03756	4072.A0A1U8EQI3	Pfam	PF04752	ChaC-like protein
	T459_03756	4072.A0A1U8EQI3	InterPro	IPR006840	Glutathione-specific gamma-glutamylcyclotransferase
	T459_03756	4072.A0A1U8EQI3	InterPro	IPR013024	Gamma-glutamyl cyclotransferase-like
	T459_03756	4072.A0A1U8EQI3	InterPro	IPR036568	Gamma-glutamyl cyclotransferase-like superfamily
	T459_05146	4072.A0A2G3A767	GO Process	GO:0007049	Cell cycle
	T459_05146	4072.A0A2G3A767	GO Process	GO:0007275	Multicellular organism development
	T459_05146	4072.A0A2G3A767	GO Process	GO:0009653	Anatomical structure morphogenesis
	T459_05146	4072.A0A2G3A767	GO Process	GO:0009719	Response to endogenous stimulus
	T459_05146	4072.A0A2G3A767	GO Process	GO:0009725	Response to hormone
	T459_05146	4072.A0A2G3A767	GO Process	GO:0009733	Response to auxin
	T459_05146	4072.A0A2G3A767	GO Process	GO:0009791	Post-embryonic development
	T459_05146	4072.A0A2G3A767	GO Process	GO:0009987	Cellular process
	T459_05146	4072.A0A2G3A767	GO Process	GO:0010015	Root morphogenesis
	T459_05146	4072.A0A2G3A767	GO Process	GO:0010033	Response to organic substance
	T459_05146	4072.A0A2G3A767	GO Process	GO:0010101	Post-embryonic root morphogenesis
	T459_05146	4072.A0A2G3A767	GO Process	GO:0010102	Lateral root morphogenesis
	T459_05146	4072.A0A2G3A767	GO Process	GO:0022622	Root system development
	T459_05146	4072.A0A2G3A767	GO Process	GO:0032501	Multicellular organismal process
	T459_05146	4072.A0A2G3A767	GO Process	GO:0032502	Developmental process
	T459_05146	4072.A0A2G3A767	GO Process	GO:0042221	Response to chemical
	T459_05146	4072.A0A2G3A767	GO Process	GO:0048364	Root development
	T459_05146	4072.A0A2G3A767	GO Process	GO:0048527	Lateral root development
	T459_05146	4072.A0A2G3A767	GO Process	GO:0048528	Post-embryonic root development
	T459_05146	4072.A0A2G3A767	GO Process	GO:0048731	System development
	T459_05146	4072.A0A2G3A767	GO Process	GO:0048856	Anatomical structure development
	T459_05146	4072.A0A2G3A767	GO Process	GO:0050896	Response to stimulus
	T459_05146	4072.A0A2G3A767	GO Process	GO:0051301	Cell division
	T459_05146	4072.A0A2G3A767	GO Process	GO:0090696	Post-embryonic plant organ development
	T459_05146	4072.A0A2G3A767	GO Process	GO:0090697	Post-embryonic plant organ morphogenesis
	T459_05146	4072.A0A2G3A767	GO Process	GO:0090698	Post-embryonic plant morphogenesis
	T459_05146	4072.A0A2G3A767	GO Process	GO:0099402	Plant organ development
	T459_05146	4072.A0A2G3A767	GO Process	GO:1905392	Plant organ morphogenesis
	T459_05146	4072.A0A2G3A767	GO Component	GO:0005622	Intracellular anatomical structure
	T459_05146	4072.A0A2G3A767	GO Component	GO:0005737	Cytoplasm
	T459_05146	4072.A0A2G3A767	GO Component	GO:0005856	Cytoskeleton
	T459_05146	4072.A0A2G3A767	GO Component	GO:0005874	Microtubule
	T459_05146	4072.A0A2G3A767	GO Component	GO:0005881	Cytoplasmic microtubule
	T459_05146	4072.A0A2G3A767	GO Component	GO:0005886	Plasma membrane
	T459_05146	4072.A0A2G3A767	GO Component	GO:0005911	Cell-cell junction
	T459_05146	4072.A0A2G3A767	GO Component	GO:0005938	Cell cortex
	T459_05146	4072.A0A2G3A767	GO Component	GO:0009506	Plasmodesma
	T459_05146	4072.A0A2G3A767	GO Component	GO:0009524	Phragmoplast
	T459_05146	4072.A0A2G3A767	GO Component	GO:0009574	Preprophase band
	T459_05146	4072.A0A2G3A767	GO Component	GO:0015630	Microtubule cytoskeleton
	T459_05146	4072.A0A2G3A767	GO Component	GO:0016020	Membrane
	T459_05146	4072.A0A2G3A767	GO Component	GO:0030054	Cell junction
	T459_05146	4072.A0A2G3A767	GO Component	GO:0030863	Cortical cytoskeleton
	T459_05146	4072.A0A2G3A767	GO Component	GO:0030981	Cortical microtubule cytoskeleton
	T459_05146	4072.A0A2G3A767	GO Component	GO:0043226	Organelle
	T459_05146	4072.A0A2G3A767	GO Component	GO:0043228	Non-membrane-bounded organelle
	T459_05146	4072.A0A2G3A767	GO Component	GO:0043229	Intracellular organelle
	T459_05146	4072.A0A2G3A767	GO Component	GO:0043232	Intracellular non-membrane-bounded organelle
	T459_05146	4072.A0A2G3A767	GO Component	GO:0055028	Cortical microtubule
	T459_05146	4072.A0A2G3A767	GO Component	GO:0055044	Symplast
	T459_05146	4072.A0A2G3A767	GO Component	GO:0070161	Anchoring junction
	T459_05146	4072.A0A2G3A767	GO Component	GO:0071944	Cell periphery
	T459_05146	4072.A0A2G3A767	GO Component	GO:0099080	Supramolecular complex
	T459_05146	4072.A0A2G3A767	GO Component	GO:0099081	Supramolecular polymer
	T459_05146	4072.A0A2G3A767	GO Component	GO:0099512	Supramolecular fiber
	T459_05146	4072.A0A2G3A767	GO Component	GO:0099513	Polymeric cytoskeletal fiber
	T459_05146	4072.A0A2G3A767	GO Component	GO:0110165	Cellular anatomical entity
	T459_05146	4072.A0A2G3A767	STRING clusters	CL:42213	Mostly uncharacterized, incl. Response to L-glutamate, and Regulation of TOR signaling
	T459_05146	4072.A0A2G3A767	STRING clusters	CL:42215	Mostly uncharacterized, incl. Response to L-glutamate, and Regulation of TOR signaling
	T459_05146	4072.A0A2G3A767	STRING clusters	CL:42217	Mostly uncharacterized, incl. Regulation of TOR signaling, and Cell morphogenesis central region
	T459_05146	4072.A0A2G3A767	STRING clusters	CL:42218	Mixed, incl. Regulation of TOR signaling, and Cell morphogenesis central region
	T459_05146	4072.A0A2G3A767	STRING clusters	CL:42219	Mixed, incl. Cell morphogenesis central region, and Hobbit
	T459_05146	4072.A0A2G3A767	COMPARTMENTS	GOCC:0005622	Intracellular
	T459_05146	4072.A0A2G3A767	COMPARTMENTS	GOCC:0005737	Cytoplasm
	T459_05146	4072.A0A2G3A767	COMPARTMENTS	GOCC:0005856	Cytoskeleton
	T459_05146	4072.A0A2G3A767	COMPARTMENTS	GOCC:0005874	Microtubule
	T459_05146	4072.A0A2G3A767	COMPARTMENTS	GOCC:0005881	Cytoplasmic microtubule
	T459_05146	4072.A0A2G3A767	COMPARTMENTS	GOCC:0005938	Cell cortex
	T459_05146	4072.A0A2G3A767	COMPARTMENTS	GOCC:0009524	Phragmoplast
	T459_05146	4072.A0A2G3A767	COMPARTMENTS	GOCC:0009574	Preprophase band
	T459_05146	4072.A0A2G3A767	COMPARTMENTS	GOCC:0015630	Microtubule cytoskeleton
	T459_05146	4072.A0A2G3A767	COMPARTMENTS	GOCC:0020007	Apical complex
	T459_05146	4072.A0A2G3A767	COMPARTMENTS	GOCC:0020025	Subpellicular microtubule
	T459_05146	4072.A0A2G3A767	COMPARTMENTS	GOCC:0030054	Cell junction
	T459_05146	4072.A0A2G3A767	COMPARTMENTS	GOCC:0030863	Cortical cytoskeleton
	T459_05146	4072.A0A2G3A767	COMPARTMENTS	GOCC:0030981	Cortical microtubule cytoskeleton
	T459_05146	4072.A0A2G3A767	COMPARTMENTS	GOCC:0043226	Organelle
	T459_05146	4072.A0A2G3A767	COMPARTMENTS	GOCC:0043228	Non-membrane-bounded organelle
	T459_05146	4072.A0A2G3A767	COMPARTMENTS	GOCC:0043229	Intracellular organelle
	T459_05146	4072.A0A2G3A767	COMPARTMENTS	GOCC:0043232	Intracellular non-membrane-bounded organelle
	T459_05146	4072.A0A2G3A767	COMPARTMENTS	GOCC:0045177	Apical part of cell
	T459_05146	4072.A0A2G3A767	COMPARTMENTS	GOCC:0055028	Cortical microtubule
	T459_05146	4072.A0A2G3A767	COMPARTMENTS	GOCC:0070161	Anchoring junction
	T459_05146	4072.A0A2G3A767	COMPARTMENTS	GOCC:0071944	Cell periphery
	T459_05146	4072.A0A2G3A767	COMPARTMENTS	GOCC:0099080	Supramolecular complex
	T459_05146	4072.A0A2G3A767	COMPARTMENTS	GOCC:0099081	Supramolecular polymer
	T459_05146	4072.A0A2G3A767	COMPARTMENTS	GOCC:0099512	Supramolecular fiber
	T459_05146	4072.A0A2G3A767	COMPARTMENTS	GOCC:0099513	Polymeric cytoskeletal fiber
	T459_05146	4072.A0A2G3A767	COMPARTMENTS	GOCC:0110165	Cellular anatomical entity
	T459_05146	4072.A0A2G3A767	InterPro	IPR001611	Leucine-rich repeat
	T459_05146	4072.A0A2G3A767	InterPro	IPR032675	Leucine-rich repeat domain superfamily
	T459_06059	4072.A0A1U8FNB7	GO Process	GO:0006139	Nucleobase-containing compound metabolic process
	T459_06059	4072.A0A1U8FNB7	GO Process	GO:0006351	Transcription, DNA-templated
	T459_06059	4072.A0A1U8FNB7	GO Process	GO:0006353	DNA-templated transcription, termination
	T459_06059	4072.A0A1U8FNB7	GO Process	GO:0006366	Transcription by RNA polymerase II
	T459_06059	4072.A0A1U8FNB7	GO Process	GO:0006369	Termination of RNA polymerase II transcription
	T459_06059	4072.A0A1U8FNB7	GO Process	GO:0006725	Cellular aromatic compound metabolic process
	T459_06059	4072.A0A1U8FNB7	GO Process	GO:0006807	Nitrogen compound metabolic process
	T459_06059	4072.A0A1U8FNB7	GO Process	GO:0008152	Metabolic process
	T459_06059	4072.A0A1U8FNB7	GO Process	GO:0009058	Biosynthetic process
	T459_06059	4072.A0A1U8FNB7	GO Process	GO:0009059	Macromolecule biosynthetic process
	T459_06059	4072.A0A1U8FNB7	GO Process	GO:0009987	Cellular process
	T459_06059	4072.A0A1U8FNB7	GO Process	GO:0010467	Gene expression
	T459_06059	4072.A0A1U8FNB7	GO Process	GO:0016070	RNA metabolic process
	T459_06059	4072.A0A1U8FNB7	GO Process	GO:0018130	Heterocycle biosynthetic process
	T459_06059	4072.A0A1U8FNB7	GO Process	GO:0019438	Aromatic compound biosynthetic process
	T459_06059	4072.A0A1U8FNB7	GO Process	GO:0032774	RNA biosynthetic process
	T459_06059	4072.A0A1U8FNB7	GO Process	GO:0034641	Cellular nitrogen compound metabolic process
	T459_06059	4072.A0A1U8FNB7	GO Process	GO:0034654	Nucleobase-containing compound biosynthetic process
	T459_06059	4072.A0A1U8FNB7	GO Process	GO:0043170	Macromolecule metabolic process
	T459_06059	4072.A0A1U8FNB7	GO Process	GO:0044237	Cellular metabolic process
	T459_06059	4072.A0A1U8FNB7	GO Process	GO:0044238	Primary metabolic process
	T459_06059	4072.A0A1U8FNB7	GO Process	GO:0044249	Cellular biosynthetic process
	T459_06059	4072.A0A1U8FNB7	GO Process	GO:0044271	Cellular nitrogen compound biosynthetic process
	T459_06059	4072.A0A1U8FNB7	GO Process	GO:0046483	Heterocycle metabolic process
	T459_06059	4072.A0A1U8FNB7	GO Process	GO:0071704	Organic substance metabolic process
	T459_06059	4072.A0A1U8FNB7	GO Process	GO:0090304	Nucleic acid metabolic process
	T459_06059	4072.A0A1U8FNB7	GO Process	GO:0097659	Nucleic acid-templated transcription
	T459_06059	4072.A0A1U8FNB7	GO Process	GO:1901360	Organic cyclic compound metabolic process
	T459_06059	4072.A0A1U8FNB7	GO Process	GO:1901362	Organic cyclic compound biosynthetic process
	T459_06059	4072.A0A1U8FNB7	GO Process	GO:1901576	Organic substance biosynthetic process
	T459_06059	4072.A0A1U8FNB7	GO Function	GO:0003676	Nucleic acid binding
	T459_06059	4072.A0A1U8FNB7	GO Function	GO:0003723	RNA binding
	T459_06059	4072.A0A1U8FNB7	GO Function	GO:0003824	Catalytic activity
	T459_06059	4072.A0A1U8FNB7	GO Function	GO:0004386	Helicase activity
	T459_06059	4072.A0A1U8FNB7	GO Function	GO:0005488	Binding
	T459_06059	4072.A0A1U8FNB7	GO Function	GO:0016787	Hydrolase activity
	T459_06059	4072.A0A1U8FNB7	GO Function	GO:0097159	Organic cyclic compound binding
	T459_06059	4072.A0A1U8FNB7	GO Function	GO:0140640	Catalytic activity, acting on a nucleic acid
	T459_06059	4072.A0A1U8FNB7	GO Function	GO:0140657	ATP-dependent activity
	T459_06059	4072.A0A1U8FNB7	GO Function	GO:1901363	Heterocyclic compound binding
	T459_06059	4072.A0A1U8FNB7	GO Component	GO:0005622	Intracellular anatomical structure
	T459_06059	4072.A0A1U8FNB7	GO Component	GO:0005634	Nucleus
	T459_06059	4072.A0A1U8FNB7	GO Component	GO:0031974	Membrane-enclosed lumen
	T459_06059	4072.A0A1U8FNB7	GO Component	GO:0031981	Nuclear lumen
	T459_06059	4072.A0A1U8FNB7	GO Component	GO:0043226	Organelle
	T459_06059	4072.A0A1U8FNB7	GO Component	GO:0043227	Membrane-bounded organelle
	T459_06059	4072.A0A1U8FNB7	GO Component	GO:0043229	Intracellular organelle
	T459_06059	4072.A0A1U8FNB7	GO Component	GO:0043231	Intracellular membrane-bounded organelle
	T459_06059	4072.A0A1U8FNB7	GO Component	GO:0043233	Organelle lumen
	T459_06059	4072.A0A1U8FNB7	GO Component	GO:0070013	Intracellular organelle lumen
	T459_06059	4072.A0A1U8FNB7	GO Component	GO:0110165	Cellular anatomical entity
	T459_06059	4072.A0A1U8FNB7	STRING clusters	CL:56416	Mixed, incl. DNA2/NAM7 helicase-like, C-terminal, and 5-3 DNA helicase activity
	T459_06059	4072.A0A1U8FNB7	STRING clusters	CL:56417	DNA2/NAM7 helicase-like, C-terminal, and 5-3 DNA helicase activity
	T459_06059	4072.A0A1U8FNB7	STRING clusters	CL:56445	VDE lipocalin domain, and 5-3 DNA helicase activity
	T459_06059	4072.A0A1U8FNB7	COMPARTMENTS	GOCC:0005622	Intracellular
	T459_06059	4072.A0A1U8FNB7	COMPARTMENTS	GOCC:0005634	Nucleus
	T459_06059	4072.A0A1U8FNB7	COMPARTMENTS	GOCC:0043226	Organelle
	T459_06059	4072.A0A1U8FNB7	COMPARTMENTS	GOCC:0043227	Membrane-bounded organelle
	T459_06059	4072.A0A1U8FNB7	COMPARTMENTS	GOCC:0043229	Intracellular organelle
	T459_06059	4072.A0A1U8FNB7	COMPARTMENTS	GOCC:0043231	Intracellular membrane-bounded organelle
	T459_06059	4072.A0A1U8FNB7	COMPARTMENTS	GOCC:0110165	Cellular anatomical entity
	T459_06059	4072.A0A1U8FNB7	Pfam	PF13086	AAA domain
	T459_06059	4072.A0A1U8FNB7	Pfam	PF13087	AAA domain
	T459_06059	4072.A0A1U8FNB7	InterPro	IPR027417	P-loop containing nucleoside triphosphate hydrolase
	T459_06059	4072.A0A1U8FNB7	InterPro	IPR041677	DNA2/NAM7 helicase, helicase domain
	T459_06059	4072.A0A1U8FNB7	InterPro	IPR041679	DNA2/NAM7 helicase-like, C-terminal
	T459_06059	4072.A0A1U8FNB7	InterPro	IPR045055	DNA2/NAM7-like helicase
	T459_06059	4072.A0A1U8FNB7	InterPro	IPR045529	Domain of unknown function DUF6469
	T459_06059	4072.A0A1U8FNB7	InterPro	IPR047187	Upf1-like, C-terminal helicase domain
	T459_06183	4072.A0A1U8FMB2	GO Process	GO:0006066	Alcohol metabolic process
	T459_06183	4072.A0A1U8FMB2	GO Process	GO:0006082	Organic acid metabolic process
	T459_06183	4072.A0A1U8FMB2	GO Process	GO:0006091	Generation of precursor metabolites and energy
	T459_06183	4072.A0A1U8FMB2	GO Process	GO:0006099	Tricarboxylic acid cycle
	T459_06183	4072.A0A1U8FMB2	GO Process	GO:0006102	Isocitrate metabolic process
	T459_06183	4072.A0A1U8FMB2	GO Process	GO:0008152	Metabolic process
	T459_06183	4072.A0A1U8FMB2	GO Process	GO:0009060	Aerobic respiration
	T459_06183	4072.A0A1U8FMB2	GO Process	GO:0009987	Cellular process
	T459_06183	4072.A0A1U8FMB2	GO Process	GO:0015980	Energy derivation by oxidation of organic compounds
	T459_06183	4072.A0A1U8FMB2	GO Process	GO:0019752	Carboxylic acid metabolic process
	T459_06183	4072.A0A1U8FMB2	GO Process	GO:0043436	Oxoacid metabolic process
	T459_06183	4072.A0A1U8FMB2	GO Process	GO:0044237	Cellular metabolic process
	T459_06183	4072.A0A1U8FMB2	GO Process	GO:0044238	Primary metabolic process
	T459_06183	4072.A0A1U8FMB2	GO Process	GO:0044281	Small molecule metabolic process
	T459_06183	4072.A0A1U8FMB2	GO Process	GO:0045333	Cellular respiration
	T459_06183	4072.A0A1U8FMB2	GO Process	GO:0071704	Organic substance metabolic process
	T459_06183	4072.A0A1U8FMB2	GO Process	GO:0072350	Tricarboxylic acid metabolic process
	T459_06183	4072.A0A1U8FMB2	GO Process	GO:1901615	Organic hydroxy compound metabolic process
	T459_06183	4072.A0A1U8FMB2	GO Process	GO:1902652	Secondary alcohol metabolic process
	T459_06183	4072.A0A1U8FMB2	GO Function	GO:0003824	Catalytic activity
	T459_06183	4072.A0A1U8FMB2	GO Function	GO:0004448	Isocitrate dehydrogenase [NAD(P)+] activity
	T459_06183	4072.A0A1U8FMB2	GO Function	GO:0004449	Isocitrate dehydrogenase (NAD+) activity
	T459_06183	4072.A0A1U8FMB2	GO Function	GO:0005488	Binding
	T459_06183	4072.A0A1U8FMB2	GO Function	GO:0016491	Oxidoreductase activity
	T459_06183	4072.A0A1U8FMB2	GO Function	GO:0016614	Oxidoreductase activity, acting on CH-OH group of donors
	T459_06183	4072.A0A1U8FMB2	GO Function	GO:0016616	Oxidoreductase activity, acting on the CH-OH group of donors, NAD or NADP as acceptor
	T459_06183	4072.A0A1U8FMB2	GO Function	GO:0043167	Ion binding
	T459_06183	4072.A0A1U8FMB2	GO Function	GO:0043169	Cation binding
	T459_06183	4072.A0A1U8FMB2	GO Function	GO:0046872	Metal ion binding
	T459_06183	4072.A0A1U8FMB2	GO Component	GO:0005622	Intracellular anatomical structure
	T459_06183	4072.A0A1U8FMB2	GO Component	GO:0005737	Cytoplasm
	T459_06183	4072.A0A1U8FMB2	GO Component	GO:0005739	Mitochondrion
	T459_06183	4072.A0A1U8FMB2	GO Component	GO:0043226	Organelle
	T459_06183	4072.A0A1U8FMB2	GO Component	GO:0043227	Membrane-bounded organelle
	T459_06183	4072.A0A1U8FMB2	GO Component	GO:0043229	Intracellular organelle
	T459_06183	4072.A0A1U8FMB2	GO Component	GO:0043231	Intracellular membrane-bounded organelle
	T459_06183	4072.A0A1U8FMB2	GO Component	GO:0110165	Cellular anatomical entity
	T459_06183	4072.A0A1U8FMB2	STRING clusters	CL:14971	Pyruvate metabolism and Citric Acid (TCA) cycle, and Tricarboxylic acid cycle
	T459_06183	4072.A0A1U8FMB2	STRING clusters	CL:14972	Tricarboxylic acid cycle, and ATP citrate synthase activity
	T459_06183	4072.A0A1U8FMB2	STRING clusters	CL:14973	Tricarboxylic acid cycle, and ATP citrate synthase activity
	T459_06183	4072.A0A1U8FMB2	STRING clusters	CL:15063	Mixed, incl. Isocitrate/isopropylmalate dehydrogenase, and Omega-amidase activity
	T459_06183	4072.A0A1U8FMB2	STRING clusters	CL:15065	Isocitrate/isopropylmalate dehydrogenase, and Aconitase family, 4Fe-4S cluster binding site
	T459_06183	4072.A0A1U8FMB2	KEGG	cann00020	Citrate cycle (TCA cycle)
	T459_06183	4072.A0A1U8FMB2	KEGG	cann01100	Metabolic pathways
	T459_06183	4072.A0A1U8FMB2	KEGG	cann01110	Biosynthesis of secondary metabolites
	T459_06183	4072.A0A1U8FMB2	KEGG	cann01200	Carbon metabolism
	T459_06183	4072.A0A1U8FMB2	KEGG	cann01210	2-Oxocarboxylic acid metabolism
	T459_06183	4072.A0A1U8FMB2	KEGG	cann01230	Biosynthesis of amino acids
	T459_06183	4072.A0A1U8FMB2	Reactome	MAP-1428517	The citric acid (TCA) cycle and respiratory electron transport
	T459_06183	4072.A0A1U8FMB2	Reactome	MAP-1430728	Metabolism
	T459_06183	4072.A0A1U8FMB2	Reactome	MAP-71403	Citric acid cycle (TCA cycle)
	T459_06183	4072.A0A1U8FMB2	Reactome	MAP-71406	Pyruvate metabolism and Citric Acid (TCA) cycle
	T459_06183	4072.A0A1U8FMB2	COMPARTMENTS	GOCC:0005622	Intracellular
	T459_06183	4072.A0A1U8FMB2	COMPARTMENTS	GOCC:0005737	Cytoplasm
	T459_06183	4072.A0A1U8FMB2	COMPARTMENTS	GOCC:0005739	Mitochondrion
	T459_06183	4072.A0A1U8FMB2	COMPARTMENTS	GOCC:0043226	Organelle
	T459_06183	4072.A0A1U8FMB2	COMPARTMENTS	GOCC:0043227	Membrane-bounded organelle
	T459_06183	4072.A0A1U8FMB2	COMPARTMENTS	GOCC:0043229	Intracellular organelle
	T459_06183	4072.A0A1U8FMB2	COMPARTMENTS	GOCC:0043231	Intracellular membrane-bounded organelle
	T459_06183	4072.A0A1U8FMB2	COMPARTMENTS	GOCC:0110165	Cellular anatomical entity
	T459_06183	4072.A0A1U8FMB2	InterPro	IPR004434	Isocitrate dehydrogenase NAD-dependent
	T459_06183	4072.A0A1U8FMB2	InterPro	IPR024084	Isopropylmalate dehydrogenase-like domain
	T459_06183	4072.A0A1U8FMB2	SMART	SM01329	Isocitrate/isopropylmalate dehydrogenase
	T459_06610	4072.A0A1U8FQE7	STRING clusters	CL:44169	Mixed, incl. YhbY-like superfamily, and Protein unc-13 homologue
	T459_06610	4072.A0A1U8FQE7	STRING clusters	CL:44170	Mixed, incl. Protein unc-13 homologue, and Regulation of epidermal cell division
	T459_07028	4072.A0A1U8FQ53	STRING clusters	CL:31660	Mixed, incl. NB-ARC domain, and A Receptor for Ubiquitination Targets
	T459_07028	4072.A0A1U8FQ53	STRING clusters	CL:31664	Mixed, incl. NB-ARC domain, and A Receptor for Ubiquitination Targets
	T459_07028	4072.A0A1U8FQ53	STRING clusters	CL:31665	Mixed, incl. NB-ARC domain, and Zinc finger C2H2 superfamily
	T459_07028	4072.A0A1U8FQ53	STRING clusters	CL:31666	Mixed, incl. NB-ARC domain, and Plant calmodulin-binding domain
	T459_07028	4072.A0A1U8FQ53	STRING clusters	CL:31667	Mixed, incl. NB-ARC domain, and Plant calmodulin-binding domain
	T459_07028	4072.A0A1U8FQ53	STRING clusters	CL:31668	Mixed, incl. Plant calmodulin-binding domain, and NB-ARC domain
	T459_07028	4072.A0A1U8FQ53	STRING clusters	CL:31670	Mostly uncharacterized, incl. Plant calmodulin-binding domain, and Protein WVD2-like 7
	T459_07028	4072.A0A1U8FQ53	STRING clusters	CL:31753	Mostly uncharacterized, incl. Protein enhanced disease resistance 4-like, and Myosin-binding protein
	T459_07028	4072.A0A1U8FQ53	STRING clusters	CL:31754	Mostly uncharacterized, incl. Myosin-binding protein, and Plant calmodulin-binding domain
	T459_07028	4072.A0A1U8FQ53	STRING clusters	CL:31755	Mostly uncharacterized, incl. Plant calmodulin-binding domain, and Protein N-terminus binding
	T459_07028	4072.A0A1U8FQ53	STRING clusters	CL:31758	Mixed, incl. Protein of unknown function DUF863, plant, and Myosin-binding protein
	T459_07028	4072.A0A1U8FQ53	Pfam	PF05904	Plant protein of unknown function (DUF863)
	T459_07028	4072.A0A1U8FQ53	InterPro	IPR008581	Protein of unknown function DUF863, plant
	T459_07059	4072.A0A2G3ACH2	GO Process	GO:0008152	Metabolic process
	T459_07059	4072.A0A2G3ACH2	GO Process	GO:0009987	Cellular process
	T459_07059	4072.A0A2G3ACH2	GO Process	GO:0044237	Cellular metabolic process
	T459_07059	4072.A0A2G3ACH2	GO Process	GO:0044238	Primary metabolic process
	T459_07059	4072.A0A2G3ACH2	GO Process	GO:0071704	Organic substance metabolic process
	T459_07059	4072.A0A2G3ACH2	GO Function	GO:0005488	Binding
	T459_07059	4072.A0A2G3ACH2	GO Component	GO:0005622	Intracellular anatomical structure
	T459_07059	4072.A0A2G3ACH2	GO Component	GO:0005737	Cytoplasm
	T459_07059	4072.A0A2G3ACH2	GO Component	GO:0043226	Organelle
	T459_07059	4072.A0A2G3ACH2	GO Component	GO:0043227	Membrane-bounded organelle
	T459_07059	4072.A0A2G3ACH2	GO Component	GO:0043229	Intracellular organelle
	T459_07059	4072.A0A2G3ACH2	GO Component	GO:0043231	Intracellular membrane-bounded organelle
	T459_07059	4072.A0A2G3ACH2	GO Component	GO:0110165	Cellular anatomical entity
	T459_07059	4072.A0A2G3ACH2	STRING clusters	CL:59444	Protein THYLAKOID ASSEMBLY 8-like, and PPR repeat family
	T459_07059	4072.A0A2G3ACH2	COMPARTMENTS	GOCC:0005622	Intracellular
	T459_07059	4072.A0A2G3ACH2	COMPARTMENTS	GOCC:0043226	Organelle
	T459_07059	4072.A0A2G3ACH2	COMPARTMENTS	GOCC:0043229	Intracellular organelle
	T459_07059	4072.A0A2G3ACH2	COMPARTMENTS	GOCC:0110165	Cellular anatomical entity
	T459_07059	4072.A0A2G3ACH2	Pfam	PF01535	PPR repeat
	T459_07059	4072.A0A2G3ACH2	Pfam	PF13041	PPR repeat family
	T459_07059	4072.A0A2G3ACH2	Pfam	PF13812	Pentatricopeptide repeat domain
	T459_07059	4072.A0A2G3ACH2	InterPro	IPR002885	Pentatricopeptide repeat
	T459_07059	4072.A0A2G3ACH2	InterPro	IPR011990	Tetratricopeptide-like helical domain superfamily
	T459_07059	4072.A0A2G3ACH2	InterPro	IPR046848	E motif
	T459_07059	4072.A0A2G3ACH2	InterPro	IPR046960	Pentatricopeptide repeat-containing protein At4g14850-like, plant
	T459_07645	4072.A0A2G2ZU88	GO Process	GO:0008152	Metabolic process
	T459_07645	4072.A0A2G2ZU88	GO Process	GO:0032259	Methylation
	T459_07645	4072.A0A2G2ZU88	GO Function	GO:0003824	Catalytic activity
	T459_07645	4072.A0A2G2ZU88	GO Function	GO:0008168	Methyltransferase activity
	T459_07645	4072.A0A2G2ZU88	GO Function	GO:0016740	Transferase activity
	T459_07645	4072.A0A2G2ZU88	GO Function	GO:0016741	Transferase activity, transferring one-carbon groups
	T459_07645	4072.A0A2G2ZU88	GO Component	GO:0005622	Intracellular anatomical structure
	T459_07645	4072.A0A2G2ZU88	GO Component	GO:0005737	Cytoplasm
	T459_07645	4072.A0A2G2ZU88	GO Component	GO:0005829	Cytosol
	T459_07645	4072.A0A2G2ZU88	GO Component	GO:0009507	Chloroplast
	T459_07645	4072.A0A2G2ZU88	GO Component	GO:0009536	Plastid
	T459_07645	4072.A0A2G2ZU88	GO Component	GO:0043226	Organelle
	T459_07645	4072.A0A2G2ZU88	GO Component	GO:0043227	Membrane-bounded organelle
	T459_07645	4072.A0A2G2ZU88	GO Component	GO:0043229	Intracellular organelle
	T459_07645	4072.A0A2G2ZU88	GO Component	GO:0043231	Intracellular membrane-bounded organelle
	T459_07645	4072.A0A2G2ZU88	GO Component	GO:0110165	Cellular anatomical entity
	T459_07645	4072.A0A2G2ZU88	STRING clusters	CL:57139	Mixed, incl. Lipase (class 3), and Arsenite methyltransferase-like
	T459_07645	4072.A0A2G2ZU88	STRING clusters	CL:57305	Mixed, incl. Arsenite methyltransferase-like, and DVL
	T459_07645	4072.A0A2G2ZU88	Reactome	MAP-1430728	Metabolism
	T459_07645	4072.A0A2G2ZU88	Reactome	MAP-211859	Biological oxidations
	T459_07645	4072.A0A2G2ZU88	Reactome	MAP-211897	Cytochrome P450 - arranged by substrate type
	T459_07645	4072.A0A2G2ZU88	Reactome	MAP-211945	Phase I - Functionalization of compounds
	T459_07645	4072.A0A2G2ZU88	COMPARTMENTS	GOCC:0005622	Intracellular
	T459_07645	4072.A0A2G2ZU88	COMPARTMENTS	GOCC:0005737	Cytoplasm
	T459_07645	4072.A0A2G2ZU88	COMPARTMENTS	GOCC:0016020	Membrane
	T459_07645	4072.A0A2G2ZU88	COMPARTMENTS	GOCC:0031090	Organelle membrane
	T459_07645	4072.A0A2G2ZU88	COMPARTMENTS	GOCC:0043226	Organelle
	T459_07645	4072.A0A2G2ZU88	COMPARTMENTS	GOCC:0043227	Membrane-bounded organelle
	T459_07645	4072.A0A2G2ZU88	COMPARTMENTS	GOCC:0043229	Intracellular organelle
	T459_07645	4072.A0A2G2ZU88	COMPARTMENTS	GOCC:0043231	Intracellular membrane-bounded organelle
	T459_07645	4072.A0A2G2ZU88	COMPARTMENTS	GOCC:0110165	Cellular anatomical entity
	T459_07645	4072.A0A2G2ZU88	Pfam	PF01494	FAD binding domain
	T459_07645	4072.A0A2G2ZU88	Pfam	PF13489	Methyltransferase domain
	T459_07645	4072.A0A2G2ZU88	InterPro	IPR002937	Amine oxidase
	T459_07645	4072.A0A2G2ZU88	InterPro	IPR026669	Arsenite methyltransferase-like
	T459_07645	4072.A0A2G2ZU88	InterPro	IPR029063	S-adenosyl-L-methionine-dependent methyltransferase superfamily
	T459_07645	4072.A0A2G2ZU88	InterPro	IPR036188	FAD/NAD(P)-binding domain superfamily
	T459_08211	4072.A0A2G2ZVW0	GO Process	GO:0000724	Double-strand break repair via homologous recombination
	T459_08211	4072.A0A2G2ZVW0	GO Process	GO:0000725	Recombinational repair
	T459_08211	4072.A0A2G2ZVW0	GO Process	GO:0006139	Nucleobase-containing compound metabolic process
	T459_08211	4072.A0A2G2ZVW0	GO Process	GO:0006259	DNA metabolic process
	T459_08211	4072.A0A2G2ZVW0	GO Process	GO:0006281	DNA repair
	T459_08211	4072.A0A2G2ZVW0	GO Process	GO:0006302	Double-strand break repair
	T459_08211	4072.A0A2G2ZVW0	GO Process	GO:0006310	DNA recombination
	T459_08211	4072.A0A2G2ZVW0	GO Process	GO:0006325	Chromatin organization
	T459_08211	4072.A0A2G2ZVW0	GO Process	GO:0006334	Nucleosome assembly
	T459_08211	4072.A0A2G2ZVW0	GO Process	GO:0006338	Chromatin remodeling
	T459_08211	4072.A0A2G2ZVW0	GO Process	GO:0006725	Cellular aromatic compound metabolic process
	T459_08211	4072.A0A2G2ZVW0	GO Process	GO:0006807	Nitrogen compound metabolic process
	T459_08211	4072.A0A2G2ZVW0	GO Process	GO:0006950	Response to stress
	T459_08211	4072.A0A2G2ZVW0	GO Process	GO:0006974	Cellular response to DNA damage stimulus
	T459_08211	4072.A0A2G2ZVW0	GO Process	GO:0006996	Organelle organization
	T459_08211	4072.A0A2G2ZVW0	GO Process	GO:0008152	Metabolic process
	T459_08211	4072.A0A2G2ZVW0	GO Process	GO:0009987	Cellular process
	T459_08211	4072.A0A2G2ZVW0	GO Process	GO:0016043	Cellular component organization
	T459_08211	4072.A0A2G2ZVW0	GO Process	GO:0022607	Cellular component assembly
	T459_08211	4072.A0A2G2ZVW0	GO Process	GO:0031497	Chromatin assembly
	T459_08211	4072.A0A2G2ZVW0	GO Process	GO:0033554	Cellular response to stress
	T459_08211	4072.A0A2G2ZVW0	GO Process	GO:0034641	Cellular nitrogen compound metabolic process
	T459_08211	4072.A0A2G2ZVW0	GO Process	GO:0034728	Nucleosome organization
	T459_08211	4072.A0A2G2ZVW0	GO Process	GO:0043170	Macromolecule metabolic process
	T459_08211	4072.A0A2G2ZVW0	GO Process	GO:0043933	Protein-containing complex organization
	T459_08211	4072.A0A2G2ZVW0	GO Process	GO:0044085	Cellular component biogenesis
	T459_08211	4072.A0A2G2ZVW0	GO Process	GO:0044237	Cellular metabolic process
	T459_08211	4072.A0A2G2ZVW0	GO Process	GO:0044238	Primary metabolic process
	T459_08211	4072.A0A2G2ZVW0	GO Process	GO:0044260	Cellular macromolecule metabolic process
	T459_08211	4072.A0A2G2ZVW0	GO Process	GO:0046483	Heterocycle metabolic process
	T459_08211	4072.A0A2G2ZVW0	GO Process	GO:0050896	Response to stimulus
	T459_08211	4072.A0A2G2ZVW0	GO Process	GO:0051276	Chromosome organization
	T459_08211	4072.A0A2G2ZVW0	GO Process	GO:0051716	Cellular response to stimulus
	T459_08211	4072.A0A2G2ZVW0	GO Process	GO:0065003	Protein-containing complex assembly
	T459_08211	4072.A0A2G2ZVW0	GO Process	GO:0065004	protein-DNA complex assembly
	T459_08211	4072.A0A2G2ZVW0	GO Process	GO:0071704	Organic substance metabolic process
	T459_08211	4072.A0A2G2ZVW0	GO Process	GO:0071824	protein-DNA complex subunit organization
	T459_08211	4072.A0A2G2ZVW0	GO Process	GO:0071840	Cellular component organization or biogenesis
	T459_08211	4072.A0A2G2ZVW0	GO Process	GO:0090304	Nucleic acid metabolic process
	T459_08211	4072.A0A2G2ZVW0	GO Process	GO:1901360	Organic cyclic compound metabolic process
	T459_08211	4072.A0A2G2ZVW0	GO Function	GO:0003682	Chromatin binding
	T459_08211	4072.A0A2G2ZVW0	GO Function	GO:0005488	Binding
	T459_08211	4072.A0A2G2ZVW0	GO Function	GO:0005515	Protein binding
	T459_08211	4072.A0A2G2ZVW0	GO Function	GO:0042393	Histone binding
	T459_08211	4072.A0A2G2ZVW0	GO Component	GO:0000785	Chromatin
	T459_08211	4072.A0A2G2ZVW0	GO Component	GO:0005622	Intracellular anatomical structure
	T459_08211	4072.A0A2G2ZVW0	GO Component	GO:0005634	Nucleus
	T459_08211	4072.A0A2G2ZVW0	GO Component	GO:0005694	Chromosome
	T459_08211	4072.A0A2G2ZVW0	GO Component	GO:0005737	Cytoplasm
	T459_08211	4072.A0A2G2ZVW0	GO Component	GO:0043226	Organelle
	T459_08211	4072.A0A2G2ZVW0	GO Component	GO:0043227	Membrane-bounded organelle
	T459_08211	4072.A0A2G2ZVW0	GO Component	GO:0043228	Non-membrane-bounded organelle
	T459_08211	4072.A0A2G2ZVW0	GO Component	GO:0043229	Intracellular organelle
	T459_08211	4072.A0A2G2ZVW0	GO Component	GO:0043231	Intracellular membrane-bounded organelle
	T459_08211	4072.A0A2G2ZVW0	GO Component	GO:0043232	Intracellular non-membrane-bounded organelle
	T459_08211	4072.A0A2G2ZVW0	GO Component	GO:0110165	Cellular anatomical entity
	T459_08211	4072.A0A2G2ZVW0	STRING clusters	CL:11332	Structural constituent of chromatin, and Histone-lysine N-methyltransferase activity
	T459_08211	4072.A0A2G2ZVW0	STRING clusters	CL:11333	Structural constituent of chromatin, and PKMTs methylate histone lysines
	T459_08211	4072.A0A2G2ZVW0	STRING clusters	CL:11334	Structural constituent of chromatin, and PKMTs methylate histone lysines
	T459_08211	4072.A0A2G2ZVW0	STRING clusters	CL:11337	Structural constituent of chromatin, and PKMTs methylate histone lysines
	T459_08211	4072.A0A2G2ZVW0	STRING clusters	CL:11340	Structural constituent of chromatin, and PKMTs methylate histone lysines
	T459_08211	4072.A0A2G2ZVW0	COMPARTMENTS	GOCC:0005622	Intracellular
	T459_08211	4072.A0A2G2ZVW0	COMPARTMENTS	GOCC:0005634	Nucleus
	T459_08211	4072.A0A2G2ZVW0	COMPARTMENTS	GOCC:0005737	Cytoplasm
	T459_08211	4072.A0A2G2ZVW0	COMPARTMENTS	GOCC:0043226	Organelle
	T459_08211	4072.A0A2G2ZVW0	COMPARTMENTS	GOCC:0043227	Membrane-bounded organelle
	T459_08211	4072.A0A2G2ZVW0	COMPARTMENTS	GOCC:0043229	Intracellular organelle
	T459_08211	4072.A0A2G2ZVW0	COMPARTMENTS	GOCC:0043231	Intracellular membrane-bounded organelle
	T459_08211	4072.A0A2G2ZVW0	COMPARTMENTS	GOCC:0110165	Cellular anatomical entity
	T459_08211	4072.A0A2G2ZVW0	UniProt Keywords	KW-0175	Coiled coil
	T459_08211	4072.A0A2G2ZVW0	Pfam	PF00956	Nucleosome assembly protein (NAP)
	T459_08211	4072.A0A2G2ZVW0	InterPro	IPR002164	Nucleosome assembly protein (NAP)
	T459_08211	4072.A0A2G2ZVW0	InterPro	IPR037231	NAP-like superfamily
	T459_09878	4072.A0A2G3A0L1	GO Process	GO:0006082	Organic acid metabolic process
	T459_09878	4072.A0A2G3A0L1	GO Process	GO:0006520	Cellular amino acid metabolic process
	T459_09878	4072.A0A2G3A0L1	GO Process	GO:0006725	Cellular aromatic compound metabolic process
	T459_09878	4072.A0A2G3A0L1	GO Process	GO:0006807	Nitrogen compound metabolic process
	T459_09878	4072.A0A2G3A0L1	GO Process	GO:0008152	Metabolic process
	T459_09878	4072.A0A2G3A0L1	GO Process	GO:0009058	Biosynthetic process
	T459_09878	4072.A0A2G3A0L1	GO Process	GO:0009987	Cellular process
	T459_09878	4072.A0A2G3A0L1	GO Process	GO:0018958	Phenol-containing compound metabolic process
	T459_09878	4072.A0A2G3A0L1	GO Process	GO:0019438	Aromatic compound biosynthetic process
	T459_09878	4072.A0A2G3A0L1	GO Process	GO:0019752	Carboxylic acid metabolic process
	T459_09878	4072.A0A2G3A0L1	GO Process	GO:0043436	Oxoacid metabolic process
	T459_09878	4072.A0A2G3A0L1	GO Process	GO:0044237	Cellular metabolic process
	T459_09878	4072.A0A2G3A0L1	GO Process	GO:0044238	Primary metabolic process
	T459_09878	4072.A0A2G3A0L1	GO Process	GO:0044249	Cellular biosynthetic process
	T459_09878	4072.A0A2G3A0L1	GO Process	GO:0044281	Small molecule metabolic process
	T459_09878	4072.A0A2G3A0L1	GO Process	GO:0046189	Phenol-containing compound biosynthetic process
	T459_09878	4072.A0A2G3A0L1	GO Process	GO:0071704	Organic substance metabolic process
	T459_09878	4072.A0A2G3A0L1	GO Process	GO:1901160	Primary amino compound metabolic process
	T459_09878	4072.A0A2G3A0L1	GO Process	GO:1901162	Primary amino compound biosynthetic process
	T459_09878	4072.A0A2G3A0L1	GO Process	GO:1901360	Organic cyclic compound metabolic process
	T459_09878	4072.A0A2G3A0L1	GO Process	GO:1901362	Organic cyclic compound biosynthetic process
	T459_09878	4072.A0A2G3A0L1	GO Process	GO:1901564	Organonitrogen compound metabolic process
	T459_09878	4072.A0A2G3A0L1	GO Process	GO:1901566	Organonitrogen compound biosynthetic process
	T459_09878	4072.A0A2G3A0L1	GO Process	GO:1901576	Organic substance biosynthetic process
	T459_09878	4072.A0A2G3A0L1	GO Process	GO:1901615	Organic hydroxy compound metabolic process
	T459_09878	4072.A0A2G3A0L1	GO Process	GO:1901617	Organic hydroxy compound biosynthetic process
	T459_09878	4072.A0A2G3A0L1	GO Function	GO:0003824	Catalytic activity
	T459_09878	4072.A0A2G3A0L1	GO Function	GO:0005488	Binding
	T459_09878	4072.A0A2G3A0L1	GO Function	GO:0016829	Lyase activity
	T459_09878	4072.A0A2G3A0L1	GO Function	GO:0016830	Carbon-carbon lyase activity
	T459_09878	4072.A0A2G3A0L1	GO Function	GO:0016831	Carboxy-lyase activity
	T459_09878	4072.A0A2G3A0L1	GO Function	GO:0019842	Vitamin binding
	T459_09878	4072.A0A2G3A0L1	GO Function	GO:0030170	Pyridoxal phosphate binding
	T459_09878	4072.A0A2G3A0L1	GO Function	GO:0036094	Small molecule binding
	T459_09878	4072.A0A2G3A0L1	GO Function	GO:0043167	Ion binding
	T459_09878	4072.A0A2G3A0L1	GO Function	GO:0043168	Anion binding
	T459_09878	4072.A0A2G3A0L1	GO Function	GO:0070279	Vitamin B6 binding
	T459_09878	4072.A0A2G3A0L1	GO Function	GO:0097159	Organic cyclic compound binding
	T459_09878	4072.A0A2G3A0L1	GO Function	GO:1901363	Heterocyclic compound binding
	T459_09878	4072.A0A2G3A0L1	GO Component	GO:0005622	Intracellular anatomical structure
	T459_09878	4072.A0A2G3A0L1	GO Component	GO:0005737	Cytoplasm
	T459_09878	4072.A0A2G3A0L1	GO Component	GO:0110165	Cellular anatomical entity
	T459_09878	4072.A0A2G3A0L1	STRING clusters	CL:14378	Mixed, incl. Aromatic amino acid family biosynthetic process, and Branched-chain amino acid biosynthetic process
	T459_09878	4072.A0A2G3A0L1	STRING clusters	CL:14564	Phenylalanine metabolism, and Prephenate dehydrogenase
	T459_09878	4072.A0A2G3A0L1	STRING clusters	CL:14604	Pyridoxal-phosphate binding site, and Acetyltransferase NSI-like
	T459_09878	4072.A0A2G3A0L1	STRING clusters	CL:14606	Aromatic-L-amino-acid decarboxylase, and Phenylpropanoid metabolism
	T459_09878	4072.A0A2G3A0L1	KEGG	cann00360	Phenylalanine metabolism
	T459_09878	4072.A0A2G3A0L1	KEGG	cann01100	Metabolic pathways
	T459_09878	4072.A0A2G3A0L1	Reactome	MAP-1430728	Metabolism
	T459_09878	4072.A0A2G3A0L1	Reactome	MAP-71291	Metabolism of amino acids and derivatives
	T459_09878	4072.A0A2G3A0L1	COMPARTMENTS	GOCC:0005622	Intracellular
	T459_09878	4072.A0A2G3A0L1	COMPARTMENTS	GOCC:0005737	Cytoplasm
	T459_09878	4072.A0A2G3A0L1	COMPARTMENTS	GOCC:0110165	Cellular anatomical entity
	T459_09878	4072.A0A2G3A0L1	UniProt Keywords	KW-0456	Lyase
	T459_09878	4072.A0A2G3A0L1	UniProt Keywords	KW-0663	Pyridoxal phosphate
	T459_09878	4072.A0A2G3A0L1	Pfam	PF00282	Pyridoxal-dependent decarboxylase conserved domain
	T459_09878	4072.A0A2G3A0L1	InterPro	IPR002129	Pyridoxal phosphate-dependent decarboxylase
	T459_09878	4072.A0A2G3A0L1	InterPro	IPR010977	Aromatic-L-amino-acid decarboxylase
	T459_09878	4072.A0A2G3A0L1	InterPro	IPR015421	Pyridoxal phosphate-dependent transferase, major domain
	T459_09878	4072.A0A2G3A0L1	InterPro	IPR015422	Pyridoxal phosphate-dependent transferase, small domain
	T459_09878	4072.A0A2G3A0L1	InterPro	IPR015424	Pyridoxal phosphate-dependent transferase
	T459_09878	4072.A0A2G3A0L1	InterPro	IPR021115	Pyridoxal-phosphate binding site
	T459_10333	4072.A0A2G3A1W4	GO Process	GO:0006082	Organic acid metabolic process
	T459_10333	4072.A0A2G3A1W4	GO Process	GO:0006629	Lipid metabolic process
	T459_10333	4072.A0A2G3A1W4	GO Process	GO:0006631	Fatty acid metabolic process
	T459_10333	4072.A0A2G3A1W4	GO Process	GO:0008152	Metabolic process
	T459_10333	4072.A0A2G3A1W4	GO Process	GO:0009987	Cellular process
	T459_10333	4072.A0A2G3A1W4	GO Process	GO:0019752	Carboxylic acid metabolic process
	T459_10333	4072.A0A2G3A1W4	GO Process	GO:0032787	Monocarboxylic acid metabolic process
	T459_10333	4072.A0A2G3A1W4	GO Process	GO:0043436	Oxoacid metabolic process
	T459_10333	4072.A0A2G3A1W4	GO Process	GO:0044237	Cellular metabolic process
	T459_10333	4072.A0A2G3A1W4	GO Process	GO:0044238	Primary metabolic process
	T459_10333	4072.A0A2G3A1W4	GO Process	GO:0044255	Cellular lipid metabolic process
	T459_10333	4072.A0A2G3A1W4	GO Process	GO:0044281	Small molecule metabolic process
	T459_10333	4072.A0A2G3A1W4	GO Process	GO:0071704	Organic substance metabolic process
	T459_10333	4072.A0A2G3A1W4	GO Function	GO:0003824	Catalytic activity
	T459_10333	4072.A0A2G3A1W4	GO Function	GO:0016874	Ligase activity
	T459_10333	4072.A0A2G3A1W4	GO Component	GO:0005622	Intracellular anatomical structure
	T459_10333	4072.A0A2G3A1W4	GO Component	GO:0005737	Cytoplasm
	T459_10333	4072.A0A2G3A1W4	GO Component	GO:0005777	Peroxisome
	T459_10333	4072.A0A2G3A1W4	GO Component	GO:0042579	Microbody
	T459_10333	4072.A0A2G3A1W4	GO Component	GO:0043226	Organelle
	T459_10333	4072.A0A2G3A1W4	GO Component	GO:0043227	Membrane-bounded organelle
	T459_10333	4072.A0A2G3A1W4	GO Component	GO:0043229	Intracellular organelle
	T459_10333	4072.A0A2G3A1W4	GO Component	GO:0043231	Intracellular membrane-bounded organelle
	T459_10333	4072.A0A2G3A1W4	GO Component	GO:0110165	Cellular anatomical entity
	T459_10333	4072.A0A2G3A1W4	STRING clusters	CL:16060	Mixed, incl. Biotin transport and metabolism, and Fatty acid beta-oxidation
	T459_10333	4072.A0A2G3A1W4	STRING clusters	CL:16061	Mixed, incl. Fatty acid beta-oxidation, and AMP-binding enzyme
	T459_10333	4072.A0A2G3A1W4	STRING clusters	CL:16063	Mixed, incl. Fatty acid beta-oxidation, and AMP-binding enzyme
	T459_10333	4072.A0A2G3A1W4	STRING clusters	CL:16067	Mixed, incl. Fatty acid beta-oxidation, and AMP-binding enzyme
	T459_10333	4072.A0A2G3A1W4	STRING clusters	CL:16072	Mixed, incl. Fatty acid beta-oxidation, and AMP-binding enzyme
	T459_10333	4072.A0A2G3A1W4	STRING clusters	CL:16077	Mixed, incl. Fatty acid beta-oxidation, and AMP-binding enzyme
	T459_10333	4072.A0A2G3A1W4	STRING clusters	CL:16081	Mixed, incl. Fatty acid beta-oxidation, and Aldehyde dehydrogenase, N-terminal
	T459_10333	4072.A0A2G3A1W4	STRING clusters	CL:16084	Mixed, incl. Fatty acid beta-oxidation, and Aldehyde dehydrogenase, N-terminal
	T459_10333	4072.A0A2G3A1W4	STRING clusters	CL:16089	Mixed, incl. Fatty acid beta-oxidation, and Aldehyde dehydrogenase, N-terminal
	T459_10333	4072.A0A2G3A1W4	STRING clusters	CL:16247	Mixed, incl. Aldehyde dehydrogenase, N-terminal, and Catalase activity
	T459_10333	4072.A0A2G3A1W4	STRING clusters	CL:16249	Mixed, incl. Aldehyde dehydrogenase, N-terminal, and Catalase activity
	T459_10333	4072.A0A2G3A1W4	STRING clusters	CL:16250	Aldehyde dehydrogenase, N-terminal, and Low specificity L-threonine aldolase
	T459_10333	4072.A0A2G3A1W4	Reactome	MAP-1430728	Metabolism
	T459_10333	4072.A0A2G3A1W4	COMPARTMENTS	GOCC:0005622	Intracellular
	T459_10333	4072.A0A2G3A1W4	COMPARTMENTS	GOCC:0005737	Cytoplasm
	T459_10333	4072.A0A2G3A1W4	COMPARTMENTS	GOCC:0005777	Peroxisome
	T459_10333	4072.A0A2G3A1W4	COMPARTMENTS	GOCC:0042579	Microbody
	T459_10333	4072.A0A2G3A1W4	COMPARTMENTS	GOCC:0043226	Organelle
	T459_10333	4072.A0A2G3A1W4	COMPARTMENTS	GOCC:0043227	Membrane-bounded organelle
	T459_10333	4072.A0A2G3A1W4	COMPARTMENTS	GOCC:0043229	Intracellular organelle
	T459_10333	4072.A0A2G3A1W4	COMPARTMENTS	GOCC:0043231	Intracellular membrane-bounded organelle
	T459_10333	4072.A0A2G3A1W4	COMPARTMENTS	GOCC:0110165	Cellular anatomical entity
	T459_10333	4072.A0A2G3A1W4	UniProt Keywords	KW-0472	Membrane
	T459_10333	4072.A0A2G3A1W4	UniProt Keywords	KW-0812	Transmembrane
	T459_10333	4072.A0A2G3A1W4	UniProt Keywords	KW-1133	Transmembrane helix
	T459_10333	4072.A0A2G3A1W4	Pfam	PF00501	AMP-binding enzyme
	T459_10333	4072.A0A2G3A1W4	InterPro	IPR000873	AMP-dependent synthetase/ligase domain
	T459_10333	4072.A0A2G3A1W4	InterPro	IPR020845	AMP-binding, conserved site
	T459_10333	4072.A0A2G3A1W4	InterPro	IPR042099	ANL, N-terminal domain
	T459_10333	4072.A0A2G3A1W4	InterPro	IPR045851	AMP-binding enzyme, C-terminal domain superfamily
	T459_10346	4072.A0A1U8EDB4	GO Process	GO:0006508	Proteolysis
	T459_10346	4072.A0A1U8EDB4	GO Process	GO:0006807	Nitrogen compound metabolic process
	T459_10346	4072.A0A1U8EDB4	GO Process	GO:0008152	Metabolic process
	T459_10346	4072.A0A1U8EDB4	GO Process	GO:0010467	Gene expression
	T459_10346	4072.A0A1U8EDB4	GO Process	GO:0016485	Protein processing
	T459_10346	4072.A0A1U8EDB4	GO Process	GO:0016540	Protein autoprocessing
	T459_10346	4072.A0A1U8EDB4	GO Process	GO:0019538	Protein metabolic process
	T459_10346	4072.A0A1U8EDB4	GO Process	GO:0043170	Macromolecule metabolic process
	T459_10346	4072.A0A1U8EDB4	GO Process	GO:0044238	Primary metabolic process
	T459_10346	4072.A0A1U8EDB4	GO Process	GO:0051604	Protein maturation
	T459_10346	4072.A0A1U8EDB4	GO Process	GO:0071704	Organic substance metabolic process
	T459_10346	4072.A0A1U8EDB4	GO Process	GO:1901564	Organonitrogen compound metabolic process
	T459_10346	4072.A0A1U8EDB4	GO Function	GO:0003824	Catalytic activity
	T459_10346	4072.A0A1U8EDB4	GO Function	GO:0004067	Asparaginase activity
	T459_10346	4072.A0A1U8EDB4	GO Function	GO:0008233	Peptidase activity
	T459_10346	4072.A0A1U8EDB4	GO Function	GO:0008242	Omega peptidase activity
	T459_10346	4072.A0A1U8EDB4	GO Function	GO:0008798	Beta-aspartyl-peptidase activity
	T459_10346	4072.A0A1U8EDB4	GO Function	GO:0016787	Hydrolase activity
	T459_10346	4072.A0A1U8EDB4	GO Function	GO:0016810	Hydrolase activity, acting on carbon-nitrogen (but not peptide) bonds
	T459_10346	4072.A0A1U8EDB4	GO Function	GO:0016811	Hydrolase activity, acting on carbon-nitrogen (but not peptide) bonds, in linear amides
	T459_10346	4072.A0A1U8EDB4	GO Function	GO:0070003	Threonine-type peptidase activity
	T459_10346	4072.A0A1U8EDB4	GO Function	GO:0140096	Catalytic activity, acting on a protein
	T459_10346	4072.A0A1U8EDB4	GO Component	GO:0005622	Intracellular anatomical structure
	T459_10346	4072.A0A1U8EDB4	GO Component	GO:0005737	Cytoplasm
	T459_10346	4072.A0A1U8EDB4	GO Component	GO:0005886	Plasma membrane
	T459_10346	4072.A0A1U8EDB4	GO Component	GO:0016020	Membrane
	T459_10346	4072.A0A1U8EDB4	GO Component	GO:0071944	Cell periphery
	T459_10346	4072.A0A1U8EDB4	GO Component	GO:0110165	Cellular anatomical entity
	T459_10346	4072.A0A1U8EDB4	STRING clusters	CL:14632	Mixed, incl. Glutamine family amino acid metabolic process, and Polyamine biosynthetic process
	T459_10346	4072.A0A1U8EDB4	STRING clusters	CL:14633	Mixed, incl. Glutamine family amino acid metabolic process, and Permease family
	T459_10346	4072.A0A1U8EDB4	STRING clusters	CL:14634	Mixed, incl. Glutamate metabolic process, and Glutamine biosynthetic process
	T459_10346	4072.A0A1U8EDB4	STRING clusters	CL:14635	Glutamate metabolic process, and Glutamine biosynthetic process
	T459_10346	4072.A0A1U8EDB4	STRING clusters	CL:14636	Glutamate metabolic process, and Glutamine biosynthetic process
	T459_10346	4072.A0A1U8EDB4	STRING clusters	CL:14707	L-asparagine metabolic process, and Asparaginase activity
	T459_10346	4072.A0A1U8EDB4	KEGG	cann00250	Alanine, aspartate and glutamate metabolism
	T459_10346	4072.A0A1U8EDB4	KEGG	cann00460	Cyanoamino acid metabolism
	T459_10346	4072.A0A1U8EDB4	KEGG	cann01100	Metabolic pathways
	T459_10346	4072.A0A1U8EDB4	KEGG	cann01110	Biosynthesis of secondary metabolites
	T459_10346	4072.A0A1U8EDB4	Reactome	MAP-1430728	Metabolism
	T459_10346	4072.A0A1U8EDB4	Reactome	MAP-71291	Metabolism of amino acids and derivatives
	T459_10346	4072.A0A1U8EDB4	Reactome	MAP-8963691	Phenylalanine and tyrosine metabolism
	T459_10346	4072.A0A1U8EDB4	Reactome	MAP-8964208	Phenylalanine metabolism
	T459_10346	4072.A0A1U8EDB4	COMPARTMENTS	GOCC:0110165	Cellular anatomical entity
	T459_10346	4072.A0A1U8EDB4	Pfam	PF01112	Asparaginase
	T459_10346	4072.A0A1U8EDB4	InterPro	IPR000246	Peptidase T2, asparaginase 2
	T459_10346	4072.A0A1U8EDB4	InterPro	IPR029055	Nucleophile aminohydrolases, N-terminal
	T459_10919	4072.A0A1U8FU65	GO Process	GO:0008152	Metabolic process
	T459_10919	4072.A0A1U8FU65	GO Process	GO:0009853	Photorespiration
	T459_10919	4072.A0A1U8FU65	GO Process	GO:0009854	Oxidative photosynthetic carbon pathway
	T459_10919	4072.A0A1U8FU65	GO Process	GO:0009987	Cellular process
	T459_10919	4072.A0A1U8FU65	GO Process	GO:0043094	Cellular metabolic compound salvage
	T459_10919	4072.A0A1U8FU65	GO Process	GO:0044237	Cellular metabolic process
	T459_10919	4072.A0A1U8FU65	GO Function	GO:0000166	Nucleotide binding
	T459_10919	4072.A0A1U8FU65	GO Function	GO:0003824	Catalytic activity
	T459_10919	4072.A0A1U8FU65	GO Function	GO:0005488	Binding
	T459_10919	4072.A0A1U8FU65	GO Function	GO:0008465	Glycerate dehydrogenase activity
	T459_10919	4072.A0A1U8FU65	GO Function	GO:0016491	Oxidoreductase activity
	T459_10919	4072.A0A1U8FU65	GO Function	GO:0016614	Oxidoreductase activity, acting on CH-OH group of donors
	T459_10919	4072.A0A1U8FU65	GO Function	GO:0016616	Oxidoreductase activity, acting on the CH-OH group of donors, NAD or NADP as acceptor
	T459_10919	4072.A0A1U8FU65	GO Function	GO:0016618	Hydroxypyruvate reductase activity
	T459_10919	4072.A0A1U8FU65	GO Function	GO:0030267	Glyoxylate reductase (NADP+) activity
	T459_10919	4072.A0A1U8FU65	GO Function	GO:0031406	Carboxylic acid binding
	T459_10919	4072.A0A1U8FU65	GO Function	GO:0033293	Monocarboxylic acid binding
	T459_10919	4072.A0A1U8FU65	GO Function	GO:0036094	Small molecule binding
	T459_10919	4072.A0A1U8FU65	GO Function	GO:0043167	Ion binding
	T459_10919	4072.A0A1U8FU65	GO Function	GO:0043168	Anion binding
	T459_10919	4072.A0A1U8FU65	GO Function	GO:0043177	Organic acid binding
	T459_10919	4072.A0A1U8FU65	GO Function	GO:0047995	Hydroxyphenylpyruvate reductase activity
	T459_10919	4072.A0A1U8FU65	GO Function	GO:0051287	NAD binding
	T459_10919	4072.A0A1U8FU65	GO Function	GO:0097159	Organic cyclic compound binding
	T459_10919	4072.A0A1U8FU65	GO Function	GO:0106345	Glyoxylate reductase activity
	T459_10919	4072.A0A1U8FU65	GO Function	GO:1901265	Nucleoside phosphate binding
	T459_10919	4072.A0A1U8FU65	GO Function	GO:1901363	Heterocyclic compound binding
	T459_10919	4072.A0A1U8FU65	GO Component	GO:0005622	Intracellular anatomical structure
	T459_10919	4072.A0A1U8FU65	GO Component	GO:0005737	Cytoplasm
	T459_10919	4072.A0A1U8FU65	GO Component	GO:0005739	Mitochondrion
	T459_10919	4072.A0A1U8FU65	GO Component	GO:0043226	Organelle
	T459_10919	4072.A0A1U8FU65	GO Component	GO:0043227	Membrane-bounded organelle
	T459_10919	4072.A0A1U8FU65	GO Component	GO:0043229	Intracellular organelle
	T459_10919	4072.A0A1U8FU65	GO Component	GO:0043231	Intracellular membrane-bounded organelle
	T459_10919	4072.A0A1U8FU65	GO Component	GO:0110165	Cellular anatomical entity
	T459_10919	4072.A0A1U8FU65	STRING clusters	CL:14378	Mixed, incl. Aromatic amino acid family biosynthetic process, and Branched-chain amino acid biosynthetic process
	T459_10919	4072.A0A1U8FU65	STRING clusters	CL:14564	Phenylalanine metabolism, and Prephenate dehydrogenase
	T459_10919	4072.A0A1U8FU65	STRING clusters	CL:14565	Phenylalanine, tyrosine and tryptophan biosynthesis, and Tautomerase/MIF superfamily
	T459_10919	4072.A0A1U8FU65	STRING clusters	CL:14595	Tautomerase/MIF superfamily, and Tyrosine/nicotianamine aminotransferase
	T459_10919	4072.A0A1U8FU65	KEGG	cann00130	Ubiquinone and other terpenoid-quinone biosynthesis
	T459_10919	4072.A0A1U8FU65	KEGG	cann00350	Tyrosine metabolism
	T459_10919	4072.A0A1U8FU65	KEGG	cann00360	Phenylalanine metabolism
	T459_10919	4072.A0A1U8FU65	KEGG	cann00960	Tropane, piperidine and pyridine alkaloid biosynthesis
	T459_10919	4072.A0A1U8FU65	KEGG	cann01100	Metabolic pathways
	T459_10919	4072.A0A1U8FU65	KEGG	cann01110	Biosynthesis of secondary metabolites
	T459_10919	4072.A0A1U8FU65	Reactome	MAP-1430728	Metabolism
	T459_10919	4072.A0A1U8FU65	Reactome	MAP-389661	Glyoxylate metabolism and glycine degradation
	T459_10919	4072.A0A1U8FU65	Reactome	MAP-71291	Metabolism of amino acids and derivatives
	T459_10919	4072.A0A1U8FU65	COMPARTMENTS	GOCC:0005622	Intracellular
	T459_10919	4072.A0A1U8FU65	COMPARTMENTS	GOCC:0005737	Cytoplasm
	T459_10919	4072.A0A1U8FU65	COMPARTMENTS	GOCC:0110165	Cellular anatomical entity
	T459_10919	4072.A0A1U8FU65	UniProt Keywords	KW-0560	Oxidoreductase
	T459_10919	4072.A0A1U8FU65	Pfam	PF02826	D-isomer specific 2-hydroxyacid dehydrogenase, NAD binding domain
	T459_10919	4072.A0A1U8FU65	InterPro	IPR006139	D-isomer specific 2-hydroxyacid dehydrogenase, catalytic domain
	T459_10919	4072.A0A1U8FU65	InterPro	IPR006140	D-isomer specific 2-hydroxyacid dehydrogenase, NAD-binding domain
	T459_10919	4072.A0A1U8FU65	InterPro	IPR029752	D-isomer specific 2-hydroxyacid dehydrogenase, NAD-binding domain conserved site 1
	T459_10919	4072.A0A1U8FU65	InterPro	IPR036291	NAD(P)-binding domain superfamily
	T459_11597	4072.A0A2G2ZML9	GO Process	GO:0006355	Regulation of transcription, DNA-templated
	T459_11597	4072.A0A2G2ZML9	GO Process	GO:0009889	Regulation of biosynthetic process
	T459_11597	4072.A0A2G2ZML9	GO Process	GO:0010468	Regulation of gene expression
	T459_11597	4072.A0A2G2ZML9	GO Process	GO:0010556	Regulation of macromolecule biosynthetic process
	T459_11597	4072.A0A2G2ZML9	GO Process	GO:0019219	Regulation of nucleobase-containing compound metabolic process
	T459_11597	4072.A0A2G2ZML9	GO Process	GO:0019222	Regulation of metabolic process
	T459_11597	4072.A0A2G2ZML9	GO Process	GO:0031323	Regulation of cellular metabolic process
	T459_11597	4072.A0A2G2ZML9	GO Process	GO:0031326	Regulation of cellular biosynthetic process
	T459_11597	4072.A0A2G2ZML9	GO Process	GO:0050789	Regulation of biological process
	T459_11597	4072.A0A2G2ZML9	GO Process	GO:0050794	Regulation of cellular process
	T459_11597	4072.A0A2G2ZML9	GO Process	GO:0051171	Regulation of nitrogen compound metabolic process
	T459_11597	4072.A0A2G2ZML9	GO Process	GO:0051252	Regulation of RNA metabolic process
	T459_11597	4072.A0A2G2ZML9	GO Process	GO:0060255	Regulation of macromolecule metabolic process
	T459_11597	4072.A0A2G2ZML9	GO Process	GO:0065007	Biological regulation
	T459_11597	4072.A0A2G2ZML9	GO Process	GO:0080090	Regulation of primary metabolic process
	T459_11597	4072.A0A2G2ZML9	GO Process	GO:1903506	Regulation of nucleic acid-templated transcription
	T459_11597	4072.A0A2G2ZML9	GO Process	GO:2001141	Regulation of RNA biosynthetic process
	T459_11597	4072.A0A2G2ZML9	GO Function	GO:0003676	Nucleic acid binding
	T459_11597	4072.A0A2G2ZML9	GO Function	GO:0003677	DNA binding
	T459_11597	4072.A0A2G2ZML9	GO Function	GO:0003700	DNA-binding transcription factor activity
	T459_11597	4072.A0A2G2ZML9	GO Function	GO:0005488	Binding
	T459_11597	4072.A0A2G2ZML9	GO Function	GO:0008270	Zinc ion binding
	T459_11597	4072.A0A2G2ZML9	GO Function	GO:0043167	Ion binding
	T459_11597	4072.A0A2G2ZML9	GO Function	GO:0043169	Cation binding
	T459_11597	4072.A0A2G2ZML9	GO Function	GO:0043565	Sequence-specific DNA binding
	T459_11597	4072.A0A2G2ZML9	GO Function	GO:0046872	Metal ion binding
	T459_11597	4072.A0A2G2ZML9	GO Function	GO:0046914	Transition metal ion binding
	T459_11597	4072.A0A2G2ZML9	GO Function	GO:0097159	Organic cyclic compound binding
	T459_11597	4072.A0A2G2ZML9	GO Function	GO:0140110	Transcription regulator activity
	T459_11597	4072.A0A2G2ZML9	GO Function	GO:1901363	Heterocyclic compound binding
	T459_11597	4072.A0A2G2ZML9	GO Component	GO:0005622	Intracellular anatomical structure
	T459_11597	4072.A0A2G2ZML9	GO Component	GO:0005634	Nucleus
	T459_11597	4072.A0A2G2ZML9	GO Component	GO:0043226	Organelle
	T459_11597	4072.A0A2G2ZML9	GO Component	GO:0043227	Membrane-bounded organelle
	T459_11597	4072.A0A2G2ZML9	GO Component	GO:0043229	Intracellular organelle
	T459_11597	4072.A0A2G2ZML9	GO Component	GO:0043231	Intracellular membrane-bounded organelle
	T459_11597	4072.A0A2G2ZML9	GO Component	GO:0110165	Cellular anatomical entity
	T459_11597	4072.A0A2G2ZML9	STRING clusters	CL:44485	Mostly uncharacterized, incl. Homeobox-leucine zipper protein GLABRA2/ANL2/PDF2/ATML1-like, and COBRA, plant
	T459_11597	4072.A0A2G2ZML9	STRING clusters	CL:44487	Mostly uncharacterized, incl. Homeobox-leucine zipper protein GLABRA2/ANL2/PDF2/ATML1-like, and COBRA, plant
	T459_11597	4072.A0A2G2ZML9	STRING clusters	CL:44489	Mostly uncharacterized, incl. Homeobox-leucine zipper protein GLABRA2/ANL2/PDF2/ATML1-like, and COBRA, plant
	T459_11597	4072.A0A2G2ZML9	STRING clusters	CL:44490	Mixed, incl. Homeobox-leucine zipper protein GLABRA2/ANL2/PDF2/ATML1-like, and COBRA, plant
	T459_11597	4072.A0A2G2ZML9	STRING clusters	CL:44491	Mostly uncharacterized, incl. Homeobox-leucine zipper protein GLABRA2/ANL2/PDF2/ATML1-like, and Plant peroxidase
	T459_11597	4072.A0A2G2ZML9	STRING clusters	CL:44492	Mostly uncharacterized, incl. Homeobox-leucine zipper protein GLABRA2/ANL2/PDF2/ATML1-like, and Plus-end-directed microtubule motor activity
	T459_11597	4072.A0A2G2ZML9	STRING clusters	CL:44495	Mostly uncharacterized, incl. Homeobox-leucine zipper protein GLABRA2/ANL2/PDF2/ATML1-like, and Plus-end-directed microtubule motor activity
	T459_11597	4072.A0A2G2ZML9	STRING clusters	CL:44498	Mostly uncharacterized, incl. Homeobox-leucine zipper protein GLABRA2/ANL2/PDF2/ATML1-like, and Plus-end-directed microtubule motor activity
	T459_11597	4072.A0A2G2ZML9	STRING clusters	CL:44501	Mostly uncharacterized, incl. Homeobox-leucine zipper protein GLABRA2/ANL2/PDF2/ATML1-like, and Plus-end-directed microtubule motor activity
	T459_11597	4072.A0A2G2ZML9	STRING clusters	CL:44503	Mostly uncharacterized, incl. Homeobox-leucine zipper protein GLABRA2/ANL2/PDF2/ATML1-like, and Plus-end-directed microtubule motor activity
	T459_11597	4072.A0A2G2ZML9	STRING clusters	CL:44505	Mostly uncharacterized, incl. Homeobox-leucine zipper protein GLABRA2/ANL2/PDF2/ATML1-like, and Plus-end-directed microtubule motor activity
	T459_11597	4072.A0A2G2ZML9	STRING clusters	CL:44507	Mostly uncharacterized, incl. Homeobox-leucine zipper protein GLABRA2/ANL2/PDF2/ATML1-like, and Plus-end-directed microtubule motor activity
	T459_11597	4072.A0A2G2ZML9	STRING clusters	CL:44508	Mostly uncharacterized, incl. Homeobox-leucine zipper protein GLABRA2/ANL2/PDF2/ATML1-like, and Plus-end-directed microtubule motor activity
	T459_11597	4072.A0A2G2ZML9	STRING clusters	CL:44578	Mixed, incl. Cold-regulated 413 protein, and Homeobox-leucine zipper protein GLABRA2/ANL2/PDF2/ATML1-like
	T459_11597	4072.A0A2G2ZML9	STRING clusters	CL:44596	Homeobox-leucine zipper protein GLABRA2/ANL2/PDF2/ATML1-like, and COBRA-like protein
	T459_11597	4072.A0A2G2ZML9	Reactome	MAP-109582	Hemostasis
	T459_11597	4072.A0A2G2ZML9	Reactome	MAP-983231	Factors involved in megakaryocyte development and platelet production
	T459_11597	4072.A0A2G2ZML9	COMPARTMENTS	GOCC:0005576	Extracellular region
	T459_11597	4072.A0A2G2ZML9	COMPARTMENTS	GOCC:0005615	Extracellular space
	T459_11597	4072.A0A2G2ZML9	COMPARTMENTS	GOCC:0005886	Plasma membrane
	T459_11597	4072.A0A2G2ZML9	COMPARTMENTS	GOCC:0005887	Integral component of plasma membrane
	T459_11597	4072.A0A2G2ZML9	COMPARTMENTS	GOCC:0005898	interleukin-13 receptor complex
	T459_11597	4072.A0A2G2ZML9	COMPARTMENTS	GOCC:0016020	Membrane
	T459_11597	4072.A0A2G2ZML9	COMPARTMENTS	GOCC:0016021	Integral component of membrane
	T459_11597	4072.A0A2G2ZML9	COMPARTMENTS	GOCC:0031224	Intrinsic component of membrane
	T459_11597	4072.A0A2G2ZML9	COMPARTMENTS	GOCC:0031226	Intrinsic component of plasma membrane
	T459_11597	4072.A0A2G2ZML9	COMPARTMENTS	GOCC:0032991	Protein-containing complex
	T459_11597	4072.A0A2G2ZML9	COMPARTMENTS	GOCC:0043235	Receptor complex
	T459_11597	4072.A0A2G2ZML9	COMPARTMENTS	GOCC:0048180	Activin complex
	T459_11597	4072.A0A2G2ZML9	COMPARTMENTS	GOCC:0048183	Activin AB complex
	T459_11597	4072.A0A2G2ZML9	COMPARTMENTS	GOCC:0071944	Cell periphery
	T459_11597	4072.A0A2G2ZML9	COMPARTMENTS	GOCC:0098796	Membrane protein complex
	T459_11597	4072.A0A2G2ZML9	COMPARTMENTS	GOCC:0098797	Plasma membrane protein complex
	T459_11597	4072.A0A2G2ZML9	COMPARTMENTS	GOCC:0098802	Plasma membrane signaling receptor complex
	T459_11597	4072.A0A2G2ZML9	COMPARTMENTS	GOCC:0110165	Cellular anatomical entity
	T459_11773	4072.A0A2G2ZMV7	GO Process	GO:0006518	Peptide metabolic process
	T459_11773	4072.A0A2G2ZMV7	GO Process	GO:0006575	Cellular modified amino acid metabolic process
	T459_11773	4072.A0A2G2ZMV7	GO Process	GO:0006749	Glutathione metabolic process
	T459_11773	4072.A0A2G2ZMV7	GO Process	GO:0006751	Glutathione catabolic process
	T459_11773	4072.A0A2G2ZMV7	GO Process	GO:0006790	Sulfur compound metabolic process
	T459_11773	4072.A0A2G2ZMV7	GO Process	GO:0006807	Nitrogen compound metabolic process
	T459_11773	4072.A0A2G2ZMV7	GO Process	GO:0008152	Metabolic process
	T459_11773	4072.A0A2G2ZMV7	GO Process	GO:0009056	Catabolic process
	T459_11773	4072.A0A2G2ZMV7	GO Process	GO:0009987	Cellular process
	T459_11773	4072.A0A2G2ZMV7	GO Process	GO:0034641	Cellular nitrogen compound metabolic process
	T459_11773	4072.A0A2G2ZMV7	GO Process	GO:0042219	Cellular modified amino acid catabolic process
	T459_11773	4072.A0A2G2ZMV7	GO Process	GO:0043171	Peptide catabolic process
	T459_11773	4072.A0A2G2ZMV7	GO Process	GO:0043603	Cellular amide metabolic process
	T459_11773	4072.A0A2G2ZMV7	GO Process	GO:0044237	Cellular metabolic process
	T459_11773	4072.A0A2G2ZMV7	GO Process	GO:0044248	Cellular catabolic process
	T459_11773	4072.A0A2G2ZMV7	GO Process	GO:0044273	Sulfur compound catabolic process
	T459_11773	4072.A0A2G2ZMV7	GO Process	GO:0071704	Organic substance metabolic process
	T459_11773	4072.A0A2G2ZMV7	GO Process	GO:1901564	Organonitrogen compound metabolic process
	T459_11773	4072.A0A2G2ZMV7	GO Process	GO:1901565	Organonitrogen compound catabolic process
	T459_11773	4072.A0A2G2ZMV7	GO Process	GO:1901575	Organic substance catabolic process
	T459_11773	4072.A0A2G2ZMV7	GO Function	GO:0003824	Catalytic activity
	T459_11773	4072.A0A2G2ZMV7	GO Function	GO:0003839	Gamma-glutamylcyclotransferase activity
	T459_11773	4072.A0A2G2ZMV7	GO Function	GO:0016829	Lyase activity
	T459_11773	4072.A0A2G2ZMV7	GO Function	GO:0016840	Carbon-nitrogen lyase activity
	T459_11773	4072.A0A2G2ZMV7	GO Function	GO:0016842	Amidine-lyase activity
	T459_11773	4072.A0A2G2ZMV7	GO Component	GO:0005622	Intracellular anatomical structure
	T459_11773	4072.A0A2G2ZMV7	GO Component	GO:0005737	Cytoplasm
	T459_11773	4072.A0A2G2ZMV7	GO Component	GO:0005829	Cytosol
	T459_11773	4072.A0A2G2ZMV7	GO Component	GO:0110165	Cellular anatomical entity
	T459_11773	4072.A0A2G2ZMV7	STRING clusters	CL:19007	Glutathione metabolism, and L-ascorbic acid biosynthetic process
	T459_11773	4072.A0A2G2ZMV7	STRING clusters	CL:19008	Glutathione metabolism, and L-ascorbic acid biosynthetic process
	T459_11773	4072.A0A2G2ZMV7	STRING clusters	CL:19009	Glutathione metabolism, and L-ascorbic acid biosynthetic process
	T459_11773	4072.A0A2G2ZMV7	STRING clusters	CL:19011	Glutathione metabolism, and L-ascorbic acid biosynthetic process
	T459_11773	4072.A0A2G2ZMV7	STRING clusters	CL:19012	Glutathione metabolism
	T459_11773	4072.A0A2G2ZMV7	STRING clusters	CL:19013	Glutathione metabolism
	T459_11773	4072.A0A2G2ZMV7	STRING clusters	CL:19018	Glutathione metabolism
	T459_11773	4072.A0A2G2ZMV7	STRING clusters	CL:19023	Glutathione metabolism
	T459_11773	4072.A0A2G2ZMV7	STRING clusters	CL:19028	Glutathione metabolism
	T459_11773	4072.A0A2G2ZMV7	STRING clusters	CL:19033	Glutathione metabolism
	T459_11773	4072.A0A2G2ZMV7	STRING clusters	CL:19038	Glutathione metabolism
	T459_11773	4072.A0A2G2ZMV7	STRING clusters	CL:19043	Glutathione metabolism
	T459_11773	4072.A0A2G2ZMV7	STRING clusters	CL:19048	Glutathione metabolism
	T459_11773	4072.A0A2G2ZMV7	KEGG	cann00480	Glutathione metabolism
	T459_11773	4072.A0A2G2ZMV7	KEGG	cann01100	Metabolic pathways
	T459_11773	4072.A0A2G2ZMV7	Reactome	MAP-1430728	Metabolism
	T459_11773	4072.A0A2G2ZMV7	Reactome	MAP-156580	Phase II - Conjugation of compounds
	T459_11773	4072.A0A2G2ZMV7	Reactome	MAP-156590	Glutathione conjugation
	T459_11773	4072.A0A2G2ZMV7	Reactome	MAP-174403	Glutathione synthesis and recycling
	T459_11773	4072.A0A2G2ZMV7	Reactome	MAP-211859	Biological oxidations
	T459_11773	4072.A0A2G2ZMV7	COMPARTMENTS	GOCC:0005622	Intracellular
	T459_11773	4072.A0A2G2ZMV7	COMPARTMENTS	GOCC:0005737	Cytoplasm
	T459_11773	4072.A0A2G2ZMV7	COMPARTMENTS	GOCC:0005829	Cytosol
	T459_11773	4072.A0A2G2ZMV7	COMPARTMENTS	GOCC:0005886	Plasma membrane
	T459_11773	4072.A0A2G2ZMV7	COMPARTMENTS	GOCC:0016020	Membrane
	T459_11773	4072.A0A2G2ZMV7	COMPARTMENTS	GOCC:0016021	Integral component of membrane
	T459_11773	4072.A0A2G2ZMV7	COMPARTMENTS	GOCC:0031224	Intrinsic component of membrane
	T459_11773	4072.A0A2G2ZMV7	COMPARTMENTS	GOCC:0032991	Protein-containing complex
	T459_11773	4072.A0A2G2ZMV7	COMPARTMENTS	GOCC:0043190	ATP-binding cassette (ABC) transporter complex
	T459_11773	4072.A0A2G2ZMV7	COMPARTMENTS	GOCC:0071944	Cell periphery
	T459_11773	4072.A0A2G2ZMV7	COMPARTMENTS	GOCC:0098533	ATPase dependent transmembrane transport complex
	T459_11773	4072.A0A2G2ZMV7	COMPARTMENTS	GOCC:0098796	Membrane protein complex
	T459_11773	4072.A0A2G2ZMV7	COMPARTMENTS	GOCC:0098797	Plasma membrane protein complex
	T459_11773	4072.A0A2G2ZMV7	COMPARTMENTS	GOCC:0110165	Cellular anatomical entity
	T459_11773	4072.A0A2G2ZMV7	COMPARTMENTS	GOCC:1902495	Transmembrane transporter complex
	T459_11773	4072.A0A2G2ZMV7	COMPARTMENTS	GOCC:1902509	Methionine-importing complex
	T459_11773	4072.A0A2G2ZMV7	COMPARTMENTS	GOCC:1990197	ATP-dependent methionine-importing complex
	T459_11773	4072.A0A2G2ZMV7	COMPARTMENTS	GOCC:1990351	Transporter complex
	T459_11773	4072.A0A2G2ZMV7	Pfam	PF04752	ChaC-like protein
	T459_11773	4072.A0A2G2ZMV7	InterPro	IPR006840	Glutathione-specific gamma-glutamylcyclotransferase
	T459_11773	4072.A0A2G2ZMV7	InterPro	IPR013024	Gamma-glutamyl cyclotransferase-like
	T459_11773	4072.A0A2G2ZMV7	InterPro	IPR036568	Gamma-glutamyl cyclotransferase-like superfamily
	T459_11789	4072.A0A1U8GGB0	GO Process	GO:0006082	Organic acid metabolic process
	T459_11789	4072.A0A1U8GGB0	GO Process	GO:0006520	Cellular amino acid metabolic process
	T459_11789	4072.A0A1U8GGB0	GO Process	GO:0006725	Cellular aromatic compound metabolic process
	T459_11789	4072.A0A1U8GGB0	GO Process	GO:0006807	Nitrogen compound metabolic process
	T459_11789	4072.A0A1U8GGB0	GO Process	GO:0008152	Metabolic process
	T459_11789	4072.A0A1U8GGB0	GO Process	GO:0009058	Biosynthetic process
	T459_11789	4072.A0A1U8GGB0	GO Process	GO:0009987	Cellular process
	T459_11789	4072.A0A1U8GGB0	GO Process	GO:0018958	Phenol-containing compound metabolic process
	T459_11789	4072.A0A1U8GGB0	GO Process	GO:0019438	Aromatic compound biosynthetic process
	T459_11789	4072.A0A1U8GGB0	GO Process	GO:0019752	Carboxylic acid metabolic process
	T459_11789	4072.A0A1U8GGB0	GO Process	GO:0043436	Oxoacid metabolic process
	T459_11789	4072.A0A1U8GGB0	GO Process	GO:0044237	Cellular metabolic process
	T459_11789	4072.A0A1U8GGB0	GO Process	GO:0044238	Primary metabolic process
	T459_11789	4072.A0A1U8GGB0	GO Process	GO:0044249	Cellular biosynthetic process
	T459_11789	4072.A0A1U8GGB0	GO Process	GO:0044281	Small molecule metabolic process
	T459_11789	4072.A0A1U8GGB0	GO Process	GO:0046189	Phenol-containing compound biosynthetic process
	T459_11789	4072.A0A1U8GGB0	GO Process	GO:0071704	Organic substance metabolic process
	T459_11789	4072.A0A1U8GGB0	GO Process	GO:1901160	Primary amino compound metabolic process
	T459_11789	4072.A0A1U8GGB0	GO Process	GO:1901162	Primary amino compound biosynthetic process
	T459_11789	4072.A0A1U8GGB0	GO Process	GO:1901360	Organic cyclic compound metabolic process
	T459_11789	4072.A0A1U8GGB0	GO Process	GO:1901362	Organic cyclic compound biosynthetic process
	T459_11789	4072.A0A1U8GGB0	GO Process	GO:1901564	Organonitrogen compound metabolic process
	T459_11789	4072.A0A1U8GGB0	GO Process	GO:1901566	Organonitrogen compound biosynthetic process
	T459_11789	4072.A0A1U8GGB0	GO Process	GO:1901576	Organic substance biosynthetic process
	T459_11789	4072.A0A1U8GGB0	GO Process	GO:1901615	Organic hydroxy compound metabolic process
	T459_11789	4072.A0A1U8GGB0	GO Process	GO:1901617	Organic hydroxy compound biosynthetic process
	T459_11789	4072.A0A1U8GGB0	GO Function	GO:0003824	Catalytic activity
	T459_11789	4072.A0A1U8GGB0	GO Function	GO:0005488	Binding
	T459_11789	4072.A0A1U8GGB0	GO Function	GO:0016829	Lyase activity
	T459_11789	4072.A0A1U8GGB0	GO Function	GO:0016830	Carbon-carbon lyase activity
	T459_11789	4072.A0A1U8GGB0	GO Function	GO:0016831	Carboxy-lyase activity
	T459_11789	4072.A0A1U8GGB0	GO Function	GO:0019842	Vitamin binding
	T459_11789	4072.A0A1U8GGB0	GO Function	GO:0030170	Pyridoxal phosphate binding
	T459_11789	4072.A0A1U8GGB0	GO Function	GO:0036094	Small molecule binding
	T459_11789	4072.A0A1U8GGB0	GO Function	GO:0043167	Ion binding
	T459_11789	4072.A0A1U8GGB0	GO Function	GO:0043168	Anion binding
	T459_11789	4072.A0A1U8GGB0	GO Function	GO:0070279	Vitamin B6 binding
	T459_11789	4072.A0A1U8GGB0	GO Function	GO:0097159	Organic cyclic compound binding
	T459_11789	4072.A0A1U8GGB0	GO Function	GO:1901363	Heterocyclic compound binding
	T459_11789	4072.A0A1U8GGB0	GO Component	GO:0005622	Intracellular anatomical structure
	T459_11789	4072.A0A1U8GGB0	GO Component	GO:0005737	Cytoplasm
	T459_11789	4072.A0A1U8GGB0	GO Component	GO:0110165	Cellular anatomical entity
	T459_11789	4072.A0A1U8GGB0	STRING clusters	CL:14378	Mixed, incl. Aromatic amino acid family biosynthetic process, and Branched-chain amino acid biosynthetic process
	T459_11789	4072.A0A1U8GGB0	STRING clusters	CL:14564	Phenylalanine metabolism, and Prephenate dehydrogenase
	T459_11789	4072.A0A1U8GGB0	STRING clusters	CL:14604	Pyridoxal-phosphate binding site, and Acetyltransferase NSI-like
	T459_11789	4072.A0A1U8GGB0	STRING clusters	CL:14606	Aromatic-L-amino-acid decarboxylase, and Phenylpropanoid metabolism
	T459_11789	4072.A0A1U8GGB0	KEGG	cann00360	Phenylalanine metabolism
	T459_11789	4072.A0A1U8GGB0	KEGG	cann01100	Metabolic pathways
	T459_11789	4072.A0A1U8GGB0	Reactome	MAP-1430728	Metabolism
	T459_11789	4072.A0A1U8GGB0	Reactome	MAP-71291	Metabolism of amino acids and derivatives
	T459_11789	4072.A0A1U8GGB0	COMPARTMENTS	GOCC:0005622	Intracellular
	T459_11789	4072.A0A1U8GGB0	COMPARTMENTS	GOCC:0005737	Cytoplasm
	T459_11789	4072.A0A1U8GGB0	COMPARTMENTS	GOCC:0110165	Cellular anatomical entity
	T459_11789	4072.A0A1U8GGB0	UniProt Keywords	KW-0456	Lyase
	T459_11789	4072.A0A1U8GGB0	UniProt Keywords	KW-0663	Pyridoxal phosphate
	T459_11789	4072.A0A1U8GGB0	Pfam	PF00282	Pyridoxal-dependent decarboxylase conserved domain
	T459_11789	4072.A0A1U8GGB0	InterPro	IPR002129	Pyridoxal phosphate-dependent decarboxylase
	T459_11789	4072.A0A1U8GGB0	InterPro	IPR010977	Aromatic-L-amino-acid decarboxylase
	T459_11789	4072.A0A1U8GGB0	InterPro	IPR015421	Pyridoxal phosphate-dependent transferase, major domain
	T459_11789	4072.A0A1U8GGB0	InterPro	IPR015422	Pyridoxal phosphate-dependent transferase, small domain
	T459_11789	4072.A0A1U8GGB0	InterPro	IPR015424	Pyridoxal phosphate-dependent transferase
	T459_11789	4072.A0A1U8GGB0	InterPro	IPR021115	Pyridoxal-phosphate binding site
	T459_12062	4072.A0A2G2ZNQ4	GO Process	GO:0006082	Organic acid metabolic process
	T459_12062	4072.A0A2G2ZNQ4	GO Process	GO:0006520	Cellular amino acid metabolic process
	T459_12062	4072.A0A2G2ZNQ4	GO Process	GO:0006725	Cellular aromatic compound metabolic process
	T459_12062	4072.A0A2G2ZNQ4	GO Process	GO:0006807	Nitrogen compound metabolic process
	T459_12062	4072.A0A2G2ZNQ4	GO Process	GO:0008152	Metabolic process
	T459_12062	4072.A0A2G2ZNQ4	GO Process	GO:0009058	Biosynthetic process
	T459_12062	4072.A0A2G2ZNQ4	GO Process	GO:0009987	Cellular process
	T459_12062	4072.A0A2G2ZNQ4	GO Process	GO:0019752	Carboxylic acid metabolic process
	T459_12062	4072.A0A2G2ZNQ4	GO Process	GO:0042180	Cellular ketone metabolic process
	T459_12062	4072.A0A2G2ZNQ4	GO Process	GO:0042537	Benzene-containing compound metabolic process
	T459_12062	4072.A0A2G2ZNQ4	GO Process	GO:0043436	Oxoacid metabolic process
	T459_12062	4072.A0A2G2ZNQ4	GO Process	GO:0044237	Cellular metabolic process
	T459_12062	4072.A0A2G2ZNQ4	GO Process	GO:0044238	Primary metabolic process
	T459_12062	4072.A0A2G2ZNQ4	GO Process	GO:0044281	Small molecule metabolic process
	T459_12062	4072.A0A2G2ZNQ4	GO Process	GO:0070189	Kynurenine metabolic process
	T459_12062	4072.A0A2G2ZNQ4	GO Process	GO:0071704	Organic substance metabolic process
	T459_12062	4072.A0A2G2ZNQ4	GO Process	GO:0097052	L-kynurenine metabolic process
	T459_12062	4072.A0A2G2ZNQ4	GO Process	GO:1901360	Organic cyclic compound metabolic process
	T459_12062	4072.A0A2G2ZNQ4	GO Process	GO:1901564	Organonitrogen compound metabolic process
	T459_12062	4072.A0A2G2ZNQ4	GO Process	GO:1901605	Alpha-amino acid metabolic process
	T459_12062	4072.A0A2G2ZNQ4	GO Function	GO:0003824	Catalytic activity
	T459_12062	4072.A0A2G2ZNQ4	GO Function	GO:0005488	Binding
	T459_12062	4072.A0A2G2ZNQ4	GO Function	GO:0008483	Transaminase activity
	T459_12062	4072.A0A2G2ZNQ4	GO Function	GO:0016212	Kynurenine-oxoglutarate transaminase activity
	T459_12062	4072.A0A2G2ZNQ4	GO Function	GO:0016740	Transferase activity
	T459_12062	4072.A0A2G2ZNQ4	GO Function	GO:0016769	Transferase activity, transferring nitrogenous groups
	T459_12062	4072.A0A2G2ZNQ4	GO Function	GO:0019842	Vitamin binding
	T459_12062	4072.A0A2G2ZNQ4	GO Function	GO:0030170	Pyridoxal phosphate binding
	T459_12062	4072.A0A2G2ZNQ4	GO Function	GO:0036094	Small molecule binding
	T459_12062	4072.A0A2G2ZNQ4	GO Function	GO:0036137	Kynurenine aminotransferase activity
	T459_12062	4072.A0A2G2ZNQ4	GO Function	GO:0043167	Ion binding
	T459_12062	4072.A0A2G2ZNQ4	GO Function	GO:0043168	Anion binding
	T459_12062	4072.A0A2G2ZNQ4	GO Function	GO:0070279	Vitamin B6 binding
	T459_12062	4072.A0A2G2ZNQ4	GO Function	GO:0097159	Organic cyclic compound binding
	T459_12062	4072.A0A2G2ZNQ4	GO Function	GO:1901363	Heterocyclic compound binding
	T459_12062	4072.A0A2G2ZNQ4	GO Component	GO:0005622	Intracellular anatomical structure
	T459_12062	4072.A0A2G2ZNQ4	GO Component	GO:0005737	Cytoplasm
	T459_12062	4072.A0A2G2ZNQ4	GO Component	GO:0009507	Chloroplast
	T459_12062	4072.A0A2G2ZNQ4	GO Component	GO:0009536	Plastid
	T459_12062	4072.A0A2G2ZNQ4	GO Component	GO:0043226	Organelle
	T459_12062	4072.A0A2G2ZNQ4	GO Component	GO:0043227	Membrane-bounded organelle
	T459_12062	4072.A0A2G2ZNQ4	GO Component	GO:0043229	Intracellular organelle
	T459_12062	4072.A0A2G2ZNQ4	GO Component	GO:0043231	Intracellular membrane-bounded organelle
	T459_12062	4072.A0A2G2ZNQ4	GO Component	GO:0110165	Cellular anatomical entity
	T459_12062	4072.A0A2G2ZNQ4	STRING clusters	CL:14032	Mixed, incl. One-carbon metabolic process, and Serine family amino acid metabolic process
	T459_12062	4072.A0A2G2ZNQ4	STRING clusters	CL:14033	Mixed, incl. One-carbon metabolic process, and Sulfur amino acid metabolic process
	T459_12062	4072.A0A2G2ZNQ4	STRING clusters	CL:14218	Sulfur amino acid biosynthetic process, and Adenosylhomocysteinase-like
	T459_12062	4072.A0A2G2ZNQ4	STRING clusters	CL:14220	Methionine metabolic process, and Adenosylhomocysteinase-like
	T459_12062	4072.A0A2G2ZNQ4	STRING clusters	CL:14222	Methionine metabolic process, and Adenosylhomocysteinase-like
	T459_12062	4072.A0A2G2ZNQ4	STRING clusters	CL:14225	Mixed, incl. Methionine metabolic process, and 4-hydroxy-3-methylbut-2-en-1-yl diphosphate reductase activity
	T459_12062	4072.A0A2G2ZNQ4	STRING clusters	CL:14227	Methionine metabolic process, and One-carbon metabolism
	T459_12062	4072.A0A2G2ZNQ4	STRING clusters	CL:14255	Mixed, incl. S-adenosylmethionine synthetase, and Cobalamin-independent methionine synthase
	T459_12062	4072.A0A2G2ZNQ4	KEGG	cann00270	Cysteine and methionine metabolism
	T459_12062	4072.A0A2G2ZNQ4	KEGG	cann01100	Metabolic pathways
	T459_12062	4072.A0A2G2ZNQ4	Reactome	MAP-1430728	Metabolism
	T459_12062	4072.A0A2G2ZNQ4	Reactome	MAP-71291	Metabolism of amino acids and derivatives
	T459_12062	4072.A0A2G2ZNQ4	COMPARTMENTS	GOCC:0005622	Intracellular
	T459_12062	4072.A0A2G2ZNQ4	COMPARTMENTS	GOCC:0005737	Cytoplasm
	T459_12062	4072.A0A2G2ZNQ4	COMPARTMENTS	GOCC:0009507	Chloroplast
	T459_12062	4072.A0A2G2ZNQ4	COMPARTMENTS	GOCC:0009536	Plastid
	T459_12062	4072.A0A2G2ZNQ4	COMPARTMENTS	GOCC:0043226	Organelle
	T459_12062	4072.A0A2G2ZNQ4	COMPARTMENTS	GOCC:0043227	Membrane-bounded organelle
	T459_12062	4072.A0A2G2ZNQ4	COMPARTMENTS	GOCC:0043229	Intracellular organelle
	T459_12062	4072.A0A2G2ZNQ4	COMPARTMENTS	GOCC:0043231	Intracellular membrane-bounded organelle
	T459_12062	4072.A0A2G2ZNQ4	COMPARTMENTS	GOCC:0110165	Cellular anatomical entity
	T459_12062	4072.A0A2G2ZNQ4	Pfam	PF01041	DegT/DnrJ/EryC1/StrS aminotransferase family
	T459_12062	4072.A0A2G2ZNQ4	InterPro	IPR004839	Aminotransferase, class I/classII
	T459_12062	4072.A0A2G2ZNQ4	InterPro	IPR015421	Pyridoxal phosphate-dependent transferase, major domain
	T459_12062	4072.A0A2G2ZNQ4	InterPro	IPR015422	Pyridoxal phosphate-dependent transferase, small domain
	T459_12062	4072.A0A2G2ZNQ4	InterPro	IPR015424	Pyridoxal phosphate-dependent transferase
	T459_13030	4072.A0A1U8GBW5	GO Process	GO:0006355	Regulation of transcription, DNA-templated
	T459_13030	4072.A0A1U8GBW5	GO Process	GO:0006357	Regulation of transcription by RNA polymerase II
	T459_13030	4072.A0A1U8GBW5	GO Process	GO:0006476	Protein deacetylation
	T459_13030	4072.A0A1U8GBW5	GO Process	GO:0006807	Nitrogen compound metabolic process
	T459_13030	4072.A0A1U8GBW5	GO Process	GO:0006950	Response to stress
	T459_13030	4072.A0A1U8GBW5	GO Process	GO:0008152	Metabolic process
	T459_13030	4072.A0A1U8GBW5	GO Process	GO:0009266	Response to temperature stimulus
	T459_13030	4072.A0A1U8GBW5	GO Process	GO:0009409	Response to cold
	T459_13030	4072.A0A1U8GBW5	GO Process	GO:0009628	Response to abiotic stimulus
	T459_13030	4072.A0A1U8GBW5	GO Process	GO:0009889	Regulation of biosynthetic process
	T459_13030	4072.A0A1U8GBW5	GO Process	GO:0009890	Negative regulation of biosynthetic process
	T459_13030	4072.A0A1U8GBW5	GO Process	GO:0009892	Negative regulation of metabolic process
	T459_13030	4072.A0A1U8GBW5	GO Process	GO:0010468	Regulation of gene expression
	T459_13030	4072.A0A1U8GBW5	GO Process	GO:0010556	Regulation of macromolecule biosynthetic process
	T459_13030	4072.A0A1U8GBW5	GO Process	GO:0010558	Negative regulation of macromolecule biosynthetic process
	T459_13030	4072.A0A1U8GBW5	GO Process	GO:0010605	Negative regulation of macromolecule metabolic process
	T459_13030	4072.A0A1U8GBW5	GO Process	GO:0016570	Histone modification
	T459_13030	4072.A0A1U8GBW5	GO Process	GO:0016575	Histone deacetylation
	T459_13030	4072.A0A1U8GBW5	GO Process	GO:0019219	Regulation of nucleobase-containing compound metabolic process
	T459_13030	4072.A0A1U8GBW5	GO Process	GO:0019222	Regulation of metabolic process
	T459_13030	4072.A0A1U8GBW5	GO Process	GO:0019538	Protein metabolic process
	T459_13030	4072.A0A1U8GBW5	GO Process	GO:0031323	Regulation of cellular metabolic process
	T459_13030	4072.A0A1U8GBW5	GO Process	GO:0031324	Negative regulation of cellular metabolic process
	T459_13030	4072.A0A1U8GBW5	GO Process	GO:0031326	Regulation of cellular biosynthetic process
	T459_13030	4072.A0A1U8GBW5	GO Process	GO:0031327	Negative regulation of cellular biosynthetic process
	T459_13030	4072.A0A1U8GBW5	GO Process	GO:0035601	Protein deacylation
	T459_13030	4072.A0A1U8GBW5	GO Process	GO:0036211	Protein modification process
	T459_13030	4072.A0A1U8GBW5	GO Process	GO:0043170	Macromolecule metabolic process
	T459_13030	4072.A0A1U8GBW5	GO Process	GO:0043412	Macromolecule modification
	T459_13030	4072.A0A1U8GBW5	GO Process	GO:0044238	Primary metabolic process
	T459_13030	4072.A0A1U8GBW5	GO Process	GO:0045892	Negative regulation of transcription, DNA-templated
	T459_13030	4072.A0A1U8GBW5	GO Process	GO:0045934	Negative regulation of nucleobase-containing compound metabolic process
	T459_13030	4072.A0A1U8GBW5	GO Process	GO:0048519	Negative regulation of biological process
	T459_13030	4072.A0A1U8GBW5	GO Process	GO:0048523	Negative regulation of cellular process
	T459_13030	4072.A0A1U8GBW5	GO Process	GO:0050789	Regulation of biological process
	T459_13030	4072.A0A1U8GBW5	GO Process	GO:0050794	Regulation of cellular process
	T459_13030	4072.A0A1U8GBW5	GO Process	GO:0050896	Response to stimulus
	T459_13030	4072.A0A1U8GBW5	GO Process	GO:0051171	Regulation of nitrogen compound metabolic process
	T459_13030	4072.A0A1U8GBW5	GO Process	GO:0051172	Negative regulation of nitrogen compound metabolic process
	T459_13030	4072.A0A1U8GBW5	GO Process	GO:0051252	Regulation of RNA metabolic process
	T459_13030	4072.A0A1U8GBW5	GO Process	GO:0051253	Negative regulation of RNA metabolic process
	T459_13030	4072.A0A1U8GBW5	GO Process	GO:0060255	Regulation of macromolecule metabolic process
	T459_13030	4072.A0A1U8GBW5	GO Process	GO:0065007	Biological regulation
	T459_13030	4072.A0A1U8GBW5	GO Process	GO:0071704	Organic substance metabolic process
	T459_13030	4072.A0A1U8GBW5	GO Process	GO:0080090	Regulation of primary metabolic process
	T459_13030	4072.A0A1U8GBW5	GO Process	GO:0098732	Macromolecule deacylation
	T459_13030	4072.A0A1U8GBW5	GO Process	GO:1901564	Organonitrogen compound metabolic process
	T459_13030	4072.A0A1U8GBW5	GO Process	GO:1902679	Negative regulation of RNA biosynthetic process
	T459_13030	4072.A0A1U8GBW5	GO Process	GO:1903506	Regulation of nucleic acid-templated transcription
	T459_13030	4072.A0A1U8GBW5	GO Process	GO:1903507	Negative regulation of nucleic acid-templated transcription
	T459_13030	4072.A0A1U8GBW5	GO Process	GO:2001141	Regulation of RNA biosynthetic process
	T459_13030	4072.A0A1U8GBW5	GO Function	GO:0003676	Nucleic acid binding
	T459_13030	4072.A0A1U8GBW5	GO Function	GO:0003677	DNA binding
	T459_13030	4072.A0A1U8GBW5	GO Function	GO:0003690	Double-stranded DNA binding
	T459_13030	4072.A0A1U8GBW5	GO Function	GO:0003712	Transcription coregulator activity
	T459_13030	4072.A0A1U8GBW5	GO Function	GO:0003714	Transcription corepressor activity
	T459_13030	4072.A0A1U8GBW5	GO Function	GO:0005488	Binding
	T459_13030	4072.A0A1U8GBW5	GO Function	GO:0097159	Organic cyclic compound binding
	T459_13030	4072.A0A1U8GBW5	GO Function	GO:0140110	Transcription regulator activity
	T459_13030	4072.A0A1U8GBW5	GO Function	GO:1901363	Heterocyclic compound binding
	T459_13030	4072.A0A1U8GBW5	GO Component	GO:0000118	Histone deacetylase complex
	T459_13030	4072.A0A1U8GBW5	GO Component	GO:0000151	Ubiquitin ligase complex
	T459_13030	4072.A0A1U8GBW5	GO Component	GO:0005622	Intracellular anatomical structure
	T459_13030	4072.A0A1U8GBW5	GO Component	GO:0005634	Nucleus
	T459_13030	4072.A0A1U8GBW5	GO Component	GO:0005654	Nucleoplasm
	T459_13030	4072.A0A1U8GBW5	GO Component	GO:0031461	cullin-RING ubiquitin ligase complex
	T459_13030	4072.A0A1U8GBW5	GO Component	GO:0031974	Membrane-enclosed lumen
	T459_13030	4072.A0A1U8GBW5	GO Component	GO:0031981	Nuclear lumen
	T459_13030	4072.A0A1U8GBW5	GO Component	GO:0032991	Protein-containing complex
	T459_13030	4072.A0A1U8GBW5	GO Component	GO:0043226	Organelle
	T459_13030	4072.A0A1U8GBW5	GO Component	GO:0043227	Membrane-bounded organelle
	T459_13030	4072.A0A1U8GBW5	GO Component	GO:0043229	Intracellular organelle
	T459_13030	4072.A0A1U8GBW5	GO Component	GO:0043231	Intracellular membrane-bounded organelle
	T459_13030	4072.A0A1U8GBW5	GO Component	GO:0043233	Organelle lumen
	T459_13030	4072.A0A1U8GBW5	GO Component	GO:0070013	Intracellular organelle lumen
	T459_13030	4072.A0A1U8GBW5	GO Component	GO:0080008	Cul4-RING E3 ubiquitin ligase complex
	T459_13030	4072.A0A1U8GBW5	GO Component	GO:0110165	Cellular anatomical entity
	T459_13030	4072.A0A1U8GBW5	GO Component	GO:0140513	Nuclear protein-containing complex
	T459_13030	4072.A0A1U8GBW5	GO Component	GO:0140535	Intracellular protein-containing complex
	T459_13030	4072.A0A1U8GBW5	GO Component	GO:1902494	Catalytic complex
	T459_13030	4072.A0A1U8GBW5	GO Component	GO:1990234	Transferase complex
	T459_13030	4072.A0A1U8GBW5	STRING clusters	CL:12908	Mixed, incl. Histone acetyltransferase complex, and Nuclear Receptor transcription pathway
	T459_13030	4072.A0A1U8GBW5	STRING clusters	CL:12911	Mixed, incl. F-box-like/WD repeat-containing protein Ebi-like, and Xyloglucan endo-transglycosylase (XET) C-terminus
	T459_13030	4072.A0A1U8GBW5	STRING clusters	CL:12916	Mixed, incl. F-box-like/WD repeat-containing protein Ebi-like, and Xyloglucan endo-transglycosylase (XET) C-terminus
	T459_13030	4072.A0A1U8GBW5	STRING clusters	CL:12921	Mixed, incl. F-box-like/WD repeat-containing protein Ebi-like, and Xyloglucan endo-transglycosylase (XET) C-terminus
	T459_13030	4072.A0A1U8GBW5	STRING clusters	CL:12926	Mixed, incl. F-box-like/WD repeat-containing protein Ebi-like, and Xyloglucan endo-transglycosylase (XET) C-terminus
	T459_13030	4072.A0A1U8GBW5	STRING clusters	CL:12931	Mixed, incl. F-box-like/WD repeat-containing protein Ebi-like, and Xyloglucan endo-transglycosylase (XET) C-terminus
	T459_13030	4072.A0A1U8GBW5	STRING clusters	CL:12936	Mixed, incl. F-box-like/WD repeat-containing protein Ebi-like, and SAGA-type complex
	T459_13030	4072.A0A1U8GBW5	STRING clusters	CL:12940	Mixed, incl. F-box-like/WD repeat-containing protein Ebi-like, and SAGA-type complex
	T459_13030	4072.A0A1U8GBW5	STRING clusters	CL:12941	Mixed, incl. F-box-like/WD repeat-containing protein Ebi-like, and SAGA-type complex
	T459_13030	4072.A0A1U8GBW5	Reactome	MAP-1430728	Metabolism
	T459_13030	4072.A0A1U8GBW5	Reactome	MAP-162582	Signal Transduction
	T459_13030	4072.A0A1U8GBW5	Reactome	MAP-212436	Generic Transcription Pathway
	T459_13030	4072.A0A1U8GBW5	Reactome	MAP-2262752	Cellular responses to stress
	T459_13030	4072.A0A1U8GBW5	Reactome	MAP-556833	Metabolism of lipids
	T459_13030	4072.A0A1U8GBW5	Reactome	MAP-73857	RNA Polymerase II Transcription
	T459_13030	4072.A0A1U8GBW5	Reactome	MAP-74160	Gene expression (Transcription)
	T459_13030	4072.A0A1U8GBW5	Reactome	MAP-8953897	Cellular responses to stimuli
	T459_13030	4072.A0A1U8GBW5	Reactome	MAP-9006931	Signaling by Nuclear Receptors
	T459_13030	4072.A0A1U8GBW5	Reactome	MAP-9707564	Cytoprotection by HMOX1
	T459_13030	4072.A0A1U8GBW5	Reactome	MAP-9711123	Cellular response to chemical stress
	T459_13030	4072.A0A1U8GBW5	COMPARTMENTS	GOCC:0000118	Histone deacetylase complex
	T459_13030	4072.A0A1U8GBW5	COMPARTMENTS	GOCC:0000151	Ubiquitin ligase complex
	T459_13030	4072.A0A1U8GBW5	COMPARTMENTS	GOCC:0005622	Intracellular
	T459_13030	4072.A0A1U8GBW5	COMPARTMENTS	GOCC:0005634	Nucleus
	T459_13030	4072.A0A1U8GBW5	COMPARTMENTS	GOCC:0005654	Nucleoplasm
	T459_13030	4072.A0A1U8GBW5	COMPARTMENTS	GOCC:0031461	cullin-RING ubiquitin ligase complex
	T459_13030	4072.A0A1U8GBW5	COMPARTMENTS	GOCC:0031974	Membrane-enclosed lumen
	T459_13030	4072.A0A1U8GBW5	COMPARTMENTS	GOCC:0031981	Nuclear lumen
	T459_13030	4072.A0A1U8GBW5	COMPARTMENTS	GOCC:0032991	Protein-containing complex
	T459_13030	4072.A0A1U8GBW5	COMPARTMENTS	GOCC:0043226	Organelle
	T459_13030	4072.A0A1U8GBW5	COMPARTMENTS	GOCC:0043227	Membrane-bounded organelle
	T459_13030	4072.A0A1U8GBW5	COMPARTMENTS	GOCC:0043229	Intracellular organelle
	T459_13030	4072.A0A1U8GBW5	COMPARTMENTS	GOCC:0043231	Intracellular membrane-bounded organelle
	T459_13030	4072.A0A1U8GBW5	COMPARTMENTS	GOCC:0043233	Organelle lumen
	T459_13030	4072.A0A1U8GBW5	COMPARTMENTS	GOCC:0070013	Intracellular organelle lumen
	T459_13030	4072.A0A1U8GBW5	COMPARTMENTS	GOCC:0080008	Cul4-RING E3 ubiquitin ligase complex
	T459_13030	4072.A0A1U8GBW5	COMPARTMENTS	GOCC:0110165	Cellular anatomical entity
	T459_13030	4072.A0A1U8GBW5	COMPARTMENTS	GOCC:1902494	Catalytic complex
	T459_13030	4072.A0A1U8GBW5	COMPARTMENTS	GOCC:1990234	Transferase complex
	T459_13030	4072.A0A1U8GBW5	UniProt Keywords	KW-0677	Repeat
	T459_13030	4072.A0A1U8GBW5	UniProt Keywords	KW-0853	WD repeat
	T459_13030	4072.A0A1U8GBW5	InterPro	IPR001680	WD40 repeat
	T459_13030	4072.A0A1U8GBW5	InterPro	IPR006594	LIS1 homology motif
	T459_13030	4072.A0A1U8GBW5	InterPro	IPR015943	WD40/YVTN repeat-like-containing domain superfamily
	T459_13030	4072.A0A1U8GBW5	InterPro	IPR019775	WD40 repeat, conserved site
	T459_13030	4072.A0A1U8GBW5	InterPro	IPR020472	G-protein beta WD-40 repeat
	T459_13030	4072.A0A1U8GBW5	InterPro	IPR036322	WD40-repeat-containing domain superfamily
	T459_13030	4072.A0A1U8GBW5	InterPro	IPR045183	F-box-like/WD repeat-containing protein Ebi-like
	T459_13030	4072.A0A1U8GBW5	SMART	SM00320	WD40 repeats
	T459_13030	4072.A0A1U8GBW5	SMART	SM00667	Lissencephaly type-1-like homology motif
	T459_13138	4072.A0A1U8GKT6	GO Process	GO:0003333	Amino acid transmembrane transport
	T459_13138	4072.A0A1U8GKT6	GO Process	GO:0006810	Transport
	T459_13138	4072.A0A1U8GKT6	GO Process	GO:0006865	Amino acid transport
	T459_13138	4072.A0A1U8GKT6	GO Process	GO:0009987	Cellular process
	T459_13138	4072.A0A1U8GKT6	GO Process	GO:0015849	Organic acid transport
	T459_13138	4072.A0A1U8GKT6	GO Process	GO:0051179	Localization
	T459_13138	4072.A0A1U8GKT6	GO Process	GO:0051234	Establishment of localization
	T459_13138	4072.A0A1U8GKT6	GO Process	GO:0055085	Transmembrane transport
	T459_13138	4072.A0A1U8GKT6	GO Process	GO:0071702	Organic substance transport
	T459_13138	4072.A0A1U8GKT6	GO Process	GO:0071705	Nitrogen compound transport
	T459_13138	4072.A0A1U8GKT6	GO Process	GO:1903825	Organic acid transmembrane transport
	T459_13138	4072.A0A1U8GKT6	GO Process	GO:1905039	Carboxylic acid transmembrane transport
	T459_13138	4072.A0A1U8GKT6	GO Function	GO:0005215	Transporter activity
	T459_13138	4072.A0A1U8GKT6	GO Function	GO:0005342	Organic acid transmembrane transporter activity
	T459_13138	4072.A0A1U8GKT6	GO Function	GO:0015171	Amino acid transmembrane transporter activity
	T459_13138	4072.A0A1U8GKT6	GO Function	GO:0022857	Transmembrane transporter activity
	T459_13138	4072.A0A1U8GKT6	GO Function	GO:0046943	Carboxylic acid transmembrane transporter activity
	T459_13138	4072.A0A1U8GKT6	GO Component	GO:0005886	Plasma membrane
	T459_13138	4072.A0A1U8GKT6	GO Component	GO:0016020	Membrane
	T459_13138	4072.A0A1U8GKT6	GO Component	GO:0016021	Integral component of membrane
	T459_13138	4072.A0A1U8GKT6	GO Component	GO:0031224	Intrinsic component of membrane
	T459_13138	4072.A0A1U8GKT6	GO Component	GO:0071944	Cell periphery
	T459_13138	4072.A0A1U8GKT6	GO Component	GO:0110165	Cellular anatomical entity
	T459_13138	4072.A0A1U8GKT6	STRING clusters	CL:57139	Mixed, incl. Lipase (class 3), and Arsenite methyltransferase-like
	T459_13138	4072.A0A1U8GKT6	STRING clusters	CL:57140	Mixed, incl. Lipase (class 3), and Auxin transmembrane transporter activity
	T459_13138	4072.A0A1U8GKT6	STRING clusters	CL:57141	Mixed, incl. Auxin transmembrane transporter activity, and Nucleobase cation symporter 2 family
	T459_13138	4072.A0A1U8GKT6	STRING clusters	CL:57205	Mixed, incl. Glycosyl transferase family 2, and F-box protein SNE/GID2
	T459_13138	4072.A0A1U8GKT6	STRING clusters	CL:57206	Mixed, incl. Glycosyl transferase family 2, and tRNA-dihydrouridine synthase
	T459_13138	4072.A0A1U8GKT6	STRING clusters	CL:57209	Glycosyl transferase family 2, and Amino acid transporter, transmembrane domain
	T459_13138	4072.A0A1U8GKT6	UniProt Keywords	KW-0472	Membrane
	T459_13138	4072.A0A1U8GKT6	UniProt Keywords	KW-0812	Transmembrane
	T459_13138	4072.A0A1U8GKT6	UniProt Keywords	KW-1133	Transmembrane helix
	T459_13138	4072.A0A1U8GKT6	Pfam	PF01490	Transmembrane amino acid transporter protein
	T459_13138	4072.A0A1U8GKT6	InterPro	IPR013057	Amino acid transporter, transmembrane domain
	T459_13446	4072.A0A2G2ZSS3	GO Process	GO:0006457	Protein folding
	T459_13446	4072.A0A2G2ZSS3	GO Process	GO:0006605	Protein targeting
	T459_13446	4072.A0A2G2ZSS3	GO Process	GO:0006626	Protein targeting to mitochondrion
	T459_13446	4072.A0A2G2ZSS3	GO Process	GO:0006810	Transport
	T459_13446	4072.A0A2G2ZSS3	GO Process	GO:0006839	Mitochondrial transport
	T459_13446	4072.A0A2G2ZSS3	GO Process	GO:0006886	Intracellular protein transport
	T459_13446	4072.A0A2G2ZSS3	GO Process	GO:0006996	Organelle organization
	T459_13446	4072.A0A2G2ZSS3	GO Process	GO:0007005	Mitochondrion organization
	T459_13446	4072.A0A2G2ZSS3	GO Process	GO:0008104	Protein localization
	T459_13446	4072.A0A2G2ZSS3	GO Process	GO:0009987	Cellular process
	T459_13446	4072.A0A2G2ZSS3	GO Process	GO:0015031	Protein transport
	T459_13446	4072.A0A2G2ZSS3	GO Process	GO:0016043	Cellular component organization
	T459_13446	4072.A0A2G2ZSS3	GO Process	GO:0030150	Protein import into mitochondrial matrix
	T459_13446	4072.A0A2G2ZSS3	GO Process	GO:0031647	Regulation of protein stability
	T459_13446	4072.A0A2G2ZSS3	GO Process	GO:0033036	Macromolecule localization
	T459_13446	4072.A0A2G2ZSS3	GO Process	GO:0033365	Protein localization to organelle
	T459_13446	4072.A0A2G2ZSS3	GO Process	GO:0044743	Protein transmembrane import into intracellular organelle
	T459_13446	4072.A0A2G2ZSS3	GO Process	GO:0045184	Establishment of protein localization
	T459_13446	4072.A0A2G2ZSS3	GO Process	GO:0046907	Intracellular transport
	T459_13446	4072.A0A2G2ZSS3	GO Process	GO:0050821	Protein stabilization
	T459_13446	4072.A0A2G2ZSS3	GO Process	GO:0051179	Localization
	T459_13446	4072.A0A2G2ZSS3	GO Process	GO:0051234	Establishment of localization
	T459_13446	4072.A0A2G2ZSS3	GO Process	GO:0051641	Cellular localization
	T459_13446	4072.A0A2G2ZSS3	GO Process	GO:0051649	Establishment of localization in cell
	T459_13446	4072.A0A2G2ZSS3	GO Process	GO:0055085	Transmembrane transport
	T459_13446	4072.A0A2G2ZSS3	GO Process	GO:0065002	Intracellular protein transmembrane transport
	T459_13446	4072.A0A2G2ZSS3	GO Process	GO:0065007	Biological regulation
	T459_13446	4072.A0A2G2ZSS3	GO Process	GO:0065008	Regulation of biological quality
	T459_13446	4072.A0A2G2ZSS3	GO Process	GO:0070585	Protein localization to mitochondrion
	T459_13446	4072.A0A2G2ZSS3	GO Process	GO:0070727	Cellular macromolecule localization
	T459_13446	4072.A0A2G2ZSS3	GO Process	GO:0071702	Organic substance transport
	T459_13446	4072.A0A2G2ZSS3	GO Process	GO:0071705	Nitrogen compound transport
	T459_13446	4072.A0A2G2ZSS3	GO Process	GO:0071806	Protein transmembrane transport
	T459_13446	4072.A0A2G2ZSS3	GO Process	GO:0071840	Cellular component organization or biogenesis
	T459_13446	4072.A0A2G2ZSS3	GO Process	GO:0072594	Establishment of protein localization to organelle
	T459_13446	4072.A0A2G2ZSS3	GO Process	GO:0072655	Establishment of protein localization to mitochondrion
	T459_13446	4072.A0A2G2ZSS3	GO Process	GO:1990542	Mitochondrial transmembrane transport
	T459_13446	4072.A0A2G2ZSS3	GO Function	GO:0005488	Binding
	T459_13446	4072.A0A2G2ZSS3	GO Function	GO:0005515	Protein binding
	T459_13446	4072.A0A2G2ZSS3	GO Function	GO:0008270	Zinc ion binding
	T459_13446	4072.A0A2G2ZSS3	GO Function	GO:0043167	Ion binding
	T459_13446	4072.A0A2G2ZSS3	GO Function	GO:0043169	Cation binding
	T459_13446	4072.A0A2G2ZSS3	GO Function	GO:0046872	Metal ion binding
	T459_13446	4072.A0A2G2ZSS3	GO Function	GO:0046914	Transition metal ion binding
	T459_13446	4072.A0A2G2ZSS3	GO Function	GO:0051087	Chaperone binding
	T459_13446	4072.A0A2G2ZSS3	GO Component	GO:0005622	Intracellular anatomical structure
	T459_13446	4072.A0A2G2ZSS3	GO Component	GO:0005737	Cytoplasm
	T459_13446	4072.A0A2G2ZSS3	GO Component	GO:0005739	Mitochondrion
	T459_13446	4072.A0A2G2ZSS3	GO Component	GO:0043226	Organelle
	T459_13446	4072.A0A2G2ZSS3	GO Component	GO:0043227	Membrane-bounded organelle
	T459_13446	4072.A0A2G2ZSS3	GO Component	GO:0043229	Intracellular organelle
	T459_13446	4072.A0A2G2ZSS3	GO Component	GO:0043231	Intracellular membrane-bounded organelle
	T459_13446	4072.A0A2G2ZSS3	GO Component	GO:0110165	Cellular anatomical entity
	T459_13446	4072.A0A2G2ZSS3	STRING clusters	CL:6657	Mixed, incl. Mitochondrial calcium ion transport, and Protein targeting to mitochondrion
	T459_13446	4072.A0A2G2ZSS3	STRING clusters	CL:6659	Mixed, incl. Mitochondrial calcium ion transport, and Protein targeting to mitochondrion
	T459_13446	4072.A0A2G2ZSS3	STRING clusters	CL:6663	Protein targeting to mitochondrion, and Porin, eukaryotic type
	T459_13446	4072.A0A2G2ZSS3	STRING clusters	CL:6664	Protein targeting to mitochondrion, and Porin, eukaryotic type
	T459_13446	4072.A0A2G2ZSS3	COMPARTMENTS	GOCC:0005622	Intracellular
	T459_13446	4072.A0A2G2ZSS3	COMPARTMENTS	GOCC:0005737	Cytoplasm
	T459_13446	4072.A0A2G2ZSS3	COMPARTMENTS	GOCC:0005739	Mitochondrion
	T459_13446	4072.A0A2G2ZSS3	COMPARTMENTS	GOCC:0043226	Organelle
	T459_13446	4072.A0A2G2ZSS3	COMPARTMENTS	GOCC:0043227	Membrane-bounded organelle
	T459_13446	4072.A0A2G2ZSS3	COMPARTMENTS	GOCC:0043229	Intracellular organelle
	T459_13446	4072.A0A2G2ZSS3	COMPARTMENTS	GOCC:0043231	Intracellular membrane-bounded organelle
	T459_13446	4072.A0A2G2ZSS3	COMPARTMENTS	GOCC:0110165	Cellular anatomical entity
	T459_13446	4072.A0A2G2ZSS3	UniProt Keywords	KW-0479	Metal-binding
	T459_13446	4072.A0A2G2ZSS3	UniProt Keywords	KW-0862	Zinc
	T459_13446	4072.A0A2G2ZSS3	UniProt Keywords	KW-0863	Zinc-finger
	T459_13446	4072.A0A2G2ZSS3	Pfam	PF05180	DNL zinc finger
	T459_13446	4072.A0A2G2ZSS3	InterPro	IPR007853	Zinc finger, DNL-type
	T459_13446	4072.A0A2G2ZSS3	InterPro	IPR024158	Mitochondrial import protein TIM15
	T459_13527	4072.A0A1U8GA34	GO Process	GO:0006139	Nucleobase-containing compound metabolic process
	T459_13527	4072.A0A1U8GA34	GO Process	GO:0006725	Cellular aromatic compound metabolic process
	T459_13527	4072.A0A1U8GA34	GO Process	GO:0006807	Nitrogen compound metabolic process
	T459_13527	4072.A0A1U8GA34	GO Process	GO:0008152	Metabolic process
	T459_13527	4072.A0A1U8GA34	GO Process	GO:0009451	RNA modification
	T459_13527	4072.A0A1U8GA34	GO Process	GO:0009987	Cellular process
	T459_13527	4072.A0A1U8GA34	GO Process	GO:0016070	RNA metabolic process
	T459_13527	4072.A0A1U8GA34	GO Process	GO:0034641	Cellular nitrogen compound metabolic process
	T459_13527	4072.A0A1U8GA34	GO Process	GO:0043170	Macromolecule metabolic process
	T459_13527	4072.A0A1U8GA34	GO Process	GO:0043412	Macromolecule modification
	T459_13527	4072.A0A1U8GA34	GO Process	GO:0044237	Cellular metabolic process
	T459_13527	4072.A0A1U8GA34	GO Process	GO:0044238	Primary metabolic process
	T459_13527	4072.A0A1U8GA34	GO Process	GO:0046483	Heterocycle metabolic process
	T459_13527	4072.A0A1U8GA34	GO Process	GO:0071704	Organic substance metabolic process
	T459_13527	4072.A0A1U8GA34	GO Process	GO:0090304	Nucleic acid metabolic process
	T459_13527	4072.A0A1U8GA34	GO Process	GO:1901360	Organic cyclic compound metabolic process
	T459_13527	4072.A0A1U8GA34	GO Function	GO:0003676	Nucleic acid binding
	T459_13527	4072.A0A1U8GA34	GO Function	GO:0003723	RNA binding
	T459_13527	4072.A0A1U8GA34	GO Function	GO:0005488	Binding
	T459_13527	4072.A0A1U8GA34	GO Function	GO:0008270	Zinc ion binding
	T459_13527	4072.A0A1U8GA34	GO Function	GO:0043167	Ion binding
	T459_13527	4072.A0A1U8GA34	GO Function	GO:0043169	Cation binding
	T459_13527	4072.A0A1U8GA34	GO Function	GO:0046872	Metal ion binding
	T459_13527	4072.A0A1U8GA34	GO Function	GO:0046914	Transition metal ion binding
	T459_13527	4072.A0A1U8GA34	GO Function	GO:0097159	Organic cyclic compound binding
	T459_13527	4072.A0A1U8GA34	GO Function	GO:1901363	Heterocyclic compound binding
	T459_13527	4072.A0A1U8GA34	GO Component	GO:0005622	Intracellular anatomical structure
	T459_13527	4072.A0A1U8GA34	GO Component	GO:0043226	Organelle
	T459_13527	4072.A0A1U8GA34	GO Component	GO:0043227	Membrane-bounded organelle
	T459_13527	4072.A0A1U8GA34	GO Component	GO:0043229	Intracellular organelle
	T459_13527	4072.A0A1U8GA34	GO Component	GO:0043231	Intracellular membrane-bounded organelle
	T459_13527	4072.A0A1U8GA34	GO Component	GO:0110165	Cellular anatomical entity
	T459_13527	4072.A0A1U8GA34	STRING clusters	CL:58874	Pentatricopeptide repeat domain, and Gamma-tubulin complex
	T459_13527	4072.A0A1U8GA34	STRING clusters	CL:58875	Pentatricopeptide repeat domain, and Gamma-tubulin complex
	T459_13527	4072.A0A1U8GA34	STRING clusters	CL:59135	Mixed, incl. E+ motif, and Pentatricopeptide repeat-containing protein BIR6-like
	T459_13527	4072.A0A1U8GA34	COMPARTMENTS	GOCC:0005622	Intracellular
	T459_13527	4072.A0A1U8GA34	COMPARTMENTS	GOCC:0043226	Organelle
	T459_13527	4072.A0A1U8GA34	COMPARTMENTS	GOCC:0043229	Intracellular organelle
	T459_13527	4072.A0A1U8GA34	COMPARTMENTS	GOCC:0110165	Cellular anatomical entity
	T459_13527	4072.A0A1U8GA34	UniProt Keywords	KW-0677	Repeat
	T459_13527	4072.A0A1U8GA34	Pfam	PF01535	PPR repeat
	T459_13527	4072.A0A1U8GA34	Pfam	PF13041	PPR repeat family
	T459_13527	4072.A0A1U8GA34	Pfam	PF13812	Pentatricopeptide repeat domain
	T459_13527	4072.A0A1U8GA34	Pfam	PF14432	DYW family of nucleic acid deaminases
	T459_13527	4072.A0A1U8GA34	InterPro	IPR002885	Pentatricopeptide repeat
	T459_13527	4072.A0A1U8GA34	InterPro	IPR011990	Tetratricopeptide-like helical domain superfamily
	T459_13527	4072.A0A1U8GA34	InterPro	IPR032867	DYW domain
	T459_13527	4072.A0A1U8GA34	InterPro	IPR046848	E motif
	T459_13527	4072.A0A1U8GA34	InterPro	IPR046960	Pentatricopeptide repeat-containing protein At4g14850-like, plant
	T459_15621	4072.A0A2G2ZKU5	GO Process	GO:0000003	Reproduction
	T459_15621	4072.A0A2G2ZKU5	GO Process	GO:0001510	RNA methylation
	T459_15621	4072.A0A2G2ZKU5	GO Process	GO:0003006	Developmental process involved in reproduction
	T459_15621	4072.A0A2G2ZKU5	GO Process	GO:0006139	Nucleobase-containing compound metabolic process
	T459_15621	4072.A0A2G2ZKU5	GO Process	GO:0006725	Cellular aromatic compound metabolic process
	T459_15621	4072.A0A2G2ZKU5	GO Process	GO:0006807	Nitrogen compound metabolic process
	T459_15621	4072.A0A2G2ZKU5	GO Process	GO:0007275	Multicellular organism development
	T459_15621	4072.A0A2G2ZKU5	GO Process	GO:0008152	Metabolic process
	T459_15621	4072.A0A2G2ZKU5	GO Process	GO:0009451	RNA modification
	T459_15621	4072.A0A2G2ZKU5	GO Process	GO:0009790	Embryo development
	T459_15621	4072.A0A2G2ZKU5	GO Process	GO:0009791	Post-embryonic development
	T459_15621	4072.A0A2G2ZKU5	GO Process	GO:0009793	Embryo development ending in seed dormancy
	T459_15621	4072.A0A2G2ZKU5	GO Process	GO:0009987	Cellular process
	T459_15621	4072.A0A2G2ZKU5	GO Process	GO:0010154	Fruit development
	T459_15621	4072.A0A2G2ZKU5	GO Process	GO:0016070	RNA metabolic process
	T459_15621	4072.A0A2G2ZKU5	GO Process	GO:0016071	mRNA metabolic process
	T459_15621	4072.A0A2G2ZKU5	GO Process	GO:0016556	mRNA modification
	T459_15621	4072.A0A2G2ZKU5	GO Process	GO:0022414	Reproductive process
	T459_15621	4072.A0A2G2ZKU5	GO Process	GO:0032259	Methylation
	T459_15621	4072.A0A2G2ZKU5	GO Process	GO:0032501	Multicellular organismal process
	T459_15621	4072.A0A2G2ZKU5	GO Process	GO:0032502	Developmental process
	T459_15621	4072.A0A2G2ZKU5	GO Process	GO:0034641	Cellular nitrogen compound metabolic process
	T459_15621	4072.A0A2G2ZKU5	GO Process	GO:0043170	Macromolecule metabolic process
	T459_15621	4072.A0A2G2ZKU5	GO Process	GO:0043412	Macromolecule modification
	T459_15621	4072.A0A2G2ZKU5	GO Process	GO:0043414	Macromolecule methylation
	T459_15621	4072.A0A2G2ZKU5	GO Process	GO:0044237	Cellular metabolic process
	T459_15621	4072.A0A2G2ZKU5	GO Process	GO:0044238	Primary metabolic process
	T459_15621	4072.A0A2G2ZKU5	GO Process	GO:0044260	Cellular macromolecule metabolic process
	T459_15621	4072.A0A2G2ZKU5	GO Process	GO:0046483	Heterocycle metabolic process
	T459_15621	4072.A0A2G2ZKU5	GO Process	GO:0048316	Seed development
	T459_15621	4072.A0A2G2ZKU5	GO Process	GO:0048608	Reproductive structure development
	T459_15621	4072.A0A2G2ZKU5	GO Process	GO:0048731	System development
	T459_15621	4072.A0A2G2ZKU5	GO Process	GO:0048856	Anatomical structure development
	T459_15621	4072.A0A2G2ZKU5	GO Process	GO:0061458	Reproductive system development
	T459_15621	4072.A0A2G2ZKU5	GO Process	GO:0071704	Organic substance metabolic process
	T459_15621	4072.A0A2G2ZKU5	GO Process	GO:0080009	mRNA methylation
	T459_15621	4072.A0A2G2ZKU5	GO Process	GO:0090304	Nucleic acid metabolic process
	T459_15621	4072.A0A2G2ZKU5	GO Process	GO:1901360	Organic cyclic compound metabolic process
	T459_15621	4072.A0A2G2ZKU5	GO Function	GO:0003676	Nucleic acid binding
	T459_15621	4072.A0A2G2ZKU5	GO Function	GO:0003723	RNA binding
	T459_15621	4072.A0A2G2ZKU5	GO Function	GO:0003729	mRNA binding
	T459_15621	4072.A0A2G2ZKU5	GO Function	GO:0003824	Catalytic activity
	T459_15621	4072.A0A2G2ZKU5	GO Function	GO:0005488	Binding
	T459_15621	4072.A0A2G2ZKU5	GO Function	GO:0008168	Methyltransferase activity
	T459_15621	4072.A0A2G2ZKU5	GO Function	GO:0016740	Transferase activity
	T459_15621	4072.A0A2G2ZKU5	GO Function	GO:0016741	Transferase activity, transferring one-carbon groups
	T459_15621	4072.A0A2G2ZKU5	GO Function	GO:0097159	Organic cyclic compound binding
	T459_15621	4072.A0A2G2ZKU5	GO Function	GO:1901363	Heterocyclic compound binding
	T459_15621	4072.A0A2G2ZKU5	GO Component	GO:0005622	Intracellular anatomical structure
	T459_15621	4072.A0A2G2ZKU5	GO Component	GO:0005634	Nucleus
	T459_15621	4072.A0A2G2ZKU5	GO Component	GO:0005654	Nucleoplasm
	T459_15621	4072.A0A2G2ZKU5	GO Component	GO:0016604	Nuclear body
	T459_15621	4072.A0A2G2ZKU5	GO Component	GO:0016607	Nuclear speck
	T459_15621	4072.A0A2G2ZKU5	GO Component	GO:0031974	Membrane-enclosed lumen
	T459_15621	4072.A0A2G2ZKU5	GO Component	GO:0031981	Nuclear lumen
	T459_15621	4072.A0A2G2ZKU5	GO Component	GO:0032991	Protein-containing complex
	T459_15621	4072.A0A2G2ZKU5	GO Component	GO:0034708	Methyltransferase complex
	T459_15621	4072.A0A2G2ZKU5	GO Component	GO:0036396	RNA N6-methyladenosine methyltransferase complex
	T459_15621	4072.A0A2G2ZKU5	GO Component	GO:0043226	Organelle
	T459_15621	4072.A0A2G2ZKU5	GO Component	GO:0043227	Membrane-bounded organelle
	T459_15621	4072.A0A2G2ZKU5	GO Component	GO:0043229	Intracellular organelle
	T459_15621	4072.A0A2G2ZKU5	GO Component	GO:0043231	Intracellular membrane-bounded organelle
	T459_15621	4072.A0A2G2ZKU5	GO Component	GO:0043233	Organelle lumen
	T459_15621	4072.A0A2G2ZKU5	GO Component	GO:0045293	mRNA editing complex
	T459_15621	4072.A0A2G2ZKU5	GO Component	GO:0070013	Intracellular organelle lumen
	T459_15621	4072.A0A2G2ZKU5	GO Component	GO:0110165	Cellular anatomical entity
	T459_15621	4072.A0A2G2ZKU5	GO Component	GO:1902494	Catalytic complex
	T459_15621	4072.A0A2G2ZKU5	GO Component	GO:1990234	Transferase complex
	T459_15621	4072.A0A2G2ZKU5	STRING clusters	CL:54707	Mixed, incl. Amino acid/polyamine transporter I, and ABC-2 type transporter
	T459_15621	4072.A0A2G2ZKU5	STRING clusters	CL:54845	Mixed, incl. Amino acid permease, and mRNA methylation
	T459_15621	4072.A0A2G2ZKU5	STRING clusters	CL:54846	Mixed, incl. mRNA methylation, and Alpha-ketoglutarate-dependent dioxygenase AlkB-like superfamily
	T459_15621	4072.A0A2G2ZKU5	STRING clusters	CL:54848	Mixed, incl. mRNA methylation, and YTH domain
	T459_15621	4072.A0A2G2ZKU5	STRING clusters	CL:54850	mRNA methylation, and YTH domain
	T459_15621	4072.A0A2G2ZKU5	STRING clusters	CL:54855	mRNA editing complex, and YTH domain
	T459_15621	4072.A0A2G2ZKU5	Reactome	MAP-72203	Processing of Capped Intron-Containing Pre-mRNA
	T459_15621	4072.A0A2G2ZKU5	Reactome	MAP-8953854	Metabolism of RNA
	T459_15621	4072.A0A2G2ZKU5	COMPARTMENTS	GOCC:0005622	Intracellular
	T459_15621	4072.A0A2G2ZKU5	COMPARTMENTS	GOCC:0032991	Protein-containing complex
	T459_15621	4072.A0A2G2ZKU5	COMPARTMENTS	GOCC:0034708	Methyltransferase complex
	T459_15621	4072.A0A2G2ZKU5	COMPARTMENTS	GOCC:0036396	RNA N6-methyladenosine methyltransferase complex
	T459_15621	4072.A0A2G2ZKU5	COMPARTMENTS	GOCC:0045293	mRNA editing complex
	T459_15621	4072.A0A2G2ZKU5	COMPARTMENTS	GOCC:1902494	Catalytic complex
	T459_15621	4072.A0A2G2ZKU5	COMPARTMENTS	GOCC:1990234	Transferase complex
	T459_15621	4072.A0A2G2ZKU5	UniProt Keywords	KW-0489	Methyltransferase
	T459_15621	4072.A0A2G2ZKU5	UniProt Keywords	KW-0808	Transferase
	T459_15621	4072.A0A2G2ZKU5	Pfam	PF05063	MT-A70
	T459_15621	4072.A0A2G2ZKU5	InterPro	IPR002052	DNA methylase, N-6 adenine-specific, conserved site
	T459_15621	4072.A0A2G2ZKU5	InterPro	IPR007757	MT-A70-like
	T459_15621	4072.A0A2G2ZKU5	InterPro	IPR029063	S-adenosyl-L-methionine-dependent methyltransferase superfamily
	T459_15621	4072.A0A2G2ZKU5	InterPro	IPR045123	N6-adenosine-methyltransferase non-catalytic subunit METTL14-like
	T459_15796	4072.A0A2G2Z708	GO Process	GO:0006355	Regulation of transcription, DNA-templated
	T459_15796	4072.A0A2G2Z708	GO Process	GO:0009889	Regulation of biosynthetic process
	T459_15796	4072.A0A2G2Z708	GO Process	GO:0010468	Regulation of gene expression
	T459_15796	4072.A0A2G2Z708	GO Process	GO:0010556	Regulation of macromolecule biosynthetic process
	T459_15796	4072.A0A2G2Z708	GO Process	GO:0019219	Regulation of nucleobase-containing compound metabolic process
	T459_15796	4072.A0A2G2Z708	GO Process	GO:0019222	Regulation of metabolic process
	T459_15796	4072.A0A2G2Z708	GO Process	GO:0031323	Regulation of cellular metabolic process
	T459_15796	4072.A0A2G2Z708	GO Process	GO:0031326	Regulation of cellular biosynthetic process
	T459_15796	4072.A0A2G2Z708	GO Process	GO:0050789	Regulation of biological process
	T459_15796	4072.A0A2G2Z708	GO Process	GO:0050794	Regulation of cellular process
	T459_15796	4072.A0A2G2Z708	GO Process	GO:0051171	Regulation of nitrogen compound metabolic process
	T459_15796	4072.A0A2G2Z708	GO Process	GO:0051252	Regulation of RNA metabolic process
	T459_15796	4072.A0A2G2Z708	GO Process	GO:0060255	Regulation of macromolecule metabolic process
	T459_15796	4072.A0A2G2Z708	GO Process	GO:0065007	Biological regulation
	T459_15796	4072.A0A2G2Z708	GO Process	GO:0080090	Regulation of primary metabolic process
	T459_15796	4072.A0A2G2Z708	GO Process	GO:1903506	Regulation of nucleic acid-templated transcription
	T459_15796	4072.A0A2G2Z708	GO Process	GO:2001141	Regulation of RNA biosynthetic process
	T459_15796	4072.A0A2G2Z708	GO Function	GO:0003676	Nucleic acid binding
	T459_15796	4072.A0A2G2Z708	GO Function	GO:0003677	DNA binding
	T459_15796	4072.A0A2G2Z708	GO Function	GO:0003700	DNA-binding transcription factor activity
	T459_15796	4072.A0A2G2Z708	GO Function	GO:0005488	Binding
	T459_15796	4072.A0A2G2Z708	GO Function	GO:0097159	Organic cyclic compound binding
	T459_15796	4072.A0A2G2Z708	GO Function	GO:0140110	Transcription regulator activity
	T459_15796	4072.A0A2G2Z708	GO Function	GO:1901363	Heterocyclic compound binding
	T459_15796	4072.A0A2G2Z708	GO Component	GO:0005622	Intracellular anatomical structure
	T459_15796	4072.A0A2G2Z708	GO Component	GO:0005634	Nucleus
	T459_15796	4072.A0A2G2Z708	GO Component	GO:0043226	Organelle
	T459_15796	4072.A0A2G2Z708	GO Component	GO:0043227	Membrane-bounded organelle
	T459_15796	4072.A0A2G2Z708	GO Component	GO:0043229	Intracellular organelle
	T459_15796	4072.A0A2G2Z708	GO Component	GO:0043231	Intracellular membrane-bounded organelle
	T459_15796	4072.A0A2G2Z708	GO Component	GO:0110165	Cellular anatomical entity
	T459_15796	4072.A0A2G2Z708	STRING clusters	CL:9879	Class I peroxisomal membrane protein import, and Mpv17/PMP22
	T459_15796	4072.A0A2G2Z708	STRING clusters	CL:9991	Mixed, incl. FHA domain, and Acyl CoA binding protein
	T459_15796	4072.A0A2G2Z708	COMPARTMENTS	GOCC:0005622	Intracellular
	T459_15796	4072.A0A2G2Z708	COMPARTMENTS	GOCC:0005634	Nucleus
	T459_15796	4072.A0A2G2Z708	COMPARTMENTS	GOCC:0043226	Organelle
	T459_15796	4072.A0A2G2Z708	COMPARTMENTS	GOCC:0043227	Membrane-bounded organelle
	T459_15796	4072.A0A2G2Z708	COMPARTMENTS	GOCC:0043229	Intracellular organelle
	T459_15796	4072.A0A2G2Z708	COMPARTMENTS	GOCC:0043231	Intracellular membrane-bounded organelle
	T459_15796	4072.A0A2G2Z708	COMPARTMENTS	GOCC:0110165	Cellular anatomical entity
	T459_15796	4072.A0A2G2Z708	UniProt Keywords	KW-0175	Coiled coil
	T459_15796	4072.A0A2G2Z708	UniProt Keywords	KW-0539	Nucleus
	T459_15796	4072.A0A2G2Z708	UniProt Keywords	KW-0804	Transcription
	T459_15796	4072.A0A2G2Z708	UniProt Keywords	KW-0805	Transcription regulation
	T459_15796	4072.A0A2G2Z708	Pfam	PF00249	Myb-like DNA-binding domain
	T459_15796	4072.A0A2G2Z708	Pfam	PF14379	MYB-CC type transfactor, LHEQLE motif
	T459_15796	4072.A0A2G2Z708	InterPro	IPR001005	SANT/Myb domain
	T459_15796	4072.A0A2G2Z708	InterPro	IPR006447	Myb domain, plants
	T459_15796	4072.A0A2G2Z708	InterPro	IPR009057	Homeobox-like domain superfamily
	T459_15796	4072.A0A2G2Z708	InterPro	IPR017930	Myb domain
	T459_15796	4072.A0A2G2Z708	InterPro	IPR025756	MYB-CC type transcription factor, LHEQLE-containing domain
	T459_15796	4072.A0A2G2Z708	InterPro	IPR044848	PHR1-like
	T459_15981	4072.A0A2G2Z7H7	GO Component	GO:0005622	Intracellular anatomical structure
	T459_15981	4072.A0A2G2Z7H7	GO Component	GO:0005737	Cytoplasm
	T459_15981	4072.A0A2G2Z7H7	GO Component	GO:0005829	Cytosol
	T459_15981	4072.A0A2G2Z7H7	GO Component	GO:0110165	Cellular anatomical entity
	T459_15981	4072.A0A2G2Z7H7	STRING clusters	CL:42213	Mostly uncharacterized, incl. Response to L-glutamate, and Regulation of TOR signaling
	T459_15981	4072.A0A2G2Z7H7	InterPro	IPR029068	Glyoxalase/Bleomycin resistance protein/Dihydroxybiphenyl dioxygenase
	T459_15981	4072.A0A2G2Z7H7	InterPro	IPR037523	Vicinal oxygen chelate (VOC) domain
	T459_15984	4072.A0A2G2Z7F5	GO Process	GO:0006355	Regulation of transcription, DNA-templated
	T459_15984	4072.A0A2G2Z7F5	GO Process	GO:0006357	Regulation of transcription by RNA polymerase II
	T459_15984	4072.A0A2G2Z7F5	GO Process	GO:0009889	Regulation of biosynthetic process
	T459_15984	4072.A0A2G2Z7F5	GO Process	GO:0009891	Positive regulation of biosynthetic process
	T459_15984	4072.A0A2G2Z7F5	GO Process	GO:0009893	Positive regulation of metabolic process
	T459_15984	4072.A0A2G2Z7F5	GO Process	GO:0010468	Regulation of gene expression
	T459_15984	4072.A0A2G2Z7F5	GO Process	GO:0010556	Regulation of macromolecule biosynthetic process
	T459_15984	4072.A0A2G2Z7F5	GO Process	GO:0010557	Positive regulation of macromolecule biosynthetic process
	T459_15984	4072.A0A2G2Z7F5	GO Process	GO:0010604	Positive regulation of macromolecule metabolic process
	T459_15984	4072.A0A2G2Z7F5	GO Process	GO:0019219	Regulation of nucleobase-containing compound metabolic process
	T459_15984	4072.A0A2G2Z7F5	GO Process	GO:0019222	Regulation of metabolic process
	T459_15984	4072.A0A2G2Z7F5	GO Process	GO:0031323	Regulation of cellular metabolic process
	T459_15984	4072.A0A2G2Z7F5	GO Process	GO:0031325	Positive regulation of cellular metabolic process
	T459_15984	4072.A0A2G2Z7F5	GO Process	GO:0031326	Regulation of cellular biosynthetic process
	T459_15984	4072.A0A2G2Z7F5	GO Process	GO:0031328	Positive regulation of cellular biosynthetic process
	T459_15984	4072.A0A2G2Z7F5	GO Process	GO:0045893	Positive regulation of transcription, DNA-templated
	T459_15984	4072.A0A2G2Z7F5	GO Process	GO:0045935	Positive regulation of nucleobase-containing compound metabolic process
	T459_15984	4072.A0A2G2Z7F5	GO Process	GO:0045944	Positive regulation of transcription by RNA polymerase II
	T459_15984	4072.A0A2G2Z7F5	GO Process	GO:0048518	Positive regulation of biological process
	T459_15984	4072.A0A2G2Z7F5	GO Process	GO:0048522	Positive regulation of cellular process
	T459_15984	4072.A0A2G2Z7F5	GO Process	GO:0050789	Regulation of biological process
	T459_15984	4072.A0A2G2Z7F5	GO Process	GO:0050794	Regulation of cellular process
	T459_15984	4072.A0A2G2Z7F5	GO Process	GO:0051171	Regulation of nitrogen compound metabolic process
	T459_15984	4072.A0A2G2Z7F5	GO Process	GO:0051173	Positive regulation of nitrogen compound metabolic process
	T459_15984	4072.A0A2G2Z7F5	GO Process	GO:0051252	Regulation of RNA metabolic process
	T459_15984	4072.A0A2G2Z7F5	GO Process	GO:0051254	Positive regulation of RNA metabolic process
	T459_15984	4072.A0A2G2Z7F5	GO Process	GO:0060255	Regulation of macromolecule metabolic process
	T459_15984	4072.A0A2G2Z7F5	GO Process	GO:0065007	Biological regulation
	T459_15984	4072.A0A2G2Z7F5	GO Process	GO:0080090	Regulation of primary metabolic process
	T459_15984	4072.A0A2G2Z7F5	GO Process	GO:1902680	Positive regulation of RNA biosynthetic process
	T459_15984	4072.A0A2G2Z7F5	GO Process	GO:1903506	Regulation of nucleic acid-templated transcription
	T459_15984	4072.A0A2G2Z7F5	GO Process	GO:1903508	Positive regulation of nucleic acid-templated transcription
	T459_15984	4072.A0A2G2Z7F5	GO Process	GO:2001141	Regulation of RNA biosynthetic process
	T459_15984	4072.A0A2G2Z7F5	GO Function	GO:0003712	Transcription coregulator activity
	T459_15984	4072.A0A2G2Z7F5	GO Function	GO:0140110	Transcription regulator activity
	T459_15984	4072.A0A2G2Z7F5	GO Component	GO:0005622	Intracellular anatomical structure
	T459_15984	4072.A0A2G2Z7F5	GO Component	GO:0005634	Nucleus
	T459_15984	4072.A0A2G2Z7F5	GO Component	GO:0016592	Mediator complex
	T459_15984	4072.A0A2G2Z7F5	GO Component	GO:0032991	Protein-containing complex
	T459_15984	4072.A0A2G2Z7F5	GO Component	GO:0043226	Organelle
	T459_15984	4072.A0A2G2Z7F5	GO Component	GO:0043227	Membrane-bounded organelle
	T459_15984	4072.A0A2G2Z7F5	GO Component	GO:0043229	Intracellular organelle
	T459_15984	4072.A0A2G2Z7F5	GO Component	GO:0043231	Intracellular membrane-bounded organelle
	T459_15984	4072.A0A2G2Z7F5	GO Component	GO:0110165	Cellular anatomical entity
	T459_15984	4072.A0A2G2Z7F5	GO Component	GO:0140513	Nuclear protein-containing complex
	T459_15984	4072.A0A2G2Z7F5	STRING clusters	CL:12733	Mediator complex
	T459_15984	4072.A0A2G2Z7F5	STRING clusters	CL:12794	Mediator complex
	T459_15984	4072.A0A2G2Z7F5	STRING clusters	CL:12796	Mediator complex
	T459_15984	4072.A0A2G2Z7F5	STRING clusters	CL:12798	Mixed, incl. Mediator complex, subunit Med19, metazoa, and Metabolism of nitric oxide: NOS3 activation and regulation
	T459_15984	4072.A0A2G2Z7F5	COMPARTMENTS	GOCC:0005622	Intracellular
	T459_15984	4072.A0A2G2Z7F5	COMPARTMENTS	GOCC:0005634	Nucleus
	T459_15984	4072.A0A2G2Z7F5	COMPARTMENTS	GOCC:0005654	Nucleoplasm
	T459_15984	4072.A0A2G2Z7F5	COMPARTMENTS	GOCC:0016592	Mediator complex
	T459_15984	4072.A0A2G2Z7F5	COMPARTMENTS	GOCC:0031974	Membrane-enclosed lumen
	T459_15984	4072.A0A2G2Z7F5	COMPARTMENTS	GOCC:0031981	Nuclear lumen
	T459_15984	4072.A0A2G2Z7F5	COMPARTMENTS	GOCC:0032991	Protein-containing complex
	T459_15984	4072.A0A2G2Z7F5	COMPARTMENTS	GOCC:0043226	Organelle
	T459_15984	4072.A0A2G2Z7F5	COMPARTMENTS	GOCC:0043227	Membrane-bounded organelle
	T459_15984	4072.A0A2G2Z7F5	COMPARTMENTS	GOCC:0043229	Intracellular organelle
	T459_15984	4072.A0A2G2Z7F5	COMPARTMENTS	GOCC:0043231	Intracellular membrane-bounded organelle
	T459_15984	4072.A0A2G2Z7F5	COMPARTMENTS	GOCC:0043233	Organelle lumen
	T459_15984	4072.A0A2G2Z7F5	COMPARTMENTS	GOCC:0070013	Intracellular organelle lumen
	T459_15984	4072.A0A2G2Z7F5	COMPARTMENTS	GOCC:0110165	Cellular anatomical entity
	T459_15984	4072.A0A2G2Z7F5	InterPro	IPR019403	Mediator complex, subunit Med19, metazoa
	T459_16793	4072.A0A2G2ZA18	GO Component	GO:0005622	Intracellular anatomical structure
	T459_16793	4072.A0A2G2ZA18	GO Component	GO:0005737	Cytoplasm
	T459_16793	4072.A0A2G2ZA18	GO Component	GO:0009507	Chloroplast
	T459_16793	4072.A0A2G2ZA18	GO Component	GO:0009532	Plastid stroma
	T459_16793	4072.A0A2G2ZA18	GO Component	GO:0009536	Plastid
	T459_16793	4072.A0A2G2ZA18	GO Component	GO:0009570	Chloroplast stroma
	T459_16793	4072.A0A2G2ZA18	GO Component	GO:0043226	Organelle
	T459_16793	4072.A0A2G2ZA18	GO Component	GO:0043227	Membrane-bounded organelle
	T459_16793	4072.A0A2G2ZA18	GO Component	GO:0043229	Intracellular organelle
	T459_16793	4072.A0A2G2ZA18	GO Component	GO:0043231	Intracellular membrane-bounded organelle
	T459_16793	4072.A0A2G2ZA18	GO Component	GO:0110165	Cellular anatomical entity
	T459_16793	4072.A0A2G2ZA18	STRING clusters	CL:25937	Microtubule motor activity, and Protein import
	T459_16793	4072.A0A2G2ZA18	COMPARTMENTS	GOCC:0000323	Lytic vacuole
	T459_16793	4072.A0A2G2ZA18	COMPARTMENTS	GOCC:0005622	Intracellular
	T459_16793	4072.A0A2G2ZA18	COMPARTMENTS	GOCC:0005737	Cytoplasm
	T459_16793	4072.A0A2G2ZA18	COMPARTMENTS	GOCC:0005764	Lysosome
	T459_16793	4072.A0A2G2ZA18	COMPARTMENTS	GOCC:0005765	Lysosomal membrane
	T459_16793	4072.A0A2G2ZA18	COMPARTMENTS	GOCC:0005773	Vacuole
	T459_16793	4072.A0A2G2ZA18	COMPARTMENTS	GOCC:0005774	Vacuolar membrane
	T459_16793	4072.A0A2G2ZA18	COMPARTMENTS	GOCC:0016020	Membrane
	T459_16793	4072.A0A2G2ZA18	COMPARTMENTS	GOCC:0031090	Organelle membrane
	T459_16793	4072.A0A2G2ZA18	COMPARTMENTS	GOCC:0043226	Organelle
	T459_16793	4072.A0A2G2ZA18	COMPARTMENTS	GOCC:0043227	Membrane-bounded organelle
	T459_16793	4072.A0A2G2ZA18	COMPARTMENTS	GOCC:0043229	Intracellular organelle
	T459_16793	4072.A0A2G2ZA18	COMPARTMENTS	GOCC:0043231	Intracellular membrane-bounded organelle
	T459_16793	4072.A0A2G2ZA18	COMPARTMENTS	GOCC:0098588	Bounding membrane of organelle
	T459_16793	4072.A0A2G2ZA18	COMPARTMENTS	GOCC:0098852	Lytic vacuole membrane
	T459_16793	4072.A0A2G2ZA18	COMPARTMENTS	GOCC:0110165	Cellular anatomical entity
	T459_16793	4072.A0A2G2ZA18	InterPro	IPR036291	NAD(P)-binding domain superfamily
	T459_17095	4072.A0A1U8H1N2	GO Process	GO:0009987	Cellular process
	T459_17095	4072.A0A1U8H1N2	GO Function	GO:0003676	Nucleic acid binding
	T459_17095	4072.A0A1U8H1N2	GO Function	GO:0003723	RNA binding
	T459_17095	4072.A0A1U8H1N2	GO Function	GO:0005488	Binding
	T459_17095	4072.A0A1U8H1N2	GO Function	GO:0097159	Organic cyclic compound binding
	T459_17095	4072.A0A1U8H1N2	GO Function	GO:1901363	Heterocyclic compound binding
	T459_17095	4072.A0A1U8H1N2	GO Component	GO:0005622	Intracellular anatomical structure
	T459_17095	4072.A0A1U8H1N2	GO Component	GO:0005634	Nucleus
	T459_17095	4072.A0A1U8H1N2	GO Component	GO:0005737	Cytoplasm
	T459_17095	4072.A0A1U8H1N2	GO Component	GO:0043226	Organelle
	T459_17095	4072.A0A1U8H1N2	GO Component	GO:0043227	Membrane-bounded organelle
	T459_17095	4072.A0A1U8H1N2	GO Component	GO:0043229	Intracellular organelle
	T459_17095	4072.A0A1U8H1N2	GO Component	GO:0043231	Intracellular membrane-bounded organelle
	T459_17095	4072.A0A1U8H1N2	GO Component	GO:0110165	Cellular anatomical entity
	T459_17095	4072.A0A1U8H1N2	STRING clusters	CL:45271	Mostly uncharacterized, incl. Agenet-like domain, and Glycosyl transferase, family 31
	T459_17095	4072.A0A1U8H1N2	STRING clusters	CL:45273	Mostly uncharacterized, incl. Glycosyl transferase, family 31, and Squamosa promoter-binding-like protein
	T459_17095	4072.A0A1U8H1N2	STRING clusters	CL:45274	Mostly uncharacterized, incl. Squamosa promoter-binding-like protein, and Nucleologenesis
	T459_17095	4072.A0A1U8H1N2	STRING clusters	CL:45350	Mixed, incl. Membrane-anchored ubiquitin-fold protein, and Uncharacterised conserved protein UCP030333, DNA/RNA-binding Alba-related
	T459_17095	4072.A0A1U8H1N2	COMPARTMENTS	GOCC:0005622	Intracellular
	T459_17095	4072.A0A1U8H1N2	COMPARTMENTS	GOCC:0110165	Cellular anatomical entity
	T459_17095	4072.A0A1U8H1N2	Pfam	PF01918	Alba
	T459_17095	4072.A0A1U8H1N2	InterPro	IPR002775	DNA/RNA-binding protein Alba-like
	T459_17095	4072.A0A1U8H1N2	InterPro	IPR014560	Uncharacterised conserved protein UCP030333, DNA/RNA-binding Alba-related
	T459_17095	4072.A0A1U8H1N2	InterPro	IPR036882	Alba-like domain superfamily
	T459_17666	4072.A0A2G2ZCE1	GO Process	GO:0000160	Phosphorelay signal transduction system
	T459_17666	4072.A0A2G2ZCE1	GO Process	GO:0007154	Cell communication
	T459_17666	4072.A0A2G2ZCE1	GO Process	GO:0007165	Signal transduction
	T459_17666	4072.A0A2G2ZCE1	GO Process	GO:0009719	Response to endogenous stimulus
	T459_17666	4072.A0A2G2ZCE1	GO Process	GO:0009725	Response to hormone
	T459_17666	4072.A0A2G2ZCE1	GO Process	GO:0009735	Response to cytokinin
	T459_17666	4072.A0A2G2ZCE1	GO Process	GO:0009736	Cytokinin-activated signaling pathway
	T459_17666	4072.A0A2G2ZCE1	GO Process	GO:0009755	Hormone-mediated signaling pathway
	T459_17666	4072.A0A2G2ZCE1	GO Process	GO:0009987	Cellular process
	T459_17666	4072.A0A2G2ZCE1	GO Process	GO:0010033	Response to organic substance
	T459_17666	4072.A0A2G2ZCE1	GO Process	GO:0023052	Signaling
	T459_17666	4072.A0A2G2ZCE1	GO Process	GO:0032870	Cellular response to hormone stimulus
	T459_17666	4072.A0A2G2ZCE1	GO Process	GO:0035556	Intracellular signal transduction
	T459_17666	4072.A0A2G2ZCE1	GO Process	GO:0042221	Response to chemical
	T459_17666	4072.A0A2G2ZCE1	GO Process	GO:0048511	Rhythmic process
	T459_17666	4072.A0A2G2ZCE1	GO Process	GO:0050789	Regulation of biological process
	T459_17666	4072.A0A2G2ZCE1	GO Process	GO:0050794	Regulation of cellular process
	T459_17666	4072.A0A2G2ZCE1	GO Process	GO:0050896	Response to stimulus
	T459_17666	4072.A0A2G2ZCE1	GO Process	GO:0051716	Cellular response to stimulus
	T459_17666	4072.A0A2G2ZCE1	GO Process	GO:0065007	Biological regulation
	T459_17666	4072.A0A2G2ZCE1	GO Process	GO:0070887	Cellular response to chemical stimulus
	T459_17666	4072.A0A2G2ZCE1	GO Process	GO:0071310	Cellular response to organic substance
	T459_17666	4072.A0A2G2ZCE1	GO Process	GO:0071368	Cellular response to cytokinin stimulus
	T459_17666	4072.A0A2G2ZCE1	GO Process	GO:0071495	Cellular response to endogenous stimulus
	T459_17666	4072.A0A2G2ZCE1	GO Function	GO:0003676	Nucleic acid binding
	T459_17666	4072.A0A2G2ZCE1	GO Function	GO:0003677	DNA binding
	T459_17666	4072.A0A2G2ZCE1	GO Function	GO:0005488	Binding
	T459_17666	4072.A0A2G2ZCE1	GO Function	GO:0097159	Organic cyclic compound binding
	T459_17666	4072.A0A2G2ZCE1	GO Function	GO:1901363	Heterocyclic compound binding
	T459_17666	4072.A0A2G2ZCE1	GO Component	GO:0005622	Intracellular anatomical structure
	T459_17666	4072.A0A2G2ZCE1	GO Component	GO:0005634	Nucleus
	T459_17666	4072.A0A2G2ZCE1	GO Component	GO:0043226	Organelle
	T459_17666	4072.A0A2G2ZCE1	GO Component	GO:0043227	Membrane-bounded organelle
	T459_17666	4072.A0A2G2ZCE1	GO Component	GO:0043229	Intracellular organelle
	T459_17666	4072.A0A2G2ZCE1	GO Component	GO:0043231	Intracellular membrane-bounded organelle
	T459_17666	4072.A0A2G2ZCE1	GO Component	GO:0110165	Cellular anatomical entity
	T459_17666	4072.A0A2G2ZCE1	STRING clusters	CL:21562	Mixed, incl. CheY-like superfamily, and Peptidase S1, PA clan
	T459_17666	4072.A0A2G2ZCE1	STRING clusters	CL:21563	Mixed, incl. CheY-like superfamily, and Peptidase S1, PA clan
	T459_17666	4072.A0A2G2ZCE1	STRING clusters	CL:21735	Mixed, incl. Circadian rhythm - plant, and Rhythmic process
	T459_17666	4072.A0A2G2ZCE1	STRING clusters	CL:21737	Mixed, incl. Circadian rhythm - plant, and Basic helix-loop-helix (bHLH) transcription factors ALC-like, plant
	T459_17666	4072.A0A2G2ZCE1	STRING clusters	CL:21738	Mixed, incl. Circadian rhythm - plant, and Photoreceptor activity
	T459_17666	4072.A0A2G2ZCE1	STRING clusters	CL:21739	Mixed, incl. Circadian rhythm - plant, and Phytochrome A/B/C/D/E-like, histidine-kinase-related domain
	T459_17666	4072.A0A2G2ZCE1	Reactome	MAP-109582	Hemostasis
	T459_17666	4072.A0A2G2ZCE1	Reactome	MAP-983231	Factors involved in megakaryocyte development and platelet production
	T459_17666	4072.A0A2G2ZCE1	COMPARTMENTS	GOCC:0005622	Intracellular
	T459_17666	4072.A0A2G2ZCE1	COMPARTMENTS	GOCC:0005634	Nucleus
	T459_17666	4072.A0A2G2ZCE1	COMPARTMENTS	GOCC:0043226	Organelle
	T459_17666	4072.A0A2G2ZCE1	COMPARTMENTS	GOCC:0043227	Membrane-bounded organelle
	T459_17666	4072.A0A2G2ZCE1	COMPARTMENTS	GOCC:0043229	Intracellular organelle
	T459_17666	4072.A0A2G2ZCE1	COMPARTMENTS	GOCC:0043231	Intracellular membrane-bounded organelle
	T459_17666	4072.A0A2G2ZCE1	COMPARTMENTS	GOCC:0110165	Cellular anatomical entity
	T459_18342	4072.A0A2G2ZE81	GO Process	GO:0002237	Response to molecule of bacterial origin
	T459_18342	4072.A0A2G2ZE81	GO Process	GO:0002376	Immune system process
	T459_18342	4072.A0A2G2ZE81	GO Process	GO:0002682	Regulation of immune system process
	T459_18342	4072.A0A2G2ZE81	GO Process	GO:0002683	Negative regulation of immune system process
	T459_18342	4072.A0A2G2ZE81	GO Process	GO:0002831	Regulation of response to biotic stimulus
	T459_18342	4072.A0A2G2ZE81	GO Process	GO:0002832	Negative regulation of response to biotic stimulus
	T459_18342	4072.A0A2G2ZE81	GO Process	GO:0006468	Protein phosphorylation
	T459_18342	4072.A0A2G2ZE81	GO Process	GO:0006793	Phosphorus metabolic process
	T459_18342	4072.A0A2G2ZE81	GO Process	GO:0006796	Phosphate-containing compound metabolic process
	T459_18342	4072.A0A2G2ZE81	GO Process	GO:0006807	Nitrogen compound metabolic process
	T459_18342	4072.A0A2G2ZE81	GO Process	GO:0006950	Response to stress
	T459_18342	4072.A0A2G2ZE81	GO Process	GO:0006952	Defense response
	T459_18342	4072.A0A2G2ZE81	GO Process	GO:0006955	Immune response
	T459_18342	4072.A0A2G2ZE81	GO Process	GO:0008152	Metabolic process
	T459_18342	4072.A0A2G2ZE81	GO Process	GO:0008219	Cell death
	T459_18342	4072.A0A2G2ZE81	GO Process	GO:0009605	Response to external stimulus
	T459_18342	4072.A0A2G2ZE81	GO Process	GO:0009607	Response to biotic stimulus
	T459_18342	4072.A0A2G2ZE81	GO Process	GO:0009617	Response to bacterium
	T459_18342	4072.A0A2G2ZE81	GO Process	GO:0009987	Cellular process
	T459_18342	4072.A0A2G2ZE81	GO Process	GO:0010033	Response to organic substance
	T459_18342	4072.A0A2G2ZE81	GO Process	GO:0010363	Regulation of plant-type hypersensitive response
	T459_18342	4072.A0A2G2ZE81	GO Process	GO:0010941	Regulation of cell death
	T459_18342	4072.A0A2G2ZE81	GO Process	GO:0012501	Programmed cell death
	T459_18342	4072.A0A2G2ZE81	GO Process	GO:0016310	Phosphorylation
	T459_18342	4072.A0A2G2ZE81	GO Process	GO:0019538	Protein metabolic process
	T459_18342	4072.A0A2G2ZE81	GO Process	GO:0031347	Regulation of defense response
	T459_18342	4072.A0A2G2ZE81	GO Process	GO:0031348	Negative regulation of defense response
	T459_18342	4072.A0A2G2ZE81	GO Process	GO:0032101	Regulation of response to external stimulus
	T459_18342	4072.A0A2G2ZE81	GO Process	GO:0032102	Negative regulation of response to external stimulus
	T459_18342	4072.A0A2G2ZE81	GO Process	GO:0033554	Cellular response to stress
	T459_18342	4072.A0A2G2ZE81	GO Process	GO:0034050	Programmed cell death induced by symbiont
	T459_18342	4072.A0A2G2ZE81	GO Process	GO:0036211	Protein modification process
	T459_18342	4072.A0A2G2ZE81	GO Process	GO:0042221	Response to chemical
	T459_18342	4072.A0A2G2ZE81	GO Process	GO:0042742	Defense response to bacterium
	T459_18342	4072.A0A2G2ZE81	GO Process	GO:0043067	Regulation of programmed cell death
	T459_18342	4072.A0A2G2ZE81	GO Process	GO:0043069	Negative regulation of programmed cell death
	T459_18342	4072.A0A2G2ZE81	GO Process	GO:0043170	Macromolecule metabolic process
	T459_18342	4072.A0A2G2ZE81	GO Process	GO:0043207	Response to external biotic stimulus
	T459_18342	4072.A0A2G2ZE81	GO Process	GO:0043412	Macromolecule modification
	T459_18342	4072.A0A2G2ZE81	GO Process	GO:0043903	Regulation of biological process involved in symbiotic interaction
	T459_18342	4072.A0A2G2ZE81	GO Process	GO:0044237	Cellular metabolic process
	T459_18342	4072.A0A2G2ZE81	GO Process	GO:0044238	Primary metabolic process
	T459_18342	4072.A0A2G2ZE81	GO Process	GO:0044403	Biological process involved in symbiotic interaction
	T459_18342	4072.A0A2G2ZE81	GO Process	GO:0044419	Biological process involved in interspecies interaction between organisms
	T459_18342	4072.A0A2G2ZE81	GO Process	GO:0045087	Innate immune response
	T459_18342	4072.A0A2G2ZE81	GO Process	GO:0045088	Regulation of innate immune response
	T459_18342	4072.A0A2G2ZE81	GO Process	GO:0045824	Negative regulation of innate immune response
	T459_18342	4072.A0A2G2ZE81	GO Process	GO:0048519	Negative regulation of biological process
	T459_18342	4072.A0A2G2ZE81	GO Process	GO:0048523	Negative regulation of cellular process
	T459_18342	4072.A0A2G2ZE81	GO Process	GO:0048583	Regulation of response to stimulus
	T459_18342	4072.A0A2G2ZE81	GO Process	GO:0048585	Negative regulation of response to stimulus
	T459_18342	4072.A0A2G2ZE81	GO Process	GO:0050776	Regulation of immune response
	T459_18342	4072.A0A2G2ZE81	GO Process	GO:0050777	Negative regulation of immune response
	T459_18342	4072.A0A2G2ZE81	GO Process	GO:0050789	Regulation of biological process
	T459_18342	4072.A0A2G2ZE81	GO Process	GO:0050794	Regulation of cellular process
	T459_18342	4072.A0A2G2ZE81	GO Process	GO:0050896	Response to stimulus
	T459_18342	4072.A0A2G2ZE81	GO Process	GO:0051702	Biological process involved in interaction with symbiont
	T459_18342	4072.A0A2G2ZE81	GO Process	GO:0051707	Response to other organism
	T459_18342	4072.A0A2G2ZE81	GO Process	GO:0051716	Cellular response to stimulus
	T459_18342	4072.A0A2G2ZE81	GO Process	GO:0060548	Negative regulation of cell death
	T459_18342	4072.A0A2G2ZE81	GO Process	GO:0065007	Biological regulation
	T459_18342	4072.A0A2G2ZE81	GO Process	GO:0071704	Organic substance metabolic process
	T459_18342	4072.A0A2G2ZE81	GO Process	GO:0080134	Regulation of response to stress
	T459_18342	4072.A0A2G2ZE81	GO Process	GO:0080135	Regulation of cellular response to stress
	T459_18342	4072.A0A2G2ZE81	GO Process	GO:0098542	Defense response to other organism
	T459_18342	4072.A0A2G2ZE81	GO Process	GO:1901564	Organonitrogen compound metabolic process
	T459_18342	4072.A0A2G2ZE81	GO Component	GO:0005886	Plasma membrane
	T459_18342	4072.A0A2G2ZE81	GO Component	GO:0016020	Membrane
	T459_18342	4072.A0A2G2ZE81	GO Component	GO:0016021	Integral component of membrane
	T459_18342	4072.A0A2G2ZE81	GO Component	GO:0031224	Intrinsic component of membrane
	T459_18342	4072.A0A2G2ZE81	GO Component	GO:0071944	Cell periphery
	T459_18342	4072.A0A2G2ZE81	GO Component	GO:0110165	Cellular anatomical entity
	T459_18342	4072.A0A2G2ZE81	STRING clusters	CL:61279	Mixed, incl. Toll - interleukin 1 - resistance, and RPM1-interacting protein 4/NOI4
	T459_18342	4072.A0A2G2ZE81	STRING clusters	CL:61280	Mixed, incl. Toll - interleukin 1 - resistance, and RPM1-interacting protein 4/NOI4
	T459_18342	4072.A0A2G2ZE81	STRING clusters	CL:61319	Mixed, incl. RPM1-interacting protein 4/NOI4, and AtDRB-like, second double-stranded RNA binding domain, plant
	T459_18342	4072.A0A2G2ZE81	STRING clusters	CL:61337	RPM1-interacting protein 4/NOI4, and Plant-pathogen interaction
	T459_18342	4072.A0A2G2ZE81	KEGG	cann04626	Plant-pathogen interaction
	T459_18342	4072.A0A2G2ZE81	COMPARTMENTS	GOCC:0005622	Intracellular
	T459_18342	4072.A0A2G2ZE81	COMPARTMENTS	GOCC:0005886	Plasma membrane
	T459_18342	4072.A0A2G2ZE81	COMPARTMENTS	GOCC:0016020	Membrane
	T459_18342	4072.A0A2G2ZE81	COMPARTMENTS	GOCC:0019897	Extrinsic component of plasma membrane
	T459_18342	4072.A0A2G2ZE81	COMPARTMENTS	GOCC:0019898	Extrinsic component of membrane
	T459_18342	4072.A0A2G2ZE81	COMPARTMENTS	GOCC:0030257	Type III protein secretion system complex
	T459_18342	4072.A0A2G2ZE81	COMPARTMENTS	GOCC:0032991	Protein-containing complex
	T459_18342	4072.A0A2G2ZE81	COMPARTMENTS	GOCC:0071944	Cell periphery
	T459_18342	4072.A0A2G2ZE81	COMPARTMENTS	GOCC:0110165	Cellular anatomical entity
	T459_18342	4072.A0A2G2ZE81	Pfam	PF05627	Cleavage site for pathogenic type III effector avirulence factor Avr
	T459_18342	4072.A0A2G2ZE81	InterPro	IPR008700	RIN4, pathogenic type III effector avirulence factor Avr cleavage site
	T459_18342	4072.A0A2G2ZE81	InterPro	IPR040387	RPM1-interacting protein 4/NOI4
	T459_18366	4072.A0A1U8FIR1	GO Process	GO:0006996	Organelle organization
	T459_18366	4072.A0A1U8FIR1	GO Process	GO:0009657	Plastid organization
	T459_18366	4072.A0A1U8FIR1	GO Process	GO:0009658	Chloroplast organization
	T459_18366	4072.A0A1U8FIR1	GO Process	GO:0009987	Cellular process
	T459_18366	4072.A0A1U8FIR1	GO Process	GO:0010020	Chloroplast fission
	T459_18366	4072.A0A1U8FIR1	GO Process	GO:0016043	Cellular component organization
	T459_18366	4072.A0A1U8FIR1	GO Process	GO:0043572	Plastid fission
	T459_18366	4072.A0A1U8FIR1	GO Process	GO:0048285	Organelle fission
	T459_18366	4072.A0A1U8FIR1	GO Process	GO:0071840	Cellular component organization or biogenesis
	T459_18366	4072.A0A1U8FIR1	GO Process	GO:0090143	Nucleoid organization
	T459_18366	4072.A0A1U8FIR1	GO Component	GO:0005622	Intracellular anatomical structure
	T459_18366	4072.A0A1U8FIR1	GO Component	GO:0005737	Cytoplasm
	T459_18366	4072.A0A1U8FIR1	GO Component	GO:0005829	Cytosol
	T459_18366	4072.A0A1U8FIR1	GO Component	GO:0009507	Chloroplast
	T459_18366	4072.A0A1U8FIR1	GO Component	GO:0009526	Plastid envelope
	T459_18366	4072.A0A1U8FIR1	GO Component	GO:0009534	Chloroplast thylakoid
	T459_18366	4072.A0A1U8FIR1	GO Component	GO:0009535	Chloroplast thylakoid membrane
	T459_18366	4072.A0A1U8FIR1	GO Component	GO:0009536	Plastid
	T459_18366	4072.A0A1U8FIR1	GO Component	GO:0009579	Thylakoid
	T459_18366	4072.A0A1U8FIR1	GO Component	GO:0009941	Chloroplast envelope
	T459_18366	4072.A0A1U8FIR1	GO Component	GO:0016020	Membrane
	T459_18366	4072.A0A1U8FIR1	GO Component	GO:0016021	Integral component of membrane
	T459_18366	4072.A0A1U8FIR1	GO Component	GO:0031090	Organelle membrane
	T459_18366	4072.A0A1U8FIR1	GO Component	GO:0031224	Intrinsic component of membrane
	T459_18366	4072.A0A1U8FIR1	GO Component	GO:0031967	Organelle envelope
	T459_18366	4072.A0A1U8FIR1	GO Component	GO:0031975	Envelope
	T459_18366	4072.A0A1U8FIR1	GO Component	GO:0031976	Plastid thylakoid
	T459_18366	4072.A0A1U8FIR1	GO Component	GO:0031984	Organelle subcompartment
	T459_18366	4072.A0A1U8FIR1	GO Component	GO:0034357	Photosynthetic membrane
	T459_18366	4072.A0A1U8FIR1	GO Component	GO:0042170	Plastid membrane
	T459_18366	4072.A0A1U8FIR1	GO Component	GO:0042651	Thylakoid membrane
	T459_18366	4072.A0A1U8FIR1	GO Component	GO:0043226	Organelle
	T459_18366	4072.A0A1U8FIR1	GO Component	GO:0043227	Membrane-bounded organelle
	T459_18366	4072.A0A1U8FIR1	GO Component	GO:0043229	Intracellular organelle
	T459_18366	4072.A0A1U8FIR1	GO Component	GO:0043231	Intracellular membrane-bounded organelle
	T459_18366	4072.A0A1U8FIR1	GO Component	GO:0055035	Plastid thylakoid membrane
	T459_18366	4072.A0A1U8FIR1	GO Component	GO:0110165	Cellular anatomical entity
	T459_18366	4072.A0A1U8FIR1	STRING clusters	CL:48434	Mixed, incl. Protein import into chloroplast stroma, and Plastid intermembrane space
	T459_18366	4072.A0A1U8FIR1	STRING clusters	CL:48435	Mixed, incl. Protein import into chloroplast stroma, and Plastid intermembrane space
	T459_18366	4072.A0A1U8FIR1	STRING clusters	CL:48439	Protein import into chloroplast stroma, and Plastid intermembrane space
	T459_18366	4072.A0A1U8FIR1	STRING clusters	CL:48452	Mixed, incl. Protein TIC56, and Nucleoid organization
	T459_18366	4072.A0A1U8FIR1	COMPARTMENTS	GOCC:0005622	Intracellular
	T459_18366	4072.A0A1U8FIR1	COMPARTMENTS	GOCC:0005737	Cytoplasm
	T459_18366	4072.A0A1U8FIR1	COMPARTMENTS	GOCC:0009507	Chloroplast
	T459_18366	4072.A0A1U8FIR1	COMPARTMENTS	GOCC:0009526	Plastid envelope
	T459_18366	4072.A0A1U8FIR1	COMPARTMENTS	GOCC:0009536	Plastid
	T459_18366	4072.A0A1U8FIR1	COMPARTMENTS	GOCC:0009579	Thylakoid
	T459_18366	4072.A0A1U8FIR1	COMPARTMENTS	GOCC:0009941	Chloroplast envelope
	T459_18366	4072.A0A1U8FIR1	COMPARTMENTS	GOCC:0016020	Membrane
	T459_18366	4072.A0A1U8FIR1	COMPARTMENTS	GOCC:0031967	Organelle envelope
	T459_18366	4072.A0A1U8FIR1	COMPARTMENTS	GOCC:0031975	Envelope
	T459_18366	4072.A0A1U8FIR1	COMPARTMENTS	GOCC:0034357	Photosynthetic membrane
	T459_18366	4072.A0A1U8FIR1	COMPARTMENTS	GOCC:0042651	Thylakoid membrane
	T459_18366	4072.A0A1U8FIR1	COMPARTMENTS	GOCC:0043226	Organelle
	T459_18366	4072.A0A1U8FIR1	COMPARTMENTS	GOCC:0043227	Membrane-bounded organelle
	T459_18366	4072.A0A1U8FIR1	COMPARTMENTS	GOCC:0043229	Intracellular organelle
[truncated: 1,710 more rows]

## Sheet: Sheet2
Table S4: Enriched functional pathways in the co-expression network of CazAAT genes in pepper under non-biotic stress.
Abiotic stress	Gene	identifier	category	term ID	term description
Cold stress	T459_00606	4072.A0A2G3AES2	GO Process	GO:0006082	Organic acid metabolic process
Cold stress	T459_00606	4072.A0A2G3AES2	GO Process	GO:0006520	Cellular amino acid metabolic process
Cold stress	T459_00606	4072.A0A2G3AES2	GO Process	GO:0006553	Lysine metabolic process
Cold stress	T459_00606	4072.A0A2G3AES2	GO Process	GO:0006807	Nitrogen compound metabolic process
Cold stress	T459_00606	4072.A0A2G3AES2	GO Process	GO:0008152	Metabolic process
Cold stress	T459_00606	4072.A0A2G3AES2	GO Process	GO:0008652	Cellular amino acid biosynthetic process
Cold stress	T459_00606	4072.A0A2G3AES2	GO Process	GO:0009058	Biosynthetic process
Cold stress	T459_00606	4072.A0A2G3AES2	GO Process	GO:0009066	Aspartate family amino acid metabolic process
Cold stress	T459_00606	4072.A0A2G3AES2	GO Process	GO:0009067	Aspartate family amino acid biosynthetic process
Cold stress	T459_00606	4072.A0A2G3AES2	GO Process	GO:0009085	Lysine biosynthetic process
Cold stress	T459_00606	4072.A0A2G3AES2	GO Process	GO:0009089	Lysine biosynthetic process via diaminopimelate
Cold stress	T459_00606	4072.A0A2G3AES2	GO Process	GO:0009987	Cellular process
Cold stress	T459_00606	4072.A0A2G3AES2	GO Process	GO:0016053	Organic acid biosynthetic process
Cold stress	T459_00606	4072.A0A2G3AES2	GO Process	GO:0019752	Carboxylic acid metabolic process
Cold stress	T459_00606	4072.A0A2G3AES2	GO Process	GO:0043436	Oxoacid metabolic process
Cold stress	T459_00606	4072.A0A2G3AES2	GO Process	GO:0043648	Dicarboxylic acid metabolic process
Cold stress	T459_00606	4072.A0A2G3AES2	GO Process	GO:0044237	Cellular metabolic process
Cold stress	T459_00606	4072.A0A2G3AES2	GO Process	GO:0044238	Primary metabolic process
Cold stress	T459_00606	4072.A0A2G3AES2	GO Process	GO:0044249	Cellular biosynthetic process
Cold stress	T459_00606	4072.A0A2G3AES2	GO Process	GO:0044281	Small molecule metabolic process
Cold stress	T459_00606	4072.A0A2G3AES2	GO Process	GO:0044283	Small molecule biosynthetic process
Cold stress	T459_00606	4072.A0A2G3AES2	GO Process	GO:0046394	Carboxylic acid biosynthetic process
Cold stress	T459_00606	4072.A0A2G3AES2	GO Process	GO:0046451	Diaminopimelate metabolic process
Cold stress	T459_00606	4072.A0A2G3AES2	GO Process	GO:0071704	Organic substance metabolic process
Cold stress	T459_00606	4072.A0A2G3AES2	GO Process	GO:1901564	Organonitrogen compound metabolic process
Cold stress	T459_00606	4072.A0A2G3AES2	GO Process	GO:1901566	Organonitrogen compound biosynthetic process
Cold stress	T459_00606	4072.A0A2G3AES2	GO Process	GO:1901576	Organic substance biosynthetic process
Cold stress	T459_00606	4072.A0A2G3AES2	GO Process	GO:1901605	Alpha-amino acid metabolic process
Cold stress	T459_00606	4072.A0A2G3AES2	GO Process	GO:1901607	Alpha-amino acid biosynthetic process
Cold stress	T459_01958	4072.A0A2G3AIJ7	GO Process	GO:0005975	Carbohydrate metabolic process
Cold stress	T459_01958	4072.A0A2G3AIJ7	GO Process	GO:0006040	Amino sugar metabolic process
Cold stress	T459_01958	4072.A0A2G3AIJ7	GO Process	GO:0006629	Lipid metabolic process
Cold stress	T459_01958	4072.A0A2G3AIJ7	GO Process	GO:0006643	Membrane lipid metabolic process
Cold stress	T459_01958	4072.A0A2G3AIJ7	GO Process	GO:0006644	Phospholipid metabolic process
Cold stress	T459_01958	4072.A0A2G3AIJ7	GO Process	GO:0006664	Glycolipid metabolic process
Cold stress	T459_01958	4072.A0A2G3AIJ7	GO Process	GO:0006793	Phosphorus metabolic process
Cold stress	T459_01958	4072.A0A2G3AIJ7	GO Process	GO:0006796	Phosphate-containing compound metabolic process
Cold stress	T459_01958	4072.A0A2G3AIJ7	GO Process	GO:0008152	Metabolic process
Cold stress	T459_01958	4072.A0A2G3AIJ7	GO Process	GO:0008610	Lipid biosynthetic process
Cold stress	T459_01958	4072.A0A2G3AIJ7	GO Process	GO:0008654	Phospholipid biosynthetic process
Cold stress	T459_01958	4072.A0A2G3AIJ7	GO Process	GO:0009058	Biosynthetic process
Cold stress	T459_01958	4072.A0A2G3AIJ7	GO Process	GO:0009245	Lipid A biosynthetic process
Cold stress	T459_01958	4072.A0A2G3AIJ7	GO Process	GO:0009247	Glycolipid biosynthetic process
Cold stress	T459_01958	4072.A0A2G3AIJ7	GO Process	GO:0009311	Oligosaccharide metabolic process
Cold stress	T459_01958	4072.A0A2G3AIJ7	GO Process	GO:0009312	Oligosaccharide biosynthetic process
Cold stress	T459_01958	4072.A0A2G3AIJ7	GO Process	GO:0009987	Cellular process
Cold stress	T459_01958	4072.A0A2G3AIJ7	GO Process	GO:0016051	Carbohydrate biosynthetic process
Cold stress	T459_01958	4072.A0A2G3AIJ7	GO Process	GO:0019637	Organophosphate metabolic process
Cold stress	T459_01958	4072.A0A2G3AIJ7	GO Process	GO:0044237	Cellular metabolic process
Cold stress	T459_01958	4072.A0A2G3AIJ7	GO Process	GO:0044238	Primary metabolic process
Cold stress	T459_01958	4072.A0A2G3AIJ7	GO Process	GO:0044249	Cellular biosynthetic process
Cold stress	T459_01958	4072.A0A2G3AIJ7	GO Process	GO:0044255	Cellular lipid metabolic process
Cold stress	T459_01958	4072.A0A2G3AIJ7	GO Process	GO:0046467	Membrane lipid biosynthetic process
Cold stress	T459_01958	4072.A0A2G3AIJ7	GO Process	GO:0046493	Lipid A metabolic process
Cold stress	T459_01958	4072.A0A2G3AIJ7	GO Process	GO:0071704	Organic substance metabolic process
Cold stress	T459_01958	4072.A0A2G3AIJ7	GO Process	GO:0090407	Organophosphate biosynthetic process
Cold stress	T459_01958	4072.A0A2G3AIJ7	GO Process	GO:1901135	Carbohydrate derivative metabolic process
Cold stress	T459_01958	4072.A0A2G3AIJ7	GO Process	GO:1901137	Carbohydrate derivative biosynthetic process
Cold stress	T459_01958	4072.A0A2G3AIJ7	GO Process	GO:1901269	Lipooligosaccharide metabolic process
Cold stress	T459_01958	4072.A0A2G3AIJ7	GO Process	GO:1901271	Lipooligosaccharide biosynthetic process
Cold stress	T459_01958	4072.A0A2G3AIJ7	GO Process	GO:1901576	Organic substance biosynthetic process
Cold stress	T459_01958	4072.A0A2G3AIJ7	GO Process	GO:1903509	Liposaccharide metabolic process
Cold stress	T459_02231	4072.A0A1U8H694	GO Process	GO:0000291	Nuclear-transcribed mRNA catabolic process, exonucleolytic
Cold stress	T459_02231	4072.A0A1U8H694	GO Process	GO:0000956	Nuclear-transcribed mRNA catabolic process
Cold stress	T459_02231	4072.A0A1U8H694	GO Process	GO:0006139	Nucleobase-containing compound metabolic process
Cold stress	T459_02231	4072.A0A1U8H694	GO Process	GO:0006364	rRNA processing
Cold stress	T459_02231	4072.A0A1U8H694	GO Process	GO:0006396	RNA processing
Cold stress	T459_02231	4072.A0A1U8H694	GO Process	GO:0006401	RNA catabolic process
Cold stress	T459_02231	4072.A0A1U8H694	GO Process	GO:0006402	mRNA catabolic process
Cold stress	T459_02231	4072.A0A1U8H694	GO Process	GO:0006725	Cellular aromatic compound metabolic process
Cold stress	T459_02231	4072.A0A1U8H694	GO Process	GO:0006807	Nitrogen compound metabolic process
Cold stress	T459_02231	4072.A0A1U8H694	GO Process	GO:0007275	Multicellular organism development
Cold stress	T459_02231	4072.A0A1U8H694	GO Process	GO:0008152	Metabolic process
Cold stress	T459_02231	4072.A0A1U8H694	GO Process	GO:0009056	Catabolic process
Cold stress	T459_02231	4072.A0A1U8H694	GO Process	GO:0009057	Macromolecule catabolic process
Cold stress	T459_02231	4072.A0A1U8H694	GO Process	GO:0009791	Post-embryonic development
Cold stress	T459_02231	4072.A0A1U8H694	GO Process	GO:0009845	Seed germination
Cold stress	T459_02231	4072.A0A1U8H694	GO Process	GO:0009892	Negative regulation of metabolic process
Cold stress	T459_02231	4072.A0A1U8H694	GO Process	GO:0009987	Cellular process
Cold stress	T459_02231	4072.A0A1U8H694	GO Process	GO:0010467	Gene expression
Cold stress	T459_02231	4072.A0A1U8H694	GO Process	GO:0010468	Regulation of gene expression
Cold stress	T459_02231	4072.A0A1U8H694	GO Process	GO:0010605	Negative regulation of macromolecule metabolic process
Cold stress	T459_02231	4072.A0A1U8H694	GO Process	GO:0010629	Negative regulation of gene expression
Cold stress	T459_02231	4072.A0A1U8H694	GO Process	GO:0016070	RNA metabolic process
Cold stress	T459_02231	4072.A0A1U8H694	GO Process	GO:0016071	mRNA metabolic process
Cold stress	T459_02231	4072.A0A1U8H694	GO Process	GO:0016072	rRNA metabolic process
Cold stress	T459_02231	4072.A0A1U8H694	GO Process	GO:0016073	snRNA metabolic process
Cold stress	T459_02231	4072.A0A1U8H694	GO Process	GO:0016074	sno(s)RNA metabolic process
Cold stress	T459_02231	4072.A0A1U8H694	GO Process	GO:0016075	rRNA catabolic process
Cold stress	T459_02231	4072.A0A1U8H694	GO Process	GO:0016180	snRNA processing
Cold stress	T459_02231	4072.A0A1U8H694	GO Process	GO:0019222	Regulation of metabolic process
Cold stress	T459_02231	4072.A0A1U8H694	GO Process	GO:0019439	Aromatic compound catabolic process
Cold stress	T459_02231	4072.A0A1U8H694	GO Process	GO:0022613	Ribonucleoprotein complex biogenesis
Cold stress	T459_02231	4072.A0A1U8H694	GO Process	GO:0031123	RNA 3-end processing
Cold stress	T459_02231	4072.A0A1U8H694	GO Process	GO:0031126	sno(s)RNA 3-end processing
Cold stress	T459_02231	4072.A0A1U8H694	GO Process	GO:0032501	Multicellular organismal process
Cold stress	T459_02231	4072.A0A1U8H694	GO Process	GO:0032502	Developmental process
Cold stress	T459_02231	4072.A0A1U8H694	GO Process	GO:0034427	Nuclear-transcribed mRNA catabolic process, exonucleolytic, 3-5
Cold stress	T459_02231	4072.A0A1U8H694	GO Process	GO:0034470	ncRNA processing
Cold stress	T459_02231	4072.A0A1U8H694	GO Process	GO:0034472	snRNA 3-end processing
Cold stress	T459_02231	4072.A0A1U8H694	GO Process	GO:0034475	U4 snRNA 3-end processing
Cold stress	T459_02231	4072.A0A1U8H694	GO Process	GO:0034641	Cellular nitrogen compound metabolic process
Cold stress	T459_02231	4072.A0A1U8H694	GO Process	GO:0034655	Nucleobase-containing compound catabolic process
Cold stress	T459_02231	4072.A0A1U8H694	GO Process	GO:0034660	ncRNA metabolic process
Cold stress	T459_02231	4072.A0A1U8H694	GO Process	GO:0034661	ncRNA catabolic process
Cold stress	T459_02231	4072.A0A1U8H694	GO Process	GO:0042254	Ribosome biogenesis
Cold stress	T459_02231	4072.A0A1U8H694	GO Process	GO:0043144	sno(s)RNA processing
Cold stress	T459_02231	4072.A0A1U8H694	GO Process	GO:0043170	Macromolecule metabolic process
Cold stress	T459_02231	4072.A0A1U8H694	GO Process	GO:0043628	Small regulatory ncRNA 3-end processing
Cold stress	T459_02231	4072.A0A1U8H694	GO Process	GO:0044085	Cellular component biogenesis
Cold stress	T459_02231	4072.A0A1U8H694	GO Process	GO:0044237	Cellular metabolic process
Cold stress	T459_02231	4072.A0A1U8H694	GO Process	GO:0044238	Primary metabolic process
Cold stress	T459_02231	4072.A0A1U8H694	GO Process	GO:0044248	Cellular catabolic process
Cold stress	T459_02231	4072.A0A1U8H694	GO Process	GO:0044260	Cellular macromolecule metabolic process
Cold stress	T459_02231	4072.A0A1U8H694	GO Process	GO:0044265	Cellular macromolecule catabolic process
Cold stress	T459_02231	4072.A0A1U8H694	GO Process	GO:0044270	Cellular nitrogen compound catabolic process
Cold stress	T459_02231	4072.A0A1U8H694	GO Process	GO:0046483	Heterocycle metabolic process
Cold stress	T459_02231	4072.A0A1U8H694	GO Process	GO:0046700	Heterocycle catabolic process
Cold stress	T459_02231	4072.A0A1U8H694	GO Process	GO:0048519	Negative regulation of biological process
Cold stress	T459_02231	4072.A0A1U8H694	GO Process	GO:0048856	Anatomical structure development
Cold stress	T459_02231	4072.A0A1U8H694	GO Process	GO:0050789	Regulation of biological process
Cold stress	T459_02231	4072.A0A1U8H694	GO Process	GO:0060255	Regulation of macromolecule metabolic process
Cold stress	T459_02231	4072.A0A1U8H694	GO Process	GO:0065007	Biological regulation
Cold stress	T459_02231	4072.A0A1U8H694	GO Process	GO:0071025	RNA surveillance
Cold stress	T459_02231	4072.A0A1U8H694	GO Process	GO:0071027	Nuclear RNA surveillance
Cold stress	T459_02231	4072.A0A1U8H694	GO Process	GO:0071028	Nuclear mRNA surveillance
Cold stress	T459_02231	4072.A0A1U8H694	GO Process	GO:0071051	Polyadenylation-dependent snoRNA 3-end processing
Cold stress	T459_02231	4072.A0A1U8H694	GO Process	GO:0071704	Organic substance metabolic process
Cold stress	T459_02231	4072.A0A1U8H694	GO Process	GO:0071840	Cellular component organization or biogenesis
Cold stress	T459_02231	4072.A0A1U8H694	GO Process	GO:0090304	Nucleic acid metabolic process
Cold stress	T459_02231	4072.A0A1U8H694	GO Process	GO:0090305	Nucleic acid phosphodiester bond hydrolysis
Cold stress	T459_02231	4072.A0A1U8H694	GO Process	GO:0090351	Seedling development
Cold stress	T459_02231	4072.A0A1U8H694	GO Process	GO:1901360	Organic cyclic compound metabolic process
Cold stress	T459_02231	4072.A0A1U8H694	GO Process	GO:1901361	Organic cyclic compound catabolic process
Cold stress	T459_02231	4072.A0A1U8H694	GO Process	GO:1901575	Organic substance catabolic process
Cold stress	T459_03229	4072.A0A1U8F0K6	GO Process	GO:0008152	Metabolic process
Cold stress	T459_03229	4072.A0A1U8F0K6	GO Process	GO:0009987	Cellular process
Cold stress	T459_03229	4072.A0A1U8F0K6	GO Process	GO:0044237	Cellular metabolic process
Cold stress	T459_03229	4072.A0A1U8F0K6	GO Process	GO:0044238	Primary metabolic process
Cold stress	T459_03229	4072.A0A1U8F0K6	GO Process	GO:0071704	Organic substance metabolic process
Cold stress	T459_03756	4072.A0A1U8EQI3	GO Process	GO:0006518	Peptide metabolic process
Cold stress	T459_03756	4072.A0A1U8EQI3	GO Process	GO:0006575	Cellular modified amino acid metabolic process
Cold stress	T459_03756	4072.A0A1U8EQI3	GO Process	GO:0006749	Glutathione metabolic process
Cold stress	T459_03756	4072.A0A1U8EQI3	GO Process	GO:0006751	Glutathione catabolic process
Cold stress	T459_03756	4072.A0A1U8EQI3	GO Process	GO:0006790	Sulfur compound metabolic process
Cold stress	T459_03756	4072.A0A1U8EQI3	GO Process	GO:0006807	Nitrogen compound metabolic process
Cold stress	T459_03756	4072.A0A1U8EQI3	GO Process	GO:0008152	Metabolic process
Cold stress	T459_03756	4072.A0A1U8EQI3	GO Process	GO:0009056	Catabolic process
Cold stress	T459_03756	4072.A0A1U8EQI3	GO Process	GO:0009987	Cellular process
Cold stress	T459_03756	4072.A0A1U8EQI3	GO Process	GO:0010035	Response to inorganic substance
Cold stress	T459_03756	4072.A0A1U8EQI3	GO Process	GO:0010038	Response to metal ion
Cold stress	T459_03756	4072.A0A1U8EQI3	GO Process	GO:0010288	Response to lead ion
Cold stress	T459_03756	4072.A0A1U8EQI3	GO Process	GO:0034641	Cellular nitrogen compound metabolic process
Cold stress	T459_03756	4072.A0A1U8EQI3	GO Process	GO:0042219	Cellular modified amino acid catabolic process
Cold stress	T459_03756	4072.A0A1U8EQI3	GO Process	GO:0042221	Response to chemical
Cold stress	T459_03756	4072.A0A1U8EQI3	GO Process	GO:0043171	Peptide catabolic process
Cold stress	T459_03756	4072.A0A1U8EQI3	GO Process	GO:0043603	Cellular amide metabolic process
Cold stress	T459_03756	4072.A0A1U8EQI3	GO Process	GO:0044237	Cellular metabolic process
Cold stress	T459_03756	4072.A0A1U8EQI3	GO Process	GO:0044248	Cellular catabolic process
Cold stress	T459_03756	4072.A0A1U8EQI3	GO Process	GO:0044273	Sulfur compound catabolic process
Cold stress	T459_03756	4072.A0A1U8EQI3	GO Process	GO:0046686	Response to cadmium ion
Cold stress	T459_03756	4072.A0A1U8EQI3	GO Process	GO:0050896	Response to stimulus
Cold stress	T459_03756	4072.A0A1U8EQI3	GO Process	GO:0071704	Organic substance metabolic process
Cold stress	T459_03756	4072.A0A1U8EQI3	GO Process	GO:1901564	Organonitrogen compound metabolic process
Cold stress	T459_03756	4072.A0A1U8EQI3	GO Process	GO:1901565	Organonitrogen compound catabolic process
Cold stress	T459_03756	4072.A0A1U8EQI3	GO Process	GO:1901575	Organic substance catabolic process
Cold stress	T459_05146	4072.A0A2G3A767	GO Process	GO:0007049	Cell cycle
Cold stress	T459_05146	4072.A0A2G3A767	GO Process	GO:0007275	Multicellular organism development
Cold stress	T459_05146	4072.A0A2G3A767	GO Process	GO:0009653	Anatomical structure morphogenesis
Cold stress	T459_05146	4072.A0A2G3A767	GO Process	GO:0009719	Response to endogenous stimulus
Cold stress	T459_05146	4072.A0A2G3A767	GO Process	GO:0009725	Response to hormone
Cold stress	T459_05146	4072.A0A2G3A767	GO Process	GO:0009733	Response to auxin
Cold stress	T459_05146	4072.A0A2G3A767	GO Process	GO:0009791	Post-embryonic development
Cold stress	T459_05146	4072.A0A2G3A767	GO Process	GO:0009987	Cellular process
Cold stress	T459_05146	4072.A0A2G3A767	GO Process	GO:0010015	Root morphogenesis
Cold stress	T459_05146	4072.A0A2G3A767	GO Process	GO:0010033	Response to organic substance
Cold stress	T459_05146	4072.A0A2G3A767	GO Process	GO:0010101	Post-embryonic root morphogenesis
Cold stress	T459_05146	4072.A0A2G3A767	GO Process	GO:0010102	Lateral root morphogenesis
Cold stress	T459_05146	4072.A0A2G3A767	GO Process	GO:0022622	Root system development
Cold stress	T459_05146	4072.A0A2G3A767	GO Process	GO:0032501	Multicellular organismal process
Cold stress	T459_05146	4072.A0A2G3A767	GO Process	GO:0032502	Developmental process
Cold stress	T459_05146	4072.A0A2G3A767	GO Process	GO:0042221	Response to chemical
Cold stress	T459_05146	4072.A0A2G3A767	GO Process	GO:0048364	Root development
Cold stress	T459_05146	4072.A0A2G3A767	GO Process	GO:0048527	Lateral root development
Cold stress	T459_05146	4072.A0A2G3A767	GO Process	GO:0048528	Post-embryonic root development
Cold stress	T459_05146	4072.A0A2G3A767	GO Process	GO:0048731	System development
Cold stress	T459_05146	4072.A0A2G3A767	GO Process	GO:0048856	Anatomical structure development
Cold stress	T459_05146	4072.A0A2G3A767	GO Process	GO:0050896	Response to stimulus
Cold stress	T459_05146	4072.A0A2G3A767	GO Process	GO:0051301	Cell division
Cold stress	T459_05146	4072.A0A2G3A767	GO Process	GO:0090696	Post-embryonic plant organ development
Cold stress	T459_05146	4072.A0A2G3A767	GO Process	GO:0090697	Post-embryonic plant organ morphogenesis
Cold stress	T459_05146	4072.A0A2G3A767	GO Process	GO:0090698	Post-embryonic plant morphogenesis
Cold stress	T459_05146	4072.A0A2G3A767	GO Process	GO:0099402	Plant organ development
Cold stress	T459_05146	4072.A0A2G3A767	GO Process	GO:1905392	Plant organ morphogenesis
Cold stress	T459_06059	4072.A0A1U8FNB7	GO Process	GO:0006139	Nucleobase-containing compound metabolic process
Cold stress	T459_06059	4072.A0A1U8FNB7	GO Process	GO:0006351	Transcription, DNA-templated
Cold stress	T459_06059	4072.A0A1U8FNB7	GO Process	GO:0006353	DNA-templated transcription, termination
Cold stress	T459_06059	4072.A0A1U8FNB7	GO Process	GO:0006366	Transcription by RNA polymerase II
Cold stress	T459_06059	4072.A0A1U8FNB7	GO Process	GO:0006369	Termination of RNA polymerase II transcription
Cold stress	T459_06059	4072.A0A1U8FNB7	GO Process	GO:0006725	Cellular aromatic compound metabolic process
Cold stress	T459_06059	4072.A0A1U8FNB7	GO Process	GO:0006807	Nitrogen compound metabolic process
Cold stress	T459_06059	4072.A0A1U8FNB7	GO Process	GO:0008152	Metabolic process
Cold stress	T459_06059	4072.A0A1U8FNB7	GO Process	GO:0009058	Biosynthetic process
Cold stress	T459_06059	4072.A0A1U8FNB7	GO Process	GO:0009059	Macromolecule biosynthetic process
Cold stress	T459_06059	4072.A0A1U8FNB7	GO Process	GO:0009987	Cellular process
Cold stress	T459_06059	4072.A0A1U8FNB7	GO Process	GO:0010467	Gene expression
Cold stress	T459_06059	4072.A0A1U8FNB7	GO Process	GO:0016070	RNA metabolic process
Cold stress	T459_06059	4072.A0A1U8FNB7	GO Process	GO:0018130	Heterocycle biosynthetic process
Cold stress	T459_06059	4072.A0A1U8FNB7	GO Process	GO:0019438	Aromatic compound biosynthetic process
Cold stress	T459_06059	4072.A0A1U8FNB7	GO Process	GO:0032774	RNA biosynthetic process
Cold stress	T459_06059	4072.A0A1U8FNB7	GO Process	GO:0034641	Cellular nitrogen compound metabolic process
Cold stress	T459_06059	4072.A0A1U8FNB7	GO Process	GO:0034654	Nucleobase-containing compound biosynthetic process
Cold stress	T459_06059	4072.A0A1U8FNB7	GO Process	GO:0043170	Macromolecule metabolic process
Cold stress	T459_06059	4072.A0A1U8FNB7	GO Process	GO:0044237	Cellular metabolic process
Cold stress	T459_06059	4072.A0A1U8FNB7	GO Process	GO:0044238	Primary metabolic process
Cold stress	T459_06059	4072.A0A1U8FNB7	GO Process	GO:0044249	Cellular biosynthetic process
Cold stress	T459_06059	4072.A0A1U8FNB7	GO Process	GO:0044271	Cellular nitrogen compound biosynthetic process
Cold stress	T459_06059	4072.A0A1U8FNB7	GO Process	GO:0046483	Heterocycle metabolic process
Cold stress	T459_06059	4072.A0A1U8FNB7	GO Process	GO:0071704	Organic substance metabolic process
Cold stress	T459_06059	4072.A0A1U8FNB7	GO Process	GO:0090304	Nucleic acid metabolic process
Cold stress	T459_06059	4072.A0A1U8FNB7	GO Process	GO:0097659	Nucleic acid-templated transcription
Cold stress	T459_06059	4072.A0A1U8FNB7	GO Process	GO:1901360	Organic cyclic compound metabolic process
Cold stress	T459_06059	4072.A0A1U8FNB7	GO Process	GO:1901362	Organic cyclic compound biosynthetic process
Cold stress	T459_06059	4072.A0A1U8FNB7	GO Process	GO:1901576	Organic substance biosynthetic process
Cold stress	T459_06183	4072.A0A1U8FMB2	GO Process	GO:0006066	Alcohol metabolic process
Cold stress	T459_06183	4072.A0A1U8FMB2	GO Process	GO:0006082	Organic acid metabolic process
Cold stress	T459_06183	4072.A0A1U8FMB2	GO Process	GO:0006091	Generation of precursor metabolites and energy
Cold stress	T459_06183	4072.A0A1U8FMB2	GO Process	GO:0006099	Tricarboxylic acid cycle
Cold stress	T459_06183	4072.A0A1U8FMB2	GO Process	GO:0006102	Isocitrate metabolic process
Cold stress	T459_06183	4072.A0A1U8FMB2	GO Process	GO:0008152	Metabolic process
Cold stress	T459_06183	4072.A0A1U8FMB2	GO Process	GO:0009060	Aerobic respiration
Cold stress	T459_06183	4072.A0A1U8FMB2	GO Process	GO:0009987	Cellular process
Cold stress	T459_06183	4072.A0A1U8FMB2	GO Process	GO:0015980	Energy derivation by oxidation of organic compounds
Cold stress	T459_06183	4072.A0A1U8FMB2	GO Process	GO:0019752	Carboxylic acid metabolic process
Cold stress	T459_06183	4072.A0A1U8FMB2	GO Process	GO:0043436	Oxoacid metabolic process
Cold stress	T459_06183	4072.A0A1U8FMB2	GO Process	GO:0044237	Cellular metabolic process
Cold stress	T459_06183	4072.A0A1U8FMB2	GO Process	GO:0044238	Primary metabolic process
Cold stress	T459_06183	4072.A0A1U8FMB2	GO Process	GO:0044281	Small molecule metabolic process
Cold stress	T459_06183	4072.A0A1U8FMB2	GO Process	GO:0045333	Cellular respiration
Cold stress	T459_06183	4072.A0A1U8FMB2	GO Process	GO:0071704	Organic substance metabolic process
Cold stress	T459_06183	4072.A0A1U8FMB2	GO Process	GO:0072350	Tricarboxylic acid metabolic process
Cold stress	T459_06183	4072.A0A1U8FMB2	GO Process	GO:1901615	Organic hydroxy compound metabolic process
Cold stress	T459_06183	4072.A0A1U8FMB2	GO Process	GO:1902652	Secondary alcohol metabolic process
Cold stress	T459_07059	4072.A0A2G3ACH2	GO Process	GO:0008152	Metabolic process
Cold stress	T459_07059	4072.A0A2G3ACH2	GO Process	GO:0009987	Cellular process
Cold stress	T459_07059	4072.A0A2G3ACH2	GO Process	GO:0044237	Cellular metabolic process
Cold stress	T459_07059	4072.A0A2G3ACH2	GO Process	GO:0044238	Primary metabolic process
Cold stress	T459_07059	4072.A0A2G3ACH2	GO Process	GO:0071704	Organic substance metabolic process
Cold stress	T459_07645	4072.A0A2G2ZU88	GO Process	GO:0008152	Metabolic process
Cold stress	T459_07645	4072.A0A2G2ZU88	GO Process	GO:0032259	Methylation
Cold stress	T459_08211	4072.A0A2G2ZVW0	GO Process	GO:0000724	Double-strand break repair via homologous recombination
Cold stress	T459_08211	4072.A0A2G2ZVW0	GO Process	GO:0000725	Recombinational repair
Cold stress	T459_08211	4072.A0A2G2ZVW0	GO Process	GO:0006139	Nucleobase-containing compound metabolic process
Cold stress	T459_08211	4072.A0A2G2ZVW0	GO Process	GO:0006259	DNA metabolic process
Cold stress	T459_08211	4072.A0A2G2ZVW0	GO Process	GO:0006281	DNA repair
Cold stress	T459_08211	4072.A0A2G2ZVW0	GO Process	GO:0006302	Double-strand break repair
Cold stress	T459_08211	4072.A0A2G2ZVW0	GO Process	GO:0006310	DNA recombination
Cold stress	T459_08211	4072.A0A2G2ZVW0	GO Process	GO:0006325	Chromatin organization
Cold stress	T459_08211	4072.A0A2G2ZVW0	GO Process	GO:0006334	Nucleosome assembly
Cold stress	T459_08211	4072.A0A2G2ZVW0	GO Process	GO:0006338	Chromatin remodeling
Cold stress	T459_08211	4072.A0A2G2ZVW0	GO Process	GO:0006725	Cellular aromatic compound metabolic process
Cold stress	T459_08211	4072.A0A2G2ZVW0	GO Process	GO:0006807	Nitrogen compound metabolic process
Cold stress	T459_08211	4072.A0A2G2ZVW0	GO Process	GO:0006950	Response to stress
Cold stress	T459_08211	4072.A0A2G2ZVW0	GO Process	GO:0006974	Cellular response to DNA damage stimulus
Cold stress	T459_08211	4072.A0A2G2ZVW0	GO Process	GO:0006996	Organelle organization
Cold stress	T459_08211	4072.A0A2G2ZVW0	GO Process	GO:0008152	Metabolic process
Cold stress	T459_08211	4072.A0A2G2ZVW0	GO Process	GO:0009987	Cellular process
Cold stress	T459_08211	4072.A0A2G2ZVW0	GO Process	GO:0016043	Cellular component organization
Cold stress	T459_08211	4072.A0A2G2ZVW0	GO Process	GO:0022607	Cellular component assembly
Cold stress	T459_08211	4072.A0A2G2ZVW0	GO Process	GO:0031497	Chromatin assembly
Cold stress	T459_08211	4072.A0A2G2ZVW0	GO Process	GO:0033554	Cellular response to stress
Cold stress	T459_08211	4072.A0A2G2ZVW0	GO Process	GO:0034641	Cellular nitrogen compound metabolic process
Cold stress	T459_08211	4072.A0A2G2ZVW0	GO Process	GO:0034728	Nucleosome organization
Cold stress	T459_08211	4072.A0A2G2ZVW0	GO Process	GO:0043170	Macromolecule metabolic process
Cold stress	T459_08211	4072.A0A2G2ZVW0	GO Process	GO:0043933	Protein-containing complex organization
Cold stress	T459_08211	4072.A0A2G2ZVW0	GO Process	GO:0044085	Cellular component biogenesis
Cold stress	T459_08211	4072.A0A2G2ZVW0	GO Process	GO:0044237	Cellular metabolic process
Cold stress	T459_08211	4072.A0A2G2ZVW0	GO Process	GO:0044238	Primary metabolic process
Cold stress	T459_08211	4072.A0A2G2ZVW0	GO Process	GO:0044260	Cellular macromolecule metabolic process
Cold stress	T459_08211	4072.A0A2G2ZVW0	GO Process	GO:0046483	Heterocycle metabolic process
Cold stress	T459_08211	4072.A0A2G2ZVW0	GO Process	GO:0050896	Response to stimulus
Cold stress	T459_08211	4072.A0A2G2ZVW0	GO Process	GO:0051276	Chromosome organization
Cold stress	T459_08211	4072.A0A2G2ZVW0	GO Process	GO:0051716	Cellular response to stimulus
Cold stress	T459_08211	4072.A0A2G2ZVW0	GO Process	GO:0065003	Protein-containing complex assembly
Cold stress	T459_08211	4072.A0A2G2ZVW0	GO Process	GO:0065004	protein-DNA complex assembly
Cold stress	T459_08211	4072.A0A2G2ZVW0	GO Process	GO:0071704	Organic substance metabolic process
Cold stress	T459_08211	4072.A0A2G2ZVW0	GO Process	GO:0071824	protein-DNA complex subunit organization
Cold stress	T459_08211	4072.A0A2G2ZVW0	GO Process	GO:0071840	Cellular component organization or biogenesis
Cold stress	T459_08211	4072.A0A2G2ZVW0	GO Process	GO:0090304	Nucleic acid metabolic process
Cold stress	T459_08211	4072.A0A2G2ZVW0	GO Process	GO:1901360	Organic cyclic compound metabolic process
Cold stress	T459_09878	4072.A0A2G3A0L1	GO Process	GO:0006082	Organic acid metabolic process
Cold stress	T459_09878	4072.A0A2G3A0L1	GO Process	GO:0006520	Cellular amino acid metabolic process
Cold stress	T459_09878	4072.A0A2G3A0L1	GO Process	GO:0006725	Cellular aromatic compound metabolic process
Cold stress	T459_09878	4072.A0A2G3A0L1	GO Process	GO:0006807	Nitrogen compound metabolic process
Cold stress	T459_09878	4072.A0A2G3A0L1	GO Process	GO:0008152	Metabolic process
Cold stress	T459_09878	4072.A0A2G3A0L1	GO Process	GO:0009058	Biosynthetic process
Cold stress	T459_09878	4072.A0A2G3A0L1	GO Process	GO:0009987	Cellular process
Cold stress	T459_09878	4072.A0A2G3A0L1	GO Process	GO:0018958	Phenol-containing compound metabolic process
Cold stress	T459_09878	4072.A0A2G3A0L1	GO Process	GO:0019438	Aromatic compound biosynthetic process
Cold stress	T459_09878	4072.A0A2G3A0L1	GO Process	GO:0019752	Carboxylic acid metabolic process
Cold stress	T459_09878	4072.A0A2G3A0L1	GO Process	GO:0043436	Oxoacid metabolic process
Cold stress	T459_09878	4072.A0A2G3A0L1	GO Process	GO:0044237	Cellular metabolic process
Cold stress	T459_09878	4072.A0A2G3A0L1	GO Process	GO:0044238	Primary metabolic process
Cold stress	T459_09878	4072.A0A2G3A0L1	GO Process	GO:0044249	Cellular biosynthetic process
Cold stress	T459_09878	4072.A0A2G3A0L1	GO Process	GO:0044281	Small molecule metabolic process
Cold stress	T459_09878	4072.A0A2G3A0L1	GO Process	GO:0046189	Phenol-containing compound biosynthetic process
Cold stress	T459_09878	4072.A0A2G3A0L1	GO Process	GO:0071704	Organic substance metabolic process
Cold stress	T459_09878	4072.A0A2G3A0L1	GO Process	GO:1901160	Primary amino compound metabolic process
Cold stress	T459_09878	4072.A0A2G3A0L1	GO Process	GO:1901162	Primary amino compound biosynthetic process
Cold stress	T459_09878	4072.A0A2G3A0L1	GO Process	GO:1901360	Organic cyclic compound metabolic process
Cold stress	T459_09878	4072.A0A2G3A0L1	GO Process	GO:1901362	Organic cyclic compound biosynthetic process
Cold stress	T459_09878	4072.A0A2G3A0L1	GO Process	GO:1901564	Organonitrogen compound metabolic process
Cold stress	T459_09878	4072.A0A2G3A0L1	GO Process	GO:1901566	Organonitrogen compound biosynthetic process
Cold stress	T459_09878	4072.A0A2G3A0L1	GO Process	GO:1901576	Organic substance biosynthetic process
Cold stress	T459_09878	4072.A0A2G3A0L1	GO Process	GO:1901615	Organic hydroxy compound metabolic process
Cold stress	T459_09878	4072.A0A2G3A0L1	GO Process	GO:1901617	Organic hydroxy compound biosynthetic process
Cold stress	T459_10333	4072.A0A2G3A1W4	GO Process	GO:0006082	Organic acid metabolic process
Cold stress	T459_10333	4072.A0A2G3A1W4	GO Process	GO:0006629	Lipid metabolic process
Cold stress	T459_10333	4072.A0A2G3A1W4	GO Process	GO:0006631	Fatty acid metabolic process
Cold stress	T459_10333	4072.A0A2G3A1W4	GO Process	GO:0008152	Metabolic process
Cold stress	T459_10333	4072.A0A2G3A1W4	GO Process	GO:0009987	Cellular process
Cold stress	T459_10333	4072.A0A2G3A1W4	GO Process	GO:0019752	Carboxylic acid metabolic process
Cold stress	T459_10333	4072.A0A2G3A1W4	GO Process	GO:0032787	Monocarboxylic acid metabolic process
Cold stress	T459_10333	4072.A0A2G3A1W4	GO Process	GO:0043436	Oxoacid metabolic process
Cold stress	T459_10333	4072.A0A2G3A1W4	GO Process	GO:0044237	Cellular metabolic process
Cold stress	T459_10333	4072.A0A2G3A1W4	GO Process	GO:0044238	Primary metabolic process
Cold stress	T459_10333	4072.A0A2G3A1W4	GO Process	GO:0044255	Cellular lipid metabolic process
Cold stress	T459_10333	4072.A0A2G3A1W4	GO Process	GO:0044281	Small molecule metabolic process
Cold stress	T459_10333	4072.A0A2G3A1W4	GO Process	GO:0071704	Organic substance metabolic process
Cold stress	T459_10346	4072.A0A1U8EDB4	GO Process	GO:0006508	Proteolysis
Cold stress	T459_10346	4072.A0A1U8EDB4	GO Process	GO:0006807	Nitrogen compound metabolic process
Cold stress	T459_10346	4072.A0A1U8EDB4	GO Process	GO:0008152	Metabolic process
Cold stress	T459_10346	4072.A0A1U8EDB4	GO Process	GO:0010467	Gene expression
Cold stress	T459_10346	4072.A0A1U8EDB4	GO Process	GO:0016485	Protein processing
Cold stress	T459_10346	4072.A0A1U8EDB4	GO Process	GO:0016540	Protein autoprocessing
Cold stress	T459_10346	4072.A0A1U8EDB4	GO Process	GO:0019538	Protein metabolic process
Cold stress	T459_10346	4072.A0A1U8EDB4	GO Process	GO:0043170	Macromolecule metabolic process
Cold stress	T459_10346	4072.A0A1U8EDB4	GO Process	GO:0044238	Primary metabolic process
Cold stress	T459_10346	4072.A0A1U8EDB4	GO Process	GO:0051604	Protein maturation
Cold stress	T459_10346	4072.A0A1U8EDB4	GO Process	GO:0071704	Organic substance metabolic process
Cold stress	T459_10346	4072.A0A1U8EDB4	GO Process	GO:1901564	Organonitrogen compound metabolic process
Cold stress	T459_10919	4072.A0A1U8FU65	GO Process	GO:0008152	Metabolic process
Cold stress	T459_10919	4072.A0A1U8FU65	GO Process	GO:0009853	Photorespiration
Cold stress	T459_10919	4072.A0A1U8FU65	GO Process	GO:0009854	Oxidative photosynthetic carbon pathway
Cold stress	T459_10919	4072.A0A1U8FU65	GO Process	GO:0009987	Cellular process
Cold stress	T459_10919	4072.A0A1U8FU65	GO Process	GO:0043094	Cellular metabolic compound salvage
Cold stress	T459_10919	4072.A0A1U8FU65	GO Process	GO:0044237	Cellular metabolic process
Cold stress	T459_11597	4072.A0A2G2ZML9	GO Process	GO:0006355	Regulation of transcription, DNA-templated
Cold stress	T459_11597	4072.A0A2G2ZML9	GO Process	GO:0009889	Regulation of biosynthetic process
Cold stress	T459_11597	4072.A0A2G2ZML9	GO Process	GO:0010468	Regulation of gene expression
Cold stress	T459_11597	4072.A0A2G2ZML9	GO Process	GO:0010556	Regulation of macromolecule biosynthetic process
Cold stress	T459_11597	4072.A0A2G2ZML9	GO Process	GO:0019219	Regulation of nucleobase-containing compound metabolic process
Cold stress	T459_11597	4072.A0A2G2ZML9	GO Process	GO:0019222	Regulation of metabolic process
Cold stress	T459_11597	4072.A0A2G2ZML9	GO Process	GO:0031323	Regulation of cellular metabolic process
Cold stress	T459_11597	4072.A0A2G2ZML9	GO Process	GO:0031326	Regulation of cellular biosynthetic process
Cold stress	T459_11597	4072.A0A2G2ZML9	GO Process	GO:0050789	Regulation of biological process
Cold stress	T459_11597	4072.A0A2G2ZML9	GO Process	GO:0050794	Regulation of cellular process
Cold stress	T459_11597	4072.A0A2G2ZML9	GO Process	GO:0051171	Regulation of nitrogen compound metabolic process
Cold stress	T459_11597	4072.A0A2G2ZML9	GO Process	GO:0051252	Regulation of RNA metabolic process
Cold stress	T459_11597	4072.A0A2G2ZML9	GO Process	GO:0060255	Regulation of macromolecule metabolic process
Cold stress	T459_11597	4072.A0A2G2ZML9	GO Process	GO:0065007	Biological regulation
Cold stress	T459_11597	4072.A0A2G2ZML9	GO Process	GO:0080090	Regulation of primary metabolic process
Cold stress	T459_11597	4072.A0A2G2ZML9	GO Process	GO:1903506	Regulation of nucleic acid-templated transcription
Cold stress	T459_11597	4072.A0A2G2ZML9	GO Process	GO:2001141	Regulation of RNA biosynthetic process
Cold stress	T459_11773	4072.A0A2G2ZMV7	GO Process	GO:0006518	Peptide metabolic process
Cold stress	T459_11773	4072.A0A2G2ZMV7	GO Process	GO:0006575	Cellular modified amino acid metabolic process
Cold stress	T459_11773	4072.A0A2G2ZMV7	GO Process	GO:0006749	Glutathione metabolic process
Cold stress	T459_11773	4072.A0A2G2ZMV7	GO Process	GO:0006751	Glutathione catabolic process
Cold stress	T459_11773	4072.A0A2G2ZMV7	GO Process	GO:0006790	Sulfur compound metabolic process
Cold stress	T459_11773	4072.A0A2G2ZMV7	GO Process	GO:0006807	Nitrogen compound metabolic process
Cold stress	T459_11773	4072.A0A2G2ZMV7	GO Process	GO:0008152	Metabolic process
Cold stress	T459_11773	4072.A0A2G2ZMV7	GO Process	GO:0009056	Catabolic process
Cold stress	T459_11773	4072.A0A2G2ZMV7	GO Process	GO:0009987	Cellular process
Cold stress	T459_11773	4072.A0A2G2ZMV7	GO Process	GO:0034641	Cellular nitrogen compound metabolic process
Cold stress	T459_11773	4072.A0A2G2ZMV7	GO Process	GO:0042219	Cellular modified amino acid catabolic process
Cold stress	T459_11773	4072.A0A2G2ZMV7	GO Process	GO:0043171	Peptide catabolic process
Cold stress	T459_11773	4072.A0A2G2ZMV7	GO Process	GO:0043603	Cellular amide metabolic process
Cold stress	T459_11773	4072.A0A2G2ZMV7	GO Process	GO:0044237	Cellular metabolic process
Cold stress	T459_11773	4072.A0A2G2ZMV7	GO Process	GO:0044248	Cellular catabolic process
Cold stress	T459_11773	4072.A0A2G2ZMV7	GO Process	GO:0044273	Sulfur compound catabolic process
Cold stress	T459_11773	4072.A0A2G2ZMV7	GO Process	GO:0071704	Organic substance metabolic process
Cold stress	T459_11773	4072.A0A2G2ZMV7	GO Process	GO:1901564	Organonitrogen compound metabolic process
Cold stress	T459_11773	4072.A0A2G2ZMV7	GO Process	GO:1901565	Organonitrogen compound catabolic process
Cold stress	T459_11773	4072.A0A2G2ZMV7	GO Process	GO:1901575	Organic substance catabolic process
Cold stress	T459_11789	4072.A0A1U8GGB0	GO Process	GO:0006082	Organic acid metabolic process
Cold stress	T459_11789	4072.A0A1U8GGB0	GO Process	GO:0006520	Cellular amino acid metabolic process
Cold stress	T459_11789	4072.A0A1U8GGB0	GO Process	GO:0006725	Cellular aromatic compound metabolic process
Cold stress	T459_11789	4072.A0A1U8GGB0	GO Process	GO:0006807	Nitrogen compound metabolic process
Cold stress	T459_11789	4072.A0A1U8GGB0	GO Process	GO:0008152	Metabolic process
Cold stress	T459_11789	4072.A0A1U8GGB0	GO Process	GO:0009058	Biosynthetic process
Cold stress	T459_11789	4072.A0A1U8GGB0	GO Process	GO:0009987	Cellular process
Cold stress	T459_11789	4072.A0A1U8GGB0	GO Process	GO:0018958	Phenol-containing compound metabolic process
Cold stress	T459_11789	4072.A0A1U8GGB0	GO Process	GO:0019438	Aromatic compound biosynthetic process
Cold stress	T459_11789	4072.A0A1U8GGB0	GO Process	GO:0019752	Carboxylic acid metabolic process
Cold stress	T459_11789	4072.A0A1U8GGB0	GO Process	GO:0043436	Oxoacid metabolic process
Cold stress	T459_11789	4072.A0A1U8GGB0	GO Process	GO:0044237	Cellular metabolic process
Cold stress	T459_11789	4072.A0A1U8GGB0	GO Process	GO:0044238	Primary metabolic process
Cold stress	T459_11789	4072.A0A1U8GGB0	GO Process	GO:0044249	Cellular biosynthetic process
Cold stress	T459_11789	4072.A0A1U8GGB0	GO Process	GO:0044281	Small molecule metabolic process
Cold stress	T459_11789	4072.A0A1U8GGB0	GO Process	GO:0046189	Phenol-containing compound biosynthetic process
Cold stress	T459_11789	4072.A0A1U8GGB0	GO Process	GO:0071704	Organic substance metabolic process
Cold stress	T459_11789	4072.A0A1U8GGB0	GO Process	GO:1901160	Primary amino compound metabolic process
Cold stress	T459_11789	4072.A0A1U8GGB0	GO Process	GO:1901162	Primary amino compound biosynthetic process
Cold stress	T459_11789	4072.A0A1U8GGB0	GO Process	GO:1901360	Organic cyclic compound metabolic process
Cold stress	T459_11789	4072.A0A1U8GGB0	GO Process	GO:1901362	Organic cyclic compound biosynthetic process
Cold stress	T459_11789	4072.A0A1U8GGB0	GO Process	GO:1901564	Organonitrogen compound metabolic process
Cold stress	T459_11789	4072.A0A1U8GGB0	GO Process	GO:1901566	Organonitrogen compound biosynthetic process
Cold stress	T459_11789	4072.A0A1U8GGB0	GO Process	GO:1901576	Organic substance biosynthetic process
Cold stress	T459_11789	4072.A0A1U8GGB0	GO Process	GO:1901615	Organic hydroxy compound metabolic process
Cold stress	T459_11789	4072.A0A1U8GGB0	GO Process	GO:1901617	Organic hydroxy compound biosynthetic process
Cold stress	CazAAT07	4072.A0A2G2ZNQ4	GO Process	GO:0006082	Organic acid metabolic process
Cold stress	CazAAT07	4072.A0A2G2ZNQ4	GO Process	GO:0006520	Cellular amino acid metabolic process
Cold stress	CazAAT07	4072.A0A2G2ZNQ4	GO Process	GO:0006725	Cellular aromatic compound metabolic process
Cold stress	CazAAT07	4072.A0A2G2ZNQ4	GO Process	GO:0006807	Nitrogen compound metabolic process
Cold stress	CazAAT07	4072.A0A2G2ZNQ4	GO Process	GO:0008152	Metabolic process
Cold stress	CazAAT07	4072.A0A2G2ZNQ4	GO Process	GO:0009058	Biosynthetic process
Cold stress	CazAAT07	4072.A0A2G2ZNQ4	GO Process	GO:0009987	Cellular process
Cold stress	CazAAT07	4072.A0A2G2ZNQ4	GO Process	GO:0019752	Carboxylic acid metabolic process
Cold stress	CazAAT07	4072.A0A2G2ZNQ4	GO Process	GO:0042180	Cellular ketone metabolic process
Cold stress	CazAAT07	4072.A0A2G2ZNQ4	GO Process	GO:0042537	Benzene-containing compound metabolic process
Cold stress	CazAAT07	4072.A0A2G2ZNQ4	GO Process	GO:0043436	Oxoacid metabolic process
Cold stress	CazAAT07	4072.A0A2G2ZNQ4	GO Process	GO:0044237	Cellular metabolic process
Cold stress	CazAAT07	4072.A0A2G2ZNQ4	GO Process	GO:0044238	Primary metabolic process
Cold stress	CazAAT07	4072.A0A2G2ZNQ4	GO Process	GO:0044281	Small molecule metabolic process
Cold stress	CazAAT07	4072.A0A2G2ZNQ4	GO Process	GO:0070189	Kynurenine metabolic process
Cold stress	CazAAT07	4072.A0A2G2ZNQ4	GO Process	GO:0071704	Organic substance metabolic process
Cold stress	CazAAT07	4072.A0A2G2ZNQ4	GO Process	GO:0097052	L-kynurenine metabolic process
Cold stress	CazAAT07	4072.A0A2G2ZNQ4	GO Process	GO:1901360	Organic cyclic compound metabolic process
Cold stress	CazAAT07	4072.A0A2G2ZNQ4	GO Process	GO:1901564	Organonitrogen compound metabolic process
Cold stress	CazAAT07	4072.A0A2G2ZNQ4	GO Process	GO:1901605	Alpha-amino acid metabolic process
Cold stress	T459_13030	4072.A0A1U8GBW5	GO Process	GO:0006355	Regulation of transcription, DNA-templated
Cold stress	T459_13030	4072.A0A1U8GBW5	GO Process	GO:0006357	Regulation of transcription by RNA polymerase II
Cold stress	T459_13030	4072.A0A1U8GBW5	GO Process	GO:0006476	Protein deacetylation
Cold stress	T459_13030	4072.A0A1U8GBW5	GO Process	GO:0006807	Nitrogen compound metabolic process
Cold stress	T459_13030	4072.A0A1U8GBW5	GO Process	GO:0006950	Response to stress
Cold stress	T459_13030	4072.A0A1U8GBW5	GO Process	GO:0008152	Metabolic process
Cold stress	T459_13030	4072.A0A1U8GBW5	GO Process	GO:0009266	Response to temperature stimulus
Cold stress	T459_13030	4072.A0A1U8GBW5	GO Process	GO:0009409	Response to cold
Cold stress	T459_13030	4072.A0A1U8GBW5	GO Process	GO:0009628	Response to abiotic stimulus
Cold stress	T459_13030	4072.A0A1U8GBW5	GO Process	GO:0009889	Regulation of biosynthetic process
Cold stress	T459_13030	4072.A0A1U8GBW5	GO Process	GO:0009890	Negative regulation of biosynthetic process
Cold stress	T459_13030	4072.A0A1U8GBW5	GO Process	GO:0009892	Negative regulation of metabolic process
Cold stress	T459_13030	4072.A0A1U8GBW5	GO Process	GO:0010468	Regulation of gene expression
Cold stress	T459_13030	4072.A0A1U8GBW5	GO Process	GO:0010556	Regulation of macromolecule biosynthetic process
Cold stress	T459_13030	4072.A0A1U8GBW5	GO Process	GO:0010558	Negative regulation of macromolecule biosynthetic process
Cold stress	T459_13030	4072.A0A1U8GBW5	GO Process	GO:0010605	Negative regulation of macromolecule metabolic process
Cold stress	T459_13030	4072.A0A1U8GBW5	GO Process	GO:0016570	Histone modification
Cold stress	T459_13030	4072.A0A1U8GBW5	GO Process	GO:0016575	Histone deacetylation
Cold stress	T459_13030	4072.A0A1U8GBW5	GO Process	GO:0019219	Regulation of nucleobase-containing compound metabolic process
Cold stress	T459_13030	4072.A0A1U8GBW5	GO Process	GO:0019222	Regulation of metabolic process
Cold stress	T459_13030	4072.A0A1U8GBW5	GO Process	GO:0019538	Protein metabolic process
Cold stress	T459_13030	4072.A0A1U8GBW5	GO Process	GO:0031323	Regulation of cellular metabolic process
Cold stress	T459_13030	4072.A0A1U8GBW5	GO Process	GO:0031324	Negative regulation of cellular metabolic process
Cold stress	T459_13030	4072.A0A1U8GBW5	GO Process	GO:0031326	Regulation of cellular biosynthetic process
Cold stress	T459_13030	4072.A0A1U8GBW5	GO Process	GO:0031327	Negative regulation of cellular biosynthetic process
Cold stress	T459_13030	4072.A0A1U8GBW5	GO Process	GO:0035601	Protein deacylation
Cold stress	T459_13030	4072.A0A1U8GBW5	GO Process	GO:0036211	Protein modification process
Cold stress	T459_13030	4072.A0A1U8GBW5	GO Process	GO:0043170	Macromolecule metabolic process
Cold stress	T459_13030	4072.A0A1U8GBW5	GO Process	GO:0043412	Macromolecule modification
Cold stress	T459_13030	4072.A0A1U8GBW5	GO Process	GO:0044238	Primary metabolic process
Cold stress	T459_13030	4072.A0A1U8GBW5	GO Process	GO:0045892	Negative regulation of transcription, DNA-templated
Cold stress	T459_13030	4072.A0A1U8GBW5	GO Process	GO:0045934	Negative regulation of nucleobase-containing compound metabolic process
Cold stress	T459_13030	4072.A0A1U8GBW5	GO Process	GO:0048519	Negative regulation of biological process
Cold stress	T459_13030	4072.A0A1U8GBW5	GO Process	GO:0048523	Negative regulation of cellular process
Cold stress	T459_13030	4072.A0A1U8GBW5	GO Process	GO:0050789	Regulation of biological process
Cold stress	T459_13030	4072.A0A1U8GBW5	GO Process	GO:0050794	Regulation of cellular process
Cold stress	T459_13030	4072.A0A1U8GBW5	GO Process	GO:0050896	Response to stimulus
Cold stress	T459_13030	4072.A0A1U8GBW5	GO Process	GO:0051171	Regulation of nitrogen compound metabolic process
Cold stress	T459_13030	4072.A0A1U8GBW5	GO Process	GO:0051172	Negative regulation of nitrogen compound metabolic process
Cold stress	T459_13030	4072.A0A1U8GBW5	GO Process	GO:0051252	Regulation of RNA metabolic process
Cold stress	T459_13030	4072.A0A1U8GBW5	GO Process	GO:0051253	Negative regulation of RNA metabolic process
Cold stress	T459_13030	4072.A0A1U8GBW5	GO Process	GO:0060255	Regulation of macromolecule metabolic process
Cold stress	T459_13030	4072.A0A1U8GBW5	GO Process	GO:0065007	Biological regulation
Cold stress	T459_13030	4072.A0A1U8GBW5	GO Process	GO:0071704	Organic substance metabolic process
Cold stress	T459_13030	4072.A0A1U8GBW5	GO Process	GO:0080090	Regulation of primary metabolic process
Cold stress	T459_13030	4072.A0A1U8GBW5	GO Process	GO:0098732	Macromolecule deacylation
Cold stress	T459_13030	4072.A0A1U8GBW5	GO Process	GO:1901564	Organonitrogen compound metabolic process
Cold stress	T459_13030	4072.A0A1U8GBW5	GO Process	GO:1902679	Negative regulation of RNA biosynthetic process
Cold stress	T459_13030	4072.A0A1U8GBW5	GO Process	GO:1903506	Regulation of nucleic acid-templated transcription
Cold stress	T459_13030	4072.A0A1U8GBW5	GO Process	GO:1903507	Negative regulation of nucleic acid-templated transcription
Cold stress	T459_13030	4072.A0A1U8GBW5	GO Process	GO:2001141	Regulation of RNA biosynthetic process
Cold stress	T459_13138	4072.A0A1U8GKT6	GO Process	GO:0003333	Amino acid transmembrane transport
Cold stress	T459_13138	4072.A0A1U8GKT6	GO Process	GO:0006810	Transport
Cold stress	T459_13138	4072.A0A1U8GKT6	GO Process	GO:0006865	Amino acid transport
Cold stress	T459_13138	4072.A0A1U8GKT6	GO Process	GO:0009987	Cellular process
Cold stress	T459_13138	4072.A0A1U8GKT6	GO Process	GO:0015849	Organic acid transport
Cold stress	T459_13138	4072.A0A1U8GKT6	GO Process	GO:0051179	Localization
Cold stress	T459_13138	4072.A0A1U8GKT6	GO Process	GO:0051234	Establishment of localization
Cold stress	T459_13138	4072.A0A1U8GKT6	GO Process	GO:0055085	Transmembrane transport
Cold stress	T459_13138	4072.A0A1U8GKT6	GO Process	GO:0071702	Organic substance transport
Cold stress	T459_13138	4072.A0A1U8GKT6	GO Process	GO:0071705	Nitrogen compound transport
Cold stress	T459_13138	4072.A0A1U8GKT6	GO Process	GO:1903825	Organic acid transmembrane transport
Cold stress	T459_13138	4072.A0A1U8GKT6	GO Process	GO:1905039	Carboxylic acid transmembrane transport
Cold stress	T459_13446	4072.A0A2G2ZSS3	GO Process	GO:0006457	Protein folding
Cold stress	T459_13446	4072.A0A2G2ZSS3	GO Process	GO:0006605	Protein targeting
Cold stress	T459_13446	4072.A0A2G2ZSS3	GO Process	GO:0006626	Protein targeting to mitochondrion
Cold stress	T459_13446	4072.A0A2G2ZSS3	GO Process	GO:0006810	Transport
Cold stress	T459_13446	4072.A0A2G2ZSS3	GO Process	GO:0006839	Mitochondrial transport
Cold stress	T459_13446	4072.A0A2G2ZSS3	GO Process	GO:0006886	Intracellular protein transport
Cold stress	T459_13446	4072.A0A2G2ZSS3	GO Process	GO:0006996	Organelle organization
Cold stress	T459_13446	4072.A0A2G2ZSS3	GO Process	GO:0007005	Mitochondrion organization
Cold stress	T459_13446	4072.A0A2G2ZSS3	GO Process	GO:0008104	Protein localization
Cold stress	T459_13446	4072.A0A2G2ZSS3	GO Process	GO:0009987	Cellular process
Cold stress	T459_13446	4072.A0A2G2ZSS3	GO Process	GO:0015031	Protein transport
Cold stress	T459_13446	4072.A0A2G2ZSS3	GO Process	GO:0016043	Cellular component organization
Cold stress	T459_13446	4072.A0A2G2ZSS3	GO Process	GO:0030150	Protein import into mitochondrial matrix
Cold stress	T459_13446	4072.A0A2G2ZSS3	GO Process	GO:0031647	Regulation of protein stability
Cold stress	T459_13446	4072.A0A2G2ZSS3	GO Process	GO:0033036	Macromolecule localization
Cold stress	T459_13446	4072.A0A2G2ZSS3	GO Process	GO:0033365	Protein localization to organelle
Cold stress	T459_13446	4072.A0A2G2ZSS3	GO Process	GO:0044743	Protein transmembrane import into intracellular organelle
Cold stress	T459_13446	4072.A0A2G2ZSS3	GO Process	GO:0045184	Establishment of protein localization
Cold stress	T459_13446	4072.A0A2G2ZSS3	GO Process	GO:0046907	Intracellular transport
Cold stress	T459_13446	4072.A0A2G2ZSS3	GO Process	GO:0050821	Protein stabilization
Cold stress	T459_13446	4072.A0A2G2ZSS3	GO Process	GO:0051179	Localization
Cold stress	T459_13446	4072.A0A2G2ZSS3	GO Process	GO:0051234	Establishment of localization
Cold stress	T459_13446	4072.A0A2G2ZSS3	GO Process	GO:0051641	Cellular localization
Cold stress	T459_13446	4072.A0A2G2ZSS3	GO Process	GO:0051649	Establishment of localization in cell
Cold stress	T459_13446	4072.A0A2G2ZSS3	GO Process	GO:0055085	Transmembrane transport
Cold stress	T459_13446	4072.A0A2G2ZSS3	GO Process	GO:0065002	Intracellular protein transmembrane transport
Cold stress	T459_13446	4072.A0A2G2ZSS3	GO Process	GO:0065007	Biological regulation
Cold stress	T459_13446	4072.A0A2G2ZSS3	GO Process	GO:0065008	Regulation of biological quality
Cold stress	T459_13446	4072.A0A2G2ZSS3	GO Process	GO:0070585	Protein localization to mitochondrion
Cold stress	T459_13446	4072.A0A2G2ZSS3	GO Process	GO:0070727	Cellular macromolecule localization
Cold stress	T459_13446	4072.A0A2G2ZSS3	GO Process	GO:0071702	Organic substance transport
Cold stress	T459_13446	4072.A0A2G2ZSS3	GO Process	GO:0071705	Nitrogen compound transport
Cold stress	T459_13446	4072.A0A2G2ZSS3	GO Process	GO:0071806	Protein transmembrane transport
Cold stress	T459_13446	4072.A0A2G2ZSS3	GO Process	GO:0071840	Cellular component organization or biogenesis
Cold stress	T459_13446	4072.A0A2G2ZSS3	GO Process	GO:0072594	Establishment of protein localization to organelle
Cold stress	T459_13446	4072.A0A2G2ZSS3	GO Process	GO:0072655	Establishment of protein localization to mitochondrion
Cold stress	T459_13446	4072.A0A2G2ZSS3	GO Process	GO:1990542	Mitochondrial transmembrane transport
Cold stress	T459_13527	4072.A0A1U8GA34	GO Process	GO:0006139	Nucleobase-containing compound metabolic process
Cold stress	T459_13527	4072.A0A1U8GA34	GO Process	GO:0006725	Cellular aromatic compound metabolic process
Cold stress	T459_13527	4072.A0A1U8GA34	GO Process	GO:0006807	Nitrogen compound metabolic process
Cold stress	T459_13527	4072.A0A1U8GA34	GO Process	GO:0008152	Metabolic process
Cold stress	T459_13527	4072.A0A1U8GA34	GO Process	GO:0009451	RNA modification
Cold stress	T459_13527	4072.A0A1U8GA34	GO Process	GO:0009987	Cellular process
Cold stress	T459_13527	4072.A0A1U8GA34	GO Process	GO:0016070	RNA metabolic process
Cold stress	T459_13527	4072.A0A1U8GA34	GO Process	GO:0034641	Cellular nitrogen compound metabolic process
Cold stress	T459_13527	4072.A0A1U8GA34	GO Process	GO:0043170	Macromolecule metabolic process
Cold stress	T459_13527	4072.A0A1U8GA34	GO Process	GO:0043412	Macromolecule modification
Cold stress	T459_13527	4072.A0A1U8GA34	GO Process	GO:0044237	Cellular metabolic process
Cold stress	T459_13527	4072.A0A1U8GA34	GO Process	GO:0044238	Primary metabolic process
Cold stress	T459_13527	4072.A0A1U8GA34	GO Process	GO:0046483	Heterocycle metabolic process
Cold stress	T459_13527	4072.A0A1U8GA34	GO Process	GO:0071704	Organic substance metabolic process
Cold stress	T459_13527	4072.A0A1U8GA34	GO Process	GO:0090304	Nucleic acid metabolic process
Cold stress	T459_13527	4072.A0A1U8GA34	GO Process	GO:1901360	Organic cyclic compound metabolic process
Cold stress	T459_15621	4072.A0A2G2ZKU5	GO Process	GO:0000003	Reproduction
Cold stress	T459_15621	4072.A0A2G2ZKU5	GO Process	GO:0001510	RNA methylation
Cold stress	T459_15621	4072.A0A2G2ZKU5	GO Process	GO:0003006	Developmental process involved in reproduction
Cold stress	T459_15621	4072.A0A2G2ZKU5	GO Process	GO:0006139	Nucleobase-containing compound metabolic process
Cold stress	T459_15621	4072.A0A2G2ZKU5	GO Process	GO:0006725	Cellular aromatic compound metabolic process
Cold stress	T459_15621	4072.A0A2G2ZKU5	GO Process	GO:0006807	Nitrogen compound metabolic process
Cold stress	T459_15621	4072.A0A2G2ZKU5	GO Process	GO:0007275	Multicellular organism development
Cold stress	T459_15621	4072.A0A2G2ZKU5	GO Process	GO:0008152	Metabolic process
Cold stress	T459_15621	4072.A0A2G2ZKU5	GO Process	GO:0009451	RNA modification
Cold stress	T459_15621	4072.A0A2G2ZKU5	GO Process	GO:0009790	Embryo development
Cold stress	T459_15621	4072.A0A2G2ZKU5	GO Process	GO:0009791	Post-embryonic development
Cold stress	T459_15621	4072.A0A2G2ZKU5	GO Process	GO:0009793	Embryo development ending in seed dormancy
Cold stress	T459_15621	4072.A0A2G2ZKU5	GO Process	GO:0009987	Cellular process
Cold stress	T459_15621	4072.A0A2G2ZKU5	GO Process	GO:0010154	Fruit development
Cold stress	T459_15621	4072.A0A2G2ZKU5	GO Process	GO:0016070	RNA metabolic process
Cold stress	T459_15621	4072.A0A2G2ZKU5	GO Process	GO:0016071	mRNA metabolic process
Cold stress	T459_15621	4072.A0A2G2ZKU5	GO Process	GO:0016556	mRNA modification
Cold stress	T459_15621	4072.A0A2G2ZKU5	GO Process	GO:0022414	Reproductive process
Cold stress	T459_15621	4072.A0A2G2ZKU5	GO Process	GO:0032259	Methylation
Cold stress	T459_15621	4072.A0A2G2ZKU5	GO Process	GO:0032501	Multicellular organismal process
Cold stress	T459_15621	4072.A0A2G2ZKU5	GO Process	GO:0032502	Developmental process
Cold stress	T459_15621	4072.A0A2G2ZKU5	GO Process	GO:0034641	Cellular nitrogen compound metabolic process
Cold stress	T459_15621	4072.A0A2G2ZKU5	GO Process	GO:0043170	Macromolecule metabolic process
Cold stress	T459_15621	4072.A0A2G2ZKU5	GO Process	GO:0043412	Macromolecule modification
Cold stress	T459_15621	4072.A0A2G2ZKU5	GO Process	GO:0043414	Macromolecule methylation
Cold stress	T459_15621	4072.A0A2G2ZKU5	GO Process	GO:0044237	Cellular metabolic process
Cold stress	T459_15621	4072.A0A2G2ZKU5	GO Process	GO:0044238	Primary metabolic process
Cold stress	T459_15621	4072.A0A2G2ZKU5	GO Process	GO:0044260	Cellular macromolecule metabolic process
Cold stress	T459_15621	4072.A0A2G2ZKU5	GO Process	GO:0046483	Heterocycle metabolic process
Cold stress	T459_15621	4072.A0A2G2ZKU5	GO Process	GO:0048316	Seed development
Cold stress	T459_15621	4072.A0A2G2ZKU5	GO Process	GO:0048608	Reproductive structure development
Cold stress	T459_15621	4072.A0A2G2ZKU5	GO Process	GO:0048731	System development
Cold stress	T459_15621	4072.A0A2G2ZKU5	GO Process	GO:0048856	Anatomical structure development
Cold stress	T459_15621	4072.A0A2G2ZKU5	GO Process	GO:0061458	Reproductive system development
Cold stress	T459_15621	4072.A0A2G2ZKU5	GO Process	GO:0071704	Organic substance metabolic process
Cold stress	T459_15621	4072.A0A2G2ZKU5	GO Process	GO:0080009	mRNA methylation
Cold stress	T459_15621	4072.A0A2G2ZKU5	GO Process	GO:0090304	Nucleic acid metabolic process
Cold stress	T459_15621	4072.A0A2G2ZKU5	GO Process	GO:1901360	Organic cyclic compound metabolic process
Cold stress	T459_15796	4072.A0A2G2Z708	GO Process	GO:0006355	Regulation of transcription, DNA-templated
Cold stress	T459_15796	4072.A0A2G2Z708	GO Process	GO:0009889	Regulation of biosynthetic process
Cold stress	T459_15796	4072.A0A2G2Z708	GO Process	GO:0010468	Regulation of gene expression
Cold stress	T459_15796	4072.A0A2G2Z708	GO Process	GO:0010556	Regulation of macromolecule biosynthetic process
Cold stress	T459_15796	4072.A0A2G2Z708	GO Process	GO:0019219	Regulation of nucleobase-containing compound metabolic process
Cold stress	T459_15796	4072.A0A2G2Z708	GO Process	GO:0019222	Regulation of metabolic process
Cold stress	T459_15796	4072.A0A2G2Z708	GO Process	GO:0031323	Regulation of cellular metabolic process
Cold stress	T459_15796	4072.A0A2G2Z708	GO Process	GO:0031326	Regulation of cellular biosynthetic process
Cold stress	T459_15796	4072.A0A2G2Z708	GO Process	GO:0050789	Regulation of biological process
Cold stress	T459_15796	4072.A0A2G2Z708	GO Process	GO:0050794	Regulation of cellular process
Cold stress	T459_15796	4072.A0A2G2Z708	GO Process	GO:0051171	Regulation of nitrogen compound metabolic process
Cold stress	T459_15796	4072.A0A2G2Z708	GO Process	GO:0051252	Regulation of RNA metabolic process
Cold stress	T459_15796	4072.A0A2G2Z708	GO Process	GO:0060255	Regulation of macromolecule metabolic process
Cold stress	T459_15796	4072.A0A2G2Z708	GO Process	GO:0065007	Biological regulation
Cold stress	T459_15796	4072.A0A2G2Z708	GO Process	GO:0080090	Regulation of primary metabolic process
Cold stress	T459_15796	4072.A0A2G2Z708	GO Process	GO:1903506	Regulation of nucleic acid-templated transcription
Cold stress	T459_15796	4072.A0A2G2Z708	GO Process	GO:2001141	Regulation of RNA biosynthetic process
Cold stress	T459_15984	4072.A0A2G2Z7F5	GO Process	GO:0006355	Regulation of transcription, DNA-templated
Cold stress	T459_15984	4072.A0A2G2Z7F5	GO Process	GO:0006357	Regulation of transcription by RNA polymerase II
Cold stress	T459_15984	4072.A0A2G2Z7F5	GO Process	GO:0009889	Regulation of biosynthetic process
Cold stress	T459_15984	4072.A0A2G2Z7F5	GO Process	GO:0009891	Positive regulation of biosynthetic process
Cold stress	T459_15984	4072.A0A2G2Z7F5	GO Process	GO:0009893	Positive regulation of metabolic process
Cold stress	T459_15984	4072.A0A2G2Z7F5	GO Process	GO:0010468	Regulation of gene expression
Cold stress	T459_15984	4072.A0A2G2Z7F5	GO Process	GO:0010556	Regulation of macromolecule biosynthetic process
Cold stress	T459_15984	4072.A0A2G2Z7F5	GO Process	GO:0010557	Positive regulation of macromolecule biosynthetic process
Cold stress	T459_15984	4072.A0A2G2Z7F5	GO Process	GO:0010604	Positive regulation of macromolecule metabolic process
Cold stress	T459_15984	4072.A0A2G2Z7F5	GO Process	GO:0019219	Regulation of nucleobase-containing compound metabolic process
Cold stress	T459_15984	4072.A0A2G2Z7F5	GO Process	GO:0019222	Regulation of metabolic process
Cold stress	T459_15984	4072.A0A2G2Z7F5	GO Process	GO:0031323	Regulation of cellular metabolic process
Cold stress	T459_15984	4072.A0A2G2Z7F5	GO Process	GO:0031325	Positive regulation of cellular metabolic process
Cold stress	T459_15984	4072.A0A2G2Z7F5	GO Process	GO:0031326	Regulation of cellular biosynthetic process
Cold stress	T459_15984	4072.A0A2G2Z7F5	GO Process	GO:0031328	Positive regulation of cellular biosynthetic process
Cold stress	T459_15984	4072.A0A2G2Z7F5	GO Process	GO:0045893	Positive regulation of transcription, DNA-templated
Cold stress	T459_15984	4072.A0A2G2Z7F5	GO Process	GO:0045935	Positive regulation of nucleobase-containing compound metabolic process
Cold stress	T459_15984	4072.A0A2G2Z7F5	GO Process	GO:0045944	Positive regulation of transcription by RNA polymerase II
Cold stress	T459_15984	4072.A0A2G2Z7F5	GO Process	GO:0048518	Positive regulation of biological process
Cold stress	T459_15984	4072.A0A2G2Z7F5	GO Process	GO:0048522	Positive regulation of cellular process
Cold stress	T459_15984	4072.A0A2G2Z7F5	GO Process	GO:0050789	Regulation of biological process
Cold stress	T459_15984	4072.A0A2G2Z7F5	GO Process	GO:0050794	Regulation of cellular process
Cold stress	T459_15984	4072.A0A2G2Z7F5	GO Process	GO:0051171	Regulation of nitrogen compound metabolic process
Cold stress	T459_15984	4072.A0A2G2Z7F5	GO Process	GO:0051173	Positive regulation of nitrogen compound metabolic process
Cold stress	T459_15984	4072.A0A2G2Z7F5	GO Process	GO:0051252	Regulation of RNA metabolic process
Cold stress	T459_15984	4072.A0A2G2Z7F5	GO Process	GO:0051254	Positive regulation of RNA metabolic process
Cold stress	T459_15984	4072.A0A2G2Z7F5	GO Process	GO:0060255	Regulation of macromolecule metabolic process
Cold stress	T459_15984	4072.A0A2G2Z7F5	GO Process	GO:0065007	Biological regulation
Cold stress	T459_15984	4072.A0A2G2Z7F5	GO Process	GO:0080090	Regulation of primary metabolic process
Cold stress	T459_15984	4072.A0A2G2Z7F5	GO Process	GO:1902680	Positive regulation of RNA biosynthetic process
Cold stress	T459_15984	4072.A0A2G2Z7F5	GO Process	GO:1903506	Regulation of nucleic acid-templated transcription
Cold stress	T459_15984	4072.A0A2G2Z7F5	GO Process	GO:1903508	Positive regulation of nucleic acid-templated transcription
Cold stress	T459_15984	4072.A0A2G2Z7F5	GO Process	GO:2001141	Regulation of RNA biosynthetic process
Cold stress	T459_17095	4072.A0A1U8H1N2	GO Process	GO:0009987	Cellular process
Cold stress	T459_17666	4072.A0A2G2ZCE1	GO Process	GO:0000160	Phosphorelay signal transduction system
Cold stress	T459_17666	4072.A0A2G2ZCE1	GO Process	GO:0007154	Cell communication
Cold stress	T459_17666	4072.A0A2G2ZCE1	GO Process	GO:0007165	Signal transduction
Cold stress	T459_17666	4072.A0A2G2ZCE1	GO Process	GO:0009719	Response to endogenous stimulus
Cold stress	T459_17666	4072.A0A2G2ZCE1	GO Process	GO:0009725	Response to hormone
Cold stress	T459_17666	4072.A0A2G2ZCE1	GO Process	GO:0009735	Response to cytokinin
Cold stress	T459_17666	4072.A0A2G2ZCE1	GO Process	GO:0009736	Cytokinin-activated signaling pathway
Cold stress	T459_17666	4072.A0A2G2ZCE1	GO Process	GO:0009755	Hormone-mediated signaling pathway
Cold stress	T459_17666	4072.A0A2G2ZCE1	GO Process	GO:0009987	Cellular process
Cold stress	T459_17666	4072.A0A2G2ZCE1	GO Process	GO:0010033	Response to organic substance
Cold stress	T459_17666	4072.A0A2G2ZCE1	GO Process	GO:0023052	Signaling
Cold stress	T459_17666	4072.A0A2G2ZCE1	GO Process	GO:0032870	Cellular response to hormone stimulus
Cold stress	T459_17666	4072.A0A2G2ZCE1	GO Process	GO:0035556	Intracellular signal transduction
Cold stress	T459_17666	4072.A0A2G2ZCE1	GO Process	GO:0042221	Response to chemical
Cold stress	T459_17666	4072.A0A2G2ZCE1	GO Process	GO:0048511	Rhythmic process
Cold stress	T459_17666	4072.A0A2G2ZCE1	GO Process	GO:0050789	Regulation of biological process
Cold stress	T459_17666	4072.A0A2G2ZCE1	GO Process	GO:0050794	Regulation of cellular process
Cold stress	T459_17666	4072.A0A2G2ZCE1	GO Process	GO:0050896	Response to stimulus
Cold stress	T459_17666	4072.A0A2G2ZCE1	GO Process	GO:0051716	Cellular response to stimulus
Cold stress	T459_17666	4072.A0A2G2ZCE1	GO Process	GO:0065007	Biological regulation
Cold stress	T459_17666	4072.A0A2G2ZCE1	GO Process	GO:0070887	Cellular response to chemical stimulus
Cold stress	T459_17666	4072.A0A2G2ZCE1	GO Process	GO:0071310	Cellular response to organic substance
Cold stress	T459_17666	4072.A0A2G2ZCE1	GO Process	GO:0071368	Cellular response to cytokinin stimulus
Cold stress	T459_17666	4072.A0A2G2ZCE1	GO Process	GO:0071495	Cellular response to endogenous stimulus
Cold stress	T459_18342	4072.A0A2G2ZE81	GO Process	GO:0002237	Response to molecule of bacterial origin
Cold stress	T459_18342	4072.A0A2G2ZE81	GO Process	GO:0002376	Immune system process
Cold stress	T459_18342	4072.A0A2G2ZE81	GO Process	GO:0002682	Regulation of immune system process
Cold stress	T459_18342	4072.A0A2G2ZE81	GO Process	GO:0002683	Negative regulation of immune system process
Cold stress	T459_18342	4072.A0A2G2ZE81	GO Process	GO:0002831	Regulation of response to biotic stimulus
Cold stress	T459_18342	4072.A0A2G2ZE81	GO Process	GO:0002832	Negative regulation of response to biotic stimulus
Cold stress	T459_18342	4072.A0A2G2ZE81	GO Process	GO:0006468	Protein phosphorylation
Cold stress	T459_18342	4072.A0A2G2ZE81	GO Process	GO:0006793	Phosphorus metabolic process
Cold stress	T459_18342	4072.A0A2G2ZE81	GO Process	GO:0006796	Phosphate-containing compound metabolic process
Cold stress	T459_18342	4072.A0A2G2ZE81	GO Process	GO:0006807	Nitrogen compound metabolic process
Cold stress	T459_18342	4072.A0A2G2ZE81	GO Process	GO:0006950	Response to stress
Cold stress	T459_18342	4072.A0A2G2ZE81	GO Process	GO:0006952	Defense response
Cold stress	T459_18342	4072.A0A2G2ZE81	GO Process	GO:0006955	Immune response
Cold stress	T459_18342	4072.A0A2G2ZE81	GO Process	GO:0008152	Metabolic process
Cold stress	T459_18342	4072.A0A2G2ZE81	GO Process	GO:0008219	Cell death
Cold stress	T459_18342	4072.A0A2G2ZE81	GO Process	GO:0009605	Response to external stimulus
Cold stress	T459_18342	4072.A0A2G2ZE81	GO Process	GO:0009607	Response to biotic stimulus
Cold stress	T459_18342	4072.A0A2G2ZE81	GO Process	GO:0009617	Response to bacterium
Cold stress	T459_18342	4072.A0A2G2ZE81	GO Process	GO:0009987	Cellular process
Cold stress	T459_18342	4072.A0A2G2ZE81	GO Process	GO:0010033	Response to organic substance
Cold stress	T459_18342	4072.A0A2G2ZE81	GO Process	GO:0010363	Regulation of plant-type hypersensitive response
Cold stress	T459_18342	4072.A0A2G2ZE81	GO Process	GO:0010941	Regulation of cell death
Cold stress	T459_18342	4072.A0A2G2ZE81	GO Process	GO:0012501	Programmed cell death
Cold stress	T459_18342	4072.A0A2G2ZE81	GO Process	GO:0016310	Phosphorylation
Cold stress	T459_18342	4072.A0A2G2ZE81	GO Process	GO:0019538	Protein metabolic process
Cold stress	T459_18342	4072.A0A2G2ZE81	GO Process	GO:0031347	Regulation of defense response
Cold stress	T459_18342	4072.A0A2G2ZE81	GO Process	GO:0031348	Negative regulation of defense response
Cold stress	T459_18342	4072.A0A2G2ZE81	GO Process	GO:0032101	Regulation of response to external stimulus
Cold stress	T459_18342	4072.A0A2G2ZE81	GO Process	GO:0032102	Negative regulation of response to external stimulus
Cold stress	T459_18342	4072.A0A2G2ZE81	GO Process	GO:0033554	Cellular response to stress
Cold stress	T459_18342	4072.A0A2G2ZE81	GO Process	GO:0034050	Programmed cell death induced by symbiont
Cold stress	T459_18342	4072.A0A2G2ZE81	GO Process	GO:0036211	Protein modification process
Cold stress	T459_18342	4072.A0A2G2ZE81	GO Process	GO:0042221	Response to chemical
Cold stress	T459_18342	4072.A0A2G2ZE81	GO Process	GO:0042742	Defense response to bacterium
Cold stress	T459_18342	4072.A0A2G2ZE81	GO Process	GO:0043067	Regulation of programmed cell death
Cold stress	T459_18342	4072.A0A2G2ZE81	GO Process	GO:0043069	Negative regulation of programmed cell death
Cold stress	T459_18342	4072.A0A2G2ZE81	GO Process	GO:0043170	Macromolecule metabolic process
Cold stress	T459_18342	4072.A0A2G2ZE81	GO Process	GO:0043207	Response to external biotic stimulus
Cold stress	T459_18342	4072.A0A2G2ZE81	GO Process	GO:0043412	Macromolecule modification
Cold stress	T459_18342	4072.A0A2G2ZE81	GO Process	GO:0043903	Regulation of biological process involved in symbiotic interaction
Cold stress	T459_18342	4072.A0A2G2ZE81	GO Process	GO:0044237	Cellular metabolic process
Cold stress	T459_18342	4072.A0A2G2ZE81	GO Process	GO:0044238	Primary metabolic process
Cold stress	T459_18342	4072.A0A2G2ZE81	GO Process	GO:0044403	Biological process involved in symbiotic interaction
Cold stress	T459_18342	4072.A0A2G2ZE81	GO Process	GO:0044419	Biological process involved in interspecies interaction between organisms
Cold stress	T459_18342	4072.A0A2G2ZE81	GO Process	GO:0045087	Innate immune response
Cold stress	T459_18342	4072.A0A2G2ZE81	GO Process	GO:0045088	Regulation of innate immune response
Cold stress	T459_18342	4072.A0A2G2ZE81	GO Process	GO:0045824	Negative regulation of innate immune response
Cold stress	T459_18342	4072.A0A2G2ZE81	GO Process	GO:0048519	Negative regulation of biological process
Cold stress	T459_18342	4072.A0A2G2ZE81	GO Process	GO:0048523	Negative regulation of cellular process
Cold stress	T459_18342	4072.A0A2G2ZE81	GO Process	GO:0048583	Regulation of response to stimulus
Cold stress	T459_18342	4072.A0A2G2ZE81	GO Process	GO:0048585	Negative regulation of response to stimulus
Cold stress	T459_18342	4072.A0A2G2ZE81	GO Process	GO:0050776	Regulation of immune response
Cold stress	T459_18342	4072.A0A2G2ZE81	GO Process	GO:0050777	Negative regulation of immune response
Cold stress	T459_18342	4072.A0A2G2ZE81	GO Process	GO:0050789	Regulation of biological process
Cold stress	T459_18342	4072.A0A2G2ZE81	GO Process	GO:0050794	Regulation of cellular process
Cold stress	T459_18342	4072.A0A2G2ZE81	GO Process	GO:0050896	Response to stimulus
Cold stress	T459_18342	4072.A0A2G2ZE81	GO Process	GO:0051702	Biological process involved in interaction with symbiont
Cold stress	T459_18342	4072.A0A2G2ZE81	GO Process	GO:0051707	Response to other organism
Cold stress	T459_18342	4072.A0A2G2ZE81	GO Process	GO:0051716	Cellular response to stimulus
Cold stress	T459_18342	4072.A0A2G2ZE81	GO Process	GO:0060548	Negative regulation of cell death
Cold stress	T459_18342	4072.A0A2G2ZE81	GO Process	GO:0065007	Biological regulation
Cold stress	T459_18342	4072.A0A2G2ZE81	GO Process	GO:0071704	Organic substance metabolic process
Cold stress	T459_18342	4072.A0A2G2ZE81	GO Process	GO:0080134	Regulation of response to stress
Cold stress	T459_18342	4072.A0A2G2ZE81	GO Process	GO:0080135	Regulation of cellular response to stress
Cold stress	T459_18342	4072.A0A2G2ZE81	GO Process	GO:0098542	Defense response to other organism
Cold stress	T459_18342	4072.A0A2G2ZE81	GO Process	GO:1901564	Organonitrogen compound metabolic process
Cold stress	T459_18366	4072.A0A1U8FIR1	GO Process	GO:0006996	Organelle organization
Cold stress	T459_18366	4072.A0A1U8FIR1	GO Process	GO:0009657	Plastid organization
Cold stress	T459_18366	4072.A0A1U8FIR1	GO Process	GO:0009658	Chloroplast organization
Cold stress	T459_18366	4072.A0A1U8FIR1	GO Process	GO:0009987	Cellular process
Cold stress	T459_18366	4072.A0A1U8FIR1	GO Process	GO:0010020	Chloroplast fission
Cold stress	T459_18366	4072.A0A1U8FIR1	GO Process	GO:0016043	Cellular component organization
Cold stress	T459_18366	4072.A0A1U8FIR1	GO Process	GO:0043572	Plastid fission
Cold stress	T459_18366	4072.A0A1U8FIR1	GO Process	GO:0048285	Organelle fission
Cold stress	T459_18366	4072.A0A1U8FIR1	GO Process	GO:0071840	Cellular component organization or biogenesis
Cold stress	T459_18366	4072.A0A1U8FIR1	GO Process	GO:0090143	Nucleoid organization
Cold stress	CazAAT08	4072.A0A2G2ZEV5	GO Process	GO:0006082	Organic acid metabolic process
Cold stress	CazAAT08	4072.A0A2G2ZEV5	GO Process	GO:0006520	Cellular amino acid metabolic process
Cold stress	CazAAT08	4072.A0A2G2ZEV5	GO Process	GO:0006807	Nitrogen compound metabolic process
Cold stress	CazAAT08	4072.A0A2G2ZEV5	GO Process	GO:0008152	Metabolic process
Cold stress	CazAAT08	4072.A0A2G2ZEV5	GO Process	GO:0009058	Biosynthetic process
Cold stress	CazAAT08	4072.A0A2G2ZEV5	GO Process	GO:0009987	Cellular process
Cold stress	CazAAT08	4072.A0A2G2ZEV5	GO Process	GO:0019752	Carboxylic acid metabolic process
Cold stress	CazAAT08	4072.A0A2G2ZEV5	GO Process	GO:0043436	Oxoacid metabolic process
Cold stress	CazAAT08	4072.A0A2G2ZEV5	GO Process	GO:0044237	Cellular metabolic process
Cold stress	CazAAT08	4072.A0A2G2ZEV5	GO Process	GO:0044238	Primary metabolic process
Cold stress	CazAAT08	4072.A0A2G2ZEV5	GO Process	GO:0044281	Small molecule metabolic process
Cold stress	CazAAT08	4072.A0A2G2ZEV5	GO Process	GO:0071704	Organic substance metabolic process
Cold stress	CazAAT08	4072.A0A2G2ZEV5	GO Process	GO:1901564	Organonitrogen compound metabolic process
Cold stress	CazAAT08	4072.A0A2G2ZEV5	GO Process	GO:1901605	Alpha-amino acid metabolic process
Cold stress	T459_19240	4072.A0A1U8H941	GO Process	GO:0009987	Cellular process
Cold stress	T459_19257	4072.A0A2G2Z1J7	GO Process	GO:0009987	Cellular process
Cold stress	T459_19257	4072.A0A2G2Z1J7	GO Process	GO:0010468	Regulation of gene expression
Cold stress	T459_19257	4072.A0A2G2Z1J7	GO Process	GO:0019222	Regulation of metabolic process
Cold stress	T459_19257	4072.A0A2G2Z1J7	GO Process	GO:0050789	Regulation of biological process
Cold stress	T459_19257	4072.A0A2G2Z1J7	GO Process	GO:0050794	Regulation of cellular process
Cold stress	T459_19257	4072.A0A2G2Z1J7	GO Process	GO:0060255	Regulation of macromolecule metabolic process
Cold stress	T459_19257	4072.A0A2G2Z1J7	GO Process	GO:0065007	Biological regulation
Cold stress	CazAAT09	4072.A0A1U8HJR4	GO Process	GO:0006082	Organic acid metabolic process
Cold stress	CazAAT09	4072.A0A1U8HJR4	GO Process	GO:0006520	Cellular amino acid metabolic process
Cold stress	CazAAT09	4072.A0A1U8HJR4	GO Process	GO:0006570	Tyrosine metabolic process
Cold stress	CazAAT09	4072.A0A1U8HJR4	GO Process	GO:0006572	Tyrosine catabolic process
Cold stress	CazAAT09	4072.A0A1U8HJR4	GO Process	GO:0006725	Cellular aromatic compound metabolic process
Cold stress	CazAAT09	4072.A0A1U8HJR4	GO Process	GO:0006807	Nitrogen compound metabolic process
Cold stress	CazAAT09	4072.A0A1U8HJR4	GO Process	GO:0008152	Metabolic process
Cold stress	CazAAT09	4072.A0A1U8HJR4	GO Process	GO:0009056	Catabolic process
Cold stress	CazAAT09	4072.A0A1U8HJR4	GO Process	GO:0009058	Biosynthetic process
Cold stress	CazAAT09	4072.A0A1U8HJR4	GO Process	GO:0009072	Aromatic amino acid family metabolic process
Cold stress	CazAAT09	4072.A0A1U8HJR4	GO Process	GO:0009074	Aromatic amino acid family catabolic process
Cold stress	CazAAT09	4072.A0A1U8HJR4	GO Process	GO:0009987	Cellular process
Cold stress	CazAAT09	4072.A0A1U8HJR4	GO Process	GO:0016054	Organic acid catabolic process
Cold stress	CazAAT09	4072.A0A1U8HJR4	GO Process	GO:0019439	Aromatic compound catabolic process
Cold stress	CazAAT09	4072.A0A1U8HJR4	GO Process	GO:0019752	Carboxylic acid metabolic process
Cold stress	CazAAT09	4072.A0A1U8HJR4	GO Process	GO:0043436	Oxoacid metabolic process
Cold stress	CazAAT09	4072.A0A1U8HJR4	GO Process	GO:0044237	Cellular metabolic process
Cold stress	CazAAT09	4072.A0A1U8HJR4	GO Process	GO:0044238	Primary metabolic process
Cold stress	CazAAT09	4072.A0A1U8HJR4	GO Process	GO:0044248	Cellular catabolic process
Cold stress	CazAAT09	4072.A0A1U8HJR4	GO Process	GO:0044281	Small molecule metabolic process
Cold stress	CazAAT09	4072.A0A1U8HJR4	GO Process	GO:0044282	Small molecule catabolic process
Cold stress	CazAAT09	4072.A0A1U8HJR4	GO Process	GO:0071704	Organic substance metabolic process
Cold stress	CazAAT09	4072.A0A1U8HJR4	GO Process	GO:1901360	Organic cyclic compound metabolic process
Cold stress	CazAAT09	4072.A0A1U8HJR4	GO Process	GO:1901361	Organic cyclic compound catabolic process
Cold stress	CazAAT09	4072.A0A1U8HJR4	GO Process	GO:1901564	Organonitrogen compound metabolic process
Cold stress	CazAAT09	4072.A0A1U8HJR4	GO Process	GO:1901565	Organonitrogen compound catabolic process
Cold stress	CazAAT09	4072.A0A1U8HJR4	GO Process	GO:1901575	Organic substance catabolic process
Cold stress	CazAAT09	4072.A0A1U8HJR4	GO Process	GO:1901605	Alpha-amino acid metabolic process
Cold stress	CazAAT09	4072.A0A1U8HJR4	GO Process	GO:1901606	Alpha-amino acid catabolic process
Cold stress	CazAAT11	4072.A0A1U8HBT5	GO Process	GO:0006082	Organic acid metabolic process
Cold stress	CazAAT11	4072.A0A1U8HBT5	GO Process	GO:0006103	2-oxoglutarate metabolic process
Cold stress	CazAAT11	4072.A0A1U8HBT5	GO Process	GO:0006520	Cellular amino acid metabolic process
Cold stress	CazAAT11	4072.A0A1U8HBT5	GO Process	GO:0006531	Aspartate metabolic process
Cold stress	CazAAT11	4072.A0A1U8HBT5	GO Process	GO:0006536	Glutamate metabolic process
Cold stress	CazAAT11	4072.A0A1U8HBT5	GO Process	GO:0006807	Nitrogen compound metabolic process
Cold stress	CazAAT11	4072.A0A1U8HBT5	GO Process	GO:0008152	Metabolic process
Cold stress	CazAAT11	4072.A0A1U8HBT5	GO Process	GO:0009058	Biosynthetic process
Cold stress	CazAAT11	4072.A0A1U8HBT5	GO Process	GO:0009064	Glutamine family amino acid metabolic process
Cold stress	CazAAT11	4072.A0A1U8HBT5	GO Process	GO:0009066	Aspartate family amino acid metabolic process
Cold stress	CazAAT11	4072.A0A1U8HBT5	GO Process	GO:0009987	Cellular process
Cold stress	CazAAT11	4072.A0A1U8HBT5	GO Process	GO:0019752	Carboxylic acid metabolic process
Cold stress	CazAAT11	4072.A0A1U8HBT5	GO Process	GO:0043436	Oxoacid metabolic process
Cold stress	CazAAT11	4072.A0A1U8HBT5	GO Process	GO:0043648	Dicarboxylic acid metabolic process
Cold stress	CazAAT11	4072.A0A1U8HBT5	GO Process	GO:0044237	Cellular metabolic process
Cold stress	CazAAT11	4072.A0A1U8HBT5	GO Process	GO:0044238	Primary metabolic process
Cold stress	CazAAT11	4072.A0A1U8HBT5	GO Process	GO:0044281	Small molecule metabolic process
Cold stress	CazAAT11	4072.A0A1U8HBT5	GO Process	GO:0071704	Organic substance metabolic process
Cold stress	CazAAT11	4072.A0A1U8HBT5	GO Process	GO:1901564	Organonitrogen compound metabolic process
Cold stress	CazAAT11	4072.A0A1U8HBT5	GO Process	GO:1901605	Alpha-amino acid metabolic process
Cold stress	T459_21432	4072.A0A2G2YX13	GO Process	GO:0006950	Response to stress
Cold stress	T459_21432	4072.A0A2G2YX13	GO Process	GO:0050896	Response to stimulus
Cold stress	CazAAT12	4072.A0A1U8DRU2	GO Process	GO:0006082	Organic acid metabolic process
Cold stress	CazAAT12	4072.A0A1U8DRU2	GO Process	GO:0006103	2-oxoglutarate metabolic process
Cold stress	CazAAT12	4072.A0A1U8DRU2	GO Process	GO:0006520	Cellular amino acid metabolic process
Cold stress	CazAAT12	4072.A0A1U8DRU2	GO Process	GO:0006531	Aspartate metabolic process
Cold stress	CazAAT12	4072.A0A1U8DRU2	GO Process	GO:0006536	Glutamate metabolic process
Cold stress	CazAAT12	4072.A0A1U8DRU2	GO Process	GO:0006807	Nitrogen compound metabolic process
Cold stress	CazAAT12	4072.A0A1U8DRU2	GO Process	GO:0008152	Metabolic process
Cold stress	CazAAT12	4072.A0A1U8DRU2	GO Process	GO:0009058	Biosynthetic process
Cold stress	CazAAT12	4072.A0A1U8DRU2	GO Process	GO:0009064	Glutamine family amino acid metabolic process
Cold stress	CazAAT12	4072.A0A1U8DRU2	GO Process	GO:0009066	Aspartate family amino acid metabolic process
Cold stress	CazAAT12	4072.A0A1U8DRU2	GO Process	GO:0009987	Cellular process
Cold stress	CazAAT12	4072.A0A1U8DRU2	GO Process	GO:0019752	Carboxylic acid metabolic process
Cold stress	CazAAT12	4072.A0A1U8DRU2	GO Process	GO:0043436	Oxoacid metabolic process
Cold stress	CazAAT12	4072.A0A1U8DRU2	GO Process	GO:0043648	Dicarboxylic acid metabolic process
Cold stress	CazAAT12	4072.A0A1U8DRU2	GO Process	GO:0044237	Cellular metabolic process
Cold stress	CazAAT12	4072.A0A1U8DRU2	GO Process	GO:0044238	Primary metabolic process
Cold stress	CazAAT12	4072.A0A1U8DRU2	GO Process	GO:0044281	Small molecule metabolic process
Cold stress	CazAAT12	4072.A0A1U8DRU2	GO Process	GO:0071704	Organic substance metabolic process
Cold stress	CazAAT12	4072.A0A1U8DRU2	GO Process	GO:1901564	Organonitrogen compound metabolic process
Cold stress	CazAAT12	4072.A0A1U8DRU2	GO Process	GO:1901605	Alpha-amino acid metabolic process
Cold stress	T459_21664	4072.A0A1U8E2C4	GO Process	GO:0006139	Nucleobase-containing compound metabolic process
Cold stress	T459_21664	4072.A0A1U8E2C4	GO Process	GO:0006259	DNA metabolic process
Cold stress	T459_21664	4072.A0A1U8E2C4	GO Process	GO:0006260	DNA replication
Cold stress	T459_21664	4072.A0A1U8E2C4	GO Process	GO:0006261	DNA-templated DNA replication
Cold stress	T459_21664	4072.A0A1U8E2C4	GO Process	GO:0006281	DNA repair
Cold stress	T459_21664	4072.A0A1U8E2C4	GO Process	GO:0006302	Double-strand break repair
Cold stress	T459_21664	4072.A0A1U8E2C4	GO Process	GO:0006310	DNA recombination
Cold stress	T459_21664	4072.A0A1U8E2C4	GO Process	GO:0006725	Cellular aromatic compound metabolic process
Cold stress	T459_21664	4072.A0A1U8E2C4	GO Process	GO:0006807	Nitrogen compound metabolic process
Cold stress	T459_21664	4072.A0A1U8E2C4	GO Process	GO:0006950	Response to stress
Cold stress	T459_21664	4072.A0A1U8E2C4	GO Process	GO:0006974	Cellular response to DNA damage stimulus
Cold stress	T459_21664	4072.A0A1U8E2C4	GO Process	GO:0007049	Cell cycle
Cold stress	T459_21664	4072.A0A1U8E2C4	GO Process	GO:0007275	Multicellular organism development
Cold stress	T459_21664	4072.A0A1U8E2C4	GO Process	GO:0008152	Metabolic process
Cold stress	T459_21664	4072.A0A1U8E2C4	GO Process	GO:0009058	Biosynthetic process
Cold stress	T459_21664	4072.A0A1U8E2C4	GO Process	GO:0009059	Macromolecule biosynthetic process
Cold stress	T459_21664	4072.A0A1U8E2C4	GO Process	GO:0009314	Response to radiation
Cold stress	T459_21664	4072.A0A1U8E2C4	GO Process	GO:0009416	Response to light stimulus
Cold stress	T459_21664	4072.A0A1U8E2C4	GO Process	GO:0009628	Response to abiotic stimulus
Cold stress	T459_21664	4072.A0A1U8E2C4	GO Process	GO:0009639	Response to red or far red light
Cold stress	T459_21664	4072.A0A1U8E2C4	GO Process	GO:0009640	Photomorphogenesis
Cold stress	T459_21664	4072.A0A1U8E2C4	GO Process	GO:0009653	Anatomical structure morphogenesis
Cold stress	T459_21664	4072.A0A1U8E2C4	GO Process	GO:0009791	Post-embryonic development
Cold stress	T459_21664	4072.A0A1U8E2C4	GO Process	GO:0009888	Tissue development
Cold stress	T459_21664	4072.A0A1U8E2C4	GO Process	GO:0009933	Meristem structural organization
Cold stress	T459_21664	4072.A0A1U8E2C4	GO Process	GO:0009987	Cellular process
Cold stress	T459_21664	4072.A0A1U8E2C4	GO Process	GO:0010468	Regulation of gene expression
Cold stress	T459_21664	4072.A0A1U8E2C4	GO Process	GO:0010564	Regulation of cell cycle process
Cold stress	T459_21664	4072.A0A1U8E2C4	GO Process	GO:0018130	Heterocycle biosynthetic process
Cold stress	T459_21664	4072.A0A1U8E2C4	GO Process	GO:0019222	Regulation of metabolic process
Cold stress	T459_21664	4072.A0A1U8E2C4	GO Process	GO:0019438	Aromatic compound biosynthetic process
Cold stress	T459_21664	4072.A0A1U8E2C4	GO Process	GO:0032501	Multicellular organismal process
Cold stress	T459_21664	4072.A0A1U8E2C4	GO Process	GO:0032502	Developmental process
Cold stress	T459_21664	4072.A0A1U8E2C4	GO Process	GO:0033554	Cellular response to stress
Cold stress	T459_21664	4072.A0A1U8E2C4	GO Process	GO:0034641	Cellular nitrogen compound metabolic process
Cold stress	T459_21664	4072.A0A1U8E2C4	GO Process	GO:0034654	Nucleobase-containing compound biosynthetic process
Cold stress	T459_21664	4072.A0A1U8E2C4	GO Process	GO:0043170	Macromolecule metabolic process
Cold stress	T459_21664	4072.A0A1U8E2C4	GO Process	GO:0044237	Cellular metabolic process
Cold stress	T459_21664	4072.A0A1U8E2C4	GO Process	GO:0044238	Primary metabolic process
Cold stress	T459_21664	4072.A0A1U8E2C4	GO Process	GO:0044249	Cellular biosynthetic process
Cold stress	T459_21664	4072.A0A1U8E2C4	GO Process	GO:0044260	Cellular macromolecule metabolic process
Cold stress	T459_21664	4072.A0A1U8E2C4	GO Process	GO:0044271	Cellular nitrogen compound biosynthetic process
Cold stress	T459_21664	4072.A0A1U8E2C4	GO Process	GO:0046483	Heterocycle metabolic process
Cold stress	T459_21664	4072.A0A1U8E2C4	GO Process	GO:0048507	Meristem development
Cold stress	T459_21664	4072.A0A1U8E2C4	GO Process	GO:0048532	Anatomical structure arrangement
Cold stress	T459_21664	4072.A0A1U8E2C4	GO Process	GO:0048856	Anatomical structure development
Cold stress	T459_21664	4072.A0A1U8E2C4	GO Process	GO:0050789	Regulation of biological process
Cold stress	T459_21664	4072.A0A1U8E2C4	GO Process	GO:0050794	Regulation of cellular process
Cold stress	T459_21664	4072.A0A1U8E2C4	GO Process	GO:0050896	Response to stimulus
Cold stress	T459_21664	4072.A0A1U8E2C4	GO Process	GO:0051239	Regulation of multicellular organismal process
Cold stress	T459_21664	4072.A0A1U8E2C4	GO Process	GO:0051301	Cell division
Cold stress	T459_21664	4072.A0A1U8E2C4	GO Process	GO:0051716	Cellular response to stimulus
Cold stress	T459_21664	4072.A0A1U8E2C4	GO Process	GO:0051726	Regulation of cell cycle
Cold stress	T459_21664	4072.A0A1U8E2C4	GO Process	GO:0060255	Regulation of macromolecule metabolic process
Cold stress	T459_21664	4072.A0A1U8E2C4	GO Process	GO:0065007	Biological regulation
Cold stress	T459_21664	4072.A0A1U8E2C4	GO Process	GO:0071704	Organic substance metabolic process
Cold stress	T459_21664	4072.A0A1U8E2C4	GO Process	GO:0071897	DNA biosynthetic process
Cold stress	T459_21664	4072.A0A1U8E2C4	GO Process	GO:0090304	Nucleic acid metabolic process
Cold stress	T459_21664	4072.A0A1U8E2C4	GO Process	GO:1901360	Organic cyclic compound metabolic process
Cold stress	T459_21664	4072.A0A1U8E2C4	GO Process	GO:1901362	Organic cyclic compound biosynthetic process
Cold stress	T459_21664	4072.A0A1U8E2C4	GO Process	GO:1901576	Organic substance biosynthetic process
Cold stress	T459_21664	4072.A0A1U8E2C4	GO Process	GO:1901987	Regulation of cell cycle phase transition
Cold stress	T459_21664	4072.A0A1U8E2C4	GO Process	GO:1902749	Regulation of cell cycle G2/M phase transition
Cold stress	T459_21664	4072.A0A1U8E2C4	GO Process	GO:2000011	Regulation of adaxial/abaxial pattern formation
Cold stress	CazAAT13	4072.A0A1U8DSJ1	GO Process	GO:0006082	Organic acid metabolic process
Cold stress	CazAAT13	4072.A0A1U8DSJ1	GO Process	GO:0006103	2-oxoglutarate metabolic process
Cold stress	CazAAT13	4072.A0A1U8DSJ1	GO Process	GO:0006520	Cellular amino acid metabolic process
Cold stress	CazAAT13	4072.A0A1U8DSJ1	GO Process	GO:0006531	Aspartate metabolic process
Cold stress	CazAAT13	4072.A0A1U8DSJ1	GO Process	GO:0006536	Glutamate metabolic process
Cold stress	CazAAT13	4072.A0A1U8DSJ1	GO Process	GO:0006807	Nitrogen compound metabolic process
Cold stress	CazAAT13	4072.A0A1U8DSJ1	GO Process	GO:0008152	Metabolic process
Cold stress	CazAAT13	4072.A0A1U8DSJ1	GO Process	GO:0009058	Biosynthetic process
Cold stress	CazAAT13	4072.A0A1U8DSJ1	GO Process	GO:0009064	Glutamine family amino acid metabolic process
Cold stress	CazAAT13	4072.A0A1U8DSJ1	GO Process	GO:0009066	Aspartate family amino acid metabolic process
Cold stress	CazAAT13	4072.A0A1U8DSJ1	GO Process	GO:0009987	Cellular process
Cold stress	CazAAT13	4072.A0A1U8DSJ1	GO Process	GO:0019752	Carboxylic acid metabolic process
Cold stress	CazAAT13	4072.A0A1U8DSJ1	GO Process	GO:0043436	Oxoacid metabolic process
Cold stress	CazAAT13	4072.A0A1U8DSJ1	GO Process	GO:0043648	Dicarboxylic acid metabolic process
Cold stress	CazAAT13	4072.A0A1U8DSJ1	GO Process	GO:0044237	Cellular metabolic process
Cold stress	CazAAT13	4072.A0A1U8DSJ1	GO Process	GO:0044238	Primary metabolic process
Cold stress	CazAAT13	4072.A0A1U8DSJ1	GO Process	GO:0044281	Small molecule metabolic process
Cold stress	CazAAT13	4072.A0A1U8DSJ1	GO Process	GO:0071704	Organic substance metabolic process
Cold stress	CazAAT13	4072.A0A1U8DSJ1	GO Process	GO:1901564	Organonitrogen compound metabolic process
Cold stress	CazAAT13	4072.A0A1U8DSJ1	GO Process	GO:1901605	Alpha-amino acid metabolic process
Cold stress	T459_22482	4072.A0A2G2YPM4	GO Process	GO:0006605	Protein targeting
Cold stress	T459_22482	4072.A0A2G2YPM4	GO Process	GO:0006612	Protein targeting to membrane
Cold stress	T459_22482	4072.A0A2G2YPM4	GO Process	GO:0006613	Cotranslational protein targeting to membrane
Cold stress	T459_22482	4072.A0A2G2YPM4	GO Process	GO:0006614	SRP-dependent cotranslational protein targeting to membrane
Cold stress	T459_22482	4072.A0A2G2YPM4	GO Process	GO:0006620	Post-translational protein targeting to endoplasmic reticulum membrane
Cold stress	T459_22482	4072.A0A2G2YPM4	GO Process	GO:0006810	Transport
Cold stress	T459_22482	4072.A0A2G2YPM4	GO Process	GO:0006886	Intracellular protein transport
Cold stress	T459_22482	4072.A0A2G2YPM4	GO Process	GO:0008104	Protein localization
Cold stress	T459_22482	4072.A0A2G2YPM4	GO Process	GO:0009987	Cellular process
Cold stress	T459_22482	4072.A0A2G2YPM4	GO Process	GO:0015031	Protein transport
Cold stress	T459_22482	4072.A0A2G2YPM4	GO Process	GO:0033036	Macromolecule localization
Cold stress	T459_22482	4072.A0A2G2YPM4	GO Process	GO:0033365	Protein localization to organelle
Cold stress	T459_22482	4072.A0A2G2YPM4	GO Process	GO:0045047	Protein targeting to ER
Cold stress	T459_22482	4072.A0A2G2YPM4	GO Process	GO:0045184	Establishment of protein localization
Cold stress	T459_22482	4072.A0A2G2YPM4	GO Process	GO:0046907	Intracellular transport
Cold stress	T459_22482	4072.A0A2G2YPM4	GO Process	GO:0051179	Localization
Cold stress	T459_22482	4072.A0A2G2YPM4	GO Process	GO:0051234	Establishment of localization
Cold stress	T459_22482	4072.A0A2G2YPM4	GO Process	GO:0051641	Cellular localization
Cold stress	T459_22482	4072.A0A2G2YPM4	GO Process	GO:0051649	Establishment of localization in cell
Cold stress	T459_22482	4072.A0A2G2YPM4	GO Process	GO:0051668	Localization within membrane
Cold stress	T459_22482	4072.A0A2G2YPM4	GO Process	GO:0055085	Transmembrane transport
Cold stress	T459_22482	4072.A0A2G2YPM4	GO Process	GO:0070727	Cellular macromolecule localization
Cold stress	T459_22482	4072.A0A2G2YPM4	GO Process	GO:0070972	Protein localization to endoplasmic reticulum
Cold stress	T459_22482	4072.A0A2G2YPM4	GO Process	GO:0071702	Organic substance transport
Cold stress	T459_22482	4072.A0A2G2YPM4	GO Process	GO:0071705	Nitrogen compound transport
Cold stress	T459_22482	4072.A0A2G2YPM4	GO Process	GO:0071806	Protein transmembrane transport
Cold stress	T459_22482	4072.A0A2G2YPM4	GO Process	GO:0072594	Establishment of protein localization to organelle
Cold stress	T459_22482	4072.A0A2G2YPM4	GO Process	GO:0072599	Establishment of protein localization to endoplasmic reticulum
Cold stress	T459_22482	4072.A0A2G2YPM4	GO Process	GO:0072657	Protein localization to membrane
Cold stress	T459_22482	4072.A0A2G2YPM4	GO Process	GO:0090150	Establishment of protein localization to membrane
Cold stress	T459_23911	4072.A0A2G2YTQ7	GO Process	GO:0006807	Nitrogen compound metabolic process
Cold stress	T459_23911	4072.A0A2G2YTQ7	GO Process	GO:0008152	Metabolic process
Cold stress	T459_23911	4072.A0A2G2YTQ7	GO Process	GO:0009987	Cellular process
Cold stress	T459_23911	4072.A0A2G2YTQ7	GO Process	GO:0043170	Macromolecule metabolic process
Cold stress	T459_23911	4072.A0A2G2YTQ7	GO Process	GO:0044238	Primary metabolic process
Cold stress	T459_23911	4072.A0A2G2YTQ7	GO Process	GO:0071704	Organic substance metabolic process
Cold stress	T459_23911	4072.A0A2G2YTQ7	GO Process	GO:1901564	Organonitrogen compound metabolic process
Cold stress	T459_25550	4072.A0A2G2YL26	GO Process	GO:0006082	Organic acid metabolic process
Cold stress	T459_25550	4072.A0A2G2YL26	GO Process	GO:0006520	Cellular amino acid metabolic process
Cold stress	T459_25550	4072.A0A2G2YL26	GO Process	GO:0006725	Cellular aromatic compound metabolic process
Cold stress	T459_25550	4072.A0A2G2YL26	GO Process	GO:0006793	Phosphorus metabolic process
Cold stress	T459_25550	4072.A0A2G2YL26	GO Process	GO:0006796	Phosphate-containing compound metabolic process
Cold stress	T459_25550	4072.A0A2G2YL26	GO Process	GO:0006807	Nitrogen compound metabolic process
Cold stress	T459_25550	4072.A0A2G2YL26	GO Process	GO:0008152	Metabolic process
Cold stress	T459_25550	4072.A0A2G2YL26	GO Process	GO:0008652	Cellular amino acid biosynthetic process
Cold stress	T459_25550	4072.A0A2G2YL26	GO Process	GO:0009058	Biosynthetic process
Cold stress	T459_25550	4072.A0A2G2YL26	GO Process	GO:0009072	Aromatic amino acid family metabolic process
Cold stress	T459_25550	4072.A0A2G2YL26	GO Process	GO:0009073	Aromatic amino acid family biosynthetic process
Cold stress	T459_25550	4072.A0A2G2YL26	GO Process	GO:0009423	Chorismate biosynthetic process
Cold stress	T459_25550	4072.A0A2G2YL26	GO Process	GO:0009987	Cellular process
Cold stress	T459_25550	4072.A0A2G2YL26	GO Process	GO:0016053	Organic acid biosynthetic process
Cold stress	T459_25550	4072.A0A2G2YL26	GO Process	GO:0016310	Phosphorylation
Cold stress	T459_25550	4072.A0A2G2YL26	GO Process	GO:0019438	Aromatic compound biosynthetic process
Cold stress	T459_25550	4072.A0A2G2YL26	GO Process	GO:0019752	Carboxylic acid metabolic process
Cold stress	T459_25550	4072.A0A2G2YL26	GO Process	GO:0043436	Oxoacid metabolic process
Cold stress	T459_25550	4072.A0A2G2YL26	GO Process	GO:0043648	Dicarboxylic acid metabolic process
Cold stress	T459_25550	4072.A0A2G2YL26	GO Process	GO:0043650	Dicarboxylic acid biosynthetic process
Cold stress	T459_25550	4072.A0A2G2YL26	GO Process	GO:0044237	Cellular metabolic process
Cold stress	T459_25550	4072.A0A2G2YL26	GO Process	GO:0044238	Primary metabolic process
Cold stress	T459_25550	4072.A0A2G2YL26	GO Process	GO:0044249	Cellular biosynthetic process
Cold stress	T459_25550	4072.A0A2G2YL26	GO Process	GO:0044281	Small molecule metabolic process
Cold stress	T459_25550	4072.A0A2G2YL26	GO Process	GO:0044283	Small molecule biosynthetic process
Cold stress	T459_25550	4072.A0A2G2YL26	GO Process	GO:0046394	Carboxylic acid biosynthetic process
Cold stress	T459_25550	4072.A0A2G2YL26	GO Process	GO:0046417	Chorismate metabolic process
Cold stress	T459_25550	4072.A0A2G2YL26	GO Process	GO:0071704	Organic substance metabolic process
Cold stress	T459_25550	4072.A0A2G2YL26	GO Process	GO:1901360	Organic cyclic compound metabolic process
Cold stress	T459_25550	4072.A0A2G2YL26	GO Process	GO:1901362	Organic cyclic compound biosynthetic process
Cold stress	T459_25550	4072.A0A2G2YL26	GO Process	GO:1901564	Organonitrogen compound metabolic process
Cold stress	T459_25550	4072.A0A2G2YL26	GO Process	GO:1901566	Organonitrogen compound biosynthetic process
Cold stress	T459_25550	4072.A0A2G2YL26	GO Process	GO:1901576	Organic substance biosynthetic process
Cold stress	T459_25844	4072.A0A1U8EC14	GO Process	GO:0009987	Cellular process
Cold stress	T459_26857	4072.A0A1U8EKC1	GO Process	GO:0006950	Response to stress
Cold stress	T459_26857	4072.A0A1U8EKC1	GO Process	GO:0006952	Defense response
Cold stress	T459_26857	4072.A0A1U8EKC1	GO Process	GO:0009605	Response to external stimulus
Cold stress	T459_26857	4072.A0A1U8EKC1	GO Process	GO:0009607	Response to biotic stimulus
Cold stress	T459_26857	4072.A0A1U8EKC1	GO Process	GO:0043207	Response to external biotic stimulus
Cold stress	T459_26857	4072.A0A1U8EKC1	GO Process	GO:0044419	Biological process involved in interspecies interaction between organisms
Cold stress	T459_26857	4072.A0A1U8EKC1	GO Process	GO:0050896	Response to stimulus
Cold stress	T459_26857	4072.A0A1U8EKC1	GO Process	GO:0051707	Response to other organism
Cold stress	T459_26872	4072.A0A1U8EJJ3	GO Process	GO:0006508	Proteolysis
Cold stress	T459_26872	4072.A0A1U8EJJ3	GO Process	GO:0006807	Nitrogen compound metabolic process
Cold stress	T459_26872	4072.A0A1U8EJJ3	GO Process	GO:0008152	Metabolic process
Cold stress	T459_26872	4072.A0A1U8EJJ3	GO Process	GO:0019538	Protein metabolic process
Cold stress	T459_26872	4072.A0A1U8EJJ3	GO Process	GO:0043170	Macromolecule metabolic process
Cold stress	T459_26872	4072.A0A1U8EJJ3	GO Process	GO:0044238	Primary metabolic process
Cold stress	T459_26872	4072.A0A1U8EJJ3	GO Process	GO:0071704	Organic substance metabolic process
Cold stress	T459_26872	4072.A0A1U8EJJ3	GO Process	GO:1901564	Organonitrogen compound metabolic process
Cold stress	T459_27730	4072.A0A2G2YES1	GO Process	GO:0009888	Tissue development
Cold stress	T459_27730	4072.A0A2G2YES1	GO Process	GO:0010087	Phloem or xylem histogenesis
Cold stress	T459_27730	4072.A0A2G2YES1	GO Process	GO:0010088	Phloem development
Cold stress	T459_27730	4072.A0A2G2YES1	GO Process	GO:0032502	Developmental process
Cold stress	T459_27730	4072.A0A2G2YES1	GO Process	GO:0048856	Anatomical structure development
Cold stress	T459_28302	4072.A0A2G2YGH2	GO Process	GO:0007154	Cell communication
Cold stress	T459_28302	4072.A0A2G2YGH2	GO Process	GO:0007165	Signal transduction
Cold stress	T459_28302	4072.A0A2G2YGH2	GO Process	GO:0009987	Cellular process
Cold stress	T459_28302	4072.A0A2G2YGH2	GO Process	GO:0023052	Signaling
Cold stress	T459_28302	4072.A0A2G2YGH2	GO Process	GO:0050789	Regulation of biological process
Cold stress	T459_28302	4072.A0A2G2YGH2	GO Process	GO:0050794	Regulation of cellular process
Cold stress	T459_28302	4072.A0A2G2YGH2	GO Process	GO:0050896	Response to stimulus
Cold stress	T459_28302	4072.A0A2G2YGH2	GO Process	GO:0051716	Cellular response to stimulus
Cold stress	T459_28302	4072.A0A2G2YGH2	GO Process	GO:0065007	Biological regulation
Cold stress	T459_29187	4072.A0A2G2Y4U8	GO Process	GO:0006508	Proteolysis
Cold stress	T459_29187	4072.A0A2G2Y4U8	GO Process	GO:0006807	Nitrogen compound metabolic process
Cold stress	T459_29187	4072.A0A2G2Y4U8	GO Process	GO:0008152	Metabolic process
Cold stress	T459_29187	4072.A0A2G2Y4U8	GO Process	GO:0019538	Protein metabolic process
Cold stress	T459_29187	4072.A0A2G2Y4U8	GO Process	GO:0043170	Macromolecule metabolic process
Cold stress	T459_29187	4072.A0A2G2Y4U8	GO Process	GO:0044238	Primary metabolic process
Cold stress	T459_29187	4072.A0A2G2Y4U8	GO Process	GO:0071704	Organic substance metabolic process
Cold stress	T459_29187	4072.A0A2G2Y4U8	GO Process	GO:1901564	Organonitrogen compound metabolic process
Cold stress	T459_29253	4072.A0A2G2Y526	GO Process	GO:0006508	Proteolysis
Cold stress	T459_29253	4072.A0A2G2Y526	GO Process	GO:0006807	Nitrogen compound metabolic process
Cold stress	T459_29253	4072.A0A2G2Y526	GO Process	GO:0008152	Metabolic process
Cold stress	T459_29253	4072.A0A2G2Y526	GO Process	GO:0019538	Protein metabolic process
Cold stress	T459_29253	4072.A0A2G2Y526	GO Process	GO:0043170	Macromolecule metabolic process
Cold stress	T459_29253	4072.A0A2G2Y526	GO Process	GO:0044238	Primary metabolic process
Cold stress	T459_29253	4072.A0A2G2Y526	GO Process	GO:0071704	Organic substance metabolic process
Cold stress	T459_29253	4072.A0A2G2Y526	GO Process	GO:1901564	Organonitrogen compound metabolic process
Cold stress	T459_29442	4072.A0A1U8F4Y3	GO Process	GO:0006325	Chromatin organization
Cold stress	T459_29442	4072.A0A1U8F4Y3	GO Process	GO:0006807	Nitrogen compound metabolic process
Cold stress	T459_29442	4072.A0A1U8F4Y3	GO Process	GO:0006996	Organelle organization
Cold stress	T459_29442	4072.A0A1U8F4Y3	GO Process	GO:0008152	Metabolic process
Cold stress	T459_29442	4072.A0A1U8F4Y3	GO Process	GO:0009987	Cellular process
Cold stress	T459_29442	4072.A0A1U8F4Y3	GO Process	GO:0016043	Cellular component organization
Cold stress	T459_29442	4072.A0A1U8F4Y3	GO Process	GO:0016570	Histone modification
Cold stress	T459_29442	4072.A0A1U8F4Y3	GO Process	GO:0019538	Protein metabolic process
Cold stress	T459_29442	4072.A0A1U8F4Y3	GO Process	GO:0036211	Protein modification process
Cold stress	T459_29442	4072.A0A1U8F4Y3	GO Process	GO:0043170	Macromolecule metabolic process
Cold stress	T459_29442	4072.A0A1U8F4Y3	GO Process	GO:0043412	Macromolecule modification
Cold stress	T459_29442	4072.A0A1U8F4Y3	GO Process	GO:0044238	Primary metabolic process
Cold stress	T459_29442	4072.A0A1U8F4Y3	GO Process	GO:0051276	Chromosome organization
Cold stress	T459_29442	4072.A0A1U8F4Y3	GO Process	GO:0071704	Organic substance metabolic process
Cold stress	T459_29442	4072.A0A1U8F4Y3	GO Process	GO:0071840	Cellular component organization or biogenesis
Cold stress	T459_29442	4072.A0A1U8F4Y3	GO Process	GO:1901564	Organonitrogen compound metabolic process
Cold stress	T459_29884	4072.A0A1U8FXH9	GO Process	GO:0006355	Regulation of transcription, DNA-templated
Cold stress	T459_29884	4072.A0A1U8FXH9	GO Process	GO:0006357	Regulation of transcription by RNA polymerase II
Cold stress	T459_29884	4072.A0A1U8FXH9	GO Process	GO:0007049	Cell cycle
Cold stress	T459_29884	4072.A0A1U8FXH9	GO Process	GO:0009889	Regulation of biosynthetic process
Cold stress	T459_29884	4072.A0A1U8FXH9	GO Process	GO:0009987	Cellular process
Cold stress	T459_29884	4072.A0A1U8FXH9	GO Process	GO:0010468	Regulation of gene expression
Cold stress	T459_29884	4072.A0A1U8FXH9	GO Process	GO:0010556	Regulation of macromolecule biosynthetic process
Cold stress	T459_29884	4072.A0A1U8FXH9	GO Process	GO:0019219	Regulation of nucleobase-containing compound metabolic process
Cold stress	T459_29884	4072.A0A1U8FXH9	GO Process	GO:0019222	Regulation of metabolic process
Cold stress	T459_29884	4072.A0A1U8FXH9	GO Process	GO:0031323	Regulation of cellular metabolic process
Cold stress	T459_29884	4072.A0A1U8FXH9	GO Process	GO:0031326	Regulation of cellular biosynthetic process
Cold stress	T459_29884	4072.A0A1U8FXH9	GO Process	GO:0050789	Regulation of biological process
Cold stress	T459_29884	4072.A0A1U8FXH9	GO Process	GO:0050794	Regulation of cellular process
Cold stress	T459_29884	4072.A0A1U8FXH9	GO Process	GO:0051171	Regulation of nitrogen compound metabolic process
Cold stress	T459_29884	4072.A0A1U8FXH9	GO Process	GO:0051252	Regulation of RNA metabolic process
Cold stress	T459_29884	4072.A0A1U8FXH9	GO Process	GO:0060255	Regulation of macromolecule metabolic process
Cold stress	T459_29884	4072.A0A1U8FXH9	GO Process	GO:0065007	Biological regulation
Cold stress	T459_29884	4072.A0A1U8FXH9	GO Process	GO:0080090	Regulation of primary metabolic process
Cold stress	T459_29884	4072.A0A1U8FXH9	GO Process	GO:1903506	Regulation of nucleic acid-templated transcription
Cold stress	T459_29884	4072.A0A1U8FXH9	GO Process	GO:2001141	Regulation of RNA biosynthetic process
Cold stress	T459_30362	4072.A0A2G2Y859	GO Process	GO:0006468	Protein phosphorylation
Cold stress	T459_30362	4072.A0A2G2Y859	GO Process	GO:0006793	Phosphorus metabolic process
Cold stress	T459_30362	4072.A0A2G2Y859	GO Process	GO:0006796	Phosphate-containing compound metabolic process
Cold stress	T459_30362	4072.A0A2G2Y859	GO Process	GO:0006807	Nitrogen compound metabolic process
Cold stress	T459_30362	4072.A0A2G2Y859	GO Process	GO:0008152	Metabolic process
Cold stress	T459_30362	4072.A0A2G2Y859	GO Process	GO:0009987	Cellular process
Cold stress	T459_30362	4072.A0A2G2Y859	GO Process	GO:0016310	Phosphorylation
Cold stress	T459_30362	4072.A0A2G2Y859	GO Process	GO:0019538	Protein metabolic process
Cold stress	T459_30362	4072.A0A2G2Y859	GO Process	GO:0036211	Protein modification process
Cold stress	T459_30362	4072.A0A2G2Y859	GO Process	GO:0043170	Macromolecule metabolic process
Cold stress	T459_30362	4072.A0A2G2Y859	GO Process	GO:0043412	Macromolecule modification
Cold stress	T459_30362	4072.A0A2G2Y859	GO Process	GO:0044237	Cellular metabolic process
Cold stress	T459_30362	4072.A0A2G2Y859	GO Process	GO:0044238	Primary metabolic process
Cold stress	T459_30362	4072.A0A2G2Y859	GO Process	GO:0071704	Organic substance metabolic process
Cold stress	T459_30362	4072.A0A2G2Y859	GO Process	GO:1901564	Organonitrogen compound metabolic process
Cold stress	T459_31147	4072.A0A1U8F7B4	GO Process	GO:0006518	Peptide metabolic process
Cold stress	T459_31147	4072.A0A1U8F7B4	GO Process	GO:0006575	Cellular modified amino acid metabolic process
Cold stress	T459_31147	4072.A0A1U8F7B4	GO Process	GO:0006749	Glutathione metabolic process
Cold stress	T459_31147	4072.A0A1U8F7B4	GO Process	GO:0006751	Glutathione catabolic process
Cold stress	T459_31147	4072.A0A1U8F7B4	GO Process	GO:0006790	Sulfur compound metabolic process
Cold stress	T459_31147	4072.A0A1U8F7B4	GO Process	GO:0006807	Nitrogen compound metabolic process
Cold stress	T459_31147	4072.A0A1U8F7B4	GO Process	GO:0008152	Metabolic process
Cold stress	T459_31147	4072.A0A1U8F7B4	GO Process	GO:0009056	Catabolic process
Cold stress	T459_31147	4072.A0A1U8F7B4	GO Process	GO:0009987	Cellular process
Cold stress	T459_31147	4072.A0A1U8F7B4	GO Process	GO:0034641	Cellular nitrogen compound metabolic process
Cold stress	T459_31147	4072.A0A1U8F7B4	GO Process	GO:0042219	Cellular modified amino acid catabolic process
Cold stress	T459_31147	4072.A0A1U8F7B4	GO Process	GO:0043171	Peptide catabolic process
Cold stress	T459_31147	4072.A0A1U8F7B4	GO Process	GO:0043603	Cellular amide metabolic process
Cold stress	T459_31147	4072.A0A1U8F7B4	GO Process	GO:0044237	Cellular metabolic process
Cold stress	T459_31147	4072.A0A1U8F7B4	GO Process	GO:0044248	Cellular catabolic process
Cold stress	T459_31147	4072.A0A1U8F7B4	GO Process	GO:0044273	Sulfur compound catabolic process
Cold stress	T459_31147	4072.A0A1U8F7B4	GO Process	GO:0071704	Organic substance metabolic process
Cold stress	T459_31147	4072.A0A1U8F7B4	GO Process	GO:1901564	Organonitrogen compound metabolic process
Cold stress	T459_31147	4072.A0A1U8F7B4	GO Process	GO:1901565	Organonitrogen compound catabolic process
Cold stress	T459_31147	4072.A0A1U8F7B4	GO Process	GO:1901575	Organic substance catabolic process
Cold stress	T459_32932	4072.A0A2G2Y0E6	GO Process	GO:0006807	Nitrogen compound metabolic process
Cold stress	T459_32932	4072.A0A2G2Y0E6	GO Process	GO:0008152	Metabolic process
Cold stress	T459_32932	4072.A0A2G2Y0E6	GO Process	GO:0016567	Protein ubiquitination
Cold stress	T459_32932	4072.A0A2G2Y0E6	GO Process	GO:0019538	Protein metabolic process
Cold stress	T459_32932	4072.A0A2G2Y0E6	GO Process	GO:0032446	Protein modification by small protein conjugation
Cold stress	T459_32932	4072.A0A2G2Y0E6	GO Process	GO:0036211	Protein modification process
Cold stress	T459_32932	4072.A0A2G2Y0E6	GO Process	GO:0043170	Macromolecule metabolic process
Cold stress	T459_32932	4072.A0A2G2Y0E6	GO Process	GO:0043412	Macromolecule modification
Cold stress	T459_32932	4072.A0A2G2Y0E6	GO Process	GO:0044238	Primary metabolic process
Cold stress	T459_32932	4072.A0A2G2Y0E6	GO Process	GO:0070647	Protein modification by small protein conjugation or removal
Cold stress	T459_32932	4072.A0A2G2Y0E6	GO Process	GO:0071704	Organic substance metabolic process
Cold stress	T459_32932	4072.A0A2G2Y0E6	GO Process	GO:1901564	Organonitrogen compound metabolic process
Cold stress	T459_32966	4072.A0A1U8E5K7	GO Process	GO:0009987	Cellular process
Cold stress	T459_33677	4072.A0A2G2XYC2	GO Process	GO:0000738	DNA catabolic process, exonucleolytic
Cold stress	T459_33677	4072.A0A2G2XYC2	GO Process	GO:0006139	Nucleobase-containing compound metabolic process
Cold stress	T459_33677	4072.A0A2G2XYC2	GO Process	GO:0006259	DNA metabolic process
Cold stress	T459_33677	4072.A0A2G2XYC2	GO Process	GO:0006308	DNA catabolic process
Cold stress	T459_33677	4072.A0A2G2XYC2	GO Process	GO:0006725	Cellular aromatic compound metabolic process
Cold stress	T459_33677	4072.A0A2G2XYC2	GO Process	GO:0006807	Nitrogen compound metabolic process
Cold stress	T459_33677	4072.A0A2G2XYC2	GO Process	GO:0008152	Metabolic process
Cold stress	T459_33677	4072.A0A2G2XYC2	GO Process	GO:0009056	Catabolic process
Cold stress	T459_33677	4072.A0A2G2XYC2	GO Process	GO:0009057	Macromolecule catabolic process
Cold stress	T459_33677	4072.A0A2G2XYC2	GO Process	GO:0009987	Cellular process
Cold stress	T459_33677	4072.A0A2G2XYC2	GO Process	GO:0019439	Aromatic compound catabolic process
Cold stress	T459_33677	4072.A0A2G2XYC2	GO Process	GO:0034641	Cellular nitrogen compound metabolic process
Cold stress	T459_33677	4072.A0A2G2XYC2	GO Process	GO:0034655	Nucleobase-containing compound catabolic process
Cold stress	T459_33677	4072.A0A2G2XYC2	GO Process	GO:0043170	Macromolecule metabolic process
Cold stress	T459_33677	4072.A0A2G2XYC2	GO Process	GO:0044237	Cellular metabolic process
Cold stress	T459_33677	4072.A0A2G2XYC2	GO Process	GO:0044238	Primary metabolic process
Cold stress	T459_33677	4072.A0A2G2XYC2	GO Process	GO:0044248	Cellular catabolic process
Cold stress	T459_33677	4072.A0A2G2XYC2	GO Process	GO:0044260	Cellular macromolecule metabolic process
Cold stress	T459_33677	4072.A0A2G2XYC2	GO Process	GO:0044265	Cellular macromolecule catabolic process
Cold stress	T459_33677	4072.A0A2G2XYC2	GO Process	GO:0044270	Cellular nitrogen compound catabolic process
Cold stress	T459_33677	4072.A0A2G2XYC2	GO Process	GO:0046483	Heterocycle metabolic process
Cold stress	T459_33677	4072.A0A2G2XYC2	GO Process	GO:0046700	Heterocycle catabolic process
Cold stress	T459_33677	4072.A0A2G2XYC2	GO Process	GO:0071704	Organic substance metabolic process
Cold stress	T459_33677	4072.A0A2G2XYC2	GO Process	GO:0090304	Nucleic acid metabolic process
Cold stress	T459_33677	4072.A0A2G2XYC2	GO Process	GO:0090305	Nucleic acid phosphodiester bond hydrolysis
Cold stress	T459_33677	4072.A0A2G2XYC2	GO Process	GO:1901360	Organic cyclic compound metabolic process
Cold stress	T459_33677	4072.A0A2G2XYC2	GO Process	GO:1901361	Organic cyclic compound catabolic process
Cold stress	T459_33677	4072.A0A2G2XYC2	GO Process	GO:1901575	Organic substance catabolic process
Cold stress	T459_34600	4072.A0A2G2XVM9	GO Process	GO:0009987	Cellular process
Cold stress	T459_34802	4072.A0A2G2XV37	GO Process	GO:0050896	Response to stimulus
Cold stress	T459_34866	4072.A0A2G2XVE4	GO Process	GO:0006082	Organic acid metabolic process
Cold stress	T459_34866	4072.A0A2G2XVE4	GO Process	GO:0006139	Nucleobase-containing compound metabolic process
Cold stress	T459_34866	4072.A0A2G2XVE4	GO Process	GO:0006399	tRNA metabolic process
Cold stress	T459_34866	4072.A0A2G2XVE4	GO Process	GO:0006412	Translation
Cold stress	T459_34866	4072.A0A2G2XVE4	GO Process	GO:0006418	tRNA aminoacylation for protein translation
Cold stress	T459_34866	4072.A0A2G2XVE4	GO Process	GO:0006422	aspartyl-tRNA aminoacylation
Cold stress	T459_34866	4072.A0A2G2XVE4	GO Process	GO:0006518	Peptide metabolic process
Cold stress	T459_34866	4072.A0A2G2XVE4	GO Process	GO:0006520	Cellular amino acid metabolic process
Cold stress	T459_34866	4072.A0A2G2XVE4	GO Process	GO:0006725	Cellular aromatic compound metabolic process
Cold stress	T459_34866	4072.A0A2G2XVE4	GO Process	GO:0006807	Nitrogen compound metabolic process
Cold stress	T459_34866	4072.A0A2G2XVE4	GO Process	GO:0008152	Metabolic process
Cold stress	T459_34866	4072.A0A2G2XVE4	GO Process	GO:0009058	Biosynthetic process
Cold stress	T459_34866	4072.A0A2G2XVE4	GO Process	GO:0009059	Macromolecule biosynthetic process
Cold stress	T459_34866	4072.A0A2G2XVE4	GO Process	GO:0009987	Cellular process
Cold stress	T459_34866	4072.A0A2G2XVE4	GO Process	GO:0010467	Gene expression
Cold stress	T459_34866	4072.A0A2G2XVE4	GO Process	GO:0016070	RNA metabolic process
Cold stress	T459_34866	4072.A0A2G2XVE4	GO Process	GO:0019538	Protein metabolic process
Cold stress	T459_34866	4072.A0A2G2XVE4	GO Process	GO:0019752	Carboxylic acid metabolic process
Cold stress	T459_34866	4072.A0A2G2XVE4	GO Process	GO:0034641	Cellular nitrogen compound metabolic process
Cold stress	T459_34866	4072.A0A2G2XVE4	GO Process	GO:0034645	Cellular macromolecule biosynthetic process
Cold stress	T459_34866	4072.A0A2G2XVE4	GO Process	GO:0034660	ncRNA metabolic process
Cold stress	T459_34866	4072.A0A2G2XVE4	GO Process	GO:0043038	Amino acid activation
Cold stress	T459_34866	4072.A0A2G2XVE4	GO Process	GO:0043039	tRNA aminoacylation
Cold stress	T459_34866	4072.A0A2G2XVE4	GO Process	GO:0043043	Peptide biosynthetic process
Cold stress	T459_34866	4072.A0A2G2XVE4	GO Process	GO:0043170	Macromolecule metabolic process
Cold stress	T459_34866	4072.A0A2G2XVE4	GO Process	GO:0043436	Oxoacid metabolic process
Cold stress	T459_34866	4072.A0A2G2XVE4	GO Process	GO:0043603	Cellular amide metabolic process
Cold stress	T459_34866	4072.A0A2G2XVE4	GO Process	GO:0043604	Amide biosynthetic process
Cold stress	T459_34866	4072.A0A2G2XVE4	GO Process	GO:0044237	Cellular metabolic process
Cold stress	T459_34866	4072.A0A2G2XVE4	GO Process	GO:0044238	Primary metabolic process
Cold stress	T459_34866	4072.A0A2G2XVE4	GO Process	GO:0044249	Cellular biosynthetic process
Cold stress	T459_34866	4072.A0A2G2XVE4	GO Process	GO:0044260	Cellular macromolecule metabolic process
Cold stress	T459_34866	4072.A0A2G2XVE4	GO Process	GO:0044271	Cellular nitrogen compound biosynthetic process
Cold stress	T459_34866	4072.A0A2G2XVE4	GO Process	GO:0044281	Small molecule metabolic process
Cold stress	T459_34866	4072.A0A2G2XVE4	GO Process	GO:0046483	Heterocycle metabolic process
Cold stress	T459_34866	4072.A0A2G2XVE4	GO Process	GO:0071704	Organic substance metabolic process
Cold stress	T459_34866	4072.A0A2G2XVE4	GO Process	GO:0090304	Nucleic acid metabolic process
Cold stress	T459_34866	4072.A0A2G2XVE4	GO Process	GO:1901360	Organic cyclic compound metabolic process
Cold stress	T459_34866	4072.A0A2G2XVE4	GO Process	GO:1901564	Organonitrogen compound metabolic process
Cold stress	T459_34866	4072.A0A2G2XVE4	GO Process	GO:1901566	Organonitrogen compound biosynthetic process
Cold stress	T459_34866	4072.A0A2G2XVE4	GO Process	GO:1901576	Organic substance biosynthetic process
Cold stress	sdh3	4072.A0A075VWF9	GO Process	GO:0006091	Generation of precursor metabolites and energy
Cold stress	sdh3	4072.A0A075VWF9	GO Process	GO:0006099	Tricarboxylic acid cycle
Cold stress	sdh3	4072.A0A075VWF9	GO Process	GO:0008152	Metabolic process
Cold stress	sdh3	4072.A0A075VWF9	GO Process	GO:0009060	Aerobic respiration
Cold stress	sdh3	4072.A0A075VWF9	GO Process	GO:0009987	Cellular process
Cold stress	sdh3	4072.A0A075VWF9	GO Process	GO:0015980	Energy derivation by oxidation of organic compounds
Cold stress	sdh3	4072.A0A075VWF9	GO Process	GO:0022900	Electron transport chain
Cold stress	sdh3	4072.A0A075VWF9	GO Process	GO:0044237	Cellular metabolic process
Cold stress	sdh3	4072.A0A075VWF9	GO Process	GO:0044238	Primary metabolic process
Cold stress	sdh3	4072.A0A075VWF9	GO Process	GO:0045333	Cellular respiration
Heat stress	AQP	4072.D1M6Z5	GO Process	GO:0006810	Transport
Heat stress	AQP	4072.D1M6Z5	GO Process	GO:0006833	Water transport
Heat stress	AQP	4072.D1M6Z5	GO Process	GO:0009987	Cellular process
Heat stress	AQP	4072.D1M6Z5	GO Process	GO:0042044	Fluid transport
Heat stress	AQP	4072.D1M6Z5	GO Process	GO:0051179	Localization
Heat stress	AQP	4072.D1M6Z5	GO Process	GO:0051234	Establishment of localization
Heat stress	AQP	4072.D1M6Z5	GO Process	GO:0055085	Transmembrane transport
Heat stress	T459_00034	4072.A0A2G3AD26	GO Process	GO:0006412	Translation
Heat stress	T459_00034	4072.A0A2G3AD26	GO Process	GO:0006518	Peptide metabolic process
Heat stress	T459_00034	4072.A0A2G3AD26	GO Process	GO:0006807	Nitrogen compound metabolic process
Heat stress	T459_00034	4072.A0A2G3AD26	GO Process	GO:0008152	Metabolic process
Heat stress	T459_00034	4072.A0A2G3AD26	GO Process	GO:0009058	Biosynthetic process
Heat stress	T459_00034	4072.A0A2G3AD26	GO Process	GO:0009059	Macromolecule biosynthetic process
Heat stress	T459_00034	4072.A0A2G3AD26	GO Process	GO:0009987	Cellular process
Heat stress	T459_00034	4072.A0A2G3AD26	GO Process	GO:0010467	Gene expression
Heat stress	T459_00034	4072.A0A2G3AD26	GO Process	GO:0019538	Protein metabolic process
Heat stress	T459_00034	4072.A0A2G3AD26	GO Process	GO:0034641	Cellular nitrogen compound metabolic process
Heat stress	T459_00034	4072.A0A2G3AD26	GO Process	GO:0034645	Cellular macromolecule biosynthetic process
Heat stress	T459_00034	4072.A0A2G3AD26	GO Process	GO:0043043	Peptide biosynthetic process
Heat stress	T459_00034	4072.A0A2G3AD26	GO Process	GO:0043170	Macromolecule metabolic process
Heat stress	T459_00034	4072.A0A2G3AD26	GO Process	GO:0043603	Cellular amide metabolic process
Heat stress	T459_00034	4072.A0A2G3AD26	GO Process	GO:0043604	Amide biosynthetic process
Heat stress	T459_00034	4072.A0A2G3AD26	GO Process	GO:0044237	Cellular metabolic process
Heat stress	T459_00034	4072.A0A2G3AD26	GO Process	GO:0044238	Primary metabolic process
Heat stress	T459_00034	4072.A0A2G3AD26	GO Process	GO:0044249	Cellular biosynthetic process
Heat stress	T459_00034	4072.A0A2G3AD26	GO Process	GO:0044260	Cellular macromolecule metabolic process
Heat stress	T459_00034	4072.A0A2G3AD26	GO Process	GO:0044271	Cellular nitrogen compound biosynthetic process
Heat stress	T459_00034	4072.A0A2G3AD26	GO Process	GO:0071704	Organic substance metabolic process
Heat stress	T459_00034	4072.A0A2G3AD26	GO Process	GO:1901564	Organonitrogen compound metabolic process
Heat stress	T459_00034	4072.A0A2G3AD26	GO Process	GO:1901566	Organonitrogen compound biosynthetic process
Heat stress	T459_00034	4072.A0A2G3AD26	GO Process	GO:1901576	Organic substance biosynthetic process
Heat stress	T459_01447	4072.A0A1U8F6I8	GO Process	GO:0000003	Reproduction
Heat stress	T459_01447	4072.A0A1U8F6I8	GO Process	GO:0003006	Developmental process involved in reproduction
Heat stress	T459_01447	4072.A0A1U8F6I8	GO Process	GO:0007275	Multicellular organism development
Heat stress	T459_01447	4072.A0A1U8F6I8	GO Process	GO:0007276	Gamete generation
Heat stress	T459_01447	4072.A0A1U8F6I8	GO Process	GO:0009555	Pollen development
Heat stress	T459_01447	4072.A0A1U8F6I8	GO Process	GO:0009566	Fertilization
Heat stress	T459_01447	4072.A0A1U8F6I8	GO Process	GO:0009567	Double fertilization forming a zygote and endosperm
Heat stress	T459_01447	4072.A0A1U8F6I8	GO Process	GO:0009987	Cellular process
Heat stress	T459_01447	4072.A0A1U8F6I8	GO Process	GO:0019953	Sexual reproduction
Heat stress	T459_01447	4072.A0A1U8F6I8	GO Process	GO:0022412	Cellular process involved in reproduction in multicellular organism
Heat stress	T459_01447	4072.A0A1U8F6I8	GO Process	GO:0022414	Reproductive process
Heat stress	T459_01447	4072.A0A1U8F6I8	GO Process	GO:0030154	Cell differentiation
Heat stress	T459_01447	4072.A0A1U8F6I8	GO Process	GO:0032501	Multicellular organismal process
Heat stress	T459_01447	4072.A0A1U8F6I8	GO Process	GO:0032502	Developmental process
Heat stress	T459_01447	4072.A0A1U8F6I8	GO Process	GO:0032504	Multicellular organism reproduction
Heat stress	T459_01447	4072.A0A1U8F6I8	GO Process	GO:0048229	Gametophyte development
Heat stress	T459_01447	4072.A0A1U8F6I8	GO Process	GO:0048232	Male gamete generation
Heat stress	T459_01447	4072.A0A1U8F6I8	GO Process	GO:0048235	Pollen sperm cell differentiation
Heat stress	T459_01447	4072.A0A1U8F6I8	GO Process	GO:0048609	Multicellular organismal reproductive process
Heat stress	T459_01447	4072.A0A1U8F6I8	GO Process	GO:0048856	Anatomical structure development
Heat stress	T459_01447	4072.A0A1U8F6I8	GO Process	GO:0048869	Cellular developmental process
Heat stress	T459_01447	4072.A0A1U8F6I8	GO Process	GO:0055046	Microgametogenesis
Heat stress	T459_01619	4072.A0A2G3AHN0	GO Process	GO:0006403	RNA localization
Heat stress	T459_01619	4072.A0A2G3AHN0	GO Process	GO:0006405	RNA export from nucleus
Heat stress	T459_01619	4072.A0A2G3AHN0	GO Process	GO:0006406	mRNA export from nucleus
Heat stress	T459_01619	4072.A0A2G3AHN0	GO Process	GO:0006810	Transport
Heat stress	T459_01619	4072.A0A2G3AHN0	GO Process	GO:0006913	Nucleocytoplasmic transport
Heat stress	T459_01619	4072.A0A2G3AHN0	GO Process	GO:0008152	Metabolic process
Heat stress	T459_01619	4072.A0A2G3AHN0	GO Process	GO:0009987	Cellular process
Heat stress	T459_01619	4072.A0A2G3AHN0	GO Process	GO:0010467	Gene expression
Heat stress	T459_01619	4072.A0A2G3AHN0	GO Process	GO:0015931	Nucleobase-containing compound transport
Heat stress	T459_01619	4072.A0A2G3AHN0	GO Process	GO:0016973	poly(A)+ mRNA export from nucleus
Heat stress	T459_01619	4072.A0A2G3AHN0	GO Process	GO:0033036	Macromolecule localization
Heat stress	T459_01619	4072.A0A2G3AHN0	GO Process	GO:0043170	Macromolecule metabolic process
Heat stress	T459_01619	4072.A0A2G3AHN0	GO Process	GO:0046907	Intracellular transport
Heat stress	T459_01619	4072.A0A2G3AHN0	GO Process	GO:0050657	Nucleic acid transport
Heat stress	T459_01619	4072.A0A2G3AHN0	GO Process	GO:0050658	RNA transport
Heat stress	T459_01619	4072.A0A2G3AHN0	GO Process	GO:0051028	mRNA transport
Heat stress	T459_01619	4072.A0A2G3AHN0	GO Process	GO:0051168	Nuclear export
Heat stress	T459_01619	4072.A0A2G3AHN0	GO Process	GO:0051169	Nuclear transport
Heat stress	T459_01619	4072.A0A2G3AHN0	GO Process	GO:0051179	Localization
Heat stress	T459_01619	4072.A0A2G3AHN0	GO Process	GO:0051234	Establishment of localization
Heat stress	T459_01619	4072.A0A2G3AHN0	GO Process	GO:0051236	Establishment of RNA localization
Heat stress	T459_01619	4072.A0A2G3AHN0	GO Process	GO:0051641	Cellular localization
Heat stress	T459_01619	4072.A0A2G3AHN0	GO Process	GO:0051649	Establishment of localization in cell
Heat stress	T459_01619	4072.A0A2G3AHN0	GO Process	GO:0071702	Organic substance transport
Heat stress	T459_01619	4072.A0A2G3AHN0	GO Process	GO:0071704	Organic substance metabolic process
Heat stress	T459_01619	4072.A0A2G3AHN0	GO Process	GO:0071705	Nitrogen compound transport
Heat stress	T459_02095	4072.A0A2G3AJ77	GO Process	GO:0006355	Regulation of transcription, DNA-templated
Heat stress	T459_02095	4072.A0A2G3AJ77	GO Process	GO:0006357	Regulation of transcription by RNA polymerase II
Heat stress	T459_02095	4072.A0A2G3AJ77	GO Process	GO:0006996	Organelle organization
Heat stress	T459_02095	4072.A0A2G3AJ77	GO Process	GO:0007010	Cytoskeleton organization
Heat stress	T459_02095	4072.A0A2G3AJ77	GO Process	GO:0008360	Regulation of cell shape
Heat stress	T459_02095	4072.A0A2G3AJ77	GO Process	GO:0009889	Regulation of biosynthetic process
Heat stress	T459_02095	4072.A0A2G3AJ77	GO Process	GO:0009987	Cellular process
Heat stress	T459_02095	4072.A0A2G3AJ77	GO Process	GO:0010468	Regulation of gene expression
Heat stress	T459_02095	4072.A0A2G3AJ77	GO Process	GO:0010556	Regulation of macromolecule biosynthetic process
Heat stress	T459_02095	4072.A0A2G3AJ77	GO Process	GO:0016043	Cellular component organization
Heat stress	T459_02095	4072.A0A2G3AJ77	GO Process	GO:0019219	Regulation of nucleobase-containing compound metabolic process
Heat stress	T459_02095	4072.A0A2G3AJ77	GO Process	GO:0019222	Regulation of metabolic process
Heat stress	T459_02095	4072.A0A2G3AJ77	GO Process	GO:0022603	Regulation of anatomical structure morphogenesis
Heat stress	T459_02095	4072.A0A2G3AJ77	GO Process	GO:0022604	Regulation of cell morphogenesis
Heat stress	T459_02095	4072.A0A2G3AJ77	GO Process	GO:0031323	Regulation of cellular metabolic process
Heat stress	T459_02095	4072.A0A2G3AJ77	GO Process	GO:0031326	Regulation of cellular biosynthetic process
Heat stress	T459_02095	4072.A0A2G3AJ77	GO Process	GO:0050789	Regulation of biological process
Heat stress	T459_02095	4072.A0A2G3AJ77	GO Process	GO:0050793	Regulation of developmental process
Heat stress	T459_02095	4072.A0A2G3AJ77	GO Process	GO:0050794	Regulation of cellular process
Heat stress	T459_02095	4072.A0A2G3AJ77	GO Process	GO:0051171	Regulation of nitrogen compound metabolic process
Heat stress	T459_02095	4072.A0A2G3AJ77	GO Process	GO:0051252	Regulation of RNA metabolic process
Heat stress	T459_02095	4072.A0A2G3AJ77	GO Process	GO:0060255	Regulation of macromolecule metabolic process
Heat stress	T459_02095	4072.A0A2G3AJ77	GO Process	GO:0065007	Biological regulation
Heat stress	T459_02095	4072.A0A2G3AJ77	GO Process	GO:0071840	Cellular component organization or biogenesis
Heat stress	T459_02095	4072.A0A2G3AJ77	GO Process	GO:0080090	Regulation of primary metabolic process
Heat stress	T459_02095	4072.A0A2G3AJ77	GO Process	GO:1903506	Regulation of nucleic acid-templated transcription
Heat stress	T459_02095	4072.A0A2G3AJ77	GO Process	GO:2001141	Regulation of RNA biosynthetic process
Heat stress	T459_05311	4072.A0A1U8FAA8	GO Process	GO:0000271	Polysaccharide biosynthetic process
Heat stress	T459_05311	4072.A0A1U8FAA8	GO Process	GO:0005975	Carbohydrate metabolic process
Heat stress	T459_05311	4072.A0A1U8FAA8	GO Process	GO:0005976	Polysaccharide metabolic process
Heat stress	T459_05311	4072.A0A1U8FAA8	GO Process	GO:0005982	Starch metabolic process
Heat stress	T459_05311	4072.A0A1U8FAA8	GO Process	GO:0006073	Cellular glucan metabolic process
Heat stress	T459_05311	4072.A0A1U8FAA8	GO Process	GO:0008152	Metabolic process
Heat stress	T459_05311	4072.A0A1U8FAA8	GO Process	GO:0009058	Biosynthetic process
Heat stress	T459_05311	4072.A0A1U8FAA8	GO Process	GO:0009059	Macromolecule biosynthetic process
Heat stress	T459_05311	4072.A0A1U8FAA8	GO Process	GO:0009250	Glucan biosynthetic process
Heat stress	T459_05311	4072.A0A1U8FAA8	GO Process	GO:0009987	Cellular process
Heat stress	T459_05311	4072.A0A1U8FAA8	GO Process	GO:0016051	Carbohydrate biosynthetic process
Heat stress	T459_05311	4072.A0A1U8FAA8	GO Process	GO:0019252	Starch biosynthetic process
Heat stress	T459_05311	4072.A0A1U8FAA8	GO Process	GO:0033692	Cellular polysaccharide biosynthetic process
Heat stress	T459_05311	4072.A0A1U8FAA8	GO Process	GO:0034637	Cellular carbohydrate biosynthetic process
Heat stress	T459_05311	4072.A0A1U8FAA8	GO Process	GO:0034645	Cellular macromolecule biosynthetic process
Heat stress	T459_05311	4072.A0A1U8FAA8	GO Process	GO:0043170	Macromolecule metabolic process
Heat stress	T459_05311	4072.A0A1U8FAA8	GO Process	GO:0044042	Glucan metabolic process
Heat stress	T459_05311	4072.A0A1U8FAA8	GO Process	GO:0044237	Cellular metabolic process
Heat stress	T459_05311	4072.A0A1U8FAA8	GO Process	GO:0044238	Primary metabolic process
Heat stress	T459_05311	4072.A0A1U8FAA8	GO Process	GO:0044249	Cellular biosynthetic process
Heat stress	T459_05311	4072.A0A1U8FAA8	GO Process	GO:0044260	Cellular macromolecule metabolic process
Heat stress	T459_05311	4072.A0A1U8FAA8	GO Process	GO:0044262	Cellular carbohydrate metabolic process
Heat stress	T459_05311	4072.A0A1U8FAA8	GO Process	GO:0044264	Cellular polysaccharide metabolic process
Heat stress	T459_05311	4072.A0A1U8FAA8	GO Process	GO:0071704	Organic substance metabolic process
Heat stress	T459_05311	4072.A0A1U8FAA8	GO Process	GO:1901576	Organic substance biosynthetic process
Heat stress	T459_05964	4072.A0A2G3A9I7	GO Process	GO:0006082	Organic acid metabolic process
Heat stress	T459_05964	4072.A0A2G3A9I7	GO Process	GO:0006629	Lipid metabolic process
Heat stress	T459_05964	4072.A0A2G3A9I7	GO Process	GO:0006631	Fatty acid metabolic process
Heat stress	T459_05964	4072.A0A2G3A9I7	GO Process	GO:0008152	Metabolic process
Heat stress	T459_05964	4072.A0A2G3A9I7	GO Process	GO:0009987	Cellular process
Heat stress	T459_05964	4072.A0A2G3A9I7	GO Process	GO:0019752	Carboxylic acid metabolic process
Heat stress	T459_05964	4072.A0A2G3A9I7	GO Process	GO:0032787	Monocarboxylic acid metabolic process
Heat stress	T459_05964	4072.A0A2G3A9I7	GO Process	GO:0043436	Oxoacid metabolic process
Heat stress	T459_05964	4072.A0A2G3A9I7	GO Process	GO:0044237	Cellular metabolic process
Heat stress	T459_05964	4072.A0A2G3A9I7	GO Process	GO:0044238	Primary metabolic process
Heat stress	T459_05964	4072.A0A2G3A9I7	GO Process	GO:0044255	Cellular lipid metabolic process
Heat stress	T459_05964	4072.A0A2G3A9I7	GO Process	GO:0044281	Small molecule metabolic process
Heat stress	T459_05964	4072.A0A2G3A9I7	GO Process	GO:0071704	Organic substance metabolic process
Heat stress	T459_06537	4072.A0A2G3AB25	GO Process	GO:0007275	Multicellular organism development
Heat stress	T459_06537	4072.A0A2G3AB25	GO Process	GO:0009605	Response to external stimulus
Heat stress	T459_06537	4072.A0A2G3AB25	GO Process	GO:0009606	Tropism
Heat stress	T459_06537	4072.A0A2G3AB25	GO Process	GO:0009628	Response to abiotic stimulus
Heat stress	T459_06537	4072.A0A2G3AB25	GO Process	GO:0009629	Response to gravity
Heat stress	T459_06537	4072.A0A2G3AB25	GO Process	GO:0009630	Gravitropism
Heat stress	T459_06537	4072.A0A2G3AB25	GO Process	GO:0022622	Root system development
Heat stress	T459_06537	4072.A0A2G3AB25	GO Process	GO:0032501	Multicellular organismal process
Heat stress	T459_06537	4072.A0A2G3AB25	GO Process	GO:0032502	Developmental process
Heat stress	T459_06537	4072.A0A2G3AB25	GO Process	GO:0048364	Root development
Heat stress	T459_06537	4072.A0A2G3AB25	GO Process	GO:0048731	System development
Heat stress	T459_06537	4072.A0A2G3AB25	GO Process	GO:0048856	Anatomical structure development
Heat stress	T459_06537	4072.A0A2G3AB25	GO Process	GO:0050896	Response to stimulus
Heat stress	T459_06537	4072.A0A2G3AB25	GO Process	GO:0099402	Plant organ development
Heat stress	T459_07177	4072.A0A1U8FT28	GO Process	GO:0006355	Regulation of transcription, DNA-templated
Heat stress	T459_07177	4072.A0A1U8FT28	GO Process	GO:0009889	Regulation of biosynthetic process
Heat stress	T459_07177	4072.A0A1U8FT28	GO Process	GO:0010468	Regulation of gene expression
Heat stress	T459_07177	4072.A0A1U8FT28	GO Process	GO:0010556	Regulation of macromolecule biosynthetic process
Heat stress	T459_07177	4072.A0A1U8FT28	GO Process	GO:0019219	Regulation of nucleobase-containing compound metabolic process
Heat stress	T459_07177	4072.A0A1U8FT28	GO Process	GO:0019222	Regulation of metabolic process
Heat stress	T459_07177	4072.A0A1U8FT28	GO Process	GO:0031323	Regulation of cellular metabolic process
Heat stress	T459_07177	4072.A0A1U8FT28	GO Process	GO:0031326	Regulation of cellular biosynthetic process
Heat stress	T459_07177	4072.A0A1U8FT28	GO Process	GO:0050789	Regulation of biological process
Heat stress	T459_07177	4072.A0A1U8FT28	GO Process	GO:0050794	Regulation of cellular process
Heat stress	T459_07177	4072.A0A1U8FT28	GO Process	GO:0051171	Regulation of nitrogen compound metabolic process
Heat stress	T459_07177	4072.A0A1U8FT28	GO Process	GO:0051252	Regulation of RNA metabolic process
Heat stress	T459_07177	4072.A0A1U8FT28	GO Process	GO:0060255	Regulation of macromolecule metabolic process
Heat stress	T459_07177	4072.A0A1U8FT28	GO Process	GO:0065007	Biological regulation
Heat stress	T459_07177	4072.A0A1U8FT28	GO Process	GO:0080090	Regulation of primary metabolic process
Heat stress	T459_07177	4072.A0A1U8FT28	GO Process	GO:1903506	Regulation of nucleic acid-templated transcription
Heat stress	T459_07177	4072.A0A1U8FT28	GO Process	GO:2001141	Regulation of RNA biosynthetic process
Heat stress	T459_07279	4072.A0A2G2ZT82	GO Process	GO:0050789	Regulation of biological process
Heat stress	T459_07279	4072.A0A2G2ZT82	GO Process	GO:0050896	Response to stimulus
Heat stress	T459_07279	4072.A0A2G2ZT82	GO Process	GO:0065007	Biological regulation
Heat stress	T459_08330	4072.A0A2G2ZW63	GO Process	GO:0000003	Reproduction
Heat stress	T459_08330	4072.A0A2G2ZW63	GO Process	GO:0003006	Developmental process involved in reproduction
Heat stress	T459_08330	4072.A0A2G2ZW63	GO Process	GO:0006807	Nitrogen compound metabolic process
Heat stress	T459_08330	4072.A0A2G2ZW63	GO Process	GO:0007154	Cell communication
Heat stress	T459_08330	4072.A0A2G2ZW63	GO Process	GO:0007165	Signal transduction
Heat stress	T459_08330	4072.A0A2G2ZW63	GO Process	GO:0007275	Multicellular organism development
Heat stress	T459_08330	4072.A0A2G2ZW63	GO Process	GO:0007602	Phototransduction
Heat stress	T459_08330	4072.A0A2G2ZW63	GO Process	GO:0008152	Metabolic process
Heat stress	T459_08330	4072.A0A2G2ZW63	GO Process	GO:0009314	Response to radiation
Heat stress	T459_08330	4072.A0A2G2ZW63	GO Process	GO:0009416	Response to light stimulus
Heat stress	T459_08330	4072.A0A2G2ZW63	GO Process	GO:0009581	Detection of external stimulus
Heat stress	T459_08330	4072.A0A2G2ZW63	GO Process	GO:0009582	Detection of abiotic stimulus
Heat stress	T459_08330	4072.A0A2G2ZW63	GO Process	GO:0009583	Detection of light stimulus
Heat stress	T459_08330	4072.A0A2G2ZW63	GO Process	GO:0009585	Red, far-red light phototransduction
Heat stress	T459_08330	4072.A0A2G2ZW63	GO Process	GO:0009605	Response to external stimulus
Heat stress	T459_08330	4072.A0A2G2ZW63	GO Process	GO:0009628	Response to abiotic stimulus
Heat stress	T459_08330	4072.A0A2G2ZW63	GO Process	GO:0009639	Response to red or far red light
Heat stress	T459_08330	4072.A0A2G2ZW63	GO Process	GO:0009648	Photoperiodism
Heat stress	T459_08330	4072.A0A2G2ZW63	GO Process	GO:0009791	Post-embryonic development
Heat stress	T459_08330	4072.A0A2G2ZW63	GO Process	GO:0009987	Cellular process
Heat stress	T459_08330	4072.A0A2G2ZW63	GO Process	GO:0010017	Red or far-red light signaling pathway
Heat stress	T459_08330	4072.A0A2G2ZW63	GO Process	GO:0010099	Regulation of photomorphogenesis
Heat stress	T459_08330	4072.A0A2G2ZW63	GO Process	GO:0010228	Vegetative to reproductive phase transition of meristem
Heat stress	T459_08330	4072.A0A2G2ZW63	GO Process	GO:0016567	Protein ubiquitination
Heat stress	T459_08330	4072.A0A2G2ZW63	GO Process	GO:0019538	Protein metabolic process
Heat stress	T459_08330	4072.A0A2G2ZW63	GO Process	GO:0022414	Reproductive process
Heat stress	T459_08330	4072.A0A2G2ZW63	GO Process	GO:0023052	Signaling
Heat stress	T459_08330	4072.A0A2G2ZW63	GO Process	GO:0032446	Protein modification by small protein conjugation
Heat stress	T459_08330	4072.A0A2G2ZW63	GO Process	GO:0032501	Multicellular organismal process
Heat stress	T459_08330	4072.A0A2G2ZW63	GO Process	GO:0032502	Developmental process
Heat stress	T459_08330	4072.A0A2G2ZW63	GO Process	GO:0036211	Protein modification process
Heat stress	T459_08330	4072.A0A2G2ZW63	GO Process	GO:0043170	Macromolecule metabolic process
Heat stress	T459_08330	4072.A0A2G2ZW63	GO Process	GO:0043412	Macromolecule modification
Heat stress	T459_08330	4072.A0A2G2ZW63	GO Process	GO:0044238	Primary metabolic process
Heat stress	T459_08330	4072.A0A2G2ZW63	GO Process	GO:0048366	Leaf development
Heat stress	T459_08330	4072.A0A2G2ZW63	GO Process	GO:0048367	Shoot system development
Heat stress	T459_08330	4072.A0A2G2ZW63	GO Process	GO:0048573	Photoperiodism, flowering
Heat stress	T459_08330	4072.A0A2G2ZW63	GO Process	GO:0048580	Regulation of post-embryonic development
Heat stress	T459_08330	4072.A0A2G2ZW63	GO Process	GO:0048583	Regulation of response to stimulus
Heat stress	T459_08330	4072.A0A2G2ZW63	GO Process	GO:0048608	Reproductive structure development
Heat stress	T459_08330	4072.A0A2G2ZW63	GO Process	GO:0048731	System development
Heat stress	T459_08330	4072.A0A2G2ZW63	GO Process	GO:0048827	Phyllome development
Heat stress	T459_08330	4072.A0A2G2ZW63	GO Process	GO:0048856	Anatomical structure development
Heat stress	T459_08330	4072.A0A2G2ZW63	GO Process	GO:0050789	Regulation of biological process
Heat stress	T459_08330	4072.A0A2G2ZW63	GO Process	GO:0050793	Regulation of developmental process
Heat stress	T459_08330	4072.A0A2G2ZW63	GO Process	GO:0050794	Regulation of cellular process
Heat stress	T459_08330	4072.A0A2G2ZW63	GO Process	GO:0050896	Response to stimulus
Heat stress	T459_08330	4072.A0A2G2ZW63	GO Process	GO:0051239	Regulation of multicellular organismal process
Heat stress	T459_08330	4072.A0A2G2ZW63	GO Process	GO:0051606	Detection of stimulus
Heat stress	T459_08330	4072.A0A2G2ZW63	GO Process	GO:0051716	Cellular response to stimulus
Heat stress	T459_08330	4072.A0A2G2ZW63	GO Process	GO:0061458	Reproductive system development
Heat stress	T459_08330	4072.A0A2G2ZW63	GO Process	GO:0065007	Biological regulation
Heat stress	T459_08330	4072.A0A2G2ZW63	GO Process	GO:0070647	Protein modification by small protein conjugation or removal
Heat stress	T459_08330	4072.A0A2G2ZW63	GO Process	GO:0071214	Cellular response to abiotic stimulus
Heat stress	T459_08330	4072.A0A2G2ZW63	GO Process	GO:0071478	Cellular response to radiation
Heat stress	T459_08330	4072.A0A2G2ZW63	GO Process	GO:0071482	Cellular response to light stimulus
Heat stress	T459_08330	4072.A0A2G2ZW63	GO Process	GO:0071489	Cellular response to red or far red light
Heat stress	T459_08330	4072.A0A2G2ZW63	GO Process	GO:0071704	Organic substance metabolic process
Heat stress	T459_08330	4072.A0A2G2ZW63	GO Process	GO:0099402	Plant organ development
Heat stress	T459_08330	4072.A0A2G2ZW63	GO Process	GO:0104004	Cellular response to environmental stimulus
Heat stress	T459_08330	4072.A0A2G2ZW63	GO Process	GO:1901564	Organonitrogen compound metabolic process
Heat stress	T459_08330	4072.A0A2G2ZW63	GO Process	GO:2000026	Regulation of multicellular organismal development
Heat stress	T459_08330	4072.A0A2G2ZW63	GO Process	GO:2000030	Regulation of response to red or far red light
Heat stress	T459_09321	4072.A0A2G2ZZ20	GO Process	GO:0006807	Nitrogen compound metabolic process
Heat stress	T459_09321	4072.A0A2G2ZZ20	GO Process	GO:0008152	Metabolic process
Heat stress	T459_09321	4072.A0A2G2ZZ20	GO Process	GO:0016567	Protein ubiquitination
Heat stress	T459_09321	4072.A0A2G2ZZ20	GO Process	GO:0019538	Protein metabolic process
Heat stress	T459_09321	4072.A0A2G2ZZ20	GO Process	GO:0032446	Protein modification by small protein conjugation
Heat stress	T459_09321	4072.A0A2G2ZZ20	GO Process	GO:0036211	Protein modification process
Heat stress	T459_09321	4072.A0A2G2ZZ20	GO Process	GO:0043170	Macromolecule metabolic process
Heat stress	T459_09321	4072.A0A2G2ZZ20	GO Process	GO:0043412	Macromolecule modification
Heat stress	T459_09321	4072.A0A2G2ZZ20	GO Process	GO:0044238	Primary metabolic process
Heat stress	T459_09321	4072.A0A2G2ZZ20	GO Process	GO:0070647	Protein modification by small protein conjugation or removal
Heat stress	T459_09321	4072.A0A2G2ZZ20	GO Process	GO:0071704	Organic substance metabolic process
Heat stress	T459_09321	4072.A0A2G2ZZ20	GO Process	GO:1901564	Organonitrogen compound metabolic process
Heat stress	T459_09363	4072.A0A1U8FZK0	GO Process	GO:0006465	Signal peptide processing
Heat stress	T459_09363	4072.A0A1U8FZK0	GO Process	GO:0006508	Proteolysis
Heat stress	T459_09363	4072.A0A1U8FZK0	GO Process	GO:0006518	Peptide metabolic process
Heat stress	T459_09363	4072.A0A1U8FZK0	GO Process	GO:0006807	Nitrogen compound metabolic process
Heat stress	T459_09363	4072.A0A1U8FZK0	GO Process	GO:0008152	Metabolic process
Heat stress	T459_09363	4072.A0A1U8FZK0	GO Process	GO:0009987	Cellular process
Heat stress	T459_09363	4072.A0A1U8FZK0	GO Process	GO:0010467	Gene expression
Heat stress	T459_09363	4072.A0A1U8FZK0	GO Process	GO:0016485	Protein processing
Heat stress	T459_09363	4072.A0A1U8FZK0	GO Process	GO:0019538	Protein metabolic process
Heat stress	T459_09363	4072.A0A1U8FZK0	GO Process	GO:0033619	Membrane protein proteolysis
Heat stress	T459_09363	4072.A0A1U8FZK0	GO Process	GO:0034641	Cellular nitrogen compound metabolic process
Heat stress	T459_09363	4072.A0A1U8FZK0	GO Process	GO:0043170	Macromolecule metabolic process
Heat stress	T459_09363	4072.A0A1U8FZK0	GO Process	GO:0043603	Cellular amide metabolic process
Heat stress	T459_09363	4072.A0A1U8FZK0	GO Process	GO:0044237	Cellular metabolic process
Heat stress	T459_09363	4072.A0A1U8FZK0	GO Process	GO:0044238	Primary metabolic process
Heat stress	T459_09363	4072.A0A1U8FZK0	GO Process	GO:0051604	Protein maturation
Heat stress	T459_09363	4072.A0A1U8FZK0	GO Process	GO:0071704	Organic substance metabolic process
Heat stress	T459_09363	4072.A0A1U8FZK0	GO Process	GO:1901564	Organonitrogen compound metabolic process
Heat stress	T459_10497	4072.A0A2G3A2H8	GO Process	GO:0000462	Maturation of SSU-rRNA from tricistronic rRNA transcript (SSU-rRNA, 5.8S rRNA, LSU-rRNA)
Heat stress	T459_10497	4072.A0A2G3A2H8	GO Process	GO:0006139	Nucleobase-containing compound metabolic process
Heat stress	T459_10497	4072.A0A2G3A2H8	GO Process	GO:0006364	rRNA processing
Heat stress	T459_10497	4072.A0A2G3A2H8	GO Process	GO:0006396	RNA processing
Heat stress	T459_10497	4072.A0A2G3A2H8	GO Process	GO:0006725	Cellular aromatic compound metabolic process
Heat stress	T459_10497	4072.A0A2G3A2H8	GO Process	GO:0006807	Nitrogen compound metabolic process
Heat stress	T459_10497	4072.A0A2G3A2H8	GO Process	GO:0008152	Metabolic process
Heat stress	T459_10497	4072.A0A2G3A2H8	GO Process	GO:0009987	Cellular process
Heat stress	T459_10497	4072.A0A2G3A2H8	GO Process	GO:0010467	Gene expression
Heat stress	T459_10497	4072.A0A2G3A2H8	GO Process	GO:0016070	RNA metabolic process
Heat stress	T459_10497	4072.A0A2G3A2H8	GO Process	GO:0016072	rRNA metabolic process
Heat stress	T459_10497	4072.A0A2G3A2H8	GO Process	GO:0022613	Ribonucleoprotein complex biogenesis
Heat stress	T459_10497	4072.A0A2G3A2H8	GO Process	GO:0030490	Maturation of SSU-rRNA
Heat stress	T459_10497	4072.A0A2G3A2H8	GO Process	GO:0034470	ncRNA processing
Heat stress	T459_10497	4072.A0A2G3A2H8	GO Process	GO:0034641	Cellular nitrogen compound metabolic process
Heat stress	T459_10497	4072.A0A2G3A2H8	GO Process	GO:0034660	ncRNA metabolic process
Heat stress	T459_10497	4072.A0A2G3A2H8	GO Process	GO:0042254	Ribosome biogenesis
Heat stress	T459_10497	4072.A0A2G3A2H8	GO Process	GO:0042274	Ribosomal small subunit biogenesis
Heat stress	T459_10497	4072.A0A2G3A2H8	GO Process	GO:0043170	Macromolecule metabolic process
Heat stress	T459_10497	4072.A0A2G3A2H8	GO Process	GO:0044085	Cellular component biogenesis
Heat stress	T459_10497	4072.A0A2G3A2H8	GO Process	GO:0044237	Cellular metabolic process
Heat stress	T459_10497	4072.A0A2G3A2H8	GO Process	GO:0044238	Primary metabolic process
Heat stress	T459_10497	4072.A0A2G3A2H8	GO Process	GO:0046483	Heterocycle metabolic process
Heat stress	T459_10497	4072.A0A2G3A2H8	GO Process	GO:0071704	Organic substance metabolic process
Heat stress	T459_10497	4072.A0A2G3A2H8	GO Process	GO:0071840	Cellular component organization or biogenesis
Heat stress	T459_10497	4072.A0A2G3A2H8	GO Process	GO:0090304	Nucleic acid metabolic process
Heat stress	T459_10497	4072.A0A2G3A2H8	GO Process	GO:1901360	Organic cyclic compound metabolic process
Heat stress	CazAAT07	4072.A0A2G2ZNQ4	GO Process	GO:0006082	Organic acid metabolic process
Heat stress	CazAAT07	4072.A0A2G2ZNQ4	GO Process	GO:0006520	Cellular amino acid metabolic process
Heat stress	CazAAT07	4072.A0A2G2ZNQ4	GO Process	GO:0006725	Cellular aromatic compound metabolic process
Heat stress	CazAAT07	4072.A0A2G2ZNQ4	GO Process	GO:0006807	Nitrogen compound metabolic process
Heat stress	CazAAT07	4072.A0A2G2ZNQ4	GO Process	GO:0008152	Metabolic process
Heat stress	CazAAT07	4072.A0A2G2ZNQ4	GO Process	GO:0009058	Biosynthetic process
Heat stress	CazAAT07	4072.A0A2G2ZNQ4	GO Process	GO:0009987	Cellular process
Heat stress	CazAAT07	4072.A0A2G2ZNQ4	GO Process	GO:0019752	Carboxylic acid metabolic process
Heat stress	CazAAT07	4072.A0A2G2ZNQ4	GO Process	GO:0042180	Cellular ketone metabolic process
Heat stress	CazAAT07	4072.A0A2G2ZNQ4	GO Process	GO:0042537	Benzene-containing compound metabolic process
Heat stress	CazAAT07	4072.A0A2G2ZNQ4	GO Process	GO:0043436	Oxoacid metabolic process
Heat stress	CazAAT07	4072.A0A2G2ZNQ4	GO Process	GO:0044237	Cellular metabolic process
Heat stress	CazAAT07	4072.A0A2G2ZNQ4	GO Process	GO:0044238	Primary metabolic process
Heat stress	CazAAT07	4072.A0A2G2ZNQ4	GO Process	GO:0044281	Small molecule metabolic process
Heat stress	CazAAT07	4072.A0A2G2ZNQ4	GO Process	GO:0070189	Kynurenine metabolic process
Heat stress	CazAAT07	4072.A0A2G2ZNQ4	GO Process	GO:0071704	Organic substance metabolic process
Heat stress	CazAAT07	4072.A0A2G2ZNQ4	GO Process	GO:0097052	L-kynurenine metabolic process
Heat stress	CazAAT07	4072.A0A2G2ZNQ4	GO Process	GO:1901360	Organic cyclic compound metabolic process
Heat stress	CazAAT07	4072.A0A2G2ZNQ4	GO Process	GO:1901564	Organonitrogen compound metabolic process
Heat stress	CazAAT07	4072.A0A2G2ZNQ4	GO Process	GO:1901605	Alpha-amino acid metabolic process
Heat stress	T459_13289	4072.A0A1U8GKA5	GO Process	GO:0006810	Transport
Heat stress	T459_13289	4072.A0A1U8GKA5	GO Process	GO:0006897	Endocytosis
Heat stress	T459_13289	4072.A0A1U8GKA5	GO Process	GO:0006898	Receptor-mediated endocytosis
Heat stress	T459_13289	4072.A0A1U8GKA5	GO Process	GO:0009987	Cellular process
Heat stress	T459_13289	4072.A0A1U8GKA5	GO Process	GO:0016043	Cellular component organization
Heat stress	T459_13289	4072.A0A1U8GKA5	GO Process	GO:0016192	Vesicle-mediated transport
Heat stress	T459_13289	4072.A0A1U8GKA5	GO Process	GO:0022411	Cellular component disassembly
Heat stress	T459_13289	4072.A0A1U8GKA5	GO Process	GO:0032984	Protein-containing complex disassembly
Heat stress	T459_13289	4072.A0A1U8GKA5	GO Process	GO:0043933	Protein-containing complex organization
Heat stress	T459_13289	4072.A0A1U8GKA5	GO Process	GO:0051179	Localization
Heat stress	T459_13289	4072.A0A1U8GKA5	GO Process	GO:0051234	Establishment of localization
Heat stress	T459_13289	4072.A0A1U8GKA5	GO Process	GO:0051261	Protein depolymerization
Heat stress	T459_13289	4072.A0A1U8GKA5	GO Process	GO:0071840	Cellular component organization or biogenesis
Heat stress	T459_13289	4072.A0A1U8GKA5	GO Process	GO:0072318	Clathrin coat disassembly
Heat stress	T459_13289	4072.A0A1U8GKA5	GO Process	GO:0072319	Vesicle uncoating
Heat stress	T459_13289	4072.A0A1U8GKA5	GO Process	GO:0072583	Clathrin-dependent endocytosis
Heat stress	T459_13518	4072.A0A1U8GAR2	GO Process	GO:0001101	Response to acid chemical
Heat stress	T459_13518	4072.A0A1U8GAR2	GO Process	GO:0001666	Response to hypoxia
Heat stress	T459_13518	4072.A0A1U8GAR2	GO Process	GO:0006950	Response to stress
Heat stress	T459_13518	4072.A0A1U8GAR2	GO Process	GO:0009266	Response to temperature stimulus
Heat stress	T459_13518	4072.A0A1U8GAR2	GO Process	GO:0009408	Response to heat
Heat stress	T459_13518	4072.A0A1U8GAR2	GO Process	GO:0009414	Response to water deprivation
Heat stress	T459_13518	4072.A0A1U8GAR2	GO Process	GO:0009415	Response to water
Heat stress	T459_13518	4072.A0A1U8GAR2	GO Process	GO:0009628	Response to abiotic stimulus
Heat stress	T459_13518	4072.A0A1U8GAR2	GO Process	GO:0009719	Response to endogenous stimulus
Heat stress	T459_13518	4072.A0A1U8GAR2	GO Process	GO:0009725	Response to hormone
Heat stress	T459_13518	4072.A0A1U8GAR2	GO Process	GO:0009737	Response to abscisic acid
Heat stress	T459_13518	4072.A0A1U8GAR2	GO Process	GO:0009987	Cellular process
Heat stress	T459_13518	4072.A0A1U8GAR2	GO Process	GO:0010033	Response to organic substance
Heat stress	T459_13518	4072.A0A1U8GAR2	GO Process	GO:0010035	Response to inorganic substance
Heat stress	T459_13518	4072.A0A1U8GAR2	GO Process	GO:0033554	Cellular response to stress
Heat stress	T459_13518	4072.A0A1U8GAR2	GO Process	GO:0033993	Response to lipid
Heat stress	T459_13518	4072.A0A1U8GAR2	GO Process	GO:0036293	Response to decreased oxygen levels
Heat stress	T459_13518	4072.A0A1U8GAR2	GO Process	GO:0036294	Cellular response to decreased oxygen levels
Heat stress	T459_13518	4072.A0A1U8GAR2	GO Process	GO:0042221	Response to chemical
Heat stress	T459_13518	4072.A0A1U8GAR2	GO Process	GO:0050896	Response to stimulus
Heat stress	T459_13518	4072.A0A1U8GAR2	GO Process	GO:0051716	Cellular response to stimulus
Heat stress	T459_13518	4072.A0A1U8GAR2	GO Process	GO:0070482	Response to oxygen levels
Heat stress	T459_13518	4072.A0A1U8GAR2	GO Process	GO:0070887	Cellular response to chemical stimulus
Heat stress	T459_13518	4072.A0A1U8GAR2	GO Process	GO:0071453	Cellular response to oxygen levels
Heat stress	T459_13518	4072.A0A1U8GAR2	GO Process	GO:0071456	Cellular response to hypoxia
Heat stress	T459_13518	4072.A0A1U8GAR2	GO Process	GO:0097305	Response to alcohol
Heat stress	T459_13518	4072.A0A1U8GAR2	GO Process	GO:1901700	Response to oxygen-containing compound
Heat stress	T459_13640	4072.A0A2G2ZFE0	GO Process	GO:0006355	Regulation of transcription, DNA-templated
Heat stress	T459_13640	4072.A0A2G2ZFE0	GO Process	GO:0007154	Cell communication
Heat stress	T459_13640	4072.A0A2G2ZFE0	GO Process	GO:0007165	Signal transduction
Heat stress	T459_13640	4072.A0A2G2ZFE0	GO Process	GO:0009719	Response to endogenous stimulus
Heat stress	T459_13640	4072.A0A2G2ZFE0	GO Process	GO:0009725	Response to hormone
Heat stress	T459_13640	4072.A0A2G2ZFE0	GO Process	GO:0009733	Response to auxin
Heat stress	T459_13640	4072.A0A2G2ZFE0	GO Process	GO:0009734	Auxin-activated signaling pathway
Heat stress	T459_13640	4072.A0A2G2ZFE0	GO Process	GO:0009755	Hormone-mediated signaling pathway
Heat stress	T459_13640	4072.A0A2G2ZFE0	GO Process	GO:0009889	Regulation of biosynthetic process
Heat stress	T459_13640	4072.A0A2G2ZFE0	GO Process	GO:0009987	Cellular process
Heat stress	T459_13640	4072.A0A2G2ZFE0	GO Process	GO:0010033	Response to organic substance
Heat stress	T459_13640	4072.A0A2G2ZFE0	GO Process	GO:0010468	Regulation of gene expression
Heat stress	T459_13640	4072.A0A2G2ZFE0	GO Process	GO:0010556	Regulation of macromolecule biosynthetic process
Heat stress	T459_13640	4072.A0A2G2ZFE0	GO Process	GO:0019219	Regulation of nucleobase-containing compound metabolic process
Heat stress	T459_13640	4072.A0A2G2ZFE0	GO Process	GO:0019222	Regulation of metabolic process
Heat stress	T459_13640	4072.A0A2G2ZFE0	GO Process	GO:0023052	Signaling
Heat stress	T459_13640	4072.A0A2G2ZFE0	GO Process	GO:0031323	Regulation of cellular metabolic process
Heat stress	T459_13640	4072.A0A2G2ZFE0	GO Process	GO:0031326	Regulation of cellular biosynthetic process
Heat stress	T459_13640	4072.A0A2G2ZFE0	GO Process	GO:0032870	Cellular response to hormone stimulus
Heat stress	T459_13640	4072.A0A2G2ZFE0	GO Process	GO:0042221	Response to chemical
Heat stress	T459_13640	4072.A0A2G2ZFE0	GO Process	GO:0050789	Regulation of biological process
Heat stress	T459_13640	4072.A0A2G2ZFE0	GO Process	GO:0050794	Regulation of cellular process
Heat stress	T459_13640	4072.A0A2G2ZFE0	GO Process	GO:0050896	Response to stimulus
Heat stress	T459_13640	4072.A0A2G2ZFE0	GO Process	GO:0051171	Regulation of nitrogen compound metabolic process
Heat stress	T459_13640	4072.A0A2G2ZFE0	GO Process	GO:0051252	Regulation of RNA metabolic process
Heat stress	T459_13640	4072.A0A2G2ZFE0	GO Process	GO:0051716	Cellular response to stimulus
Heat stress	T459_13640	4072.A0A2G2ZFE0	GO Process	GO:0060255	Regulation of macromolecule metabolic process
Heat stress	T459_13640	4072.A0A2G2ZFE0	GO Process	GO:0065007	Biological regulation
Heat stress	T459_13640	4072.A0A2G2ZFE0	GO Process	GO:0070887	Cellular response to chemical stimulus
Heat stress	T459_13640	4072.A0A2G2ZFE0	GO Process	GO:0071310	Cellular response to organic substance
Heat stress	T459_13640	4072.A0A2G2ZFE0	GO Process	GO:0071365	Cellular response to auxin stimulus
Heat stress	T459_13640	4072.A0A2G2ZFE0	GO Process	GO:0071495	Cellular response to endogenous stimulus
Heat stress	T459_13640	4072.A0A2G2ZFE0	GO Process	GO:0080090	Regulation of primary metabolic process
Heat stress	T459_13640	4072.A0A2G2ZFE0	GO Process	GO:1903506	Regulation of nucleic acid-templated transcription
Heat stress	T459_13640	4072.A0A2G2ZFE0	GO Process	GO:2001141	Regulation of RNA biosynthetic process
Heat stress	T459_14270	4072.A0A1U8GUN0	GO Process	GO:0006950	Response to stress
Heat stress	T459_14270	4072.A0A1U8GUN0	GO Process	GO:0006952	Defense response
Heat stress	T459_14270	4072.A0A1U8GUN0	GO Process	GO:0009605	Response to external stimulus
Heat stress	T459_14270	4072.A0A1U8GUN0	GO Process	GO:0009607	Response to biotic stimulus
Heat stress	T459_14270	4072.A0A1U8GUN0	GO Process	GO:0043207	Response to external biotic stimulus
Heat stress	T459_14270	4072.A0A1U8GUN0	GO Process	GO:0044419	Biological process involved in interspecies interaction between organisms
Heat stress	T459_14270	4072.A0A1U8GUN0	GO Process	GO:0050896	Response to stimulus
Heat stress	T459_14270	4072.A0A1U8GUN0	GO Process	GO:0051707	Response to other organism
Heat stress	T459_14272	4072.A0A2G2ZGX9	GO Process	GO:0006468	Protein phosphorylation
Heat stress	T459_14272	4072.A0A2G2ZGX9	GO Process	GO:0006793	Phosphorus metabolic process
Heat stress	T459_14272	4072.A0A2G2ZGX9	GO Process	GO:0006796	Phosphate-containing compound metabolic process
Heat stress	T459_14272	4072.A0A2G2ZGX9	GO Process	GO:0006807	Nitrogen compound metabolic process
Heat stress	T459_14272	4072.A0A2G2ZGX9	GO Process	GO:0008152	Metabolic process
Heat stress	T459_14272	4072.A0A2G2ZGX9	GO Process	GO:0009987	Cellular process
Heat stress	T459_14272	4072.A0A2G2ZGX9	GO Process	GO:0016310	Phosphorylation
Heat stress	T459_14272	4072.A0A2G2ZGX9	GO Process	GO:0019538	Protein metabolic process
Heat stress	T459_14272	4072.A0A2G2ZGX9	GO Process	GO:0036211	Protein modification process
Heat stress	T459_14272	4072.A0A2G2ZGX9	GO Process	GO:0043170	Macromolecule metabolic process
Heat stress	T459_14272	4072.A0A2G2ZGX9	GO Process	GO:0043412	Macromolecule modification
Heat stress	T459_14272	4072.A0A2G2ZGX9	GO Process	GO:0044237	Cellular metabolic process
Heat stress	T459_14272	4072.A0A2G2ZGX9	GO Process	GO:0044238	Primary metabolic process
Heat stress	T459_14272	4072.A0A2G2ZGX9	GO Process	GO:0071704	Organic substance metabolic process
Heat stress	T459_14272	4072.A0A2G2ZGX9	GO Process	GO:1901564	Organonitrogen compound metabolic process
Heat stress	T459_15192	4072.A0A2G2ZJJ3	GO Process	GO:0006082	Organic acid metabolic process
Heat stress	T459_15192	4072.A0A2G2ZJJ3	GO Process	GO:0006084	acetyl-CoA metabolic process
Heat stress	T459_15192	4072.A0A2G2ZJJ3	GO Process	GO:0006085	acetyl-CoA biosynthetic process
Heat stress	T459_15192	4072.A0A2G2ZJJ3	GO Process	GO:0006086	acetyl-CoA biosynthetic process from pyruvate
Heat stress	T459_15192	4072.A0A2G2ZJJ3	GO Process	GO:0006090	Pyruvate metabolic process
Heat stress	T459_15192	4072.A0A2G2ZJJ3	GO Process	GO:0006139	Nucleobase-containing compound metabolic process
Heat stress	T459_15192	4072.A0A2G2ZJJ3	GO Process	GO:0006163	Purine nucleotide metabolic process
Heat stress	T459_15192	4072.A0A2G2ZJJ3	GO Process	GO:0006164	Purine nucleotide biosynthetic process
Heat stress	T459_15192	4072.A0A2G2ZJJ3	GO Process	GO:0006637	acyl-CoA metabolic process
Heat stress	T459_15192	4072.A0A2G2ZJJ3	GO Process	GO:0006725	Cellular aromatic compound metabolic process
Heat stress	T459_15192	4072.A0A2G2ZJJ3	GO Process	GO:0006753	Nucleoside phosphate metabolic process
Heat stress	T459_15192	4072.A0A2G2ZJJ3	GO Process	GO:0006790	Sulfur compound metabolic process
Heat stress	T459_15192	4072.A0A2G2ZJJ3	GO Process	GO:0006793	Phosphorus metabolic process
Heat stress	T459_15192	4072.A0A2G2ZJJ3	GO Process	GO:0006796	Phosphate-containing compound metabolic process
Heat stress	T459_15192	4072.A0A2G2ZJJ3	GO Process	GO:0006807	Nitrogen compound metabolic process
Heat stress	T459_15192	4072.A0A2G2ZJJ3	GO Process	GO:0008152	Metabolic process
Heat stress	T459_15192	4072.A0A2G2ZJJ3	GO Process	GO:0009058	Biosynthetic process
Heat stress	T459_15192	4072.A0A2G2ZJJ3	GO Process	GO:0009117	Nucleotide metabolic process
Heat stress	T459_15192	4072.A0A2G2ZJJ3	GO Process	GO:0009150	Purine ribonucleotide metabolic process
Heat stress	T459_15192	4072.A0A2G2ZJJ3	GO Process	GO:0009152	Purine ribonucleotide biosynthetic process
Heat stress	T459_15192	4072.A0A2G2ZJJ3	GO Process	GO:0009165	Nucleotide biosynthetic process
Heat stress	T459_15192	4072.A0A2G2ZJJ3	GO Process	GO:0009259	Ribonucleotide metabolic process
Heat stress	T459_15192	4072.A0A2G2ZJJ3	GO Process	GO:0009260	Ribonucleotide biosynthetic process
Heat stress	T459_15192	4072.A0A2G2ZJJ3	GO Process	GO:0009987	Cellular process
Heat stress	T459_15192	4072.A0A2G2ZJJ3	GO Process	GO:0018130	Heterocycle biosynthetic process
Heat stress	T459_15192	4072.A0A2G2ZJJ3	GO Process	GO:0019438	Aromatic compound biosynthetic process
Heat stress	T459_15192	4072.A0A2G2ZJJ3	GO Process	GO:0019637	Organophosphate metabolic process
Heat stress	T459_15192	4072.A0A2G2ZJJ3	GO Process	GO:0019693	Ribose phosphate metabolic process
Heat stress	T459_15192	4072.A0A2G2ZJJ3	GO Process	GO:0019725	Cellular homeostasis
Heat stress	T459_15192	4072.A0A2G2ZJJ3	GO Process	GO:0019752	Carboxylic acid metabolic process
Heat stress	T459_15192	4072.A0A2G2ZJJ3	GO Process	GO:0032787	Monocarboxylic acid metabolic process
Heat stress	T459_15192	4072.A0A2G2ZJJ3	GO Process	GO:0033865	Nucleoside bisphosphate metabolic process
Heat stress	T459_15192	4072.A0A2G2ZJJ3	GO Process	GO:0033866	Nucleoside bisphosphate biosynthetic process
Heat stress	T459_15192	4072.A0A2G2ZJJ3	GO Process	GO:0033875	Ribonucleoside bisphosphate metabolic process
Heat stress	T459_15192	4072.A0A2G2ZJJ3	GO Process	GO:0034030	Ribonucleoside bisphosphate biosynthetic process
Heat stress	T459_15192	4072.A0A2G2ZJJ3	GO Process	GO:0034032	Purine nucleoside bisphosphate metabolic process
Heat stress	T459_15192	4072.A0A2G2ZJJ3	GO Process	GO:0034033	Purine nucleoside bisphosphate biosynthetic process
Heat stress	T459_15192	4072.A0A2G2ZJJ3	GO Process	GO:0034641	Cellular nitrogen compound metabolic process
Heat stress	T459_15192	4072.A0A2G2ZJJ3	GO Process	GO:0034654	Nucleobase-containing compound biosynthetic process
Heat stress	T459_15192	4072.A0A2G2ZJJ3	GO Process	GO:0035383	Thioester metabolic process
Heat stress	T459_15192	4072.A0A2G2ZJJ3	GO Process	GO:0035384	Thioester biosynthetic process
Heat stress	T459_15192	4072.A0A2G2ZJJ3	GO Process	GO:0042221	Response to chemical
Heat stress	T459_15192	4072.A0A2G2ZJJ3	GO Process	GO:0042592	Homeostatic process
Heat stress	T459_15192	4072.A0A2G2ZJJ3	GO Process	GO:0043436	Oxoacid metabolic process
Heat stress	T459_15192	4072.A0A2G2ZJJ3	GO Process	GO:0043603	Cellular amide metabolic process
Heat stress	T459_15192	4072.A0A2G2ZJJ3	GO Process	GO:0043604	Amide biosynthetic process
Heat stress	T459_15192	4072.A0A2G2ZJJ3	GO Process	GO:0044237	Cellular metabolic process
Heat stress	T459_15192	4072.A0A2G2ZJJ3	GO Process	GO:0044238	Primary metabolic process
Heat stress	T459_15192	4072.A0A2G2ZJJ3	GO Process	GO:0044249	Cellular biosynthetic process
Heat stress	T459_15192	4072.A0A2G2ZJJ3	GO Process	GO:0044271	Cellular nitrogen compound biosynthetic process
Heat stress	T459_15192	4072.A0A2G2ZJJ3	GO Process	GO:0044272	Sulfur compound biosynthetic process
Heat stress	T459_15192	4072.A0A2G2ZJJ3	GO Process	GO:0044281	Small molecule metabolic process
Heat stress	T459_15192	4072.A0A2G2ZJJ3	GO Process	GO:0045454	Cell redox homeostasis
Heat stress	T459_15192	4072.A0A2G2ZJJ3	GO Process	GO:0046390	Ribose phosphate biosynthetic process
Heat stress	T459_15192	4072.A0A2G2ZJJ3	GO Process	GO:0046483	Heterocycle metabolic process
Heat stress	T459_15192	4072.A0A2G2ZJJ3	GO Process	GO:0046685	Response to arsenic-containing substance
Heat stress	T459_15192	4072.A0A2G2ZJJ3	GO Process	GO:0050789	Regulation of biological process
Heat stress	T459_15192	4072.A0A2G2ZJJ3	GO Process	GO:0050794	Regulation of cellular process
Heat stress	T459_15192	4072.A0A2G2ZJJ3	GO Process	GO:0050896	Response to stimulus
Heat stress	T459_15192	4072.A0A2G2ZJJ3	GO Process	GO:0055086	Nucleobase-containing small molecule metabolic process
Heat stress	T459_15192	4072.A0A2G2ZJJ3	GO Process	GO:0065007	Biological regulation
Heat stress	T459_15192	4072.A0A2G2ZJJ3	GO Process	GO:0065008	Regulation of biological quality
Heat stress	T459_15192	4072.A0A2G2ZJJ3	GO Process	GO:0071616	acyl-CoA biosynthetic process
Heat stress	T459_15192	4072.A0A2G2ZJJ3	GO Process	GO:0071704	Organic substance metabolic process
Heat stress	T459_15192	4072.A0A2G2ZJJ3	GO Process	GO:0072521	Purine-containing compound metabolic process
Heat stress	T459_15192	4072.A0A2G2ZJJ3	GO Process	GO:0072522	Purine-containing compound biosynthetic process
Heat stress	T459_15192	4072.A0A2G2ZJJ3	GO Process	GO:0090407	Organophosphate biosynthetic process
Heat stress	T459_15192	4072.A0A2G2ZJJ3	GO Process	GO:1901135	Carbohydrate derivative metabolic process
Heat stress	T459_15192	4072.A0A2G2ZJJ3	GO Process	GO:1901137	Carbohydrate derivative biosynthetic process
Heat stress	T459_15192	4072.A0A2G2ZJJ3	GO Process	GO:1901293	Nucleoside phosphate biosynthetic process
Heat stress	T459_15192	4072.A0A2G2ZJJ3	GO Process	GO:1901360	Organic cyclic compound metabolic process
Heat stress	T459_15192	4072.A0A2G2ZJJ3	GO Process	GO:1901362	Organic cyclic compound biosynthetic process
Heat stress	T459_15192	4072.A0A2G2ZJJ3	GO Process	GO:1901564	Organonitrogen compound metabolic process
Heat stress	T459_15192	4072.A0A2G2ZJJ3	GO Process	GO:1901566	Organonitrogen compound biosynthetic process
Heat stress	T459_15192	4072.A0A2G2ZJJ3	GO Process	GO:1901576	Organic substance biosynthetic process
Heat stress	T459_15476	4072.A0A2G2ZKJ8	GO Process	GO:0000463	Maturation of LSU-rRNA from tricistronic rRNA transcript (SSU-rRNA, 5.8S rRNA, LSU-rRNA)
Heat stress	T459_15476	4072.A0A2G2ZKJ8	GO Process	GO:0000470	Maturation of LSU-rRNA
Heat stress	T459_15476	4072.A0A2G2ZKJ8	GO Process	GO:0006139	Nucleobase-containing compound metabolic process
Heat stress	T459_15476	4072.A0A2G2ZKJ8	GO Process	GO:0006364	rRNA processing
Heat stress	T459_15476	4072.A0A2G2ZKJ8	GO Process	GO:0006396	RNA processing
Heat stress	T459_15476	4072.A0A2G2ZKJ8	GO Process	GO:0006412	Translation
Heat stress	T459_15476	4072.A0A2G2ZKJ8	GO Process	GO:0006518	Peptide metabolic process
Heat stress	T459_15476	4072.A0A2G2ZKJ8	GO Process	GO:0006725	Cellular aromatic compound metabolic process
Heat stress	T459_15476	4072.A0A2G2ZKJ8	GO Process	GO:0006807	Nitrogen compound metabolic process
Heat stress	T459_15476	4072.A0A2G2ZKJ8	GO Process	GO:0008152	Metabolic process
Heat stress	T459_15476	4072.A0A2G2ZKJ8	GO Process	GO:0009058	Biosynthetic process
Heat stress	T459_15476	4072.A0A2G2ZKJ8	GO Process	GO:0009059	Macromolecule biosynthetic process
Heat stress	T459_15476	4072.A0A2G2ZKJ8	GO Process	GO:0009987	Cellular process
Heat stress	T459_15476	4072.A0A2G2ZKJ8	GO Process	GO:0010467	Gene expression
Heat stress	T459_15476	4072.A0A2G2ZKJ8	GO Process	GO:0016070	RNA metabolic process
Heat stress	T459_15476	4072.A0A2G2ZKJ8	GO Process	GO:0016072	rRNA metabolic process
Heat stress	T459_15476	4072.A0A2G2ZKJ8	GO Process	GO:0019538	Protein metabolic process
Heat stress	T459_15476	4072.A0A2G2ZKJ8	GO Process	GO:0022613	Ribonucleoprotein complex biogenesis
Heat stress	T459_15476	4072.A0A2G2ZKJ8	GO Process	GO:0034470	ncRNA processing
Heat stress	T459_15476	4072.A0A2G2ZKJ8	GO Process	GO:0034641	Cellular nitrogen compound metabolic process
Heat stress	T459_15476	4072.A0A2G2ZKJ8	GO Process	GO:0034645	Cellular macromolecule biosynthetic process
Heat stress	T459_15476	4072.A0A2G2ZKJ8	GO Process	GO:0034660	ncRNA metabolic process
Heat stress	T459_15476	4072.A0A2G2ZKJ8	GO Process	GO:0042254	Ribosome biogenesis
Heat stress	T459_15476	4072.A0A2G2ZKJ8	GO Process	GO:0042273	Ribosomal large subunit biogenesis
Heat stress	T459_15476	4072.A0A2G2ZKJ8	GO Process	GO:0043043	Peptide biosynthetic process
Heat stress	T459_15476	4072.A0A2G2ZKJ8	GO Process	GO:0043170	Macromolecule metabolic process
Heat stress	T459_15476	4072.A0A2G2ZKJ8	GO Process	GO:0043603	Cellular amide metabolic process
Heat stress	T459_15476	4072.A0A2G2ZKJ8	GO Process	GO:0043604	Amide biosynthetic process
Heat stress	T459_15476	4072.A0A2G2ZKJ8	GO Process	GO:0044085	Cellular component biogenesis
Heat stress	T459_15476	4072.A0A2G2ZKJ8	GO Process	GO:0044237	Cellular metabolic process
Heat stress	T459_15476	4072.A0A2G2ZKJ8	GO Process	GO:0044238	Primary metabolic process
Heat stress	T459_15476	4072.A0A2G2ZKJ8	GO Process	GO:0044249	Cellular biosynthetic process
Heat stress	T459_15476	4072.A0A2G2ZKJ8	GO Process	GO:0044260	Cellular macromolecule metabolic process
Heat stress	T459_15476	4072.A0A2G2ZKJ8	GO Process	GO:0044271	Cellular nitrogen compound biosynthetic process
Heat stress	T459_15476	4072.A0A2G2ZKJ8	GO Process	GO:0046483	Heterocycle metabolic process
Heat stress	T459_15476	4072.A0A2G2ZKJ8	GO Process	GO:0071704	Organic substance metabolic process
Heat stress	T459_15476	4072.A0A2G2ZKJ8	GO Process	GO:0071840	Cellular component organization or biogenesis
Heat stress	T459_15476	4072.A0A2G2ZKJ8	GO Process	GO:0090304	Nucleic acid metabolic process
Heat stress	T459_15476	4072.A0A2G2ZKJ8	GO Process	GO:1901360	Organic cyclic compound metabolic process
Heat stress	T459_15476	4072.A0A2G2ZKJ8	GO Process	GO:1901564	Organonitrogen compound metabolic process
Heat stress	T459_15476	4072.A0A2G2ZKJ8	GO Process	GO:1901566	Organonitrogen compound biosynthetic process
Heat stress	T459_15476	4072.A0A2G2ZKJ8	GO Process	GO:1901576	Organic substance biosynthetic process
Heat stress	T459_15497	4072.A0A2G2ZKH1	GO Process	GO:0000154	rRNA modification
Heat stress	T459_15497	4072.A0A2G2ZKH1	GO Process	GO:0000455	Enzyme-directed rRNA pseudouridine synthesis
Heat stress	T459_15497	4072.A0A2G2ZKH1	GO Process	GO:0001522	Pseudouridine synthesis
Heat stress	T459_15497	4072.A0A2G2ZKH1	GO Process	GO:0006139	Nucleobase-containing compound metabolic process
Heat stress	T459_15497	4072.A0A2G2ZKH1	GO Process	GO:0006364	rRNA processing
Heat stress	T459_15497	4072.A0A2G2ZKH1	GO Process	GO:0006396	RNA processing
Heat stress	T459_15497	4072.A0A2G2ZKH1	GO Process	GO:0006725	Cellular aromatic compound metabolic process
Heat stress	T459_15497	4072.A0A2G2ZKH1	GO Process	GO:0006807	Nitrogen compound metabolic process
Heat stress	T459_15497	4072.A0A2G2ZKH1	GO Process	GO:0008152	Metabolic process
Heat stress	T459_15497	4072.A0A2G2ZKH1	GO Process	GO:0009451	RNA modification
Heat stress	T459_15497	4072.A0A2G2ZKH1	GO Process	GO:0009987	Cellular process
Heat stress	T459_15497	4072.A0A2G2ZKH1	GO Process	GO:0010467	Gene expression
Heat stress	T459_15497	4072.A0A2G2ZKH1	GO Process	GO:0016070	RNA metabolic process
Heat stress	T459_15497	4072.A0A2G2ZKH1	GO Process	GO:0016072	rRNA metabolic process
Heat stress	T459_15497	4072.A0A2G2ZKH1	GO Process	GO:0022613	Ribonucleoprotein complex biogenesis
Heat stress	T459_15497	4072.A0A2G2ZKH1	GO Process	GO:0030490	Maturation of SSU-rRNA
Heat stress	T459_15497	4072.A0A2G2ZKH1	GO Process	GO:0031118	rRNA pseudouridine synthesis
Heat stress	T459_15497	4072.A0A2G2ZKH1	GO Process	GO:0034470	ncRNA processing
Heat stress	T459_15497	4072.A0A2G2ZKH1	GO Process	GO:0034641	Cellular nitrogen compound metabolic process
Heat stress	T459_15497	4072.A0A2G2ZKH1	GO Process	GO:0034660	ncRNA metabolic process
Heat stress	T459_15497	4072.A0A2G2ZKH1	GO Process	GO:0042254	Ribosome biogenesis
Heat stress	T459_15497	4072.A0A2G2ZKH1	GO Process	GO:0042274	Ribosomal small subunit biogenesis
Heat stress	T459_15497	4072.A0A2G2ZKH1	GO Process	GO:0043170	Macromolecule metabolic process
Heat stress	T459_15497	4072.A0A2G2ZKH1	GO Process	GO:0043412	Macromolecule modification
Heat stress	T459_15497	4072.A0A2G2ZKH1	GO Process	GO:0044085	Cellular component biogenesis
Heat stress	T459_15497	4072.A0A2G2ZKH1	GO Process	GO:0044237	Cellular metabolic process
Heat stress	T459_15497	4072.A0A2G2ZKH1	GO Process	GO:0044238	Primary metabolic process
Heat stress	T459_15497	4072.A0A2G2ZKH1	GO Process	GO:0046483	Heterocycle metabolic process
Heat stress	T459_15497	4072.A0A2G2ZKH1	GO Process	GO:0071704	Organic substance metabolic process
Heat stress	T459_15497	4072.A0A2G2ZKH1	GO Process	GO:0071840	Cellular component organization or biogenesis
Heat stress	T459_15497	4072.A0A2G2ZKH1	GO Process	GO:0090304	Nucleic acid metabolic process
Heat stress	T459_15497	4072.A0A2G2ZKH1	GO Process	GO:1901360	Organic cyclic compound metabolic process
Heat stress	T459_16043	4072.A0A2G2Z7W0	GO Process	GO:0009987	Cellular process
Heat stress	T459_16174	4072.A0A1U8GXL0	GO Process	GO:0006810	Transport
Heat stress	T459_16174	4072.A0A1U8GXL0	GO Process	GO:0008104	Protein localization
Heat stress	T459_16174	4072.A0A1U8GXL0	GO Process	GO:0009987	Cellular process
Heat stress	T459_16174	4072.A0A1U8GXL0	GO Process	GO:0015031	Protein transport
Heat stress	T459_16174	4072.A0A1U8GXL0	GO Process	GO:0033036	Macromolecule localization
Heat stress	T459_16174	4072.A0A1U8GXL0	GO Process	GO:0045184	Establishment of protein localization
Heat stress	T459_16174	4072.A0A1U8GXL0	GO Process	GO:0051179	Localization
Heat stress	T459_16174	4072.A0A1U8GXL0	GO Process	GO:0051234	Establishment of localization
Heat stress	T459_16174	4072.A0A1U8GXL0	GO Process	GO:0051641	Cellular localization
Heat stress	T459_16174	4072.A0A1U8GXL0	GO Process	GO:0070727	Cellular macromolecule localization
Heat stress	T459_16174	4072.A0A1U8GXL0	GO Process	GO:0071702	Organic substance transport
Heat stress	T459_16174	4072.A0A1U8GXL0	GO Process	GO:0071705	Nitrogen compound transport
Heat stress	T459_17466	4072.A0A2G2ZBT9	GO Process	GO:0006468	Protein phosphorylation
Heat stress	T459_17466	4072.A0A2G2ZBT9	GO Process	GO:0006793	Phosphorus metabolic process
Heat stress	T459_17466	4072.A0A2G2ZBT9	GO Process	GO:0006796	Phosphate-containing compound metabolic process
Heat stress	T459_17466	4072.A0A2G2ZBT9	GO Process	GO:0006807	Nitrogen compound metabolic process
Heat stress	T459_17466	4072.A0A2G2ZBT9	GO Process	GO:0006810	Transport
Heat stress	T459_17466	4072.A0A2G2ZBT9	GO Process	GO:0006897	Endocytosis
Heat stress	T459_17466	4072.A0A2G2ZBT9	GO Process	GO:0007154	Cell communication
Heat stress	T459_17466	4072.A0A2G2ZBT9	GO Process	GO:0007165	Signal transduction
Heat stress	T459_17466	4072.A0A2G2ZBT9	GO Process	GO:0008152	Metabolic process
Heat stress	T459_17466	4072.A0A2G2ZBT9	GO Process	GO:0009987	Cellular process
Heat stress	T459_17466	4072.A0A2G2ZBT9	GO Process	GO:0016192	Vesicle-mediated transport
Heat stress	T459_17466	4072.A0A2G2ZBT9	GO Process	GO:0016310	Phosphorylation
Heat stress	T459_17466	4072.A0A2G2ZBT9	GO Process	GO:0018105	Peptidyl-serine phosphorylation
Heat stress	T459_17466	4072.A0A2G2ZBT9	GO Process	GO:0018193	Peptidyl-amino acid modification
Heat stress	T459_17466	4072.A0A2G2ZBT9	GO Process	GO:0018209	Peptidyl-serine modification
Heat stress	T459_17466	4072.A0A2G2ZBT9	GO Process	GO:0019538	Protein metabolic process
Heat stress	T459_17466	4072.A0A2G2ZBT9	GO Process	GO:0023052	Signaling
Heat stress	T459_17466	4072.A0A2G2ZBT9	GO Process	GO:0036211	Protein modification process
Heat stress	T459_17466	4072.A0A2G2ZBT9	GO Process	GO:0043170	Macromolecule metabolic process
Heat stress	T459_17466	4072.A0A2G2ZBT9	GO Process	GO:0043412	Macromolecule modification
Heat stress	T459_17466	4072.A0A2G2ZBT9	GO Process	GO:0044237	Cellular metabolic process
Heat stress	T459_17466	4072.A0A2G2ZBT9	GO Process	GO:0044238	Primary metabolic process
Heat stress	T459_17466	4072.A0A2G2ZBT9	GO Process	GO:0050789	Regulation of biological process
Heat stress	T459_17466	4072.A0A2G2ZBT9	GO Process	GO:0050794	Regulation of cellular process
Heat stress	T459_17466	4072.A0A2G2ZBT9	GO Process	GO:0050896	Response to stimulus
Heat stress	T459_17466	4072.A0A2G2ZBT9	GO Process	GO:0051179	Localization
Heat stress	T459_17466	4072.A0A2G2ZBT9	GO Process	GO:0051234	Establishment of localization
Heat stress	T459_17466	4072.A0A2G2ZBT9	GO Process	GO:0051716	Cellular response to stimulus
Heat stress	T459_17466	4072.A0A2G2ZBT9	GO Process	GO:0065007	Biological regulation
Heat stress	T459_17466	4072.A0A2G2ZBT9	GO Process	GO:0071704	Organic substance metabolic process
Heat stress	T459_17466	4072.A0A2G2ZBT9	GO Process	GO:1901564	Organonitrogen compound metabolic process
Heat stress	T459_18014	4072.A0A2G2ZD85	GO Process	GO:0006355	Regulation of transcription, DNA-templated
Heat stress	T459_18014	4072.A0A2G2ZD85	GO Process	GO:0007275	Multicellular organism development
Heat stress	T459_18014	4072.A0A2G2ZD85	GO Process	GO:0009555	Pollen development
Heat stress	T459_18014	4072.A0A2G2ZD85	GO Process	GO:0009889	Regulation of biosynthetic process
Heat stress	T459_18014	4072.A0A2G2ZD85	GO Process	GO:0010468	Regulation of gene expression
Heat stress	T459_18014	4072.A0A2G2ZD85	GO Process	GO:0010556	Regulation of macromolecule biosynthetic process
Heat stress	T459_18014	4072.A0A2G2ZD85	GO Process	GO:0019219	Regulation of nucleobase-containing compound metabolic process
Heat stress	T459_18014	4072.A0A2G2ZD85	GO Process	GO:0019222	Regulation of metabolic process
Heat stress	T459_18014	4072.A0A2G2ZD85	GO Process	GO:0031323	Regulation of cellular metabolic process
Heat stress	T459_18014	4072.A0A2G2ZD85	GO Process	GO:0031326	Regulation of cellular biosynthetic process
Heat stress	T459_18014	4072.A0A2G2ZD85	GO Process	GO:0032501	Multicellular organismal process
Heat stress	T459_18014	4072.A0A2G2ZD85	GO Process	GO:0032502	Developmental process
Heat stress	T459_18014	4072.A0A2G2ZD85	GO Process	GO:0048229	Gametophyte development
Heat stress	T459_18014	4072.A0A2G2ZD85	GO Process	GO:0048856	Anatomical structure development
Heat stress	T459_18014	4072.A0A2G2ZD85	GO Process	GO:0050789	Regulation of biological process
Heat stress	T459_18014	4072.A0A2G2ZD85	GO Process	GO:0050794	Regulation of cellular process
Heat stress	T459_18014	4072.A0A2G2ZD85	GO Process	GO:0051171	Regulation of nitrogen compound metabolic process
Heat stress	T459_18014	4072.A0A2G2ZD85	GO Process	GO:0051252	Regulation of RNA metabolic process
Heat stress	T459_18014	4072.A0A2G2ZD85	GO Process	GO:0060255	Regulation of macromolecule metabolic process
Heat stress	T459_18014	4072.A0A2G2ZD85	GO Process	GO:0065007	Biological regulation
Heat stress	T459_18014	4072.A0A2G2ZD85	GO Process	GO:0080090	Regulation of primary metabolic process
Heat stress	T459_18014	4072.A0A2G2ZD85	GO Process	GO:1903506	Regulation of nucleic acid-templated transcription
Heat stress	T459_18014	4072.A0A2G2ZD85	GO Process	GO:2001141	Regulation of RNA biosynthetic process
Heat stress	CazAAT08	4072.A0A2G2ZEV5	GO Process	GO:0006082	Organic acid metabolic process
Heat stress	CazAAT08	4072.A0A2G2ZEV5	GO Process	GO:0006520	Cellular amino acid metabolic process
Heat stress	CazAAT08	4072.A0A2G2ZEV5	GO Process	GO:0006807	Nitrogen compound metabolic process
Heat stress	CazAAT08	4072.A0A2G2ZEV5	GO Process	GO:0008152	Metabolic process
Heat stress	CazAAT08	4072.A0A2G2ZEV5	GO Process	GO:0009058	Biosynthetic process
Heat stress	CazAAT08	4072.A0A2G2ZEV5	GO Process	GO:0009987	Cellular process
Heat stress	CazAAT08	4072.A0A2G2ZEV5	GO Process	GO:0019752	Carboxylic acid metabolic process
Heat stress	CazAAT08	4072.A0A2G2ZEV5	GO Process	GO:0043436	Oxoacid metabolic process
Heat stress	CazAAT08	4072.A0A2G2ZEV5	GO Process	GO:0044237	Cellular metabolic process
Heat stress	CazAAT08	4072.A0A2G2ZEV5	GO Process	GO:0044238	Primary metabolic process
Heat stress	CazAAT08	4072.A0A2G2ZEV5	GO Process	GO:0044281	Small molecule metabolic process
Heat stress	CazAAT08	4072.A0A2G2ZEV5	GO Process	GO:0071704	Organic substance metabolic process
Heat stress	CazAAT08	4072.A0A2G2ZEV5	GO Process	GO:1901564	Organonitrogen compound metabolic process
Heat stress	CazAAT08	4072.A0A2G2ZEV5	GO Process	GO:1901605	Alpha-amino acid metabolic process
Heat stress	T459_18918	4072.A0A2G2Z081	GO Process	GO:0006468	Protein phosphorylation
Heat stress	T459_18918	4072.A0A2G2Z081	GO Process	GO:0006793	Phosphorus metabolic process
Heat stress	T459_18918	4072.A0A2G2Z081	GO Process	GO:0006796	Phosphate-containing compound metabolic process
Heat stress	T459_18918	4072.A0A2G2Z081	GO Process	GO:0006807	Nitrogen compound metabolic process
Heat stress	T459_18918	4072.A0A2G2Z081	GO Process	GO:0008152	Metabolic process
Heat stress	T459_18918	4072.A0A2G2Z081	GO Process	GO:0009987	Cellular process
Heat stress	T459_18918	4072.A0A2G2Z081	GO Process	GO:0016310	Phosphorylation
Heat stress	T459_18918	4072.A0A2G2Z081	GO Process	GO:0019538	Protein metabolic process
Heat stress	T459_18918	4072.A0A2G2Z081	GO Process	GO:0036211	Protein modification process
Heat stress	T459_18918	4072.A0A2G2Z081	GO Process	GO:0043170	Macromolecule metabolic process
Heat stress	T459_18918	4072.A0A2G2Z081	GO Process	GO:0043412	Macromolecule modification
Heat stress	T459_18918	4072.A0A2G2Z081	GO Process	GO:0044237	Cellular metabolic process
Heat stress	T459_18918	4072.A0A2G2Z081	GO Process	GO:0044238	Primary metabolic process
Heat stress	T459_18918	4072.A0A2G2Z081	GO Process	GO:0071704	Organic substance metabolic process
Heat stress	T459_18918	4072.A0A2G2Z081	GO Process	GO:1901564	Organonitrogen compound metabolic process
Heat stress	T459_19303	4072.A0A2G2Z1K3	GO Process	GO:0000003	Reproduction
Heat stress	T459_19303	4072.A0A2G2Z1K3	GO Process	GO:0000902	Cell morphogenesis
Heat stress	T459_19303	4072.A0A2G2Z1K3	GO Process	GO:0000904	Cell morphogenesis involved in differentiation
Heat stress	T459_19303	4072.A0A2G2Z1K3	GO Process	GO:0003006	Developmental process involved in reproduction
Heat stress	T459_19303	4072.A0A2G2Z1K3	GO Process	GO:0006810	Transport
Heat stress	T459_19303	4072.A0A2G2Z1K3	GO Process	GO:0006996	Organelle organization
Heat stress	T459_19303	4072.A0A2G2Z1K3	GO Process	GO:0007010	Cytoskeleton organization
Heat stress	T459_19303	4072.A0A2G2Z1K3	GO Process	GO:0007015	Actin filament organization
Heat stress	T459_19303	4072.A0A2G2Z1K3	GO Process	GO:0009653	Anatomical structure morphogenesis
Heat stress	T459_19303	4072.A0A2G2Z1K3	GO Process	GO:0009826	Unidimensional cell growth
Heat stress	T459_19303	4072.A0A2G2Z1K3	GO Process	GO:0009932	Cell tip growth
Heat stress	T459_19303	4072.A0A2G2Z1K3	GO Process	GO:0009987	Cellular process
Heat stress	T459_19303	4072.A0A2G2Z1K3	GO Process	GO:0016043	Cellular component organization
Heat stress	T459_19303	4072.A0A2G2Z1K3	GO Process	GO:0016049	Cell growth
Heat stress	T459_19303	4072.A0A2G2Z1K3	GO Process	GO:0022414	Reproductive process
Heat stress	T459_19303	4072.A0A2G2Z1K3	GO Process	GO:0030029	Actin filament-based process
Heat stress	T459_19303	4072.A0A2G2Z1K3	GO Process	GO:0030036	Actin cytoskeleton organization
Heat stress	T459_19303	4072.A0A2G2Z1K3	GO Process	GO:0030048	Actin filament-based movement
Heat stress	T459_19303	4072.A0A2G2Z1K3	GO Process	GO:0030050	Vesicle transport along actin filament
Heat stress	T459_19303	4072.A0A2G2Z1K3	GO Process	GO:0030154	Cell differentiation
Heat stress	T459_19303	4072.A0A2G2Z1K3	GO Process	GO:0030705	Cytoskeleton-dependent intracellular transport
Heat stress	T459_19303	4072.A0A2G2Z1K3	GO Process	GO:0032501	Multicellular organismal process
Heat stress	T459_19303	4072.A0A2G2Z1K3	GO Process	GO:0032502	Developmental process
Heat stress	T459_19303	4072.A0A2G2Z1K3	GO Process	GO:0040007	Growth
Heat stress	T459_19303	4072.A0A2G2Z1K3	GO Process	GO:0046907	Intracellular transport
Heat stress	T459_19303	4072.A0A2G2Z1K3	GO Process	GO:0048468	Cell development
Heat stress	T459_19303	4072.A0A2G2Z1K3	GO Process	GO:0048588	Developmental cell growth
Heat stress	T459_19303	4072.A0A2G2Z1K3	GO Process	GO:0048589	Developmental growth
Heat stress	T459_19303	4072.A0A2G2Z1K3	GO Process	GO:0048856	Anatomical structure development
Heat stress	T459_19303	4072.A0A2G2Z1K3	GO Process	GO:0048869	Cellular developmental process
Heat stress	T459_19303	4072.A0A2G2Z1K3	GO Process	GO:0051179	Localization
Heat stress	T459_19303	4072.A0A2G2Z1K3	GO Process	GO:0051234	Establishment of localization
Heat stress	T459_19303	4072.A0A2G2Z1K3	GO Process	GO:0051640	Organelle localization
Heat stress	T459_19303	4072.A0A2G2Z1K3	GO Process	GO:0051641	Cellular localization
Heat stress	T459_19303	4072.A0A2G2Z1K3	GO Process	GO:0051648	Vesicle localization
Heat stress	T459_19303	4072.A0A2G2Z1K3	GO Process	GO:0051649	Establishment of localization in cell
Heat stress	T459_19303	4072.A0A2G2Z1K3	GO Process	GO:0051650	Establishment of vesicle localization
Heat stress	T459_19303	4072.A0A2G2Z1K3	GO Process	GO:0051656	Establishment of organelle localization
Heat stress	T459_19303	4072.A0A2G2Z1K3	GO Process	GO:0060560	Developmental growth involved in morphogenesis
Heat stress	T459_19303	4072.A0A2G2Z1K3	GO Process	GO:0071840	Cellular component organization or biogenesis
Heat stress	T459_19303	4072.A0A2G2Z1K3	GO Process	GO:0097435	Supramolecular fiber organization
Heat stress	T459_19303	4072.A0A2G2Z1K3	GO Process	GO:0099515	Actin filament-based transport
Heat stress	T459_19303	4072.A0A2G2Z1K3	GO Process	GO:0099518	Vesicle cytoskeletal trafficking
Heat stress	T459_19495	4072.A0A1U8HAU7	GO Process	GO:0006325	Chromatin organization
Heat stress	T459_19495	4072.A0A1U8HAU7	GO Process	GO:0006338	Chromatin remodeling
Heat stress	T459_19495	4072.A0A1U8HAU7	GO Process	GO:0006355	Regulation of transcription, DNA-templated
Heat stress	T459_19495	4072.A0A1U8HAU7	GO Process	GO:0006357	Regulation of transcription by RNA polymerase II
Heat stress	T459_19495	4072.A0A1U8HAU7	GO Process	GO:0006996	Organelle organization
Heat stress	T459_19495	4072.A0A1U8HAU7	GO Process	GO:0009889	Regulation of biosynthetic process
Heat stress	T459_19495	4072.A0A1U8HAU7	GO Process	GO:0009891	Positive regulation of biosynthetic process
Heat stress	T459_19495	4072.A0A1U8HAU7	GO Process	GO:0009893	Positive regulation of metabolic process
Heat stress	T459_19495	4072.A0A1U8HAU7	GO Process	GO:0009987	Cellular process
Heat stress	T459_19495	4072.A0A1U8HAU7	GO Process	GO:0010468	Regulation of gene expression
Heat stress	T459_19495	4072.A0A1U8HAU7	GO Process	GO:0010556	Regulation of macromolecule biosynthetic process
Heat stress	T459_19495	4072.A0A1U8HAU7	GO Process	GO:0010557	Positive regulation of macromolecule biosynthetic process
Heat stress	T459_19495	4072.A0A1U8HAU7	GO Process	GO:0010604	Positive regulation of macromolecule metabolic process
Heat stress	T459_19495	4072.A0A1U8HAU7	GO Process	GO:0016043	Cellular component organization
Heat stress	T459_19495	4072.A0A1U8HAU7	GO Process	GO:0019219	Regulation of nucleobase-containing compound metabolic process
Heat stress	T459_19495	4072.A0A1U8HAU7	GO Process	GO:0019222	Regulation of metabolic process
Heat stress	T459_19495	4072.A0A1U8HAU7	GO Process	GO:0031056	Regulation of histone modification
Heat stress	T459_19495	4072.A0A1U8HAU7	GO Process	GO:0031058	Positive regulation of histone modification
Heat stress	T459_19495	4072.A0A1U8HAU7	GO Process	GO:0031323	Regulation of cellular metabolic process
Heat stress	T459_19495	4072.A0A1U8HAU7	GO Process	GO:0031325	Positive regulation of cellular metabolic process
Heat stress	T459_19495	4072.A0A1U8HAU7	GO Process	GO:0031326	Regulation of cellular biosynthetic process
Heat stress	T459_19495	4072.A0A1U8HAU7	GO Process	GO:0031328	Positive regulation of cellular biosynthetic process
Heat stress	T459_19495	4072.A0A1U8HAU7	GO Process	GO:0031399	Regulation of protein modification process
Heat stress	T459_19495	4072.A0A1U8HAU7	GO Process	GO:0031401	Positive regulation of protein modification process
Heat stress	T459_19495	4072.A0A1U8HAU7	GO Process	GO:0035065	Regulation of histone acetylation
Heat stress	T459_19495	4072.A0A1U8HAU7	GO Process	GO:0035066	Positive regulation of histone acetylation
Heat stress	T459_19495	4072.A0A1U8HAU7	GO Process	GO:0045893	Positive regulation of transcription, DNA-templated
Heat stress	T459_19495	4072.A0A1U8HAU7	GO Process	GO:0045935	Positive regulation of nucleobase-containing compound metabolic process
Heat stress	T459_19495	4072.A0A1U8HAU7	GO Process	GO:0048518	Positive regulation of biological process
Heat stress	T459_19495	4072.A0A1U8HAU7	GO Process	GO:0048522	Positive regulation of cellular process
Heat stress	T459_19495	4072.A0A1U8HAU7	GO Process	GO:0050789	Regulation of biological process
Heat stress	T459_19495	4072.A0A1U8HAU7	GO Process	GO:0050794	Regulation of cellular process
Heat stress	T459_19495	4072.A0A1U8HAU7	GO Process	GO:0051171	Regulation of nitrogen compound metabolic process
Heat stress	T459_19495	4072.A0A1U8HAU7	GO Process	GO:0051173	Positive regulation of nitrogen compound metabolic process
Heat stress	T459_19495	4072.A0A1U8HAU7	GO Process	GO:0051246	Regulation of protein metabolic process
Heat stress	T459_19495	4072.A0A1U8HAU7	GO Process	GO:0051247	Positive regulation of protein metabolic process
Heat stress	T459_19495	4072.A0A1U8HAU7	GO Process	GO:0051252	Regulation of RNA metabolic process
Heat stress	T459_19495	4072.A0A1U8HAU7	GO Process	GO:0051254	Positive regulation of RNA metabolic process
Heat stress	T459_19495	4072.A0A1U8HAU7	GO Process	GO:0051276	Chromosome organization
Heat stress	T459_19495	4072.A0A1U8HAU7	GO Process	GO:0060255	Regulation of macromolecule metabolic process
Heat stress	T459_19495	4072.A0A1U8HAU7	GO Process	GO:0065007	Biological regulation
Heat stress	T459_19495	4072.A0A1U8HAU7	GO Process	GO:0071840	Cellular component organization or biogenesis
Heat stress	T459_19495	4072.A0A1U8HAU7	GO Process	GO:0080090	Regulation of primary metabolic process
Heat stress	T459_19495	4072.A0A1U8HAU7	GO Process	GO:1901983	Regulation of protein acetylation
Heat stress	T459_19495	4072.A0A1U8HAU7	GO Process	GO:1901985	Positive regulation of protein acetylation
Heat stress	T459_19495	4072.A0A1U8HAU7	GO Process	GO:1902680	Positive regulation of RNA biosynthetic process
Heat stress	T459_19495	4072.A0A1U8HAU7	GO Process	GO:1903506	Regulation of nucleic acid-templated transcription
Heat stress	T459_19495	4072.A0A1U8HAU7	GO Process	GO:1903508	Positive regulation of nucleic acid-templated transcription
Heat stress	T459_19495	4072.A0A1U8HAU7	GO Process	GO:2000756	Regulation of peptidyl-lysine acetylation
Heat stress	T459_19495	4072.A0A1U8HAU7	GO Process	GO:2000758	Positive regulation of peptidyl-lysine acetylation
Heat stress	T459_19495	4072.A0A1U8HAU7	GO Process	GO:2001141	Regulation of RNA biosynthetic process
Heat stress	T459_19648	4072.A0A2G2Z2A0	GO Process	GO:0006807	Nitrogen compound metabolic process
Heat stress	T459_19648	4072.A0A2G2Z2A0	GO Process	GO:0008152	Metabolic process
Heat stress	T459_19648	4072.A0A2G2Z2A0	GO Process	GO:0019538	Protein metabolic process
Heat stress	T459_19648	4072.A0A2G2Z2A0	GO Process	GO:0043170	Macromolecule metabolic process
Heat stress	T459_19648	4072.A0A2G2Z2A0	GO Process	GO:0044238	Primary metabolic process
Heat stress	T459_19648	4072.A0A2G2Z2A0	GO Process	GO:0071704	Organic substance metabolic process
Heat stress	T459_19648	4072.A0A2G2Z2A0	GO Process	GO:1901564	Organonitrogen compound metabolic process
Heat stress	CazAAT10	4072.A0A1U8HBG2	GO Process	GO:0006082	Organic acid metabolic process
Heat stress	CazAAT10	4072.A0A1U8HBG2	GO Process	GO:0006520	Cellular amino acid metabolic process
Heat stress	CazAAT10	4072.A0A1U8HBG2	GO Process	GO:0006570	Tyrosine metabolic process
Heat stress	CazAAT10	4072.A0A1U8HBG2	GO Process	GO:0006572	Tyrosine catabolic process
Heat stress	CazAAT10	4072.A0A1U8HBG2	GO Process	GO:0006725	Cellular aromatic compound metabolic process
Heat stress	CazAAT10	4072.A0A1U8HBG2	GO Process	GO:0006807	Nitrogen compound metabolic process
Heat stress	CazAAT10	4072.A0A1U8HBG2	GO Process	GO:0008152	Metabolic process
Heat stress	CazAAT10	4072.A0A1U8HBG2	GO Process	GO:0009056	Catabolic process
Heat stress	CazAAT10	4072.A0A1U8HBG2	GO Process	GO:0009058	Biosynthetic process
Heat stress	CazAAT10	4072.A0A1U8HBG2	GO Process	GO:0009072	Aromatic amino acid family metabolic process
Heat stress	CazAAT10	4072.A0A1U8HBG2	GO Process	GO:0009074	Aromatic amino acid family catabolic process
Heat stress	CazAAT10	4072.A0A1U8HBG2	GO Process	GO:0009987	Cellular process
Heat stress	CazAAT10	4072.A0A1U8HBG2	GO Process	GO:0016054	Organic acid catabolic process
Heat stress	CazAAT10	4072.A0A1U8HBG2	GO Process	GO:0019439	Aromatic compound catabolic process
Heat stress	CazAAT10	4072.A0A1U8HBG2	GO Process	GO:0019752	Carboxylic acid metabolic process
Heat stress	CazAAT10	4072.A0A1U8HBG2	GO Process	GO:0043436	Oxoacid metabolic process
Heat stress	CazAAT10	4072.A0A1U8HBG2	GO Process	GO:0044237	Cellular metabolic process
Heat stress	CazAAT10	4072.A0A1U8HBG2	GO Process	GO:0044238	Primary metabolic process
Heat stress	CazAAT10	4072.A0A1U8HBG2	GO Process	GO:0044248	Cellular catabolic process
Heat stress	CazAAT10	4072.A0A1U8HBG2	GO Process	GO:0044281	Small molecule metabolic process
Heat stress	CazAAT10	4072.A0A1U8HBG2	GO Process	GO:0044282	Small molecule catabolic process
Heat stress	CazAAT10	4072.A0A1U8HBG2	GO Process	GO:0071704	Organic substance metabolic process
Heat stress	CazAAT10	4072.A0A1U8HBG2	GO Process	GO:1901360	Organic cyclic compound metabolic process
Heat stress	CazAAT10	4072.A0A1U8HBG2	GO Process	GO:1901361	Organic cyclic compound catabolic process
Heat stress	CazAAT10	4072.A0A1U8HBG2	GO Process	GO:1901564	Organonitrogen compound metabolic process
Heat stress	CazAAT10	4072.A0A1U8HBG2	GO Process	GO:1901565	Organonitrogen compound catabolic process
Heat stress	CazAAT10	4072.A0A1U8HBG2	GO Process	GO:1901575	Organic substance catabolic process
Heat stress	CazAAT10	4072.A0A1U8HBG2	GO Process	GO:1901605	Alpha-amino acid metabolic process
Heat stress	CazAAT10	4072.A0A1U8HBG2	GO Process	GO:1901606	Alpha-amino acid catabolic process
Heat stress	CazAAT09	4072.A0A1U8HJR4	GO Process	GO:0006082	Organic acid metabolic process
Heat stress	CazAAT09	4072.A0A1U8HJR4	GO Process	GO:0006520	Cellular amino acid metabolic process
Heat stress	CazAAT09	4072.A0A1U8HJR4	GO Process	GO:0006570	Tyrosine metabolic process
Heat stress	CazAAT09	4072.A0A1U8HJR4	GO Process	GO:0006572	Tyrosine catabolic process
Heat stress	CazAAT09	4072.A0A1U8HJR4	GO Process	GO:0006725	Cellular aromatic compound metabolic process
Heat stress	CazAAT09	4072.A0A1U8HJR4	GO Process	GO:0006807	Nitrogen compound metabolic process
Heat stress	CazAAT09	4072.A0A1U8HJR4	GO Process	GO:0008152	Metabolic process
Heat stress	CazAAT09	4072.A0A1U8HJR4	GO Process	GO:0009056	Catabolic process
Heat stress	CazAAT09	4072.A0A1U8HJR4	GO Process	GO:0009058	Biosynthetic process
Heat stress	CazAAT09	4072.A0A1U8HJR4	GO Process	GO:0009072	Aromatic amino acid family metabolic process
[truncated: 3,239 more rows]
