# Supplementary material for: Genome-wide identification of pepper (Capsicum annuum L.) AAT gene family and expression analysis under salt stress
Source: Research Square preprint supplement (doi:10.21203/rs.3.rs-6327205/v1), 2025-06-12
Supplement: Supplementary file 4 [file d2367f9a97ac330d7a7c3445.xlsx]

## Sheet: Sheet1
Table S1: The primers used for qRT-PCR in this study.
CaUBIF	TGTCCATCTGCTCTCTGTTG
CaUBIR	CACCCCAAGCACAATAAGAC
CazAAT04-F	CGACGCAAAAGGCATCCATC
CazAAT04-R	CGAAACATGCACGGAACCAG
CazAAT11-F	TACTGAAGCTTTCCTCGCCG
CazAAT11-R	CCATTGTTCCTCGGTCGGAT
CazAAT13-F	CGCCGTCAACAACCACTCTA
CazAAT13-R	TGCACCAACTCCCAAGTTCA
CazAAT14-F	CAACCTCCACCTTGTTTGCG
CazAAT14-R	ATCCTGGCGAGACATTGAGC
CazAAT16-F	GCTCGTCCTGGTGCTAACAT
CazAAT16-R	TGCCGTCCACTTCAACAAGT
CazAAT20-F	TGGCTACTCTTCCACTGGTG
CazAAT20-R	ACCAACCAAGTCTCCAACCA
